# Supplementary material for: Geometric Morphometric Versus Genomic Patterns in a Large Polyploid Plant Species Complex
Source: MDPI journal article supplement (doi:10.3390/biology12030418), 2023-03-09
Supplement: s1 [file s1]

Archive with 8 entries (8 files):
- biology-2225648-supplementary.pdf
- Table_S1_Information_on_220_populations.xlsx
- Table_S2_Discriminant_analysis_RADSeq_TEG_CP.xlsx
- Table_S3_Discriminant_analysis_RADSeq.xlsx
- Table_S4_Discriminant_analysis_BL_Nothotaxa.xlsx
- Table_S5_Regression_models_RADSeq_Subgenomes.xlsx
- Table_S6_Regression_models_Shape_Genomics_Environment.xlsx
- Table_S7_Regression_models_Shape_Environment.xlsx
