# Supplementary material for: Geometric Morphometric Versus Genomic Patterns in a Large Polyploid Plant Species Complex
Source: MDPI journal article supplement (doi:10.3390/biology12030418), 2023-03-09
Supplement: s1 [file s1 › Table_S1_Information_on_220_populations.xlsx]

## Sheet: Table_S1_input_data
MAJOR_GROUPS	IDENTIFIERS	IDENTIFIERS	IDENTIFIERS	IDENTIFIERS	IDENTIFIERS	IDENTIFIERS	IDENTIFIERS	BIOLOGY	BIOLOGY	BIOLOGY	BIOLOGY	GENOMICS	GENOMICS	GENOMICS	GENOMICS	GENOMICS	GENOMICS	ECOLOGY	ECOLOGY	ECOLOGY	ECOLOGY	ECOLOGY	ECOLOGY	ECOLOGY	ECOLOGY	ECOLOGY	ECOLOGY	ECOLOGY	ECOLOGY	ECOLOGY	ECOLOGY	ECOLOGY	ECOLOGY	ECOLOGY	ECOLOGY	ECOLOGY	ECOLOGY	ECOLOGY	ECOLOGY	ECOLOGY	ECOLOGY	ECOLOGY	ECOLOGY	ECOLOGY	MORPHOMETRICS	MORPHOMETRICS	MORPHOMETRICS	MORPHOMETRICS	MORPHOMETRICS
genomic_cluster_RADpainter_3_groups	taxon	population	individual	trait_number	source	file_name	trait	ploidy	reproduction	corolla_leaves_max	genetic_heterozygosity_percent_radseq	cluster_radseq_snmf	cluster_radseq_splitstree	cluster_radseq_radpainter	cluster_teg_stacey	cluster_cp_ml_tree	cluster_cp_splitstree	habitat	gps_n	gps_e	altitude	gps_wgs84_decimal_n_standard	gps_wgs84_decimal_e_standard	altitude_standard	solar_rad	bio1	bio2	bio3	bio4	bio5	bio6	bio7	bio8	bio9	bio10	bio11	bio12	bio13	bio14	bio15	bio16	bio17	bio18	bio19	Id	RawCoord1	RawCoord2	RawCoord3	RawCoord4
1	allemannii	10391	10391_G_01	10391_G_01_BL_01	garden	10391_1_BL_1_garden	BL	6N	3_apomictic_facultative_sexual	1	1.55993	1	1	1	1	1	1	humid_meadow	46.5374	10.258	1947	-0.942876	-0.657647	4.42567	2.01978	-3.61304	-2.06614	-0.595631	-1.97753	-5.19164	-1.67168	-2.45868	-2.25146	-2.05976	-5.40604	-2.0711	1.87137	2.08432	1.22024	0.242017	2.12516	1.30011	2.28449	0.8018	53	233	76	220	79
1	allemannii	10391	10391_G_01	10391_G_01_BL_02	garden	10391_1_BL_2_garden	BL	6N	3_apomictic_facultative_sexual	1	1.55993	1	1	1	1	1	1	humid_meadow	46.5374	10.258	1947	-0.942876	-0.657647	4.42567	2.01978	-3.61304	-2.06614	-0.595631	-1.97753	-5.19164	-1.67168	-2.45868	-2.25146	-2.05976	-5.40604	-2.0711	1.87137	2.08432	1.22024	0.242017	2.12516	1.30011	2.28449	0.8018	54	260	98	237	96
1	allemannii	10391	10391_G_01	10391_G_01_BL_03	garden	10391_1_BL_3_garden	BL	6N	3_apomictic_facultative_sexual	1	1.55993	1	1	1	1	1	1	humid_meadow	46.5374	10.258	1947	-0.942876	-0.657647	4.42567	2.01978	-3.61304	-2.06614	-0.595631	-1.97753	-5.19164	-1.67168	-2.45868	-2.25146	-2.05976	-5.40604	-2.0711	1.87137	2.08432	1.22024	0.242017	2.12516	1.30011	2.28449	0.8018	55	252	95	226	109
1	allemannii	10391	10391_G_01	10391_G_01_SL_01	garden	10391_1_SL_1	SL	6N	3_apomictic_facultative_sexual	1	1.55993	1	1	1	1	1	1	humid_meadow	46.5374	10.258	1947	-0.942876	-0.657647	4.42567	2.01978	-3.61304	-2.06614	-0.595631	-1.97753	-5.19164	-1.67168	-2.45868	-2.25146	-2.05976	-5.40604	-2.0711	1.87137	2.08432	1.22024	0.242017	2.12516	1.30011	2.28449	0.8018	8315	94	18	81	16
1	allemannii	10391	10391_G_01	10391_G_01_SL_02	garden	10391_1_SL_2	SL	6N	3_apomictic_facultative_sexual	1	1.55993	1	1	1	1	1	1	humid_meadow	46.5374	10.258	1947	-0.942876	-0.657647	4.42567	2.01978	-3.61304	-2.06614	-0.595631	-1.97753	-5.19164	-1.67168	-2.45868	-2.25146	-2.05976	-5.40604	-2.0711	1.87137	2.08432	1.22024	0.242017	2.12516	1.30011	2.28449	0.8018	8316	82	32	73	35
1	allemannii	10391	10391_G_01	10391_G_01_SL_03	garden	10391_1_SL_3	SL	6N	3_apomictic_facultative_sexual	1	1.55993	1	1	1	1	1	1	humid_meadow	46.5374	10.258	1947	-0.942876	-0.657647	4.42567	2.01978	-3.61304	-2.06614	-0.595631	-1.97753	-5.19164	-1.67168	-2.45868	-2.25146	-2.05976	-5.40604	-2.0711	1.87137	2.08432	1.22024	0.242017	2.12516	1.30011	2.28449	0.8018	8317	71	20	63	24
1	allemannii	10391	10391_G_02	10391_G_02_BL_01	garden	10391_2_BL_1_garden	BL	6N	3_apomictic_facultative_sexual	1	1.55993	1	1	1	1	1	1	humid_meadow	46.5374	10.258	1947	-0.942876	-0.657647	4.42567	2.01978	-3.61304	-2.06614	-0.595631	-1.97753	-5.19164	-1.67168	-2.45868	-2.25146	-2.05976	-5.40604	-2.0711	1.87137	2.08432	1.22024	0.242017	2.12516	1.30011	2.28449	0.8018	56	140	65	127	59
1	allemannii	10391	10391_G_02	10391_G_02_BL_03	garden	10391_2_BL_3_garden	BL	6N	3_apomictic_facultative_sexual	1	1.55993	1	1	1	1	1	1	humid_meadow	46.5374	10.258	1947	-0.942876	-0.657647	4.42567	2.01978	-3.61304	-2.06614	-0.595631	-1.97753	-5.19164	-1.67168	-2.45868	-2.25146	-2.05976	-5.40604	-2.0711	1.87137	2.08432	1.22024	0.242017	2.12516	1.30011	2.28449	0.8018	57	111	63	97	61
1	allemannii	10391	10391_G_02	10391_G_02_RT_01	garden	10391_2_1_garden	RT	6N	3_apomictic_facultative_sexual	1	1.55993	1	1	1	1	1	1	humid_meadow	46.5374	10.258	1947	-0.942876	-0.657647	4.42567	2.01978	-3.61304	-2.06614	-0.595631	-1.97753	-5.19164	-1.67168	-2.45868	-2.25146	-2.05976	-5.40604	-2.0711	1.87137	2.08432	1.22024	0.242017	2.12516	1.30011	2.28449	0.8018	4500	466	1256	390	1239
1	allemannii	10391	10391_G_02	10391_G_02_RT_01	garden	10391_2_1_garden	RT	6N	3_apomictic_facultative_sexual	1	1.55993	1	1	1	1	1	1	humid_meadow	46.5374	10.258	1947	-0.942876	-0.657647	4.42567	2.01978	-3.61304	-2.06614	-0.595631	-1.97753	-5.19164	-1.67168	-2.45868	-2.25146	-2.05976	-5.40604	-2.0711	1.87137	2.08432	1.22024	0.242017	2.12516	1.30011	2.28449	0.8018	4501	861	688	734	657
1	allemannii	10391	10391_G_02	10391_G_02_RT_02	garden	10391_2_2_garden	RT	6N	3_apomictic_facultative_sexual	1	1.55993	1	1	1	1	1	1	humid_meadow	46.5374	10.258	1947	-0.942876	-0.657647	4.42567	2.01978	-3.61304	-2.06614	-0.595631	-1.97753	-5.19164	-1.67168	-2.45868	-2.25146	-2.05976	-5.40604	-2.0711	1.87137	2.08432	1.22024	0.242017	2.12516	1.30011	2.28449	0.8018	4502	649	1313	584	1325
1	allemannii	10391	10391_G_02	10391_G_02_RT_02	garden	10391_2_2_garden	RT	6N	3_apomictic_facultative_sexual	1	1.55993	1	1	1	1	1	1	humid_meadow	46.5374	10.258	1947	-0.942876	-0.657647	4.42567	2.01978	-3.61304	-2.06614	-0.595631	-1.97753	-5.19164	-1.67168	-2.45868	-2.25146	-2.05976	-5.40604	-2.0711	1.87137	2.08432	1.22024	0.242017	2.12516	1.30011	2.28449	0.8018	4503	1185	792	1092	810
1	allemannii	10391	10391_G_03	10391_G_03_RT_01	garden	10391_3_1	RT	6N	3_apomictic_facultative_sexual	1	1.55993	1	1	1	1	1	1	humid_meadow	46.5374	10.258	1947	-0.942876	-0.657647	4.42567	2.01978	-3.61304	-2.06614	-0.595631	-1.97753	-5.19164	-1.67168	-2.45868	-2.25146	-2.05976	-5.40604	-2.0711	1.87137	2.08432	1.22024	0.242017	2.12516	1.30011	2.28449	0.8018	4504	1115	400	991	423
1	allemannii	10391	10391_G_03	10391_G_03_RT_02	garden	10391_3_2	RT	6N	3_apomictic_facultative_sexual	1	1.55993	1	1	1	1	1	1	humid_meadow	46.5374	10.258	1947	-0.942876	-0.657647	4.42567	2.01978	-3.61304	-2.06614	-0.595631	-1.97753	-5.19164	-1.67168	-2.45868	-2.25146	-2.05976	-5.40604	-2.0711	1.87137	2.08432	1.22024	0.242017	2.12516	1.30011	2.28449	0.8018	4505	936	696	770	722
1	allemannii	10391	10391_G_05	10391_G_05_BL_01	garden	10391_5_BL_1_garden	BL	6N	3_apomictic_facultative_sexual	1	1.55993	1	1	1	1	1	1	humid_meadow	46.5374	10.258	1947	-0.942876	-0.657647	4.42567	2.01978	-3.61304	-2.06614	-0.595631	-1.97753	-5.19164	-1.67168	-2.45868	-2.25146	-2.05976	-5.40604	-2.0711	1.87137	2.08432	1.22024	0.242017	2.12516	1.30011	2.28449	0.8018	58	303	96	273	100
1	allemannii	10391	10391_G_05	10391_G_05_BL_02	garden	10391_5_BL_2_garden	BL	6N	3_apomictic_facultative_sexual	1	1.55993	1	1	1	1	1	1	humid_meadow	46.5374	10.258	1947	-0.942876	-0.657647	4.42567	2.01978	-3.61304	-2.06614	-0.595631	-1.97753	-5.19164	-1.67168	-2.45868	-2.25146	-2.05976	-5.40604	-2.0711	1.87137	2.08432	1.22024	0.242017	2.12516	1.30011	2.28449	0.8018	59	231	173	208	176
1	allemannii	10391	10391_G_05	10391_G_05_BL_03	garden	10391_5_BL_3_garden	BL	6N	3_apomictic_facultative_sexual	1	1.55993	1	1	1	1	1	1	humid_meadow	46.5374	10.258	1947	-0.942876	-0.657647	4.42567	2.01978	-3.61304	-2.06614	-0.595631	-1.97753	-5.19164	-1.67168	-2.45868	-2.25146	-2.05976	-5.40604	-2.0711	1.87137	2.08432	1.22024	0.242017	2.12516	1.30011	2.28449	0.8018	60	382	155	347	153
1	allemannii	10391	10391_G_05	10391_G_05_RT_01	garden	10391_5_1	RT	6N	3_apomictic_facultative_sexual	1	1.55993	1	1	1	1	1	1	humid_meadow	46.5374	10.258	1947	-0.942876	-0.657647	4.42567	2.01978	-3.61304	-2.06614	-0.595631	-1.97753	-5.19164	-1.67168	-2.45868	-2.25146	-2.05976	-5.40604	-2.0711	1.87137	2.08432	1.22024	0.242017	2.12516	1.30011	2.28449	0.8018	4506	949	506	835	540
1	allemannii	10391	10391_G_05	10391_G_05_RT_02	garden	10391_5_2	RT	6N	3_apomictic_facultative_sexual	1	1.55993	1	1	1	1	1	1	humid_meadow	46.5374	10.258	1947	-0.942876	-0.657647	4.42567	2.01978	-3.61304	-2.06614	-0.595631	-1.97753	-5.19164	-1.67168	-2.45868	-2.25146	-2.05976	-5.40604	-2.0711	1.87137	2.08432	1.22024	0.242017	2.12516	1.30011	2.28449	0.8018	4507	1167	729	1087	711
1	allemannii	10391	10391_G_05	10391_G_05_SL_01	garden	10391_5_SL_1	SL	6N	3_apomictic_facultative_sexual	1	1.55993	1	1	1	1	1	1	humid_meadow	46.5374	10.258	1947	-0.942876	-0.657647	4.42567	2.01978	-3.61304	-2.06614	-0.595631	-1.97753	-5.19164	-1.67168	-2.45868	-2.25146	-2.05976	-5.40604	-2.0711	1.87137	2.08432	1.22024	0.242017	2.12516	1.30011	2.28449	0.8018	8318	51	29	38	28
1	allemannii	10391	10391_G_05	10391_G_05_SL_02	garden	10391_5_SL_2	SL	6N	3_apomictic_facultative_sexual	1	1.55993	1	1	1	1	1	1	humid_meadow	46.5374	10.258	1947	-0.942876	-0.657647	4.42567	2.01978	-3.61304	-2.06614	-0.595631	-1.97753	-5.19164	-1.67168	-2.45868	-2.25146	-2.05976	-5.40604	-2.0711	1.87137	2.08432	1.22024	0.242017	2.12516	1.30011	2.28449	0.8018	8319	81	25	68	25
1	allemannii	10391	10391_G_05	10391_G_05_SL_03	garden	10391_5_SL_3	SL	6N	3_apomictic_facultative_sexual	1	1.55993	1	1	1	1	1	1	humid_meadow	46.5374	10.258	1947	-0.942876	-0.657647	4.42567	2.01978	-3.61304	-2.06614	-0.595631	-1.97753	-5.19164	-1.67168	-2.45868	-2.25146	-2.05976	-5.40604	-2.0711	1.87137	2.08432	1.22024	0.242017	2.12516	1.30011	2.28449	0.8018	8320	81	18	61	11
1	allemannii	10391	10391_H_05	10391_H_05_BL_01	herbar	10391_5_BL_herbar	BL	6N	3_apomictic_facultative_sexual	1	1.55993	1	1	1	1	1	1	humid_meadow	46.5374	10.258	1947	-0.942876	-0.657647	4.42567	2.01978	-3.61304	-2.06614	-0.595631	-1.97753	-5.19164	-1.67168	-2.45868	-2.25146	-2.05976	-5.40604	-2.0711	1.87137	2.08432	1.22024	0.242017	2.12516	1.30011	2.28449	0.8018	61	441	245	413	255
1	allemannii	10391	10391_H_05	10391_H_05_RT_01	herbar	10391_5_herbar	RT	6N	3_apomictic_facultative_sexual	1	1.55993	1	1	1	1	1	1	humid_meadow	46.5374	10.258	1947	-0.942876	-0.657647	4.42567	2.01978	-3.61304	-2.06614	-0.595631	-1.97753	-5.19164	-1.67168	-2.45868	-2.25146	-2.05976	-5.40604	-2.0711	1.87137	2.08432	1.22024	0.242017	2.12516	1.30011	2.28449	0.8018	4508	589	1485	519	1481
1	allemannii	10391	10391_H_05	10391_H_05_SL_01	herbar	10391_5_SL_herbar	SL	6N	3_apomictic_facultative_sexual	1	1.55993	1	1	1	1	1	1	humid_meadow	46.5374	10.258	1947	-0.942876	-0.657647	4.42567	2.01978	-3.61304	-2.06614	-0.595631	-1.97753	-5.19164	-1.67168	-2.45868	-2.25146	-2.05976	-5.40604	-2.0711	1.87137	2.08432	1.22024	0.242017	2.12516	1.30011	2.28449	0.8018	8321	387	229	369	243
1	allemannii	10423	10423_G_01	10423_G_01_BL_01	garden	10423_1_BL_1_garden	BL	6N	2_apomictic_obligate_asexual	1	0.487954	2	1	1	1	1	1	streamside	46.4042	10.0666	1881	-0.967819	-0.68894	4.24854	1.95695	-2.8239	-1.51089	-0.343942	-1.67854	-4.04091	-1.31688	-1.8959	-1.67568	-1.64822	-4.28962	-1.58805	1.4385	1.87296	0.580677	0.821935	1.77591	0.647726	2.0785	0.20559	813	363	124	319	135
1	allemannii	10423	10423_G_01	10423_G_01_BL_02	garden	10423_1_BL_2_garden	BL	6N	2_apomictic_obligate_asexual	1	0.487954	2	1	1	1	1	1	streamside	46.4042	10.0666	1881	-0.967819	-0.68894	4.24854	1.95695	-2.8239	-1.51089	-0.343942	-1.67854	-4.04091	-1.31688	-1.8959	-1.67568	-1.64822	-4.28962	-1.58805	1.4385	1.87296	0.580677	0.821935	1.77591	0.647726	2.0785	0.20559	814	389	74	355	76
1	allemannii	10423	10423_G_01	10423_G_01_RT_01	garden	10423_1_1_garden	RT	6N	2_apomictic_obligate_asexual	1	0.487954	2	1	1	1	1	1	streamside	46.4042	10.0666	1881	-0.967819	-0.68894	4.24854	1.95695	-2.8239	-1.51089	-0.343942	-1.67854	-4.04091	-1.31688	-1.8959	-1.67568	-1.64822	-4.28962	-1.58805	1.4385	1.87296	0.580677	0.821935	1.77591	0.647726	2.0785	0.20559	5176	617	1218	540	1212
1	allemannii	10423	10423_G_01	10423_G_01_RT_02	garden	10423_1_1_garden	RT	6N	2_apomictic_obligate_asexual	1	0.487954	2	1	1	1	1	1	streamside	46.4042	10.0666	1881	-0.967819	-0.68894	4.24854	1.95695	-2.8239	-1.51089	-0.343942	-1.67854	-4.04091	-1.31688	-1.8959	-1.67568	-1.64822	-4.28962	-1.58805	1.4385	1.87296	0.580677	0.821935	1.77591	0.647726	2.0785	0.20559	5177	1123	641	1006	615
1	allemannii	10423	10423_G_01	10423_G_01_RT_03	garden	10423_1_2_garden	RT	6N	2_apomictic_obligate_asexual	1	0.487954	2	1	1	1	1	1	streamside	46.4042	10.0666	1881	-0.967819	-0.68894	4.24854	1.95695	-2.8239	-1.51089	-0.343942	-1.67854	-4.04091	-1.31688	-1.8959	-1.67568	-1.64822	-4.28962	-1.58805	1.4385	1.87296	0.580677	0.821935	1.77591	0.647726	2.0785	0.20559	5178	723	1364	665	1364
1	allemannii	10423	10423_G_01	10423_G_01_RT_04	garden	10423_1_2_garden	RT	6N	2_apomictic_obligate_asexual	1	0.487954	2	1	1	1	1	1	streamside	46.4042	10.0666	1881	-0.967819	-0.68894	4.24854	1.95695	-2.8239	-1.51089	-0.343942	-1.67854	-4.04091	-1.31688	-1.8959	-1.67568	-1.64822	-4.28962	-1.58805	1.4385	1.87296	0.580677	0.821935	1.77591	0.647726	2.0785	0.20559	5179	1331	877	1232	885
1	allemannii	10423	10423_G_01	10423_G_01_SL_01	garden	10423_1_SL_1	SL	6N	2_apomictic_obligate_asexual	1	0.487954	2	1	1	1	1	1	streamside	46.4042	10.0666	1881	-0.967819	-0.68894	4.24854	1.95695	-2.8239	-1.51089	-0.343942	-1.67854	-4.04091	-1.31688	-1.8959	-1.67568	-1.64822	-4.28962	-1.58805	1.4385	1.87296	0.580677	0.821935	1.77591	0.647726	2.0785	0.20559	9103	53	39	42	47
1	allemannii	10423	10423_G_01	10423_G_01_SL_02	garden	10423_1_SL_2	SL	6N	2_apomictic_obligate_asexual	1	0.487954	2	1	1	1	1	1	streamside	46.4042	10.0666	1881	-0.967819	-0.68894	4.24854	1.95695	-2.8239	-1.51089	-0.343942	-1.67854	-4.04091	-1.31688	-1.8959	-1.67568	-1.64822	-4.28962	-1.58805	1.4385	1.87296	0.580677	0.821935	1.77591	0.647726	2.0785	0.20559	9104	68	27	44	24
1	allemannii	10423	10423_G_02	10423_G_02_BL_01	garden	10423_02_BL_1_garden	BL	6N	2_apomictic_obligate_asexual	1	0.487954	2	1	1	1	1	1	streamside	46.4042	10.0666	1881	-0.967819	-0.68894	4.24854	1.95695	-2.8239	-1.51089	-0.343942	-1.67854	-4.04091	-1.31688	-1.8959	-1.67568	-1.64822	-4.28962	-1.58805	1.4385	1.87296	0.580677	0.821935	1.77591	0.647726	2.0785	0.20559	815	288	182	258	184
1	allemannii	10423	10423_G_02	10423_G_02_BL_02	garden	10423_02_BL_2_garden	BL	6N	2_apomictic_obligate_asexual	1	0.487954	2	1	1	1	1	1	streamside	46.4042	10.0666	1881	-0.967819	-0.68894	4.24854	1.95695	-2.8239	-1.51089	-0.343942	-1.67854	-4.04091	-1.31688	-1.8959	-1.67568	-1.64822	-4.28962	-1.58805	1.4385	1.87296	0.580677	0.821935	1.77591	0.647726	2.0785	0.20559	816	354	218	325	223
1	allemannii	10423	10423_G_02	10423_G_02_BL_03	garden	10423_02_BL_3_garden	BL	6N	2_apomictic_obligate_asexual	1	0.487954	2	1	1	1	1	1	streamside	46.4042	10.0666	1881	-0.967819	-0.68894	4.24854	1.95695	-2.8239	-1.51089	-0.343942	-1.67854	-4.04091	-1.31688	-1.8959	-1.67568	-1.64822	-4.28962	-1.58805	1.4385	1.87296	0.580677	0.821935	1.77591	0.647726	2.0785	0.20559	817	345	239	316	244
1	allemannii	10423	10423_G_02	10423_G_02_SL_01	garden	10423_02_SL_1	SL	6N	2_apomictic_obligate_asexual	1	0.487954	2	1	1	1	1	1	streamside	46.4042	10.0666	1881	-0.967819	-0.68894	4.24854	1.95695	-2.8239	-1.51089	-0.343942	-1.67854	-4.04091	-1.31688	-1.8959	-1.67568	-1.64822	-4.28962	-1.58805	1.4385	1.87296	0.580677	0.821935	1.77591	0.647726	2.0785	0.20559	9105	129	73	115	67
1	allemannii	10423	10423_G_02	10423_G_02_SL_02	garden	10423_02_SL_2	SL	6N	2_apomictic_obligate_asexual	1	0.487954	2	1	1	1	1	1	streamside	46.4042	10.0666	1881	-0.967819	-0.68894	4.24854	1.95695	-2.8239	-1.51089	-0.343942	-1.67854	-4.04091	-1.31688	-1.8959	-1.67568	-1.64822	-4.28962	-1.58805	1.4385	1.87296	0.580677	0.821935	1.77591	0.647726	2.0785	0.20559	9106	36	18	31	18
1	allemannii	10423	10423_G_03	10423_G_03_BL_01	garden	10423_3_BL_1_garden	BL	6N	2_apomictic_obligate_asexual	1	0.487954	2	1	1	1	1	1	streamside	46.4042	10.0666	1881	-0.967819	-0.68894	4.24854	1.95695	-2.8239	-1.51089	-0.343942	-1.67854	-4.04091	-1.31688	-1.8959	-1.67568	-1.64822	-4.28962	-1.58805	1.4385	1.87296	0.580677	0.821935	1.77591	0.647726	2.0785	0.20559	818	184	97	167	97
1	allemannii	10423	10423_G_03	10423_G_03_RT_01	garden	10423_3_1_garden	RT	6N	2_apomictic_obligate_asexual	1	0.487954	2	1	1	1	1	1	streamside	46.4042	10.0666	1881	-0.967819	-0.68894	4.24854	1.95695	-2.8239	-1.51089	-0.343942	-1.67854	-4.04091	-1.31688	-1.8959	-1.67568	-1.64822	-4.28962	-1.58805	1.4385	1.87296	0.580677	0.821935	1.77591	0.647726	2.0785	0.20559	5180	766	1200	738	1253
1	allemannii	10423	10423_G_03	10423_G_03_RT_02	garden	10423_3_1_garden	RT	6N	2_apomictic_obligate_asexual	1	0.487954	2	1	1	1	1	1	streamside	46.4042	10.0666	1881	-0.967819	-0.68894	4.24854	1.95695	-2.8239	-1.51089	-0.343942	-1.67854	-4.04091	-1.31688	-1.8959	-1.67568	-1.64822	-4.28962	-1.58805	1.4385	1.87296	0.580677	0.821935	1.77591	0.647726	2.0785	0.20559	5181	1411	584	1357	659
1	allemannii	10423	10423_G_03	10423_G_03_SL_01	garden	10423_3_SL_1	SL	6N	2_apomictic_obligate_asexual	1	0.487954	2	1	1	1	1	1	streamside	46.4042	10.0666	1881	-0.967819	-0.68894	4.24854	1.95695	-2.8239	-1.51089	-0.343942	-1.67854	-4.04091	-1.31688	-1.8959	-1.67568	-1.64822	-4.28962	-1.58805	1.4385	1.87296	0.580677	0.821935	1.77591	0.647726	2.0785	0.20559	9107	102	30	79	25
1	allemannii	10423	10423_G_04	10423_G_04_BL_01	garden	10423_4_BL_1_garden	BL	6N	2_apomictic_obligate_asexual	1	0.487954	2	1	1	1	1	1	streamside	46.4042	10.0666	1881	-0.967819	-0.68894	4.24854	1.95695	-2.8239	-1.51089	-0.343942	-1.67854	-4.04091	-1.31688	-1.8959	-1.67568	-1.64822	-4.28962	-1.58805	1.4385	1.87296	0.580677	0.821935	1.77591	0.647726	2.0785	0.20559	819	299	141	274	146
1	allemannii	10423	10423_G_04	10423_G_04_SL_01	garden	10423_4_SL_1	SL	6N	2_apomictic_obligate_asexual	1	0.487954	2	1	1	1	1	1	streamside	46.4042	10.0666	1881	-0.967819	-0.68894	4.24854	1.95695	-2.8239	-1.51089	-0.343942	-1.67854	-4.04091	-1.31688	-1.8959	-1.67568	-1.64822	-4.28962	-1.58805	1.4385	1.87296	0.580677	0.821935	1.77591	0.647726	2.0785	0.20559	9108	107	107	98	114
1	allemannii	10423	10423_G_04	10423_G_04_SL_02	garden	10423_4_SL_2	SL	6N	2_apomictic_obligate_asexual	1	0.487954	2	1	1	1	1	1	streamside	46.4042	10.0666	1881	-0.967819	-0.68894	4.24854	1.95695	-2.8239	-1.51089	-0.343942	-1.67854	-4.04091	-1.31688	-1.8959	-1.67568	-1.64822	-4.28962	-1.58805	1.4385	1.87296	0.580677	0.821935	1.77591	0.647726	2.0785	0.20559	9109	96	27	83	24
1	boldtii	10486	10486_G_01	10486_G_01_BL_01	garden	10486_1_BL_1_garden	BL	4N	2_apomictic_obligate_asexual	3	1.73144	1	1	1	NA	NA	NA	humid_forest	60.5389	24.2078	85	1.67859	1.62288	-0.5716	-1.36498	-1.64018	-0.585479	-1.60239	1.83987	-0.636681	-1.88457	1.60138	-0.281674	-1.05662	-0.764098	-1.86983	-0.511904	-0.409757	-0.769518	0.821935	-0.380349	-0.769527	-0.440964	-0.534533	262	481	251	448	277
1	boldtii	10486	10486_G_01	10486_G_01_BL_02	garden	10486_1_BL_2_garden	BL	4N	2_apomictic_obligate_asexual	3	1.73144	1	1	1	NA	NA	NA	humid_forest	60.5389	24.2078	85	1.67859	1.62288	-0.5716	-1.36498	-1.64018	-0.585479	-1.60239	1.83987	-0.636681	-1.88457	1.60138	-0.281674	-1.05662	-0.764098	-1.86983	-0.511904	-0.409757	-0.769518	0.821935	-0.380349	-0.769527	-0.440964	-0.534533	263	413	209	377	233
1	boldtii	10486	10486_G_01	10486_G_01_BL_03	garden	10486_1_BL_3_garden	BL	4N	2_apomictic_obligate_asexual	3	1.73144	1	1	1	NA	NA	NA	humid_forest	60.5389	24.2078	85	1.67859	1.62288	-0.5716	-1.36498	-1.64018	-0.585479	-1.60239	1.83987	-0.636681	-1.88457	1.60138	-0.281674	-1.05662	-0.764098	-1.86983	-0.511904	-0.409757	-0.769518	0.821935	-0.380349	-0.769527	-0.440964	-0.534533	264	343	154	310	167
1	boldtii	10486	10486_G_01	10486_G_01_RT_01	garden	10486_1_1	RT	4N	2_apomictic_obligate_asexual	3	1.73144	1	1	1	NA	NA	NA	humid_forest	60.5389	24.2078	85	1.67859	1.62288	-0.5716	-1.36498	-1.64018	-0.585479	-1.60239	1.83987	-0.636681	-1.88457	1.60138	-0.281674	-1.05662	-0.764098	-1.86983	-0.511904	-0.409757	-0.769518	0.821935	-0.380349	-0.769527	-0.440964	-0.534533	4689	927	496	776	493
1	boldtii	10486	10486_G_01	10486_G_01_RT_02	garden	10486_1_2	RT	4N	2_apomictic_obligate_asexual	3	1.73144	1	1	1	NA	NA	NA	humid_forest	60.5389	24.2078	85	1.67859	1.62288	-0.5716	-1.36498	-1.64018	-0.585479	-1.60239	1.83987	-0.636681	-1.88457	1.60138	-0.281674	-1.05662	-0.764098	-1.86983	-0.511904	-0.409757	-0.769518	0.821935	-0.380349	-0.769527	-0.440964	-0.534533	4690	1101	961	1007	936
1	boldtii	10486	10486_G_01	10486_G_01_SL_02	garden	10486_1_SL_2_garden	SL	4N	2_apomictic_obligate_asexual	3	1.73144	1	1	1	NA	NA	NA	humid_forest	60.5389	24.2078	85	1.67859	1.62288	-0.5716	-1.36498	-1.64018	-0.585479	-1.60239	1.83987	-0.636681	-1.88457	1.60138	-0.281674	-1.05662	-0.764098	-1.86983	-0.511904	-0.409757	-0.769518	0.821935	-0.380349	-0.769527	-0.440964	-0.534533	8544	393	255	380	246
1	boldtii	10486	10486_G_01	10486_G_01_SL_03	garden	10486_1_SL_3_garden	SL	4N	2_apomictic_obligate_asexual	3	1.73144	1	1	1	NA	NA	NA	humid_forest	60.5389	24.2078	85	1.67859	1.62288	-0.5716	-1.36498	-1.64018	-0.585479	-1.60239	1.83987	-0.636681	-1.88457	1.60138	-0.281674	-1.05662	-0.764098	-1.86983	-0.511904	-0.409757	-0.769518	0.821935	-0.380349	-0.769527	-0.440964	-0.534533	8545	255	161	249	167
1	boldtii	10486	10486_G_02	10486_G_02_BL_01	garden	10486_2_BL_1_garden	BL	4N	2_apomictic_obligate_asexual	3	1.73144	1	1	1	NA	NA	NA	humid_forest	60.5389	24.2078	85	1.67859	1.62288	-0.5716	-1.36498	-1.64018	-0.585479	-1.60239	1.83987	-0.636681	-1.88457	1.60138	-0.281674	-1.05662	-0.764098	-1.86983	-0.511904	-0.409757	-0.769518	0.821935	-0.380349	-0.769527	-0.440964	-0.534533	265	321	180	294	206
1	boldtii	10486	10486_G_02	10486_G_02_BL_02	garden	10486_2_BL_2_garden	BL	4N	2_apomictic_obligate_asexual	3	1.73144	1	1	1	NA	NA	NA	humid_forest	60.5389	24.2078	85	1.67859	1.62288	-0.5716	-1.36498	-1.64018	-0.585479	-1.60239	1.83987	-0.636681	-1.88457	1.60138	-0.281674	-1.05662	-0.764098	-1.86983	-0.511904	-0.409757	-0.769518	0.821935	-0.380349	-0.769527	-0.440964	-0.534533	266	409	179	378	191
1	boldtii	10486	10486_G_02	10486_G_02_RT_01	garden	10486_2_1_garden	RT	4N	2_apomictic_obligate_asexual	3	1.73144	1	1	1	NA	NA	NA	humid_forest	60.5389	24.2078	85	1.67859	1.62288	-0.5716	-1.36498	-1.64018	-0.585479	-1.60239	1.83987	-0.636681	-1.88457	1.60138	-0.281674	-1.05662	-0.764098	-1.86983	-0.511904	-0.409757	-0.769518	0.821935	-0.380349	-0.769527	-0.440964	-0.534533	4691	702	1098	618	1089
1	boldtii	10486	10486_G_02	10486_G_02_RT_01	garden	10486_2_1_garden	RT	4N	2_apomictic_obligate_asexual	3	1.73144	1	1	1	NA	NA	NA	humid_forest	60.5389	24.2078	85	1.67859	1.62288	-0.5716	-1.36498	-1.64018	-0.585479	-1.60239	1.83987	-0.636681	-1.88457	1.60138	-0.281674	-1.05662	-0.764098	-1.86983	-0.511904	-0.409757	-0.769518	0.821935	-0.380349	-0.769527	-0.440964	-0.534533	4692	1284	394	1138	391
1	boldtii	10486	10486_G_02	10486_G_02_RT_02	garden	10486_2_2_garden	RT	4N	2_apomictic_obligate_asexual	3	1.73144	1	1	1	NA	NA	NA	humid_forest	60.5389	24.2078	85	1.67859	1.62288	-0.5716	-1.36498	-1.64018	-0.585479	-1.60239	1.83987	-0.636681	-1.88457	1.60138	-0.281674	-1.05662	-0.764098	-1.86983	-0.511904	-0.409757	-0.769518	0.821935	-0.380349	-0.769527	-0.440964	-0.534533	4693	636	1106	551	1100
1	boldtii	10486	10486_G_02	10486_G_02_RT_02	garden	10486_2_2_garden	RT	4N	2_apomictic_obligate_asexual	3	1.73144	1	1	1	NA	NA	NA	humid_forest	60.5389	24.2078	85	1.67859	1.62288	-0.5716	-1.36498	-1.64018	-0.585479	-1.60239	1.83987	-0.636681	-1.88457	1.60138	-0.281674	-1.05662	-0.764098	-1.86983	-0.511904	-0.409757	-0.769518	0.821935	-0.380349	-0.769527	-0.440964	-0.534533	4694	1158	434	1013	394
1	boldtii	10486	10486_G_02	10486_G_02_SL_02	garden	10486_2_SL_2_garden	SL	4N	2_apomictic_obligate_asexual	3	1.73144	1	1	1	NA	NA	NA	humid_forest	60.5389	24.2078	85	1.67859	1.62288	-0.5716	-1.36498	-1.64018	-0.585479	-1.60239	1.83987	-0.636681	-1.88457	1.60138	-0.281674	-1.05662	-0.764098	-1.86983	-0.511904	-0.409757	-0.769518	0.821935	-0.380349	-0.769527	-0.440964	-0.534533	8546	212	147	189	142
1	boldtii	10486	10486_G_03	10486_G_03_BL_01	garden	10486_3_BL_1_garden	BL	4N	2_apomictic_obligate_asexual	3	1.73144	1	1	1	NA	NA	NA	humid_forest	60.5389	24.2078	85	1.67859	1.62288	-0.5716	-1.36498	-1.64018	-0.585479	-1.60239	1.83987	-0.636681	-1.88457	1.60138	-0.281674	-1.05662	-0.764098	-1.86983	-0.511904	-0.409757	-0.769518	0.821935	-0.380349	-0.769527	-0.440964	-0.534533	267	359	164	329	171
1	boldtii	10486	10486_G_03	10486_G_03_BL_02	garden	10486_3_BL_2_garden	BL	4N	2_apomictic_obligate_asexual	3	1.73144	1	1	1	NA	NA	NA	humid_forest	60.5389	24.2078	85	1.67859	1.62288	-0.5716	-1.36498	-1.64018	-0.585479	-1.60239	1.83987	-0.636681	-1.88457	1.60138	-0.281674	-1.05662	-0.764098	-1.86983	-0.511904	-0.409757	-0.769518	0.821935	-0.380349	-0.769527	-0.440964	-0.534533	268	493	280	467	315
1	boldtii	10486	10486_G_03	10486_G_03_RT_01	garden	10486_3(fragezeichen)_1_garden	RT	4N	2_apomictic_obligate_asexual	3	1.73144	1	1	1	NA	NA	NA	humid_forest	60.5389	24.2078	85	1.67859	1.62288	-0.5716	-1.36498	-1.64018	-0.585479	-1.60239	1.83987	-0.636681	-1.88457	1.60138	-0.281674	-1.05662	-0.764098	-1.86983	-0.511904	-0.409757	-0.769518	0.821935	-0.380349	-0.769527	-0.440964	-0.534533	4695	731	1239	669	1255
1	boldtii	10486	10486_G_03	10486_G_03_RT_01	garden	10486_3(fragezeichen)_1_garden	RT	4N	2_apomictic_obligate_asexual	3	1.73144	1	1	1	NA	NA	NA	humid_forest	60.5389	24.2078	85	1.67859	1.62288	-0.5716	-1.36498	-1.64018	-0.585479	-1.60239	1.83987	-0.636681	-1.88457	1.60138	-0.281674	-1.05662	-0.764098	-1.86983	-0.511904	-0.409757	-0.769518	0.821935	-0.380349	-0.769527	-0.440964	-0.534533	4696	1341	667	1237	680
1	boldtii	10486	10486_G_03	10486_G_03_RT_02	garden	10486_3(fragezeichen)_2_garden	RT	4N	2_apomictic_obligate_asexual	3	1.73144	1	1	1	NA	NA	NA	humid_forest	60.5389	24.2078	85	1.67859	1.62288	-0.5716	-1.36498	-1.64018	-0.585479	-1.60239	1.83987	-0.636681	-1.88457	1.60138	-0.281674	-1.05662	-0.764098	-1.86983	-0.511904	-0.409757	-0.769518	0.821935	-0.380349	-0.769527	-0.440964	-0.534533	4697	837	1063	776	1005
1	boldtii	10486	10486_G_03	10486_G_03_RT_02	garden	10486_3(fragezeichen)_2_garden	RT	4N	2_apomictic_obligate_asexual	3	1.73144	1	1	1	NA	NA	NA	humid_forest	60.5389	24.2078	85	1.67859	1.62288	-0.5716	-1.36498	-1.64018	-0.585479	-1.60239	1.83987	-0.636681	-1.88457	1.60138	-0.281674	-1.05662	-0.764098	-1.86983	-0.511904	-0.409757	-0.769518	0.821935	-0.380349	-0.769527	-0.440964	-0.534533	4698	1556	333	1455	221
1	boldtii	10486	10486_G_03	10486_G_03_SL_01	garden	10486_3_SL_1_garden	SL	4N	2_apomictic_obligate_asexual	3	1.73144	1	1	1	NA	NA	NA	humid_forest	60.5389	24.2078	85	1.67859	1.62288	-0.5716	-1.36498	-1.64018	-0.585479	-1.60239	1.83987	-0.636681	-1.88457	1.60138	-0.281674	-1.05662	-0.764098	-1.86983	-0.511904	-0.409757	-0.769518	0.821935	-0.380349	-0.769527	-0.440964	-0.534533	8547	407	106	392	109
1	boldtii	10486	10486_G_03	10486_G_03_SL_02	garden	10486_3_SL_2_garden	SL	4N	2_apomictic_obligate_asexual	3	1.73144	1	1	1	NA	NA	NA	humid_forest	60.5389	24.2078	85	1.67859	1.62288	-0.5716	-1.36498	-1.64018	-0.585479	-1.60239	1.83987	-0.636681	-1.88457	1.60138	-0.281674	-1.05662	-0.764098	-1.86983	-0.511904	-0.409757	-0.769518	0.821935	-0.380349	-0.769527	-0.440964	-0.534533	8548	223	104	214	111
1	boldtii	10486	10486_G_03	10486_G_03_SL_03	garden	10486_3_SL_3_garden	SL	4N	2_apomictic_obligate_asexual	3	1.73144	1	1	1	NA	NA	NA	humid_forest	60.5389	24.2078	85	1.67859	1.62288	-0.5716	-1.36498	-1.64018	-0.585479	-1.60239	1.83987	-0.636681	-1.88457	1.60138	-0.281674	-1.05662	-0.764098	-1.86983	-0.511904	-0.409757	-0.769518	0.821935	-0.380349	-0.769527	-0.440964	-0.534533	8549	203	173	189	172
1	boldtii	10486	10486_G_04	10486_G_04_BL_01	garden	10486_4_BL_1_garden	BL	4N	2_apomictic_obligate_asexual	3	1.73144	1	1	1	NA	NA	NA	humid_forest	60.5389	24.2078	85	1.67859	1.62288	-0.5716	-1.36498	-1.64018	-0.585479	-1.60239	1.83987	-0.636681	-1.88457	1.60138	-0.281674	-1.05662	-0.764098	-1.86983	-0.511904	-0.409757	-0.769518	0.821935	-0.380349	-0.769527	-0.440964	-0.534533	269	443	209	414	230
1	boldtii	10486	10486_G_04	10486_G_04_BL_02	garden	10486_4_BL_2_garden	BL	4N	2_apomictic_obligate_asexual	3	1.73144	1	1	1	NA	NA	NA	humid_forest	60.5389	24.2078	85	1.67859	1.62288	-0.5716	-1.36498	-1.64018	-0.585479	-1.60239	1.83987	-0.636681	-1.88457	1.60138	-0.281674	-1.05662	-0.764098	-1.86983	-0.511904	-0.409757	-0.769518	0.821935	-0.380349	-0.769527	-0.440964	-0.534533	270	424	191	393	212
1	boldtii	10486	10486_G_04	10486_G_04_BL_03	garden	10486_4_BL_3_garden	BL	4N	2_apomictic_obligate_asexual	3	1.73144	1	1	1	NA	NA	NA	humid_forest	60.5389	24.2078	85	1.67859	1.62288	-0.5716	-1.36498	-1.64018	-0.585479	-1.60239	1.83987	-0.636681	-1.88457	1.60138	-0.281674	-1.05662	-0.764098	-1.86983	-0.511904	-0.409757	-0.769518	0.821935	-0.380349	-0.769527	-0.440964	-0.534533	271	456	215	425	241
1	boldtii	10486	10486_G_04	10486_G_04_RT_01	garden	10486_4_1_garden	RT	4N	2_apomictic_obligate_asexual	3	1.73144	1	1	1	NA	NA	NA	humid_forest	60.5389	24.2078	85	1.67859	1.62288	-0.5716	-1.36498	-1.64018	-0.585479	-1.60239	1.83987	-0.636681	-1.88457	1.60138	-0.281674	-1.05662	-0.764098	-1.86983	-0.511904	-0.409757	-0.769518	0.821935	-0.380349	-0.769527	-0.440964	-0.534533	4699	615	1275	549	1273
1	boldtii	10486	10486_G_04	10486_G_04_RT_01	garden	10486_4_1_garden	RT	4N	2_apomictic_obligate_asexual	3	1.73144	1	1	1	NA	NA	NA	humid_forest	60.5389	24.2078	85	1.67859	1.62288	-0.5716	-1.36498	-1.64018	-0.585479	-1.60239	1.83987	-0.636681	-1.88457	1.60138	-0.281674	-1.05662	-0.764098	-1.86983	-0.511904	-0.409757	-0.769518	0.821935	-0.380349	-0.769527	-0.440964	-0.534533	4700	1123	729	1030	696
1	boldtii	10486	10486_G_04	10486_G_04_RT_02	garden	10486_4_2_garden	RT	4N	2_apomictic_obligate_asexual	3	1.73144	1	1	1	NA	NA	NA	humid_forest	60.5389	24.2078	85	1.67859	1.62288	-0.5716	-1.36498	-1.64018	-0.585479	-1.60239	1.83987	-0.636681	-1.88457	1.60138	-0.281674	-1.05662	-0.764098	-1.86983	-0.511904	-0.409757	-0.769518	0.821935	-0.380349	-0.769527	-0.440964	-0.534533	4701	683	1034	613	1013
1	boldtii	10486	10486_G_04	10486_G_04_RT_02	garden	10486_4_2_garden	RT	4N	2_apomictic_obligate_asexual	3	1.73144	1	1	1	NA	NA	NA	humid_forest	60.5389	24.2078	85	1.67859	1.62288	-0.5716	-1.36498	-1.64018	-0.585479	-1.60239	1.83987	-0.636681	-1.88457	1.60138	-0.281674	-1.05662	-0.764098	-1.86983	-0.511904	-0.409757	-0.769518	0.821935	-0.380349	-0.769527	-0.440964	-0.534533	4702	1253	281	1139	234
1	boldtii	10486	10486_G_04	10486_G_04_SL_01	garden	10486_4_SL_1_garden	SL	4N	2_apomictic_obligate_asexual	3	1.73144	1	1	1	NA	NA	NA	humid_forest	60.5389	24.2078	85	1.67859	1.62288	-0.5716	-1.36498	-1.64018	-0.585479	-1.60239	1.83987	-0.636681	-1.88457	1.60138	-0.281674	-1.05662	-0.764098	-1.86983	-0.511904	-0.409757	-0.769518	0.821935	-0.380349	-0.769527	-0.440964	-0.534533	8550	243	140	227	133
1	boldtii	10486	10486_G_04	10486_G_04_SL_02	garden	10486_4_SL_2_garden	SL	4N	2_apomictic_obligate_asexual	3	1.73144	1	1	1	NA	NA	NA	humid_forest	60.5389	24.2078	85	1.67859	1.62288	-0.5716	-1.36498	-1.64018	-0.585479	-1.60239	1.83987	-0.636681	-1.88457	1.60138	-0.281674	-1.05662	-0.764098	-1.86983	-0.511904	-0.409757	-0.769518	0.821935	-0.380349	-0.769527	-0.440964	-0.534533	8551	253	89	240	85
1	boldtii	10486	10486_G_04	10486_G_04_SL_03	garden	10486_4_SL_3_garden	SL	4N	2_apomictic_obligate_asexual	3	1.73144	1	1	1	NA	NA	NA	humid_forest	60.5389	24.2078	85	1.67859	1.62288	-0.5716	-1.36498	-1.64018	-0.585479	-1.60239	1.83987	-0.636681	-1.88457	1.60138	-0.281674	-1.05662	-0.764098	-1.86983	-0.511904	-0.409757	-0.769518	0.821935	-0.380349	-0.769527	-0.440964	-0.534533	8552	289	68	281	63
1	boldtii	10486	10486_G_05	10486_G_05_BL_01	garden	10486_5_BL_1_garden	BL	4N	2_apomictic_obligate_asexual	3	1.73144	1	1	1	NA	NA	NA	humid_forest	60.5389	24.2078	85	1.67859	1.62288	-0.5716	-1.36498	-1.64018	-0.585479	-1.60239	1.83987	-0.636681	-1.88457	1.60138	-0.281674	-1.05662	-0.764098	-1.86983	-0.511904	-0.409757	-0.769518	0.821935	-0.380349	-0.769527	-0.440964	-0.534533	272	486	103	454	139
1	boldtii	10486	10486_G_05	10486_G_05_BL_02	garden	10486_5_BL_2_garden	BL	4N	2_apomictic_obligate_asexual	3	1.73144	1	1	1	NA	NA	NA	humid_forest	60.5389	24.2078	85	1.67859	1.62288	-0.5716	-1.36498	-1.64018	-0.585479	-1.60239	1.83987	-0.636681	-1.88457	1.60138	-0.281674	-1.05662	-0.764098	-1.86983	-0.511904	-0.409757	-0.769518	0.821935	-0.380349	-0.769527	-0.440964	-0.534533	273	393	189	374	214
1	boldtii	10486	10486_G_05	10486_G_05_RT_01	garden	10486_5_1_garden	RT	4N	2_apomictic_obligate_asexual	3	1.73144	1	1	1	NA	NA	NA	humid_forest	60.5389	24.2078	85	1.67859	1.62288	-0.5716	-1.36498	-1.64018	-0.585479	-1.60239	1.83987	-0.636681	-1.88457	1.60138	-0.281674	-1.05662	-0.764098	-1.86983	-0.511904	-0.409757	-0.769518	0.821935	-0.380349	-0.769527	-0.440964	-0.534533	4703	651	1151	597	1154
1	boldtii	10486	10486_G_05	10486_G_05_RT_01	garden	10486_5_1_garden	RT	4N	2_apomictic_obligate_asexual	3	1.73144	1	1	1	NA	NA	NA	humid_forest	60.5389	24.2078	85	1.67859	1.62288	-0.5716	-1.36498	-1.64018	-0.585479	-1.60239	1.83987	-0.636681	-1.88457	1.60138	-0.281674	-1.05662	-0.764098	-1.86983	-0.511904	-0.409757	-0.769518	0.821935	-0.380349	-0.769527	-0.440964	-0.534533	4704	1203	486	1113	499
1	boldtii	10486	10486_G_05	10486_G_05_RT_02	garden	10486_5_2_garden	RT	4N	2_apomictic_obligate_asexual	3	1.73144	1	1	1	NA	NA	NA	humid_forest	60.5389	24.2078	85	1.67859	1.62288	-0.5716	-1.36498	-1.64018	-0.585479	-1.60239	1.83987	-0.636681	-1.88457	1.60138	-0.281674	-1.05662	-0.764098	-1.86983	-0.511904	-0.409757	-0.769518	0.821935	-0.380349	-0.769527	-0.440964	-0.534533	4705	761	1166	672	1164
1	boldtii	10486	10486_G_05	10486_G_05_RT_02	garden	10486_5_2_garden	RT	4N	2_apomictic_obligate_asexual	3	1.73144	1	1	1	NA	NA	NA	humid_forest	60.5389	24.2078	85	1.67859	1.62288	-0.5716	-1.36498	-1.64018	-0.585479	-1.60239	1.83987	-0.636681	-1.88457	1.60138	-0.281674	-1.05662	-0.764098	-1.86983	-0.511904	-0.409757	-0.769518	0.821935	-0.380349	-0.769527	-0.440964	-0.534533	4706	1398	527	1274	475
1	boldtii	10486	10486_G_05	10486_G_05_SL_01	garden	10486_5_SL_1_garden	SL	4N	2_apomictic_obligate_asexual	3	1.73144	1	1	1	NA	NA	NA	humid_forest	60.5389	24.2078	85	1.67859	1.62288	-0.5716	-1.36498	-1.64018	-0.585479	-1.60239	1.83987	-0.636681	-1.88457	1.60138	-0.281674	-1.05662	-0.764098	-1.86983	-0.511904	-0.409757	-0.769518	0.821935	-0.380349	-0.769527	-0.440964	-0.534533	8553	162	57	147	62
1	boldtii	10486	10486_G_05	10486_G_05_SL_02	garden	10486_5_SL_2_garden	SL	4N	2_apomictic_obligate_asexual	3	1.73144	1	1	1	NA	NA	NA	humid_forest	60.5389	24.2078	85	1.67859	1.62288	-0.5716	-1.36498	-1.64018	-0.585479	-1.60239	1.83987	-0.636681	-1.88457	1.60138	-0.281674	-1.05662	-0.764098	-1.86983	-0.511904	-0.409757	-0.769518	0.821935	-0.380349	-0.769527	-0.440964	-0.534533	8554	268	117	255	126
1	boldtii	10486	10486_G_05	10486_G_05_SL_03	garden	10486_5_SL_3_garden	SL	4N	2_apomictic_obligate_asexual	3	1.73144	1	1	1	NA	NA	NA	humid_forest	60.5389	24.2078	85	1.67859	1.62288	-0.5716	-1.36498	-1.64018	-0.585479	-1.60239	1.83987	-0.636681	-1.88457	1.60138	-0.281674	-1.05662	-0.764098	-1.86983	-0.511904	-0.409757	-0.769518	0.821935	-0.380349	-0.769527	-0.440964	-0.534533	8555	270	111	250	108
1	boldtii	10486	10486_G_06	10486_G_06_BL_01	garden	10486_6_BL_1_garden	BL	4N	2_apomictic_obligate_asexual	3	1.73144	1	1	1	NA	NA	NA	humid_forest	60.5389	24.2078	85	1.67859	1.62288	-0.5716	-1.36498	-1.64018	-0.585479	-1.60239	1.83987	-0.636681	-1.88457	1.60138	-0.281674	-1.05662	-0.764098	-1.86983	-0.511904	-0.409757	-0.769518	0.821935	-0.380349	-0.769527	-0.440964	-0.534533	274	449	231	419	249
1	boldtii	10486	10486_G_06	10486_G_06_BL_02	garden	10486_6_BL_2_garden	BL	4N	2_apomictic_obligate_asexual	3	1.73144	1	1	1	NA	NA	NA	humid_forest	60.5389	24.2078	85	1.67859	1.62288	-0.5716	-1.36498	-1.64018	-0.585479	-1.60239	1.83987	-0.636681	-1.88457	1.60138	-0.281674	-1.05662	-0.764098	-1.86983	-0.511904	-0.409757	-0.769518	0.821935	-0.380349	-0.769527	-0.440964	-0.534533	275	522	272	502	302
1	boldtii	10486	10486_G_06	10486_G_06_BL_03	garden	10486_6_BL_3_garden	BL	4N	2_apomictic_obligate_asexual	3	1.73144	1	1	1	NA	NA	NA	humid_forest	60.5389	24.2078	85	1.67859	1.62288	-0.5716	-1.36498	-1.64018	-0.585479	-1.60239	1.83987	-0.636681	-1.88457	1.60138	-0.281674	-1.05662	-0.764098	-1.86983	-0.511904	-0.409757	-0.769518	0.821935	-0.380349	-0.769527	-0.440964	-0.534533	276	501	274	470	295
1	boldtii	10486	10486_G_06	10486_G_06_RT_01	garden	10486_6_1_garden	RT	4N	2_apomictic_obligate_asexual	3	1.73144	1	1	1	NA	NA	NA	humid_forest	60.5389	24.2078	85	1.67859	1.62288	-0.5716	-1.36498	-1.64018	-0.585479	-1.60239	1.83987	-0.636681	-1.88457	1.60138	-0.281674	-1.05662	-0.764098	-1.86983	-0.511904	-0.409757	-0.769518	0.821935	-0.380349	-0.769527	-0.440964	-0.534533	4707	608	1101	525	1099
1	boldtii	10486	10486_G_06	10486_G_06_RT_01	garden	10486_6_1_garden	RT	4N	2_apomictic_obligate_asexual	3	1.73144	1	1	1	NA	NA	NA	humid_forest	60.5389	24.2078	85	1.67859	1.62288	-0.5716	-1.36498	-1.64018	-0.585479	-1.60239	1.83987	-0.636681	-1.88457	1.60138	-0.281674	-1.05662	-0.764098	-1.86983	-0.511904	-0.409757	-0.769518	0.821935	-0.380349	-0.769527	-0.440964	-0.534533	4708	1108	429	967	408
1	boldtii	10486	10486_G_06	10486_G_06_RT_02	garden	10486_6_2_garden	RT	4N	2_apomictic_obligate_asexual	3	1.73144	1	1	1	NA	NA	NA	humid_forest	60.5389	24.2078	85	1.67859	1.62288	-0.5716	-1.36498	-1.64018	-0.585479	-1.60239	1.83987	-0.636681	-1.88457	1.60138	-0.281674	-1.05662	-0.764098	-1.86983	-0.511904	-0.409757	-0.769518	0.821935	-0.380349	-0.769527	-0.440964	-0.534533	4709	813	1005	734	1010
1	boldtii	10486	10486_G_06	10486_G_06_RT_02	garden	10486_6_2_garden	RT	4N	2_apomictic_obligate_asexual	3	1.73144	1	1	1	NA	NA	NA	humid_forest	60.5389	24.2078	85	1.67859	1.62288	-0.5716	-1.36498	-1.64018	-0.585479	-1.60239	1.83987	-0.636681	-1.88457	1.60138	-0.281674	-1.05662	-0.764098	-1.86983	-0.511904	-0.409757	-0.769518	0.821935	-0.380349	-0.769527	-0.440964	-0.534533	4710	1478	229	1346	231
1	boldtii	10486	10486_G_06	10486_G_06_SL_01	garden	10486_6_SL_1_garden	SL	4N	2_apomictic_obligate_asexual	3	1.73144	1	1	1	NA	NA	NA	humid_forest	60.5389	24.2078	85	1.67859	1.62288	-0.5716	-1.36498	-1.64018	-0.585479	-1.60239	1.83987	-0.636681	-1.88457	1.60138	-0.281674	-1.05662	-0.764098	-1.86983	-0.511904	-0.409757	-0.769518	0.821935	-0.380349	-0.769527	-0.440964	-0.534533	8556	378	148	369	159
1	boldtii	10486	10486_G_06	10486_G_06_SL_02	garden	10486_6_SL_2_garden	SL	4N	2_apomictic_obligate_asexual	3	1.73144	1	1	1	NA	NA	NA	humid_forest	60.5389	24.2078	85	1.67859	1.62288	-0.5716	-1.36498	-1.64018	-0.585479	-1.60239	1.83987	-0.636681	-1.88457	1.60138	-0.281674	-1.05662	-0.764098	-1.86983	-0.511904	-0.409757	-0.769518	0.821935	-0.380349	-0.769527	-0.440964	-0.534533	8557	241	129	228	127
1	boldtii	10486	10486_G_06	10486_G_06_SL_03	garden	10486_6_SL_3_garden	SL	4N	2_apomictic_obligate_asexual	3	1.73144	1	1	1	NA	NA	NA	humid_forest	60.5389	24.2078	85	1.67859	1.62288	-0.5716	-1.36498	-1.64018	-0.585479	-1.60239	1.83987	-0.636681	-1.88457	1.60138	-0.281674	-1.05662	-0.764098	-1.86983	-0.511904	-0.409757	-0.769518	0.821935	-0.380349	-0.769527	-0.440964	-0.534533	8558	139	101	127	113
1	boldtii	10486	10486_H_07	10486_H_07_BL_01	herbar	10486_7_BL_herbar	BL	4N	2_apomictic_obligate_asexual	3	1.73144	1	1	1	NA	NA	NA	humid_forest	60.5389	24.2078	85	1.67859	1.62288	-0.5716	-1.36498	-1.64018	-0.585479	-1.60239	1.83987	-0.636681	-1.88457	1.60138	-0.281674	-1.05662	-0.764098	-1.86983	-0.511904	-0.409757	-0.769518	0.821935	-0.380349	-0.769527	-0.440964	-0.534533	277	854	502	811	528
1	boldtii	10486	10486_H_07	10486_H_07_SL_01	herbar	10486_7_SL_herbar	SL	4N	2_apomictic_obligate_asexual	3	1.73144	1	1	1	NA	NA	NA	humid_forest	60.5389	24.2078	85	1.67859	1.62288	-0.5716	-1.36498	-1.64018	-0.585479	-1.60239	1.83987	-0.636681	-1.88457	1.60138	-0.281674	-1.05662	-0.764098	-1.86983	-0.511904	-0.409757	-0.769518	0.821935	-0.380349	-0.769527	-0.440964	-0.534533	8559	1052	921	1049	927
1	boldtii	10486	10486_H_09	10486_H_09_BL_01	herbar	10486_9_BL_herbar	BL	4N	2_apomictic_obligate_asexual	3	1.73144	1	1	1	NA	NA	NA	humid_forest	60.5389	24.2078	85	1.67859	1.62288	-0.5716	-1.36498	-1.64018	-0.585479	-1.60239	1.83987	-0.636681	-1.88457	1.60138	-0.281674	-1.05662	-0.764098	-1.86983	-0.511904	-0.409757	-0.769518	0.821935	-0.380349	-0.769527	-0.440964	-0.534533	278	808	483	764	500
1	boldtii	10486	10486_H_09	10486_H_09_RT_01	herbar	10486_9_herbar	RT	4N	2_apomictic_obligate_asexual	3	1.73144	1	1	1	NA	NA	NA	humid_forest	60.5389	24.2078	85	1.67859	1.62288	-0.5716	-1.36498	-1.64018	-0.585479	-1.60239	1.83987	-0.636681	-1.88457	1.60138	-0.281674	-1.05662	-0.764098	-1.86983	-0.511904	-0.409757	-0.769518	0.821935	-0.380349	-0.769527	-0.440964	-0.534533	4711	559	1240	481	1225
1	boldtii	10486	10486_H_09	10486_H_09_SL_01	herbar	10486_9_SL_herbar	SL	4N	2_apomictic_obligate_asexual	3	1.73144	1	1	1	NA	NA	NA	humid_forest	60.5389	24.2078	85	1.67859	1.62288	-0.5716	-1.36498	-1.64018	-0.585479	-1.60239	1.83987	-0.636681	-1.88457	1.60138	-0.281674	-1.05662	-0.764098	-1.86983	-0.511904	-0.409757	-0.769518	0.821935	-0.380349	-0.769527	-0.440964	-0.534533	8560	555	735	542	751
1	boldtii	10486	10486_H_11	10486_H_11_BL_01	herbar	10486_11_BL_herbar	BL	4N	2_apomictic_obligate_asexual	3	1.73144	1	1	1	NA	NA	NA	humid_forest	60.5389	24.2078	85	1.67859	1.62288	-0.5716	-1.36498	-1.64018	-0.585479	-1.60239	1.83987	-0.636681	-1.88457	1.60138	-0.281674	-1.05662	-0.764098	-1.86983	-0.511904	-0.409757	-0.769518	0.821935	-0.380349	-0.769527	-0.440964	-0.534533	279	912	601	865	627
1	boldtii	10486	10486_H_11	10486_H_11_RT_01	herbar	10486_11_herbar	RT	4N	2_apomictic_obligate_asexual	3	1.73144	1	1	1	NA	NA	NA	humid_forest	60.5389	24.2078	85	1.67859	1.62288	-0.5716	-1.36498	-1.64018	-0.585479	-1.60239	1.83987	-0.636681	-1.88457	1.60138	-0.281674	-1.05662	-0.764098	-1.86983	-0.511904	-0.409757	-0.769518	0.821935	-0.380349	-0.769527	-0.440964	-0.534533	4712	726	1044	657	1028
1	boldtii	10486	10486_H_11	10486_H_11_SL_01	herbar	10486_11_SL_herbar	SL	4N	2_apomictic_obligate_asexual	3	1.73144	1	1	1	NA	NA	NA	humid_forest	60.5389	24.2078	85	1.67859	1.62288	-0.5716	-1.36498	-1.64018	-0.585479	-1.60239	1.83987	-0.636681	-1.88457	1.60138	-0.281674	-1.05662	-0.764098	-1.86983	-0.511904	-0.409757	-0.769518	0.821935	-0.380349	-0.769527	-0.440964	-0.534533	8561	1246	886	1238	871
1	cassubicifolius	10447	10447_G_01	10447_G_01_BL_01	garden	10447_1_BL_1_garden	BL	4N	2_apomictic_obligate_asexual	0	1.21355	1	1	1	NA	NA	NA	marshy_forest	48.3119	10.8479	500	-0.610641	-0.561207	0.542185	0.242311	0.234031	0.247391	0.411126	-0.230367	0.0825221	0.244264	-0.20756	0.566849	-0.259263	0.0585247	0.18315	0.667295	1.02751	0.65174	0.676956	1.09259	0.467757	1.36544	0.164472	62	381	132	361	150
1	cassubicifolius	10447	10447_G_01	10447_G_01_BL_02	garden	10447_1_BL_2_garden	BL	4N	2_apomictic_obligate_asexual	0	1.21355	1	1	1	NA	NA	NA	marshy_forest	48.3119	10.8479	500	-0.610641	-0.561207	0.542185	0.242311	0.234031	0.247391	0.411126	-0.230367	0.0825221	0.244264	-0.20756	0.566849	-0.259263	0.0585247	0.18315	0.667295	1.02751	0.65174	0.676956	1.09259	0.467757	1.36544	0.164472	63	320	115	296	137
1	cassubicifolius	10447	10447_G_01	10447_G_01_BL_03	garden	10447_1_BL_3_garden	BL	4N	2_apomictic_obligate_asexual	0	1.21355	1	1	1	NA	NA	NA	marshy_forest	48.3119	10.8479	500	-0.610641	-0.561207	0.542185	0.242311	0.234031	0.247391	0.411126	-0.230367	0.0825221	0.244264	-0.20756	0.566849	-0.259263	0.0585247	0.18315	0.667295	1.02751	0.65174	0.676956	1.09259	0.467757	1.36544	0.164472	64	405	132	375	145
1	cassubicifolius	10447	10447_G_01	10447_G_01_RT_01	garden	10447_1_1_garden	RT	4N	2_apomictic_obligate_asexual	0	1.21355	1	1	1	NA	NA	NA	marshy_forest	48.3119	10.8479	500	-0.610641	-0.561207	0.542185	0.242311	0.234031	0.247391	0.411126	-0.230367	0.0825221	0.244264	-0.20756	0.566849	-0.259263	0.0585247	0.18315	0.667295	1.02751	0.65174	0.676956	1.09259	0.467757	1.36544	0.164472	4509	1277	238	1130	200
1	cassubicifolius	10447	10447_G_01	10447_G_01_RT_02	garden	10447_1_2_garden	RT	4N	2_apomictic_obligate_asexual	0	1.21355	1	1	1	NA	NA	NA	marshy_forest	48.3119	10.8479	500	-0.610641	-0.561207	0.542185	0.242311	0.234031	0.247391	0.411126	-0.230367	0.0825221	0.244264	-0.20756	0.566849	-0.259263	0.0585247	0.18315	0.667295	1.02751	0.65174	0.676956	1.09259	0.467757	1.36544	0.164472	4510	1193	545	1029	539
1	cassubicifolius	10447	10447_G_01	10447_G_01_SL_01	garden	10447_1_SL_1_garden	SL	4N	2_apomictic_obligate_asexual	0	1.21355	1	1	1	NA	NA	NA	marshy_forest	48.3119	10.8479	500	-0.610641	-0.561207	0.542185	0.242311	0.234031	0.247391	0.411126	-0.230367	0.0825221	0.244264	-0.20756	0.566849	-0.259263	0.0585247	0.18315	0.667295	1.02751	0.65174	0.676956	1.09259	0.467757	1.36544	0.164472	8322	185	132	168	144
1	cassubicifolius	10447	10447_G_01	10447_G_01_SL_02	garden	10447_1_SL_2_garden	SL	4N	2_apomictic_obligate_asexual	0	1.21355	1	1	1	NA	NA	NA	marshy_forest	48.3119	10.8479	500	-0.610641	-0.561207	0.542185	0.242311	0.234031	0.247391	0.411126	-0.230367	0.0825221	0.244264	-0.20756	0.566849	-0.259263	0.0585247	0.18315	0.667295	1.02751	0.65174	0.676956	1.09259	0.467757	1.36544	0.164472	8323	221	126	199	119
1	cassubicifolius	10447	10447_G_01	10447_G_01_SL_03	garden	10447_1_SL_3_garden	SL	4N	2_apomictic_obligate_asexual	0	1.21355	1	1	1	NA	NA	NA	marshy_forest	48.3119	10.8479	500	-0.610641	-0.561207	0.542185	0.242311	0.234031	0.247391	0.411126	-0.230367	0.0825221	0.244264	-0.20756	0.566849	-0.259263	0.0585247	0.18315	0.667295	1.02751	0.65174	0.676956	1.09259	0.467757	1.36544	0.164472	8324	165	120	146	118
1	cassubicifolius	10447	10447_G_02	10447_G_02_BL_01	garden	10447_2_BL_1_garden	BL	4N	2_apomictic_obligate_asexual	0	1.21355	1	1	1	NA	NA	NA	marshy_forest	48.3119	10.8479	500	-0.610641	-0.561207	0.542185	0.242311	0.234031	0.247391	0.411126	-0.230367	0.0825221	0.244264	-0.20756	0.566849	-0.259263	0.0585247	0.18315	0.667295	1.02751	0.65174	0.676956	1.09259	0.467757	1.36544	0.164472	65	388	223	367	235
1	cassubicifolius	10447	10447_G_02	10447_G_02_BL_02	garden	10447_2_BL_2_garden	BL	4N	2_apomictic_obligate_asexual	0	1.21355	1	1	1	NA	NA	NA	marshy_forest	48.3119	10.8479	500	-0.610641	-0.561207	0.542185	0.242311	0.234031	0.247391	0.411126	-0.230367	0.0825221	0.244264	-0.20756	0.566849	-0.259263	0.0585247	0.18315	0.667295	1.02751	0.65174	0.676956	1.09259	0.467757	1.36544	0.164472	66	423	239	394	269
1	cassubicifolius	10447	10447_G_02	10447_G_02_SL_01	garden	10447_2_SL_1_garden	SL	4N	2_apomictic_obligate_asexual	0	1.21355	1	1	1	NA	NA	NA	marshy_forest	48.3119	10.8479	500	-0.610641	-0.561207	0.542185	0.242311	0.234031	0.247391	0.411126	-0.230367	0.0825221	0.244264	-0.20756	0.566849	-0.259263	0.0585247	0.18315	0.667295	1.02751	0.65174	0.676956	1.09259	0.467757	1.36544	0.164472	8325	196	101	162	105
1	cassubicifolius	10447	10447_G_02	10447_G_02_SL_02	garden	10447_2_SL_2_garden	SL	4N	2_apomictic_obligate_asexual	0	1.21355	1	1	1	NA	NA	NA	marshy_forest	48.3119	10.8479	500	-0.610641	-0.561207	0.542185	0.242311	0.234031	0.247391	0.411126	-0.230367	0.0825221	0.244264	-0.20756	0.566849	-0.259263	0.0585247	0.18315	0.667295	1.02751	0.65174	0.676956	1.09259	0.467757	1.36544	0.164472	8326	234	139	224	148
1	cassubicifolius	10447	10447_G_02	10447_G_02_SL_03	garden	10447_2_SL_3_garden	SL	4N	2_apomictic_obligate_asexual	0	1.21355	1	1	1	NA	NA	NA	marshy_forest	48.3119	10.8479	500	-0.610641	-0.561207	0.542185	0.242311	0.234031	0.247391	0.411126	-0.230367	0.0825221	0.244264	-0.20756	0.566849	-0.259263	0.0585247	0.18315	0.667295	1.02751	0.65174	0.676956	1.09259	0.467757	1.36544	0.164472	8327	243	162	227	166
1	cassubicifolius	10447	10447_G_03	10447_G_03_BL_01	garden	10447_3_BL_1_garden	BL	4N	2_apomictic_obligate_asexual	0	1.21355	1	1	1	NA	NA	NA	marshy_forest	48.3119	10.8479	500	-0.610641	-0.561207	0.542185	0.242311	0.234031	0.247391	0.411126	-0.230367	0.0825221	0.244264	-0.20756	0.566849	-0.259263	0.0585247	0.18315	0.667295	1.02751	0.65174	0.676956	1.09259	0.467757	1.36544	0.164472	67	305	98	282	109
1	cassubicifolius	10447	10447_G_03	10447_G_03_BL_02	garden	10447_3_BL_2_garden	BL	4N	2_apomictic_obligate_asexual	0	1.21355	1	1	1	NA	NA	NA	marshy_forest	48.3119	10.8479	500	-0.610641	-0.561207	0.542185	0.242311	0.234031	0.247391	0.411126	-0.230367	0.0825221	0.244264	-0.20756	0.566849	-0.259263	0.0585247	0.18315	0.667295	1.02751	0.65174	0.676956	1.09259	0.467757	1.36544	0.164472	68	433	177	411	187
1	cassubicifolius	10447	10447_G_03	10447_G_03_BL_03	garden	10447_3_BL_3_garden	BL	4N	2_apomictic_obligate_asexual	0	1.21355	1	1	1	NA	NA	NA	marshy_forest	48.3119	10.8479	500	-0.610641	-0.561207	0.542185	0.242311	0.234031	0.247391	0.411126	-0.230367	0.0825221	0.244264	-0.20756	0.566849	-0.259263	0.0585247	0.18315	0.667295	1.02751	0.65174	0.676956	1.09259	0.467757	1.36544	0.164472	69	285	138	270	146
1	cassubicifolius	10447	10447_G_03	10447_G_03_RT_01	garden	10447_3_1_garden	RT	4N	2_apomictic_obligate_asexual	0	1.21355	1	1	1	NA	NA	NA	marshy_forest	48.3119	10.8479	500	-0.610641	-0.561207	0.542185	0.242311	0.234031	0.247391	0.411126	-0.230367	0.0825221	0.244264	-0.20756	0.566849	-0.259263	0.0585247	0.18315	0.667295	1.02751	0.65174	0.676956	1.09259	0.467757	1.36544	0.164472	4511	1174	210	1007	115
1	cassubicifolius	10447	10447_G_03	10447_G_03_RT_02	garden	10447_3_2_garden	RT	4N	2_apomictic_obligate_asexual	0	1.21355	1	1	1	NA	NA	NA	marshy_forest	48.3119	10.8479	500	-0.610641	-0.561207	0.542185	0.242311	0.234031	0.247391	0.411126	-0.230367	0.0825221	0.244264	-0.20756	0.566849	-0.259263	0.0585247	0.18315	0.667295	1.02751	0.65174	0.676956	1.09259	0.467757	1.36544	0.164472	4512	1350	213	1174	294
1	cassubicifolius	10447	10447_G_03	10447_G_03_SL_01	garden	10447_3_SL_1_garden	SL	4N	2_apomictic_obligate_asexual	0	1.21355	1	1	1	NA	NA	NA	marshy_forest	48.3119	10.8479	500	-0.610641	-0.561207	0.542185	0.242311	0.234031	0.247391	0.411126	-0.230367	0.0825221	0.244264	-0.20756	0.566849	-0.259263	0.0585247	0.18315	0.667295	1.02751	0.65174	0.676956	1.09259	0.467757	1.36544	0.164472	8328	138	61	118	70
1	cassubicifolius	10447	10447_G_03	10447_G_03_SL_02	garden	10447_3_SL_2_garden	SL	4N	2_apomictic_obligate_asexual	0	1.21355	1	1	1	NA	NA	NA	marshy_forest	48.3119	10.8479	500	-0.610641	-0.561207	0.542185	0.242311	0.234031	0.247391	0.411126	-0.230367	0.0825221	0.244264	-0.20756	0.566849	-0.259263	0.0585247	0.18315	0.667295	1.02751	0.65174	0.676956	1.09259	0.467757	1.36544	0.164472	8329	266	90	260	85
1	cassubicifolius	10447	10447_G_03	10447_G_03_SL_03	garden	10447_3_SL_3_garden	SL	4N	2_apomictic_obligate_asexual	0	1.21355	1	1	1	NA	NA	NA	marshy_forest	48.3119	10.8479	500	-0.610641	-0.561207	0.542185	0.242311	0.234031	0.247391	0.411126	-0.230367	0.0825221	0.244264	-0.20756	0.566849	-0.259263	0.0585247	0.18315	0.667295	1.02751	0.65174	0.676956	1.09259	0.467757	1.36544	0.164472	8330	175	54	165	55
1	cassubicifolius	LH006	LH006_G_01	LH006_G_01_BL_01	garden	LH006_01_09052018_1	BL	2N	1_sexual	5	0.595712	1	1	1	1	1	1	marshy_forest	47.8112	12.5068	539	-0.704383	-0.290003	0.646854	0.206417	0.18471	1.63551	0.914504	0.201818	0.466097	-0.429866	0.877804	0.627458	-0.38787	0.176042	-0.058377	1.6226	2.16887	0.935992	1.25687	2.45923	0.985167	2.79155	0.59621	437	565	370	527	398
1	cassubicifolius	LH006	LH006_G_01	LH006_G_01_BL_02	garden	LH006_01_09052018_2	BL	2N	1_sexual	5	0.595712	1	1	1	1	1	1	marshy_forest	47.8112	12.5068	539	-0.704383	-0.290003	0.646854	0.206417	0.18471	1.63551	0.914504	0.201818	0.466097	-0.429866	0.877804	0.627458	-0.38787	0.176042	-0.058377	1.6226	2.16887	0.935992	1.25687	2.45923	0.985167	2.79155	0.59621	438	548	272	495	309
1	cassubicifolius	LH006	LH006_G_02	LH006_G_02_BL_01	garden	LH006_02_09052018_1	BL	2N	1_sexual	5	0.595712	1	1	1	1	1	1	marshy_forest	47.8112	12.5068	539	-0.704383	-0.290003	0.646854	0.206417	0.18471	1.63551	0.914504	0.201818	0.466097	-0.429866	0.877804	0.627458	-0.38787	0.176042	-0.058377	1.6226	2.16887	0.935992	1.25687	2.45923	0.985167	2.79155	0.59621	439	612	318	549	348
1	cassubicifolius	LH006	LH006_G_03	LH006_G_03_BL_01	garden	LH006_03_11052018_1	BL	2N	1_sexual	5	0.595712	1	1	1	1	1	1	marshy_forest	47.8112	12.5068	539	-0.704383	-0.290003	0.646854	0.206417	0.18471	1.63551	0.914504	0.201818	0.466097	-0.429866	0.877804	0.627458	-0.38787	0.176042	-0.058377	1.6226	2.16887	0.935992	1.25687	2.45923	0.985167	2.79155	0.59621	440	471	327	401	347
1	cassubicifolius	LH006	LH006_G_03	LH006_G_03_BL_01	garden	LH006_03_R_cassubicifolius_BL_1	BL	2N	1_sexual	5	0.595712	1	1	1	1	1	1	marshy_forest	47.8112	12.5068	539	-0.704383	-0.290003	0.646854	0.206417	0.18471	1.63551	0.914504	0.201818	0.466097	-0.429866	0.877804	0.627458	-0.38787	0.176042	-0.058377	1.6226	2.16887	0.935992	1.25687	2.45923	0.985167	2.79155	0.59621	441	839	418	709	433
1	cassubicifolius	LH006	LH006_G_03	LH006_G_03_BL_02	garden	LH006_03_R_cassubicifolius_BL_2	BL	2N	1_sexual	5	0.595712	1	1	1	1	1	1	marshy_forest	47.8112	12.5068	539	-0.704383	-0.290003	0.646854	0.206417	0.18471	1.63551	0.914504	0.201818	0.466097	-0.429866	0.877804	0.627458	-0.38787	0.176042	-0.058377	1.6226	2.16887	0.935992	1.25687	2.45923	0.985167	2.79155	0.59621	442	476	249	417	273
1	cassubicifolius	LH006	LH006_G_03	LH006_G_03_BL_03	garden	LH006_03_R_cassubicifolius_BL_3	BL	2N	1_sexual	5	0.595712	1	1	1	1	1	1	marshy_forest	47.8112	12.5068	539	-0.704383	-0.290003	0.646854	0.206417	0.18471	1.63551	0.914504	0.201818	0.466097	-0.429866	0.877804	0.627458	-0.38787	0.176042	-0.058377	1.6226	2.16887	0.935992	1.25687	2.45923	0.985167	2.79155	0.59621	443	444	336	407	336
1	cassubicifolius	LH006	LH006_G_03	LH006_G_03_RT_01	garden	LH006_03_01	RT	2N	1_sexual	5	0.595712	1	1	1	1	1	1	marshy_forest	47.8112	12.5068	539	-0.704383	-0.290003	0.646854	0.206417	0.18471	1.63551	0.914504	0.201818	0.466097	-0.429866	0.877804	0.627458	-0.38787	0.176042	-0.058377	1.6226	2.16887	0.935992	1.25687	2.45923	0.985167	2.79155	0.59621	4867	1476	322	1235	295
1	cassubicifolius	LH006	LH006_G_03	LH006_G_03_RT_02	garden	LH006_03_02	RT	2N	1_sexual	5	0.595712	1	1	1	1	1	1	marshy_forest	47.8112	12.5068	539	-0.704383	-0.290003	0.646854	0.206417	0.18471	1.63551	0.914504	0.201818	0.466097	-0.429866	0.877804	0.627458	-0.38787	0.176042	-0.058377	1.6226	2.16887	0.935992	1.25687	2.45923	0.985167	2.79155	0.59621	4868	1412	754	1180	772
1	cassubicifolius	LH006	LH006_G_03	LH006_G_03_SL_01	garden	LH006_03_R_cassubicifolius_SL_1	SL	2N	1_sexual	5	0.595712	1	1	1	1	1	1	marshy_forest	47.8112	12.5068	539	-0.704383	-0.290003	0.646854	0.206417	0.18471	1.63551	0.914504	0.201818	0.466097	-0.429866	0.877804	0.627458	-0.38787	0.176042	-0.058377	1.6226	2.16887	0.935992	1.25687	2.45923	0.985167	2.79155	0.59621	8739	177	166	160	180
1	cassubicifolius	LH006	LH006_G_03	LH006_G_03_SL_02	garden	LH006_03_R_cassubicifolius_SL_2	SL	2N	1_sexual	5	0.595712	1	1	1	1	1	1	marshy_forest	47.8112	12.5068	539	-0.704383	-0.290003	0.646854	0.206417	0.18471	1.63551	0.914504	0.201818	0.466097	-0.429866	0.877804	0.627458	-0.38787	0.176042	-0.058377	1.6226	2.16887	0.935992	1.25687	2.45923	0.985167	2.79155	0.59621	8740	94	55	84	54
1	cassubicifolius	LH006	LH006_G_04	LH006_G_04_BL_01	garden	LH006_04_09052018_1	BL	2N	1_sexual	5	0.595712	1	1	1	1	1	1	marshy_forest	47.8112	12.5068	539	-0.704383	-0.290003	0.646854	0.206417	0.18471	1.63551	0.914504	0.201818	0.466097	-0.429866	0.877804	0.627458	-0.38787	0.176042	-0.058377	1.6226	2.16887	0.935992	1.25687	2.45923	0.985167	2.79155	0.59621	444	423	301	380	335
1	cassubicifolius	LH006	LH006_G_04	LH006_G_04_BL_01	garden	LH006_04_R_cassubicifolius_BL_1	BL	2N	1_sexual	5	0.595712	1	1	1	1	1	1	marshy_forest	47.8112	12.5068	539	-0.704383	-0.290003	0.646854	0.206417	0.18471	1.63551	0.914504	0.201818	0.466097	-0.429866	0.877804	0.627458	-0.38787	0.176042	-0.058377	1.6226	2.16887	0.935992	1.25687	2.45923	0.985167	2.79155	0.59621	445	668	348	574	390
1	cassubicifolius	LH006	LH006_G_04	LH006_G_04_BL_02	garden	LH006_04_R_cassubicifolius_BL_2	BL	2N	1_sexual	5	0.595712	1	1	1	1	1	1	marshy_forest	47.8112	12.5068	539	-0.704383	-0.290003	0.646854	0.206417	0.18471	1.63551	0.914504	0.201818	0.466097	-0.429866	0.877804	0.627458	-0.38787	0.176042	-0.058377	1.6226	2.16887	0.935992	1.25687	2.45923	0.985167	2.79155	0.59621	446	622	484	544	509
1	cassubicifolius	LH006	LH006_G_04	LH006_G_04_BL_03	garden	LH006_04_R_cassubicifolius_BL_3	BL	2N	1_sexual	5	0.595712	1	1	1	1	1	1	marshy_forest	47.8112	12.5068	539	-0.704383	-0.290003	0.646854	0.206417	0.18471	1.63551	0.914504	0.201818	0.466097	-0.429866	0.877804	0.627458	-0.38787	0.176042	-0.058377	1.6226	2.16887	0.935992	1.25687	2.45923	0.985167	2.79155	0.59621	447	720	335	599	384
1	cassubicifolius	LH006	LH006_G_04	LH006_G_04_SL_01	garden	LH006_04_R_cassubicifolius_SL_1	SL	2N	1_sexual	5	0.595712	1	1	1	1	1	1	marshy_forest	47.8112	12.5068	539	-0.704383	-0.290003	0.646854	0.206417	0.18471	1.63551	0.914504	0.201818	0.466097	-0.429866	0.877804	0.627458	-0.38787	0.176042	-0.058377	1.6226	2.16887	0.935992	1.25687	2.45923	0.985167	2.79155	0.59621	8741	82	48	72	56
1	cassubicifolius	LH006	LH006_G_04	LH006_G_04_SL_02	garden	LH006_04_R_cassubicifolius_SL_2	SL	2N	1_sexual	5	0.595712	1	1	1	1	1	1	marshy_forest	47.8112	12.5068	539	-0.704383	-0.290003	0.646854	0.206417	0.18471	1.63551	0.914504	0.201818	0.466097	-0.429866	0.877804	0.627458	-0.38787	0.176042	-0.058377	1.6226	2.16887	0.935992	1.25687	2.45923	0.985167	2.79155	0.59621	8742	203	63	193	59
1	cassubicifolius	LH006	LH006_G_04	LH006_G_04_SL_03	garden	LH006_04_R_cassubicifolius_SL_3	SL	2N	1_sexual	5	0.595712	1	1	1	1	1	1	marshy_forest	47.8112	12.5068	539	-0.704383	-0.290003	0.646854	0.206417	0.18471	1.63551	0.914504	0.201818	0.466097	-0.429866	0.877804	0.627458	-0.38787	0.176042	-0.058377	1.6226	2.16887	0.935992	1.25687	2.45923	0.985167	2.79155	0.59621	8743	245	75	232	85
1	cassubicifolius	LH006	LH006_G_05	LH006_G_05_BL_01	garden	LH006_05_09052018_1	BL	2N	1_sexual	5	0.595712	1	1	1	1	1	1	marshy_forest	47.8112	12.5068	539	-0.704383	-0.290003	0.646854	0.206417	0.18471	1.63551	0.914504	0.201818	0.466097	-0.429866	0.877804	0.627458	-0.38787	0.176042	-0.058377	1.6226	2.16887	0.935992	1.25687	2.45923	0.985167	2.79155	0.59621	448	403	226	347	254
1	cassubicifolius	LH006	LH006_G_05	LH006_G_05_BL_02	garden	LH006_05_09052018_2	BL	2N	1_sexual	5	0.595712	1	1	1	1	1	1	marshy_forest	47.8112	12.5068	539	-0.704383	-0.290003	0.646854	0.206417	0.18471	1.63551	0.914504	0.201818	0.466097	-0.429866	0.877804	0.627458	-0.38787	0.176042	-0.058377	1.6226	2.16887	0.935992	1.25687	2.45923	0.985167	2.79155	0.59621	449	597	309	533	337
1	cassubicifolius	LH006	LH006_G_05	LH006_G_05_RT_01	garden	LH006_05_01	RT	2N	1_sexual	5	0.595712	1	1	1	1	1	1	marshy_forest	47.8112	12.5068	539	-0.704383	-0.290003	0.646854	0.206417	0.18471	1.63551	0.914504	0.201818	0.466097	-0.429866	0.877804	0.627458	-0.38787	0.176042	-0.058377	1.6226	2.16887	0.935992	1.25687	2.45923	0.985167	2.79155	0.59621	4869	1612	473	1431	443
1	cassubicifolius	LH006	LH006_G_05	LH006_G_05_RT_02	garden	LH006_05_02	RT	2N	1_sexual	5	0.595712	1	1	1	1	1	1	marshy_forest	47.8112	12.5068	539	-0.704383	-0.290003	0.646854	0.206417	0.18471	1.63551	0.914504	0.201818	0.466097	-0.429866	0.877804	0.627458	-0.38787	0.176042	-0.058377	1.6226	2.16887	0.935992	1.25687	2.45923	0.985167	2.79155	0.59621	4870	1552	524	1346	538
1	cassubicifolius	LH006	LH006_G_06	LH006_G_06_BL_01	garden	LH006_06_09052018_1	BL	2N	1_sexual	5	0.595712	1	1	1	1	1	1	marshy_forest	47.8112	12.5068	539	-0.704383	-0.290003	0.646854	0.206417	0.18471	1.63551	0.914504	0.201818	0.466097	-0.429866	0.877804	0.627458	-0.38787	0.176042	-0.058377	1.6226	2.16887	0.935992	1.25687	2.45923	0.985167	2.79155	0.59621	450	607	280	554	332
1	cassubicifolius	LH006	LH006_G_06	LH006_G_06_BL_02	garden	LH006_06_09052018_2	BL	2N	1_sexual	5	0.595712	1	1	1	1	1	1	marshy_forest	47.8112	12.5068	539	-0.704383	-0.290003	0.646854	0.206417	0.18471	1.63551	0.914504	0.201818	0.466097	-0.429866	0.877804	0.627458	-0.38787	0.176042	-0.058377	1.6226	2.16887	0.935992	1.25687	2.45923	0.985167	2.79155	0.59621	451	514	226	450	280
1	cassubicifolius	LH006	LH006_G_07	LH006_G_07_BL_01	garden	LH006_07_R_cassubicifolius_BL_1	BL	2N	1_sexual	5	0.595712	1	1	1	1	1	1	marshy_forest	47.8112	12.5068	539	-0.704383	-0.290003	0.646854	0.206417	0.18471	1.63551	0.914504	0.201818	0.466097	-0.429866	0.877804	0.627458	-0.38787	0.176042	-0.058377	1.6226	2.16887	0.935992	1.25687	2.45923	0.985167	2.79155	0.59621	452	771	531	677	539
1	cassubicifolius	LH006	LH006_G_07	LH006_G_07_BL_02	garden	LH006_07_R_cassubicifolius_BL_2	BL	2N	1_sexual	5	0.595712	1	1	1	1	1	1	marshy_forest	47.8112	12.5068	539	-0.704383	-0.290003	0.646854	0.206417	0.18471	1.63551	0.914504	0.201818	0.466097	-0.429866	0.877804	0.627458	-0.38787	0.176042	-0.058377	1.6226	2.16887	0.935992	1.25687	2.45923	0.985167	2.79155	0.59621	453	587	416	520	431
1	cassubicifolius	LH006	LH006_G_07	LH006_G_07_BL_03	garden	LH006_07_R_cassubicifolius_BL_3	BL	2N	1_sexual	5	0.595712	1	1	1	1	1	1	marshy_forest	47.8112	12.5068	539	-0.704383	-0.290003	0.646854	0.206417	0.18471	1.63551	0.914504	0.201818	0.466097	-0.429866	0.877804	0.627458	-0.38787	0.176042	-0.058377	1.6226	2.16887	0.935992	1.25687	2.45923	0.985167	2.79155	0.59621	454	747	461	619	532
1	cassubicifolius	LH006	LH006_G_08	LH006_G_08_RT_01	garden	LH006_08_01	RT	2N	1_sexual	5	0.595712	1	1	1	1	1	1	marshy_forest	47.8112	12.5068	539	-0.704383	-0.290003	0.646854	0.206417	0.18471	1.63551	0.914504	0.201818	0.466097	-0.429866	0.877804	0.627458	-0.38787	0.176042	-0.058377	1.6226	2.16887	0.935992	1.25687	2.45923	0.985167	2.79155	0.59621	4871	1447	269	1252	272
1	cassubicifolius	LH006	LH006_G_08	LH006_G_08_RT_02	garden	LH006_08_02	RT	2N	1_sexual	5	0.595712	1	1	1	1	1	1	marshy_forest	47.8112	12.5068	539	-0.704383	-0.290003	0.646854	0.206417	0.18471	1.63551	0.914504	0.201818	0.466097	-0.429866	0.877804	0.627458	-0.38787	0.176042	-0.058377	1.6226	2.16887	0.935992	1.25687	2.45923	0.985167	2.79155	0.59621	4872	1150	218	1036	230
1	cassubicifolius	LH006	LH006_G_08	LH006_G_08_RT_03	garden	LH006_08_03	RT	2N	1_sexual	5	0.595712	1	1	1	1	1	1	marshy_forest	47.8112	12.5068	539	-0.704383	-0.290003	0.646854	0.206417	0.18471	1.63551	0.914504	0.201818	0.466097	-0.429866	0.877804	0.627458	-0.38787	0.176042	-0.058377	1.6226	2.16887	0.935992	1.25687	2.45923	0.985167	2.79155	0.59621	4873	1550	441	1366	409
1	cassubicifolius	LH006	LH006_G_08	LH006_G_08_RT_04	garden	LH006_08_04	RT	2N	1_sexual	5	0.595712	1	1	1	1	1	1	marshy_forest	47.8112	12.5068	539	-0.704383	-0.290003	0.646854	0.206417	0.18471	1.63551	0.914504	0.201818	0.466097	-0.429866	0.877804	0.627458	-0.38787	0.176042	-0.058377	1.6226	2.16887	0.935992	1.25687	2.45923	0.985167	2.79155	0.59621	4874	1477	620	1334	630
1	cassubicifolius	LH006	LH006_G_10	LH006_G_10_BL_01	garden	LH006_10_09052018_1	BL	2N	1_sexual	5	0.595712	1	1	1	1	1	1	marshy_forest	47.8112	12.5068	539	-0.704383	-0.290003	0.646854	0.206417	0.18471	1.63551	0.914504	0.201818	0.466097	-0.429866	0.877804	0.627458	-0.38787	0.176042	-0.058377	1.6226	2.16887	0.935992	1.25687	2.45923	0.985167	2.79155	0.59621	455	611	364	556	399
1	cassubicifolius	LH006	LH006_G_10	LH006_G_10_BL_01	garden	LH006_10_R_cassubicifolius_BL_1	BL	2N	1_sexual	5	0.595712	1	1	1	1	1	1	marshy_forest	47.8112	12.5068	539	-0.704383	-0.290003	0.646854	0.206417	0.18471	1.63551	0.914504	0.201818	0.466097	-0.429866	0.877804	0.627458	-0.38787	0.176042	-0.058377	1.6226	2.16887	0.935992	1.25687	2.45923	0.985167	2.79155	0.59621	456	784	570	676	594
1	cassubicifolius	LH006	LH006_G_10	LH006_G_10_BL_02	garden	LH006_10_R_cassubicifolius_BL_2	BL	2N	1_sexual	5	0.595712	1	1	1	1	1	1	marshy_forest	47.8112	12.5068	539	-0.704383	-0.290003	0.646854	0.206417	0.18471	1.63551	0.914504	0.201818	0.466097	-0.429866	0.877804	0.627458	-0.38787	0.176042	-0.058377	1.6226	2.16887	0.935992	1.25687	2.45923	0.985167	2.79155	0.59621	457	786	462	713	510
1	cassubicifolius	LH006	LH006_G_10	LH006_G_10_BL_03	garden	LH006_10_R_cassubicifolius_BL_3	BL	2N	1_sexual	5	0.595712	1	1	1	1	1	1	marshy_forest	47.8112	12.5068	539	-0.704383	-0.290003	0.646854	0.206417	0.18471	1.63551	0.914504	0.201818	0.466097	-0.429866	0.877804	0.627458	-0.38787	0.176042	-0.058377	1.6226	2.16887	0.935992	1.25687	2.45923	0.985167	2.79155	0.59621	458	744	666	665	681
1	cassubicifolius	LH006	LH006_G_10	LH006_G_10_RT_01	garden	LH006_10_01	RT	2N	1_sexual	5	0.595712	1	1	1	1	1	1	marshy_forest	47.8112	12.5068	539	-0.704383	-0.290003	0.646854	0.206417	0.18471	1.63551	0.914504	0.201818	0.466097	-0.429866	0.877804	0.627458	-0.38787	0.176042	-0.058377	1.6226	2.16887	0.935992	1.25687	2.45923	0.985167	2.79155	0.59621	4875	1616	606	1483	524
1	cassubicifolius	LH006	LH006_G_10	LH006_G_10_RT_02	garden	LH006_10_02	RT	2N	1_sexual	5	0.595712	1	1	1	1	1	1	marshy_forest	47.8112	12.5068	539	-0.704383	-0.290003	0.646854	0.206417	0.18471	1.63551	0.914504	0.201818	0.466097	-0.429866	0.877804	0.627458	-0.38787	0.176042	-0.058377	1.6226	2.16887	0.935992	1.25687	2.45923	0.985167	2.79155	0.59621	4876	1688	437	1518	395
1	cassubicifolius	LH006	LH006_G_10	LH006_G_10_RT_03	garden	LH006_10_03	RT	2N	1_sexual	5	0.595712	1	1	1	1	1	1	marshy_forest	47.8112	12.5068	539	-0.704383	-0.290003	0.646854	0.206417	0.18471	1.63551	0.914504	0.201818	0.466097	-0.429866	0.877804	0.627458	-0.38787	0.176042	-0.058377	1.6226	2.16887	0.935992	1.25687	2.45923	0.985167	2.79155	0.59621	4877	1639	607	1506	556
1	cassubicifolius	LH006	LH006_G_10	LH006_G_10_SL_01	garden	LH006_10_R_cassubicifolius_SL_1	SL	2N	1_sexual	5	0.595712	1	1	1	1	1	1	marshy_forest	47.8112	12.5068	539	-0.704383	-0.290003	0.646854	0.206417	0.18471	1.63551	0.914504	0.201818	0.466097	-0.429866	0.877804	0.627458	-0.38787	0.176042	-0.058377	1.6226	2.16887	0.935992	1.25687	2.45923	0.985167	2.79155	0.59621	8744	233	98	222	112
1	cassubicifolius	LH006	LH006_G_10	LH006_G_10_SL_02	garden	LH006_10_R_cassubicifolius_SL_2	SL	2N	1_sexual	5	0.595712	1	1	1	1	1	1	marshy_forest	47.8112	12.5068	539	-0.704383	-0.290003	0.646854	0.206417	0.18471	1.63551	0.914504	0.201818	0.466097	-0.429866	0.877804	0.627458	-0.38787	0.176042	-0.058377	1.6226	2.16887	0.935992	1.25687	2.45923	0.985167	2.79155	0.59621	8745	311	89	290	75
1	cassubicifolius	LH006	LH006_G_10	LH006_G_10_SL_03	garden	LH006_10_R_cassubicifolius_SL_3	SL	2N	1_sexual	5	0.595712	1	1	1	1	1	1	marshy_forest	47.8112	12.5068	539	-0.704383	-0.290003	0.646854	0.206417	0.18471	1.63551	0.914504	0.201818	0.466097	-0.429866	0.877804	0.627458	-0.38787	0.176042	-0.058377	1.6226	2.16887	0.935992	1.25687	2.45923	0.985167	2.79155	0.59621	8746	187	73	157	63
1	cassubicifolius	LH006	LH006_G_11	LH006_G_11_BL_01	garden	LH006_11_R_cassubicifolius_BL_1	BL	2N	1_sexual	5	0.595712	1	1	1	1	1	1	marshy_forest	47.8112	12.5068	539	-0.704383	-0.290003	0.646854	0.206417	0.18471	1.63551	0.914504	0.201818	0.466097	-0.429866	0.877804	0.627458	-0.38787	0.176042	-0.058377	1.6226	2.16887	0.935992	1.25687	2.45923	0.985167	2.79155	0.59621	459	554	312	474	331
1	cassubicifolius	LH006	LH006_G_11	LH006_G_11_BL_02	garden	LH006_11_R_cassubicifolius_BL_2	BL	2N	1_sexual	5	0.595712	1	1	1	1	1	1	marshy_forest	47.8112	12.5068	539	-0.704383	-0.290003	0.646854	0.206417	0.18471	1.63551	0.914504	0.201818	0.466097	-0.429866	0.877804	0.627458	-0.38787	0.176042	-0.058377	1.6226	2.16887	0.935992	1.25687	2.45923	0.985167	2.79155	0.59621	460	552	330	482	353
1	cassubicifolius	LH006	LH006_G_11	LH006_G_11_BL_03	garden	LH006_11_R_cassubicifolius_BL_3	BL	2N	1_sexual	5	0.595712	1	1	1	1	1	1	marshy_forest	47.8112	12.5068	539	-0.704383	-0.290003	0.646854	0.206417	0.18471	1.63551	0.914504	0.201818	0.466097	-0.429866	0.877804	0.627458	-0.38787	0.176042	-0.058377	1.6226	2.16887	0.935992	1.25687	2.45923	0.985167	2.79155	0.59621	461	514	252	446	265
1	cassubicifolius	LH006	LH006_G_11	LH006_G_11_SL_01	garden	LH006_11_R_cassubicifolius_SL_1	SL	2N	1_sexual	5	0.595712	1	1	1	1	1	1	marshy_forest	47.8112	12.5068	539	-0.704383	-0.290003	0.646854	0.206417	0.18471	1.63551	0.914504	0.201818	0.466097	-0.429866	0.877804	0.627458	-0.38787	0.176042	-0.058377	1.6226	2.16887	0.935992	1.25687	2.45923	0.985167	2.79155	0.59621	8747	83	57	70	60
1	cassubicifolius	LH006	LH006_G_11	LH006_G_11_SL_02	garden	LH006_11_R_cassubicifolius_SL_2	SL	2N	1_sexual	5	0.595712	1	1	1	1	1	1	marshy_forest	47.8112	12.5068	539	-0.704383	-0.290003	0.646854	0.206417	0.18471	1.63551	0.914504	0.201818	0.466097	-0.429866	0.877804	0.627458	-0.38787	0.176042	-0.058377	1.6226	2.16887	0.935992	1.25687	2.45923	0.985167	2.79155	0.59621	8748	159	85	155	82
1	cassubicifolius	LH006	LH006_G_11	LH006_G_11_SL_03	garden	LH006_11_R_cassubicifolius_SL_3	SL	2N	1_sexual	5	0.595712	1	1	1	1	1	1	marshy_forest	47.8112	12.5068	539	-0.704383	-0.290003	0.646854	0.206417	0.18471	1.63551	0.914504	0.201818	0.466097	-0.429866	0.877804	0.627458	-0.38787	0.176042	-0.058377	1.6226	2.16887	0.935992	1.25687	2.45923	0.985167	2.79155	0.59621	8749	205	78	192	67
1	cassubicifolius	LH006	LH006_G_12	LH006_G_12_BL_01	garden	LH006_12_09052018_1	BL	2N	1_sexual	5	0.595712	1	1	1	1	1	1	marshy_forest	47.8112	12.5068	539	-0.704383	-0.290003	0.646854	0.206417	0.18471	1.63551	0.914504	0.201818	0.466097	-0.429866	0.877804	0.627458	-0.38787	0.176042	-0.058377	1.6226	2.16887	0.935992	1.25687	2.45923	0.985167	2.79155	0.59621	462	487	217	450	224
1	cassubicifolius	LH006	LH006_G_12	LH006_G_12_BL_01	garden	LH006_12_11052018_1	BL	2N	1_sexual	5	0.595712	1	1	1	1	1	1	marshy_forest	47.8112	12.5068	539	-0.704383	-0.290003	0.646854	0.206417	0.18471	1.63551	0.914504	0.201818	0.466097	-0.429866	0.877804	0.627458	-0.38787	0.176042	-0.058377	1.6226	2.16887	0.935992	1.25687	2.45923	0.985167	2.79155	0.59621	463	413	276	373	309
1	cassubicifolius	LH006	LH006_G_12	LH006_G_12_BL_02	garden	LH006_12_09052018_2	BL	2N	1_sexual	5	0.595712	1	1	1	1	1	1	marshy_forest	47.8112	12.5068	539	-0.704383	-0.290003	0.646854	0.206417	0.18471	1.63551	0.914504	0.201818	0.466097	-0.429866	0.877804	0.627458	-0.38787	0.176042	-0.058377	1.6226	2.16887	0.935992	1.25687	2.45923	0.985167	2.79155	0.59621	464	472	286	422	297
1	cassubicifolius	LH006	LH006_G_12	LH006_G_12_BL_02	garden	LH006_12_11052018_2	BL	2N	1_sexual	5	0.595712	1	1	1	1	1	1	marshy_forest	47.8112	12.5068	539	-0.704383	-0.290003	0.646854	0.206417	0.18471	1.63551	0.914504	0.201818	0.466097	-0.429866	0.877804	0.627458	-0.38787	0.176042	-0.058377	1.6226	2.16887	0.935992	1.25687	2.45923	0.985167	2.79155	0.59621	465	409	247	394	275
1	cassubicifolius	LH006	LH006_G_12	LH006_G_12_RT_01	garden	LH006_12_01	RT	2N	1_sexual	5	0.595712	1	1	1	1	1	1	marshy_forest	47.8112	12.5068	539	-0.704383	-0.290003	0.646854	0.206417	0.18471	1.63551	0.914504	0.201818	0.466097	-0.429866	0.877804	0.627458	-0.38787	0.176042	-0.058377	1.6226	2.16887	0.935992	1.25687	2.45923	0.985167	2.79155	0.59621	4878	1509	432	1375	448
1	cassubicifolius	LH006	LH006_G_12	LH006_G_12_RT_02	garden	LH006_12_02	RT	2N	1_sexual	5	0.595712	1	1	1	1	1	1	marshy_forest	47.8112	12.5068	539	-0.704383	-0.290003	0.646854	0.206417	0.18471	1.63551	0.914504	0.201818	0.466097	-0.429866	0.877804	0.627458	-0.38787	0.176042	-0.058377	1.6226	2.16887	0.935992	1.25687	2.45923	0.985167	2.79155	0.59621	4879	1835	350	1722	322
1	cassubicifolius	LH006	LH006_G_12	LH006_G_12_RT_03	garden	LH006_12_03	RT	2N	1_sexual	5	0.595712	1	1	1	1	1	1	marshy_forest	47.8112	12.5068	539	-0.704383	-0.290003	0.646854	0.206417	0.18471	1.63551	0.914504	0.201818	0.466097	-0.429866	0.877804	0.627458	-0.38787	0.176042	-0.058377	1.6226	2.16887	0.935992	1.25687	2.45923	0.985167	2.79155	0.59621	4880	1552	494	1412	496
1	cassubicifolius	LH006	LH006_G_12	LH006_G_12_SL_01	garden	LH006_12_09052018_1	SL	2N	1_sexual	5	0.595712	1	1	1	1	1	1	marshy_forest	47.8112	12.5068	539	-0.704383	-0.290003	0.646854	0.206417	0.18471	1.63551	0.914504	0.201818	0.466097	-0.429866	0.877804	0.627458	-0.38787	0.176042	-0.058377	1.6226	2.16887	0.935992	1.25687	2.45923	0.985167	2.79155	0.59621	8750	174	98	157	99
1	cassubicifolius	LH006	LH006_G_12	LH006_G_12_SL_02	garden	LH006_12_09052018_2	SL	2N	1_sexual	5	0.595712	1	1	1	1	1	1	marshy_forest	47.8112	12.5068	539	-0.704383	-0.290003	0.646854	0.206417	0.18471	1.63551	0.914504	0.201818	0.466097	-0.429866	0.877804	0.627458	-0.38787	0.176042	-0.058377	1.6226	2.16887	0.935992	1.25687	2.45923	0.985167	2.79155	0.59621	8751	162	87	157	92
1	cassubicifolius	LH006	LH006_G_13	LH006_G_13_BL_01	garden	LH006_13_09052018_1	BL	2N	1_sexual	5	0.595712	1	1	1	1	1	1	marshy_forest	47.8112	12.5068	539	-0.704383	-0.290003	0.646854	0.206417	0.18471	1.63551	0.914504	0.201818	0.466097	-0.429866	0.877804	0.627458	-0.38787	0.176042	-0.058377	1.6226	2.16887	0.935992	1.25687	2.45923	0.985167	2.79155	0.59621	466	545	228	495	257
1	cassubicifolius	LH006	LH006_G_13	LH006_G_13_RT_01	garden	LH006_13_01	RT	2N	1_sexual	5	0.595712	1	1	1	1	1	1	marshy_forest	47.8112	12.5068	539	-0.704383	-0.290003	0.646854	0.206417	0.18471	1.63551	0.914504	0.201818	0.466097	-0.429866	0.877804	0.627458	-0.38787	0.176042	-0.058377	1.6226	2.16887	0.935992	1.25687	2.45923	0.985167	2.79155	0.59621	4881	1674	340	1522	311
1	cassubicifolius	LH006	LH006_G_13	LH006_G_13_RT_02	garden	LH006_13_02	RT	2N	1_sexual	5	0.595712	1	1	1	1	1	1	marshy_forest	47.8112	12.5068	539	-0.704383	-0.290003	0.646854	0.206417	0.18471	1.63551	0.914504	0.201818	0.466097	-0.429866	0.877804	0.627458	-0.38787	0.176042	-0.058377	1.6226	2.16887	0.935992	1.25687	2.45923	0.985167	2.79155	0.59621	4882	1573	664	1460	653
1	cassubicifolius	LH006	LH006_G_13	LH006_G_13_RT_03	garden	LH006_13_03	RT	2N	1_sexual	5	0.595712	1	1	1	1	1	1	marshy_forest	47.8112	12.5068	539	-0.704383	-0.290003	0.646854	0.206417	0.18471	1.63551	0.914504	0.201818	0.466097	-0.429866	0.877804	0.627458	-0.38787	0.176042	-0.058377	1.6226	2.16887	0.935992	1.25687	2.45923	0.985167	2.79155	0.59621	4883	1534	278	1396	251
1	cassubicifolius	LH006	LH006_G_13	LH006_G_13_SL_01	garden	LH006_13_09052018_1	SL	2N	1_sexual	5	0.595712	1	1	1	1	1	1	marshy_forest	47.8112	12.5068	539	-0.704383	-0.290003	0.646854	0.206417	0.18471	1.63551	0.914504	0.201818	0.466097	-0.429866	0.877804	0.627458	-0.38787	0.176042	-0.058377	1.6226	2.16887	0.935992	1.25687	2.45923	0.985167	2.79155	0.59621	8752	147	58	134	64
1	cassubicifolius	LH006	LH006_G_13	LH006_G_13_SL_02	garden	LH006_13_09052018_2	SL	2N	1_sexual	5	0.595712	1	1	1	1	1	1	marshy_forest	47.8112	12.5068	539	-0.704383	-0.290003	0.646854	0.206417	0.18471	1.63551	0.914504	0.201818	0.466097	-0.429866	0.877804	0.627458	-0.38787	0.176042	-0.058377	1.6226	2.16887	0.935992	1.25687	2.45923	0.985167	2.79155	0.59621	8753	104	80	93	93
1	cassubicifolius	LH006	LH006_G_14	LH006_G_14_BL_01	garden	LH006_14_09052018_1	BL	2N	1_sexual	5	0.595712	1	1	1	1	1	1	marshy_forest	47.8112	12.5068	539	-0.704383	-0.290003	0.646854	0.206417	0.18471	1.63551	0.914504	0.201818	0.466097	-0.429866	0.877804	0.627458	-0.38787	0.176042	-0.058377	1.6226	2.16887	0.935992	1.25687	2.45923	0.985167	2.79155	0.59621	467	458	259	428	276
1	cassubicifolius	LH006	LH006_G_14	LH006_G_14_BL_01	garden	LH006_14_R_cassubicifolius_BL_1	BL	2N	1_sexual	5	0.595712	1	1	1	1	1	1	marshy_forest	47.8112	12.5068	539	-0.704383	-0.290003	0.646854	0.206417	0.18471	1.63551	0.914504	0.201818	0.466097	-0.429866	0.877804	0.627458	-0.38787	0.176042	-0.058377	1.6226	2.16887	0.935992	1.25687	2.45923	0.985167	2.79155	0.59621	468	588	421	538	424
1	cassubicifolius	LH006	LH006_G_14	LH006_G_14_BL_02	garden	LH006_14_09052018_2	BL	2N	1_sexual	5	0.595712	1	1	1	1	1	1	marshy_forest	47.8112	12.5068	539	-0.704383	-0.290003	0.646854	0.206417	0.18471	1.63551	0.914504	0.201818	0.466097	-0.429866	0.877804	0.627458	-0.38787	0.176042	-0.058377	1.6226	2.16887	0.935992	1.25687	2.45923	0.985167	2.79155	0.59621	469	528	290	500	315
1	cassubicifolius	LH006	LH006_G_14	LH006_G_14_BL_02	garden	LH006_14_R_cassubicifolius_BL_2	BL	2N	1_sexual	5	0.595712	1	1	1	1	1	1	marshy_forest	47.8112	12.5068	539	-0.704383	-0.290003	0.646854	0.206417	0.18471	1.63551	0.914504	0.201818	0.466097	-0.429866	0.877804	0.627458	-0.38787	0.176042	-0.058377	1.6226	2.16887	0.935992	1.25687	2.45923	0.985167	2.79155	0.59621	470	564	322	499	345
1	cassubicifolius	LH006	LH006_G_14	LH006_G_14_BL_03	garden	LH006_14_R_cassubicifolius_BL_3	BL	2N	1_sexual	5	0.595712	1	1	1	1	1	1	marshy_forest	47.8112	12.5068	539	-0.704383	-0.290003	0.646854	0.206417	0.18471	1.63551	0.914504	0.201818	0.466097	-0.429866	0.877804	0.627458	-0.38787	0.176042	-0.058377	1.6226	2.16887	0.935992	1.25687	2.45923	0.985167	2.79155	0.59621	471	656	510	612	547
1	cassubicifolius	LH006	LH006_G_14	LH006_G_14_RT_01	garden	LH006_14_01	RT	2N	1_sexual	5	0.595712	1	1	1	1	1	1	marshy_forest	47.8112	12.5068	539	-0.704383	-0.290003	0.646854	0.206417	0.18471	1.63551	0.914504	0.201818	0.466097	-0.429866	0.877804	0.627458	-0.38787	0.176042	-0.058377	1.6226	2.16887	0.935992	1.25687	2.45923	0.985167	2.79155	0.59621	4884	1430	421	1302	501
1	cassubicifolius	LH006	LH006_G_14	LH006_G_14_RT_02	garden	LH006_14_02	RT	2N	1_sexual	5	0.595712	1	1	1	1	1	1	marshy_forest	47.8112	12.5068	539	-0.704383	-0.290003	0.646854	0.206417	0.18471	1.63551	0.914504	0.201818	0.466097	-0.429866	0.877804	0.627458	-0.38787	0.176042	-0.058377	1.6226	2.16887	0.935992	1.25687	2.45923	0.985167	2.79155	0.59621	4885	1520	508	1380	510
1	cassubicifolius	LH006	LH006_G_14	LH006_G_14_RT_03	garden	LH006_14_03	RT	2N	1_sexual	5	0.595712	1	1	1	1	1	1	marshy_forest	47.8112	12.5068	539	-0.704383	-0.290003	0.646854	0.206417	0.18471	1.63551	0.914504	0.201818	0.466097	-0.429866	0.877804	0.627458	-0.38787	0.176042	-0.058377	1.6226	2.16887	0.935992	1.25687	2.45923	0.985167	2.79155	0.59621	4886	1488	400	1322	370
1	cassubicifolius	LH006	LH006_G_14	LH006_G_14_RT_04	garden	LH006_14_04	RT	2N	1_sexual	5	0.595712	1	1	1	1	1	1	marshy_forest	47.8112	12.5068	539	-0.704383	-0.290003	0.646854	0.206417	0.18471	1.63551	0.914504	0.201818	0.466097	-0.429866	0.877804	0.627458	-0.38787	0.176042	-0.058377	1.6226	2.16887	0.935992	1.25687	2.45923	0.985167	2.79155	0.59621	4887	1633	533	1497	531
1	cassubicifolius	LH006	LH006_G_14	LH006_G_14_RT_05	garden	LH006_14_05	RT	2N	1_sexual	5	0.595712	1	1	1	1	1	1	marshy_forest	47.8112	12.5068	539	-0.704383	-0.290003	0.646854	0.206417	0.18471	1.63551	0.914504	0.201818	0.466097	-0.429866	0.877804	0.627458	-0.38787	0.176042	-0.058377	1.6226	2.16887	0.935992	1.25687	2.45923	0.985167	2.79155	0.59621	4888	1713	543	1630	508
1	cassubicifolius	LH006	LH006_G_14	LH006_G_14_RT_06	garden	LH006_14_06	RT	2N	1_sexual	5	0.595712	1	1	1	1	1	1	marshy_forest	47.8112	12.5068	539	-0.704383	-0.290003	0.646854	0.206417	0.18471	1.63551	0.914504	0.201818	0.466097	-0.429866	0.877804	0.627458	-0.38787	0.176042	-0.058377	1.6226	2.16887	0.935992	1.25687	2.45923	0.985167	2.79155	0.59621	4889	1761	319	1633	311
1	cassubicifolius	LH006	LH006_G_14	LH006_G_14_SL_01	garden	LH006_14_09052018_1	SL	2N	1_sexual	5	0.595712	1	1	1	1	1	1	marshy_forest	47.8112	12.5068	539	-0.704383	-0.290003	0.646854	0.206417	0.18471	1.63551	0.914504	0.201818	0.466097	-0.429866	0.877804	0.627458	-0.38787	0.176042	-0.058377	1.6226	2.16887	0.935992	1.25687	2.45923	0.985167	2.79155	0.59621	8754	77	88	71	96
1	cassubicifolius	LH006	LH006_G_14	LH006_G_14_SL_01	garden	LH006_14_11052018_1	SL	2N	1_sexual	5	0.595712	1	1	1	1	1	1	marshy_forest	47.8112	12.5068	539	-0.704383	-0.290003	0.646854	0.206417	0.18471	1.63551	0.914504	0.201818	0.466097	-0.429866	0.877804	0.627458	-0.38787	0.176042	-0.058377	1.6226	2.16887	0.935992	1.25687	2.45923	0.985167	2.79155	0.59621	8755	186	163	177	162
1	cassubicifolius	LH006	LH006_G_14	LH006_G_14_SL_01	garden	LH006_14_R_cassubicifolius_SL_1	SL	2N	1_sexual	5	0.595712	1	1	1	1	1	1	marshy_forest	47.8112	12.5068	539	-0.704383	-0.290003	0.646854	0.206417	0.18471	1.63551	0.914504	0.201818	0.466097	-0.429866	0.877804	0.627458	-0.38787	0.176042	-0.058377	1.6226	2.16887	0.935992	1.25687	2.45923	0.985167	2.79155	0.59621	8756	103	58	86	62
1	cassubicifolius	LH006	LH006_G_14	LH006_G_14_SL_02	garden	LH006_14_R_cassubicifolius_SL_2	SL	2N	1_sexual	5	0.595712	1	1	1	1	1	1	marshy_forest	47.8112	12.5068	539	-0.704383	-0.290003	0.646854	0.206417	0.18471	1.63551	0.914504	0.201818	0.466097	-0.429866	0.877804	0.627458	-0.38787	0.176042	-0.058377	1.6226	2.16887	0.935992	1.25687	2.45923	0.985167	2.79155	0.59621	8757	308	91	286	76
1	cassubicifolius	LH006	LH006_G_14	LH006_G_14_SL_03	garden	LH006_14_R_cassubicifolius_SL_3	SL	2N	1_sexual	5	0.595712	1	1	1	1	1	1	marshy_forest	47.8112	12.5068	539	-0.704383	-0.290003	0.646854	0.206417	0.18471	1.63551	0.914504	0.201818	0.466097	-0.429866	0.877804	0.627458	-0.38787	0.176042	-0.058377	1.6226	2.16887	0.935992	1.25687	2.45923	0.985167	2.79155	0.59621	8758	150	42	124	52
1	cassubicifolius	LH006	LH006_G_15	LH006_G_15_BL_01	garden	LH006_15_09052018_1	BL	2N	1_sexual	5	0.595712	1	1	1	1	1	1	marshy_forest	47.8112	12.5068	539	-0.704383	-0.290003	0.646854	0.206417	0.18471	1.63551	0.914504	0.201818	0.466097	-0.429866	0.877804	0.627458	-0.38787	0.176042	-0.058377	1.6226	2.16887	0.935992	1.25687	2.45923	0.985167	2.79155	0.59621	472	513	261	469	315
1	cassubicifolius	LH006	LH006_G_15	LH006_G_15_BL_01	garden	LH006_15_R_cassubicifolius_BL_1	BL	2N	1_sexual	5	0.595712	1	1	1	1	1	1	marshy_forest	47.8112	12.5068	539	-0.704383	-0.290003	0.646854	0.206417	0.18471	1.63551	0.914504	0.201818	0.466097	-0.429866	0.877804	0.627458	-0.38787	0.176042	-0.058377	1.6226	2.16887	0.935992	1.25687	2.45923	0.985167	2.79155	0.59621	473	744	487	634	545
1	cassubicifolius	LH006	LH006_G_15	LH006_G_15_BL_02	garden	LH006_15_R_cassubicifolius_BL_2	BL	2N	1_sexual	5	0.595712	1	1	1	1	1	1	marshy_forest	47.8112	12.5068	539	-0.704383	-0.290003	0.646854	0.206417	0.18471	1.63551	0.914504	0.201818	0.466097	-0.429866	0.877804	0.627458	-0.38787	0.176042	-0.058377	1.6226	2.16887	0.935992	1.25687	2.45923	0.985167	2.79155	0.59621	474	646	365	556	411
1	cassubicifolius	LH006	LH006_G_15	LH006_G_15_BL_03	garden	LH006_15_R_cassubicifolius_BL_3	BL	2N	1_sexual	5	0.595712	1	1	1	1	1	1	marshy_forest	47.8112	12.5068	539	-0.704383	-0.290003	0.646854	0.206417	0.18471	1.63551	0.914504	0.201818	0.466097	-0.429866	0.877804	0.627458	-0.38787	0.176042	-0.058377	1.6226	2.16887	0.935992	1.25687	2.45923	0.985167	2.79155	0.59621	475	669	381	596	397
1	cassubicifolius	LH006	LH006_G_15	LH006_G_15_SL_01	garden	LH006_15_R_cassubicifolius_SL_1	SL	2N	1_sexual	5	0.595712	1	1	1	1	1	1	marshy_forest	47.8112	12.5068	539	-0.704383	-0.290003	0.646854	0.206417	0.18471	1.63551	0.914504	0.201818	0.466097	-0.429866	0.877804	0.627458	-0.38787	0.176042	-0.058377	1.6226	2.16887	0.935992	1.25687	2.45923	0.985167	2.79155	0.59621	8759	154	82	143	74
1	cassubicifolius	LH006	LH006_G_15	LH006_G_15_SL_02	garden	LH006_15_R_cassubicifolius_SL_2	SL	2N	1_sexual	5	0.595712	1	1	1	1	1	1	marshy_forest	47.8112	12.5068	539	-0.704383	-0.290003	0.646854	0.206417	0.18471	1.63551	0.914504	0.201818	0.466097	-0.429866	0.877804	0.627458	-0.38787	0.176042	-0.058377	1.6226	2.16887	0.935992	1.25687	2.45923	0.985167	2.79155	0.59621	8760	114	81	93	75
1	cassubicifolius	LH006	LH006_G_16	LH006_G_16_BL_01	garden	LH006_16_09052018_1	BL	2N	1_sexual	5	0.595712	1	1	1	1	1	1	marshy_forest	47.8112	12.5068	539	-0.704383	-0.290003	0.646854	0.206417	0.18471	1.63551	0.914504	0.201818	0.466097	-0.429866	0.877804	0.627458	-0.38787	0.176042	-0.058377	1.6226	2.16887	0.935992	1.25687	2.45923	0.985167	2.79155	0.59621	476	562	339	504	386
1	cassubicifolius	LH006	LH006_G_16	LH006_G_16_RT_01	garden	LH006_16_01	RT	2N	1_sexual	5	0.595712	1	1	1	1	1	1	marshy_forest	47.8112	12.5068	539	-0.704383	-0.290003	0.646854	0.206417	0.18471	1.63551	0.914504	0.201818	0.466097	-0.429866	0.877804	0.627458	-0.38787	0.176042	-0.058377	1.6226	2.16887	0.935992	1.25687	2.45923	0.985167	2.79155	0.59621	4890	1446	552	1313	558
1	cassubicifolius	LH006	LH006_G_17	LH006_G_17_BL_01	garden	LH006_17_09052018_1	BL	2N	1_sexual	5	0.595712	1	1	1	1	1	1	marshy_forest	47.8112	12.5068	539	-0.704383	-0.290003	0.646854	0.206417	0.18471	1.63551	0.914504	0.201818	0.466097	-0.429866	0.877804	0.627458	-0.38787	0.176042	-0.058377	1.6226	2.16887	0.935992	1.25687	2.45923	0.985167	2.79155	0.59621	477	551	262	485	279
1	cassubicifolius	LH006	LH006_G_17	LH006_G_17_BL_01	garden	LH006_17_11052018_1	BL	2N	1_sexual	5	0.595712	1	1	1	1	1	1	marshy_forest	47.8112	12.5068	539	-0.704383	-0.290003	0.646854	0.206417	0.18471	1.63551	0.914504	0.201818	0.466097	-0.429866	0.877804	0.627458	-0.38787	0.176042	-0.058377	1.6226	2.16887	0.935992	1.25687	2.45923	0.985167	2.79155	0.59621	478	491	258	458	290
1	cassubicifolius	LH006	LH006_G_17	LH006_G_17_BL_01	garden	LH006_17_R_cassubicifolius_BL_1	BL	2N	1_sexual	5	0.595712	1	1	1	1	1	1	marshy_forest	47.8112	12.5068	539	-0.704383	-0.290003	0.646854	0.206417	0.18471	1.63551	0.914504	0.201818	0.466097	-0.429866	0.877804	0.627458	-0.38787	0.176042	-0.058377	1.6226	2.16887	0.935992	1.25687	2.45923	0.985167	2.79155	0.59621	479	547	306	479	329
1	cassubicifolius	LH006	LH006_G_17	LH006_G_17_BL_02	garden	LH006_17_09052018_2	BL	2N	1_sexual	5	0.595712	1	1	1	1	1	1	marshy_forest	47.8112	12.5068	539	-0.704383	-0.290003	0.646854	0.206417	0.18471	1.63551	0.914504	0.201818	0.466097	-0.429866	0.877804	0.627458	-0.38787	0.176042	-0.058377	1.6226	2.16887	0.935992	1.25687	2.45923	0.985167	2.79155	0.59621	480	466	217	445	235
1	cassubicifolius	LH006	LH006_G_17	LH006_G_17_BL_02	garden	LH006_17_R_cassubicifolius_BL_2	BL	2N	1_sexual	5	0.595712	1	1	1	1	1	1	marshy_forest	47.8112	12.5068	539	-0.704383	-0.290003	0.646854	0.206417	0.18471	1.63551	0.914504	0.201818	0.466097	-0.429866	0.877804	0.627458	-0.38787	0.176042	-0.058377	1.6226	2.16887	0.935992	1.25687	2.45923	0.985167	2.79155	0.59621	481	423	241	370	255
1	cassubicifolius	LH006	LH006_G_17	LH006_G_17_BL_03	garden	LH006_17_R_cassubicifolius_BL_3	BL	2N	1_sexual	5	0.595712	1	1	1	1	1	1	marshy_forest	47.8112	12.5068	539	-0.704383	-0.290003	0.646854	0.206417	0.18471	1.63551	0.914504	0.201818	0.466097	-0.429866	0.877804	0.627458	-0.38787	0.176042	-0.058377	1.6226	2.16887	0.935992	1.25687	2.45923	0.985167	2.79155	0.59621	482	542	412	498	424
1	cassubicifolius	LH006	LH006_G_17	LH006_G_17_RT_01	garden	LH006_17_01	RT	2N	1_sexual	5	0.595712	1	1	1	1	1	1	marshy_forest	47.8112	12.5068	539	-0.704383	-0.290003	0.646854	0.206417	0.18471	1.63551	0.914504	0.201818	0.466097	-0.429866	0.877804	0.627458	-0.38787	0.176042	-0.058377	1.6226	2.16887	0.935992	1.25687	2.45923	0.985167	2.79155	0.59621	4891	1511	730	1419	676
1	cassubicifolius	LH006	LH006_G_17	LH006_G_17_RT_02	garden	LH006_17_02	RT	2N	1_sexual	5	0.595712	1	1	1	1	1	1	marshy_forest	47.8112	12.5068	539	-0.704383	-0.290003	0.646854	0.206417	0.18471	1.63551	0.914504	0.201818	0.466097	-0.429866	0.877804	0.627458	-0.38787	0.176042	-0.058377	1.6226	2.16887	0.935992	1.25687	2.45923	0.985167	2.79155	0.59621	4892	1539	784	1394	763
1	cassubicifolius	LH006	LH006_G_18	LH006_G_18_BL_01	garden	LH006_18_09052018_1	BL	2N	1_sexual	5	0.595712	1	1	1	1	1	1	marshy_forest	47.8112	12.5068	539	-0.704383	-0.290003	0.646854	0.206417	0.18471	1.63551	0.914504	0.201818	0.466097	-0.429866	0.877804	0.627458	-0.38787	0.176042	-0.058377	1.6226	2.16887	0.935992	1.25687	2.45923	0.985167	2.79155	0.59621	483	772	526	684	599
1	cassubicifolius	LH006	LH006_G_18	LH006_G_18_BL_01	garden	LH006_18_R_cassubicifolius_BL_1	BL	2N	1_sexual	5	0.595712	1	1	1	1	1	1	marshy_forest	47.8112	12.5068	539	-0.704383	-0.290003	0.646854	0.206417	0.18471	1.63551	0.914504	0.201818	0.466097	-0.429866	0.877804	0.627458	-0.38787	0.176042	-0.058377	1.6226	2.16887	0.935992	1.25687	2.45923	0.985167	2.79155	0.59621	484	626	351	488	373
1	cassubicifolius	LH006	LH006_G_18	LH006_G_18_BL_02	garden	LH006_18_R_cassubicifolius_BL_2	BL	2N	1_sexual	5	0.595712	1	1	1	1	1	1	marshy_forest	47.8112	12.5068	539	-0.704383	-0.290003	0.646854	0.206417	0.18471	1.63551	0.914504	0.201818	0.466097	-0.429866	0.877804	0.627458	-0.38787	0.176042	-0.058377	1.6226	2.16887	0.935992	1.25687	2.45923	0.985167	2.79155	0.59621	485	616	423	536	462
1	cassubicifolius	LH006	LH006_G_18	LH006_G_18_BL_03	garden	LH006_18_R_cassubicifolius_BL_3	BL	2N	1_sexual	5	0.595712	1	1	1	1	1	1	marshy_forest	47.8112	12.5068	539	-0.704383	-0.290003	0.646854	0.206417	0.18471	1.63551	0.914504	0.201818	0.466097	-0.429866	0.877804	0.627458	-0.38787	0.176042	-0.058377	1.6226	2.16887	0.935992	1.25687	2.45923	0.985167	2.79155	0.59621	486	722	518	649	520
1	cassubicifolius	LH006	LH006_G_18	LH006_G_18_RT_01	garden	LH006_18_01	RT	2N	1_sexual	5	0.595712	1	1	1	1	1	1	marshy_forest	47.8112	12.5068	539	-0.704383	-0.290003	0.646854	0.206417	0.18471	1.63551	0.914504	0.201818	0.466097	-0.429866	0.877804	0.627458	-0.38787	0.176042	-0.058377	1.6226	2.16887	0.935992	1.25687	2.45923	0.985167	2.79155	0.59621	4893	1656	352	1481	326
1	cassubicifolius	LH006	LH006_G_18	LH006_G_18_RT_02	garden	LH006_18_02	RT	2N	1_sexual	5	0.595712	1	1	1	1	1	1	marshy_forest	47.8112	12.5068	539	-0.704383	-0.290003	0.646854	0.206417	0.18471	1.63551	0.914504	0.201818	0.466097	-0.429866	0.877804	0.627458	-0.38787	0.176042	-0.058377	1.6226	2.16887	0.935992	1.25687	2.45923	0.985167	2.79155	0.59621	4894	1421	659	1245	632
1	cassubicifolius	LH006	LH006_G_18	LH006_G_18_RT_03	garden	LH006_18_03	RT	2N	1_sexual	5	0.595712	1	1	1	1	1	1	marshy_forest	47.8112	12.5068	539	-0.704383	-0.290003	0.646854	0.206417	0.18471	1.63551	0.914504	0.201818	0.466097	-0.429866	0.877804	0.627458	-0.38787	0.176042	-0.058377	1.6226	2.16887	0.935992	1.25687	2.45923	0.985167	2.79155	0.59621	4895	1580	536	1492	494
1	cassubicifolius	LH006	LH006_G_18	LH006_G_18_SL_01	garden	LH006_18_R_cassubicifolius_SL_1	SL	2N	1_sexual	5	0.595712	1	1	1	1	1	1	marshy_forest	47.8112	12.5068	539	-0.704383	-0.290003	0.646854	0.206417	0.18471	1.63551	0.914504	0.201818	0.466097	-0.429866	0.877804	0.627458	-0.38787	0.176042	-0.058377	1.6226	2.16887	0.935992	1.25687	2.45923	0.985167	2.79155	0.59621	8761	118	57	107	67
1	cassubicifolius	LH006	LH006_G_18	LH006_G_18_SL_02	garden	LH006_18_R_cassubicifolius_SL_2	SL	2N	1_sexual	5	0.595712	1	1	1	1	1	1	marshy_forest	47.8112	12.5068	539	-0.704383	-0.290003	0.646854	0.206417	0.18471	1.63551	0.914504	0.201818	0.466097	-0.429866	0.877804	0.627458	-0.38787	0.176042	-0.058377	1.6226	2.16887	0.935992	1.25687	2.45923	0.985167	2.79155	0.59621	8762	137	55	119	52
1	cassubicifolius	LH007	LH007_G_01	LH007_G_01_BL_01	garden	LH007_01_11052018_1	BL	2N	1_sexual	10	0.647666	1	1	1	NA	NA	NA	humid_forest	47.9931	13.1032	511	-0.670322	-0.192509	0.571707	0.0359711	0.18471	1.72805	1.16619	0.126717	0.466097	-0.394385	0.837606	0.597154	-0.38787	0.117283	-0.058377	2.3938	2.8875	1.93087	0.531976	3.06663	2.13247	3.42538	1.72695	487	652	548	623	559
1	cassubicifolius	LH007	LH007_G_01	LH007_G_01_RT_01	garden	LH007_01_01	RT	2N	1_sexual	10	0.647666	1	1	1	NA	NA	NA	humid_forest	47.9931	13.1032	511	-0.670322	-0.192509	0.571707	0.0359711	0.18471	1.72805	1.16619	0.126717	0.466097	-0.394385	0.837606	0.597154	-0.38787	0.117283	-0.058377	2.3938	2.8875	1.93087	0.531976	3.06663	2.13247	3.42538	1.72695	4896	1582	538	1385	483
1	cassubicifolius	LH007	LH007_G_01	LH007_G_01_RT_02	garden	LH007_01_02	RT	2N	1_sexual	10	0.647666	1	1	1	NA	NA	NA	humid_forest	47.9931	13.1032	511	-0.670322	-0.192509	0.571707	0.0359711	0.18471	1.72805	1.16619	0.126717	0.466097	-0.394385	0.837606	0.597154	-0.38787	0.117283	-0.058377	2.3938	2.8875	1.93087	0.531976	3.06663	2.13247	3.42538	1.72695	4897	1524	496	1329	466
1	cassubicifolius	LH007	LH007_G_01	LH007_G_01_RT_03	garden	LH007_01_03	RT	2N	1_sexual	10	0.647666	1	1	1	NA	NA	NA	humid_forest	47.9931	13.1032	511	-0.670322	-0.192509	0.571707	0.0359711	0.18471	1.72805	1.16619	0.126717	0.466097	-0.394385	0.837606	0.597154	-0.38787	0.117283	-0.058377	2.3938	2.8875	1.93087	0.531976	3.06663	2.13247	3.42538	1.72695	4898	1573	756	1361	735
1	cassubicifolius	LH007	LH007_G_02	LH007_G_02_BL_01	garden	LH007_02_11052018_1	BL	2N	1_sexual	10	0.647666	1	1	1	NA	NA	NA	humid_forest	47.9931	13.1032	511	-0.670322	-0.192509	0.571707	0.0359711	0.18471	1.72805	1.16619	0.126717	0.466097	-0.394385	0.837606	0.597154	-0.38787	0.117283	-0.058377	2.3938	2.8875	1.93087	0.531976	3.06663	2.13247	3.42538	1.72695	488	522	241	496	262
1	cassubicifolius	LH007	LH007_G_02	LH007_G_02_BL_02	garden	LH007_02_11052018_2	BL	2N	1_sexual	10	0.647666	1	1	1	NA	NA	NA	humid_forest	47.9931	13.1032	511	-0.670322	-0.192509	0.571707	0.0359711	0.18471	1.72805	1.16619	0.126717	0.466097	-0.394385	0.837606	0.597154	-0.38787	0.117283	-0.058377	2.3938	2.8875	1.93087	0.531976	3.06663	2.13247	3.42538	1.72695	489	509	354	494	377
1	cassubicifolius	LH007	LH007_G_02	LH007_G_02_RT_01	garden	LH007_02_01	RT	2N	1_sexual	10	0.647666	1	1	1	NA	NA	NA	humid_forest	47.9931	13.1032	511	-0.670322	-0.192509	0.571707	0.0359711	0.18471	1.72805	1.16619	0.126717	0.466097	-0.394385	0.837606	0.597154	-0.38787	0.117283	-0.058377	2.3938	2.8875	1.93087	0.531976	3.06663	2.13247	3.42538	1.72695	4899	1747	278	1612	200
1	cassubicifolius	LH007	LH007_G_02	LH007_G_02_RT_02	garden	LH007_02_02	RT	2N	1_sexual	10	0.647666	1	1	1	NA	NA	NA	humid_forest	47.9931	13.1032	511	-0.670322	-0.192509	0.571707	0.0359711	0.18471	1.72805	1.16619	0.126717	0.466097	-0.394385	0.837606	0.597154	-0.38787	0.117283	-0.058377	2.3938	2.8875	1.93087	0.531976	3.06663	2.13247	3.42538	1.72695	4900	1687	446	1538	414
1	cassubicifolius	LH007	LH007_G_02	LH007_G_02_RT_03	garden	LH007_02_03	RT	2N	1_sexual	10	0.647666	1	1	1	NA	NA	NA	humid_forest	47.9931	13.1032	511	-0.670322	-0.192509	0.571707	0.0359711	0.18471	1.72805	1.16619	0.126717	0.466097	-0.394385	0.837606	0.597154	-0.38787	0.117283	-0.058377	2.3938	2.8875	1.93087	0.531976	3.06663	2.13247	3.42538	1.72695	4901	1577	728	1451	675
1	cassubicifolius	LH007	LH007_G_02	LH007_G_02_SL_01	garden	LH007_02_11052018_1	SL	2N	1_sexual	10	0.647666	1	1	1	NA	NA	NA	humid_forest	47.9931	13.1032	511	-0.670322	-0.192509	0.571707	0.0359711	0.18471	1.72805	1.16619	0.126717	0.466097	-0.394385	0.837606	0.597154	-0.38787	0.117283	-0.058377	2.3938	2.8875	1.93087	0.531976	3.06663	2.13247	3.42538	1.72695	8763	197	87	181	103
1	cassubicifolius	LH007	LH007_G_02	LH007_G_02_SL_02	garden	LH007_02_11052018_2	SL	2N	1_sexual	10	0.647666	1	1	1	NA	NA	NA	humid_forest	47.9931	13.1032	511	-0.670322	-0.192509	0.571707	0.0359711	0.18471	1.72805	1.16619	0.126717	0.466097	-0.394385	0.837606	0.597154	-0.38787	0.117283	-0.058377	2.3938	2.8875	1.93087	0.531976	3.06663	2.13247	3.42538	1.72695	8764	165	90	149	92
1	cassubicifolius	LH007	LH007_G_02	LH007_G_02_SL_03	garden	LH007_02_11052018_3	SL	2N	1_sexual	10	0.647666	1	1	1	NA	NA	NA	humid_forest	47.9931	13.1032	511	-0.670322	-0.192509	0.571707	0.0359711	0.18471	1.72805	1.16619	0.126717	0.466097	-0.394385	0.837606	0.597154	-0.38787	0.117283	-0.058377	2.3938	2.8875	1.93087	0.531976	3.06663	2.13247	3.42538	1.72695	8765	167	77	156	79
1	cassubicifolius	LH007	LH007_G_03	LH007_G_03_BL_01	garden	LH007_03_11052018_1	BL	2N	1_sexual	10	0.647666	1	1	1	NA	NA	NA	humid_forest	47.9931	13.1032	511	-0.670322	-0.192509	0.571707	0.0359711	0.18471	1.72805	1.16619	0.126717	0.466097	-0.394385	0.837606	0.597154	-0.38787	0.117283	-0.058377	2.3938	2.8875	1.93087	0.531976	3.06663	2.13247	3.42538	1.72695	490	405	268	374	295
1	cassubicifolius	LH007	LH007_G_03	LH007_G_03_RT_01	garden	LH007_03_01	RT	2N	1_sexual	10	0.647666	1	1	1	NA	NA	NA	humid_forest	47.9931	13.1032	511	-0.670322	-0.192509	0.571707	0.0359711	0.18471	1.72805	1.16619	0.126717	0.466097	-0.394385	0.837606	0.597154	-0.38787	0.117283	-0.058377	2.3938	2.8875	1.93087	0.531976	3.06663	2.13247	3.42538	1.72695	4902	1678	409	1527	345
1	cassubicifolius	LH007	LH007_G_03	LH007_G_03_RT_02	garden	LH007_03_02	RT	2N	1_sexual	10	0.647666	1	1	1	NA	NA	NA	humid_forest	47.9931	13.1032	511	-0.670322	-0.192509	0.571707	0.0359711	0.18471	1.72805	1.16619	0.126717	0.466097	-0.394385	0.837606	0.597154	-0.38787	0.117283	-0.058377	2.3938	2.8875	1.93087	0.531976	3.06663	2.13247	3.42538	1.72695	4903	1559	828	1458	809
1	cassubicifolius	LH007	LH007_G_03	LH007_G_03_RT_03	garden	LH007_03_03	RT	2N	1_sexual	10	0.647666	1	1	1	NA	NA	NA	humid_forest	47.9931	13.1032	511	-0.670322	-0.192509	0.571707	0.0359711	0.18471	1.72805	1.16619	0.126717	0.466097	-0.394385	0.837606	0.597154	-0.38787	0.117283	-0.058377	2.3938	2.8875	1.93087	0.531976	3.06663	2.13247	3.42538	1.72695	4904	1419	867	1284	879
1	cassubicifolius	LH007	LH007_G_03	LH007_G_03_RT_04	garden	LH007_03_04	RT	2N	1_sexual	10	0.647666	1	1	1	NA	NA	NA	humid_forest	47.9931	13.1032	511	-0.670322	-0.192509	0.571707	0.0359711	0.18471	1.72805	1.16619	0.126717	0.466097	-0.394385	0.837606	0.597154	-0.38787	0.117283	-0.058377	2.3938	2.8875	1.93087	0.531976	3.06663	2.13247	3.42538	1.72695	4905	1526	702	1367	613
1	cassubicifolius	LH007	LH007_G_03	LH007_G_03_RT_05	garden	LH007_03_05	RT	2N	1_sexual	10	0.647666	1	1	1	NA	NA	NA	humid_forest	47.9931	13.1032	511	-0.670322	-0.192509	0.571707	0.0359711	0.18471	1.72805	1.16619	0.126717	0.466097	-0.394385	0.837606	0.597154	-0.38787	0.117283	-0.058377	2.3938	2.8875	1.93087	0.531976	3.06663	2.13247	3.42538	1.72695	4906	1504	648	1340	632
1	cassubicifolius	LH007	LH007_G_03	LH007_G_03_SL_01	garden	LH007_03_11052018_1	SL	2N	1_sexual	10	0.647666	1	1	1	NA	NA	NA	humid_forest	47.9931	13.1032	511	-0.670322	-0.192509	0.571707	0.0359711	0.18471	1.72805	1.16619	0.126717	0.466097	-0.394385	0.837606	0.597154	-0.38787	0.117283	-0.058377	2.3938	2.8875	1.93087	0.531976	3.06663	2.13247	3.42538	1.72695	8766	214	106	199	106
1	cassubicifolius	LH007	LH007_G_04	LH007_G_04_BL_01	garden	LH007_04_11052018_1	BL	2N	1_sexual	10	0.647666	1	1	1	NA	NA	NA	humid_forest	47.9931	13.1032	511	-0.670322	-0.192509	0.571707	0.0359711	0.18471	1.72805	1.16619	0.126717	0.466097	-0.394385	0.837606	0.597154	-0.38787	0.117283	-0.058377	2.3938	2.8875	1.93087	0.531976	3.06663	2.13247	3.42538	1.72695	491	517	371	505	382
1	cassubicifolius	LH007	LH007_G_04	LH007_G_04_RT_01	garden	LH007_04_01	RT	2N	1_sexual	10	0.647666	1	1	1	NA	NA	NA	humid_forest	47.9931	13.1032	511	-0.670322	-0.192509	0.571707	0.0359711	0.18471	1.72805	1.16619	0.126717	0.466097	-0.394385	0.837606	0.597154	-0.38787	0.117283	-0.058377	2.3938	2.8875	1.93087	0.531976	3.06663	2.13247	3.42538	1.72695	4907	1640	441	1485	427
1	cassubicifolius	LH007	LH007_G_04	LH007_G_04_RT_02	garden	LH007_04_02	RT	2N	1_sexual	10	0.647666	1	1	1	NA	NA	NA	humid_forest	47.9931	13.1032	511	-0.670322	-0.192509	0.571707	0.0359711	0.18471	1.72805	1.16619	0.126717	0.466097	-0.394385	0.837606	0.597154	-0.38787	0.117283	-0.058377	2.3938	2.8875	1.93087	0.531976	3.06663	2.13247	3.42538	1.72695	4908	1580	493	1389	449
1	cassubicifolius	LH007	LH007_G_04	LH007_G_04_RT_03	garden	LH007_04_03	RT	2N	1_sexual	10	0.647666	1	1	1	NA	NA	NA	humid_forest	47.9931	13.1032	511	-0.670322	-0.192509	0.571707	0.0359711	0.18471	1.72805	1.16619	0.126717	0.466097	-0.394385	0.837606	0.597154	-0.38787	0.117283	-0.058377	2.3938	2.8875	1.93087	0.531976	3.06663	2.13247	3.42538	1.72695	4909	1527	462	1367	457
1	cassubicifolius	LH007	LH007_G_05	LH007_G_05_BL_01	garden	LH007_05_11052018_1	BL	2N	1_sexual	10	0.647666	1	1	1	NA	NA	NA	humid_forest	47.9931	13.1032	511	-0.670322	-0.192509	0.571707	0.0359711	0.18471	1.72805	1.16619	0.126717	0.466097	-0.394385	0.837606	0.597154	-0.38787	0.117283	-0.058377	2.3938	2.8875	1.93087	0.531976	3.06663	2.13247	3.42538	1.72695	492	527	220	501	243
1	cassubicifolius	LH007	LH007_G_05	LH007_G_05_RT_01	garden	LH007_05_01	RT	2N	1_sexual	10	0.647666	1	1	1	NA	NA	NA	humid_forest	47.9931	13.1032	511	-0.670322	-0.192509	0.571707	0.0359711	0.18471	1.72805	1.16619	0.126717	0.466097	-0.394385	0.837606	0.597154	-0.38787	0.117283	-0.058377	2.3938	2.8875	1.93087	0.531976	3.06663	2.13247	3.42538	1.72695	4910	1656	348	1495	371
1	cassubicifolius	LH007	LH007_G_05	LH007_G_05_RT_02	garden	LH007_05_02	RT	2N	1_sexual	10	0.647666	1	1	1	NA	NA	NA	humid_forest	47.9931	13.1032	511	-0.670322	-0.192509	0.571707	0.0359711	0.18471	1.72805	1.16619	0.126717	0.466097	-0.394385	0.837606	0.597154	-0.38787	0.117283	-0.058377	2.3938	2.8875	1.93087	0.531976	3.06663	2.13247	3.42538	1.72695	4911	1718	400	1588	295
1	cassubicifolius	LH007	LH007_G_05	LH007_G_05_RT_03	garden	LH007_05_03	RT	2N	1_sexual	10	0.647666	1	1	1	NA	NA	NA	humid_forest	47.9931	13.1032	511	-0.670322	-0.192509	0.571707	0.0359711	0.18471	1.72805	1.16619	0.126717	0.466097	-0.394385	0.837606	0.597154	-0.38787	0.117283	-0.058377	2.3938	2.8875	1.93087	0.531976	3.06663	2.13247	3.42538	1.72695	4912	1665	316	1495	281
1	cassubicifolius	LH007	LH007_G_05	LH007_G_05_RT_04	garden	LH007_05_04	RT	2N	1_sexual	10	0.647666	1	1	1	NA	NA	NA	humid_forest	47.9931	13.1032	511	-0.670322	-0.192509	0.571707	0.0359711	0.18471	1.72805	1.16619	0.126717	0.466097	-0.394385	0.837606	0.597154	-0.38787	0.117283	-0.058377	2.3938	2.8875	1.93087	0.531976	3.06663	2.13247	3.42538	1.72695	4913	1677	432	1501	437
1	cassubicifolius	LH007	LH007_G_06	LH007_G_06_BL_01	garden	LH007_06_R_cassubicifolius_BL_1	BL	2N	1_sexual	10	0.647666	1	1	1	NA	NA	NA	humid_forest	47.9931	13.1032	511	-0.670322	-0.192509	0.571707	0.0359711	0.18471	1.72805	1.16619	0.126717	0.466097	-0.394385	0.837606	0.597154	-0.38787	0.117283	-0.058377	2.3938	2.8875	1.93087	0.531976	3.06663	2.13247	3.42538	1.72695	493	810	528	682	577
1	cassubicifolius	LH007	LH007_G_06	LH007_G_06_BL_02	garden	LH007_06_R_cassubicifolius_BL_2	BL	2N	1_sexual	10	0.647666	1	1	1	NA	NA	NA	humid_forest	47.9931	13.1032	511	-0.670322	-0.192509	0.571707	0.0359711	0.18471	1.72805	1.16619	0.126717	0.466097	-0.394385	0.837606	0.597154	-0.38787	0.117283	-0.058377	2.3938	2.8875	1.93087	0.531976	3.06663	2.13247	3.42538	1.72695	494	811	560	717	567
1	cassubicifolius	LH007	LH007_G_06	LH007_G_06_RT_01	garden	LH007_06_01	RT	2N	1_sexual	10	0.647666	1	1	1	NA	NA	NA	humid_forest	47.9931	13.1032	511	-0.670322	-0.192509	0.571707	0.0359711	0.18471	1.72805	1.16619	0.126717	0.466097	-0.394385	0.837606	0.597154	-0.38787	0.117283	-0.058377	2.3938	2.8875	1.93087	0.531976	3.06663	2.13247	3.42538	1.72695	4914	1656	595	1536	625
1	cassubicifolius	LH007	LH007_G_06	LH007_G_06_RT_02	garden	LH007_06_02	RT	2N	1_sexual	10	0.647666	1	1	1	NA	NA	NA	humid_forest	47.9931	13.1032	511	-0.670322	-0.192509	0.571707	0.0359711	0.18471	1.72805	1.16619	0.126717	0.466097	-0.394385	0.837606	0.597154	-0.38787	0.117283	-0.058377	2.3938	2.8875	1.93087	0.531976	3.06663	2.13247	3.42538	1.72695	4915	1464	252	1269	237
1	cassubicifolius	LH007	LH007_G_06	LH007_G_06_RT_03	garden	LH007_06_03	RT	2N	1_sexual	10	0.647666	1	1	1	NA	NA	NA	humid_forest	47.9931	13.1032	511	-0.670322	-0.192509	0.571707	0.0359711	0.18471	1.72805	1.16619	0.126717	0.466097	-0.394385	0.837606	0.597154	-0.38787	0.117283	-0.058377	2.3938	2.8875	1.93087	0.531976	3.06663	2.13247	3.42538	1.72695	4916	1492	517	1337	532
1	cassubicifolius	LH007	LH007_G_06	LH007_G_06_RT_04	garden	LH007_06_04	RT	2N	1_sexual	10	0.647666	1	1	1	NA	NA	NA	humid_forest	47.9931	13.1032	511	-0.670322	-0.192509	0.571707	0.0359711	0.18471	1.72805	1.16619	0.126717	0.466097	-0.394385	0.837606	0.597154	-0.38787	0.117283	-0.058377	2.3938	2.8875	1.93087	0.531976	3.06663	2.13247	3.42538	1.72695	4917	1369	529	1162	598
1	cassubicifolius	LH007	LH007_G_06	LH007_G_06_RT_05	garden	LH007_06_05	RT	2N	1_sexual	10	0.647666	1	1	1	NA	NA	NA	humid_forest	47.9931	13.1032	511	-0.670322	-0.192509	0.571707	0.0359711	0.18471	1.72805	1.16619	0.126717	0.466097	-0.394385	0.837606	0.597154	-0.38787	0.117283	-0.058377	2.3938	2.8875	1.93087	0.531976	3.06663	2.13247	3.42538	1.72695	4918	1379	948	1237	986
1	cassubicifolius	LH007	LH007_G_06	LH007_G_06_RT_06	garden	LH007_06_06	RT	2N	1_sexual	10	0.647666	1	1	1	NA	NA	NA	humid_forest	47.9931	13.1032	511	-0.670322	-0.192509	0.571707	0.0359711	0.18471	1.72805	1.16619	0.126717	0.466097	-0.394385	0.837606	0.597154	-0.38787	0.117283	-0.058377	2.3938	2.8875	1.93087	0.531976	3.06663	2.13247	3.42538	1.72695	4919	1366	630	1222	662
1	cassubicifolius	LH007	LH007_G_06	LH007_G_06_RT_07	garden	LH007_06_07	RT	2N	1_sexual	10	0.647666	1	1	1	NA	NA	NA	humid_forest	47.9931	13.1032	511	-0.670322	-0.192509	0.571707	0.0359711	0.18471	1.72805	1.16619	0.126717	0.466097	-0.394385	0.837606	0.597154	-0.38787	0.117283	-0.058377	2.3938	2.8875	1.93087	0.531976	3.06663	2.13247	3.42538	1.72695	4920	1395	906	1276	900
1	cassubicifolius	LH007	LH007_G_06	LH007_G_06_SL_01	garden	LH007_06_R_cassubicifolius_SL_1	SL	2N	1_sexual	10	0.647666	1	1	1	NA	NA	NA	humid_forest	47.9931	13.1032	511	-0.670322	-0.192509	0.571707	0.0359711	0.18471	1.72805	1.16619	0.126717	0.466097	-0.394385	0.837606	0.597154	-0.38787	0.117283	-0.058377	2.3938	2.8875	1.93087	0.531976	3.06663	2.13247	3.42538	1.72695	8767	232	71	223	67
1	cassubicifolius	LH007	LH007_G_06	LH007_G_06_SL_02	garden	LH007_06_R_cassubicifolius_SL_2	SL	2N	1_sexual	10	0.647666	1	1	1	NA	NA	NA	humid_forest	47.9931	13.1032	511	-0.670322	-0.192509	0.571707	0.0359711	0.18471	1.72805	1.16619	0.126717	0.466097	-0.394385	0.837606	0.597154	-0.38787	0.117283	-0.058377	2.3938	2.8875	1.93087	0.531976	3.06663	2.13247	3.42538	1.72695	8768	259	54	243	62
1	cassubicifolius	LH007	LH007_G_06	LH007_G_06_SL_03	garden	LH007_06_R_cassubicifolius_SL_3	SL	2N	1_sexual	10	0.647666	1	1	1	NA	NA	NA	humid_forest	47.9931	13.1032	511	-0.670322	-0.192509	0.571707	0.0359711	0.18471	1.72805	1.16619	0.126717	0.466097	-0.394385	0.837606	0.597154	-0.38787	0.117283	-0.058377	2.3938	2.8875	1.93087	0.531976	3.06663	2.13247	3.42538	1.72695	8769	123	93	115	95
1	cassubicifolius	LH007	LH007_G_07	LH007_G_07_BL_01	garden	LH007_07_11052018_1	BL	2N	1_sexual	10	0.647666	1	1	1	NA	NA	NA	humid_forest	47.9931	13.1032	511	-0.670322	-0.192509	0.571707	0.0359711	0.18471	1.72805	1.16619	0.126717	0.466097	-0.394385	0.837606	0.597154	-0.38787	0.117283	-0.058377	2.3938	2.8875	1.93087	0.531976	3.06663	2.13247	3.42538	1.72695	495	601	258	502	275
1	cassubicifolius	LH007	LH007_G_07	LH007_G_07_BL_01	garden	LH007_07_R_cassubicifolius_BL_1	BL	2N	1_sexual	10	0.647666	1	1	1	NA	NA	NA	humid_forest	47.9931	13.1032	511	-0.670322	-0.192509	0.571707	0.0359711	0.18471	1.72805	1.16619	0.126717	0.466097	-0.394385	0.837606	0.597154	-0.38787	0.117283	-0.058377	2.3938	2.8875	1.93087	0.531976	3.06663	2.13247	3.42538	1.72695	496	835	648	754	652
1	cassubicifolius	LH007	LH007_G_07	LH007_G_07_BL_02	garden	LH007_07_R_cassubicifolius_BL_2	BL	2N	1_sexual	10	0.647666	1	1	1	NA	NA	NA	humid_forest	47.9931	13.1032	511	-0.670322	-0.192509	0.571707	0.0359711	0.18471	1.72805	1.16619	0.126717	0.466097	-0.394385	0.837606	0.597154	-0.38787	0.117283	-0.058377	2.3938	2.8875	1.93087	0.531976	3.06663	2.13247	3.42538	1.72695	497	696	463	636	461
1	cassubicifolius	LH007	LH007_G_07	LH007_G_07_BL_03	garden	LH007_07_R_cassubicifolius_BL_3	BL	2N	1_sexual	10	0.647666	1	1	1	NA	NA	NA	humid_forest	47.9931	13.1032	511	-0.670322	-0.192509	0.571707	0.0359711	0.18471	1.72805	1.16619	0.126717	0.466097	-0.394385	0.837606	0.597154	-0.38787	0.117283	-0.058377	2.3938	2.8875	1.93087	0.531976	3.06663	2.13247	3.42538	1.72695	498	813	475	733	491
1	cassubicifolius	LH007	LH007_G_07	LH007_G_07_RT_01	garden	LH007_07_01	RT	2N	1_sexual	10	0.647666	1	1	1	NA	NA	NA	humid_forest	47.9931	13.1032	511	-0.670322	-0.192509	0.571707	0.0359711	0.18471	1.72805	1.16619	0.126717	0.466097	-0.394385	0.837606	0.597154	-0.38787	0.117283	-0.058377	2.3938	2.8875	1.93087	0.531976	3.06663	2.13247	3.42538	1.72695	4921	1678	287	1461	239
1	cassubicifolius	LH007	LH007_G_07	LH007_G_07_RT_02	garden	LH007_07_02	RT	2N	1_sexual	10	0.647666	1	1	1	NA	NA	NA	humid_forest	47.9931	13.1032	511	-0.670322	-0.192509	0.571707	0.0359711	0.18471	1.72805	1.16619	0.126717	0.466097	-0.394385	0.837606	0.597154	-0.38787	0.117283	-0.058377	2.3938	2.8875	1.93087	0.531976	3.06663	2.13247	3.42538	1.72695	4922	1644	313	1461	269
1	cassubicifolius	LH007	LH007_G_07	LH007_G_07_RT_03	garden	LH007_07_03	RT	2N	1_sexual	10	0.647666	1	1	1	NA	NA	NA	humid_forest	47.9931	13.1032	511	-0.670322	-0.192509	0.571707	0.0359711	0.18471	1.72805	1.16619	0.126717	0.466097	-0.394385	0.837606	0.597154	-0.38787	0.117283	-0.058377	2.3938	2.8875	1.93087	0.531976	3.06663	2.13247	3.42538	1.72695	4923	1658	265	1502	209
1	cassubicifolius	LH007	LH007_G_07	LH007_G_07_SL_01	garden	LH007_07_11052018_1_1	SL	2N	1_sexual	10	0.647666	1	1	1	NA	NA	NA	humid_forest	47.9931	13.1032	511	-0.670322	-0.192509	0.571707	0.0359711	0.18471	1.72805	1.16619	0.126717	0.466097	-0.394385	0.837606	0.597154	-0.38787	0.117283	-0.058377	2.3938	2.8875	1.93087	0.531976	3.06663	2.13247	3.42538	1.72695	8770	91	56	88	63
1	cassubicifolius	LH007	LH007_G_07	LH007_G_07_SL_01	garden	LH007_07_R_cassubicifolius_SL_1	SL	2N	1_sexual	10	0.647666	1	1	1	NA	NA	NA	humid_forest	47.9931	13.1032	511	-0.670322	-0.192509	0.571707	0.0359711	0.18471	1.72805	1.16619	0.126717	0.466097	-0.394385	0.837606	0.597154	-0.38787	0.117283	-0.058377	2.3938	2.8875	1.93087	0.531976	3.06663	2.13247	3.42538	1.72695	8771	66	63	57	65
1	cassubicifolius	LH007	LH007_G_07	LH007_G_07_SL_02	garden	LH007_07_11052018_1_2	SL	2N	1_sexual	10	0.647666	1	1	1	NA	NA	NA	humid_forest	47.9931	13.1032	511	-0.670322	-0.192509	0.571707	0.0359711	0.18471	1.72805	1.16619	0.126717	0.466097	-0.394385	0.837606	0.597154	-0.38787	0.117283	-0.058377	2.3938	2.8875	1.93087	0.531976	3.06663	2.13247	3.42538	1.72695	8772	141	48	132	54
1	cassubicifolius	LH007	LH007_G_07	LH007_G_07_SL_02	garden	LH007_07_R_cassubicifolius_SL_2	SL	2N	1_sexual	10	0.647666	1	1	1	NA	NA	NA	humid_forest	47.9931	13.1032	511	-0.670322	-0.192509	0.571707	0.0359711	0.18471	1.72805	1.16619	0.126717	0.466097	-0.394385	0.837606	0.597154	-0.38787	0.117283	-0.058377	2.3938	2.8875	1.93087	0.531976	3.06663	2.13247	3.42538	1.72695	8773	199	53	191	43
1	cassubicifolius	LH007	LH007_G_08	LH007_G_08_BL_01	garden	LH007_08_11052018_1	BL	2N	1_sexual	10	0.647666	1	1	1	NA	NA	NA	humid_forest	47.9931	13.1032	511	-0.670322	-0.192509	0.571707	0.0359711	0.18471	1.72805	1.16619	0.126717	0.466097	-0.394385	0.837606	0.597154	-0.38787	0.117283	-0.058377	2.3938	2.8875	1.93087	0.531976	3.06663	2.13247	3.42538	1.72695	499	580	475	506	484
1	cassubicifolius	LH007	LH007_G_08	LH007_G_08_BL_02	garden	LH007_08_11052018_2	BL	2N	1_sexual	10	0.647666	1	1	1	NA	NA	NA	humid_forest	47.9931	13.1032	511	-0.670322	-0.192509	0.571707	0.0359711	0.18471	1.72805	1.16619	0.126717	0.466097	-0.394385	0.837606	0.597154	-0.38787	0.117283	-0.058377	2.3938	2.8875	1.93087	0.531976	3.06663	2.13247	3.42538	1.72695	500	603	289	568	321
1	cassubicifolius	LH007	LH007_G_08	LH007_G_08_RT_01	garden	LH007_08_01	RT	2N	1_sexual	10	0.647666	1	1	1	NA	NA	NA	humid_forest	47.9931	13.1032	511	-0.670322	-0.192509	0.571707	0.0359711	0.18471	1.72805	1.16619	0.126717	0.466097	-0.394385	0.837606	0.597154	-0.38787	0.117283	-0.058377	2.3938	2.8875	1.93087	0.531976	3.06663	2.13247	3.42538	1.72695	4924	1380	600	1215	625
1	cassubicifolius	LH007	LH007_G_08	LH007_G_08_RT_02	garden	LH007_08_02	RT	2N	1_sexual	10	0.647666	1	1	1	NA	NA	NA	humid_forest	47.9931	13.1032	511	-0.670322	-0.192509	0.571707	0.0359711	0.18471	1.72805	1.16619	0.126717	0.466097	-0.394385	0.837606	0.597154	-0.38787	0.117283	-0.058377	2.3938	2.8875	1.93087	0.531976	3.06663	2.13247	3.42538	1.72695	4925	1525	416	1361	407
1	cassubicifolius	LH007	LH007_G_08	LH007_G_08_RT_03	garden	LH007_08_03	RT	2N	1_sexual	10	0.647666	1	1	1	NA	NA	NA	humid_forest	47.9931	13.1032	511	-0.670322	-0.192509	0.571707	0.0359711	0.18471	1.72805	1.16619	0.126717	0.466097	-0.394385	0.837606	0.597154	-0.38787	0.117283	-0.058377	2.3938	2.8875	1.93087	0.531976	3.06663	2.13247	3.42538	1.72695	4926	1504	450	1361	416
1	cassubicifolius	LH007	LH007_G_08	LH007_G_08_RT_04	garden	LH007_08_04	RT	2N	1_sexual	10	0.647666	1	1	1	NA	NA	NA	humid_forest	47.9931	13.1032	511	-0.670322	-0.192509	0.571707	0.0359711	0.18471	1.72805	1.16619	0.126717	0.466097	-0.394385	0.837606	0.597154	-0.38787	0.117283	-0.058377	2.3938	2.8875	1.93087	0.531976	3.06663	2.13247	3.42538	1.72695	4927	1495	382	1290	407
1	cassubicifolius	LH007	LH007_G_08	LH007_G_08_SL_01	garden	LH007_08_11052018_1	SL	2N	1_sexual	10	0.647666	1	1	1	NA	NA	NA	humid_forest	47.9931	13.1032	511	-0.670322	-0.192509	0.571707	0.0359711	0.18471	1.72805	1.16619	0.126717	0.466097	-0.394385	0.837606	0.597154	-0.38787	0.117283	-0.058377	2.3938	2.8875	1.93087	0.531976	3.06663	2.13247	3.42538	1.72695	8774	249	72	234	78
1	cassubicifolius	LH007	LH007_G_08	LH007_G_08_SL_02	garden	LH007_08_11052018_2	SL	2N	1_sexual	10	0.647666	1	1	1	NA	NA	NA	humid_forest	47.9931	13.1032	511	-0.670322	-0.192509	0.571707	0.0359711	0.18471	1.72805	1.16619	0.126717	0.466097	-0.394385	0.837606	0.597154	-0.38787	0.117283	-0.058377	2.3938	2.8875	1.93087	0.531976	3.06663	2.13247	3.42538	1.72695	8775	174	77	169	86
1	cassubicifolius	LH007	LH007_G_08	LH007_G_08_SL_03	garden	LH007_08_11052018_3	SL	2N	1_sexual	10	0.647666	1	1	1	NA	NA	NA	humid_forest	47.9931	13.1032	511	-0.670322	-0.192509	0.571707	0.0359711	0.18471	1.72805	1.16619	0.126717	0.466097	-0.394385	0.837606	0.597154	-0.38787	0.117283	-0.058377	2.3938	2.8875	1.93087	0.531976	3.06663	2.13247	3.42538	1.72695	8776	81	95	72	102
1	cassubicifolius	LH007	LH007_G_09	LH007_G_09_BL_01	garden	LH007_09_11052018_1	BL	2N	1_sexual	10	0.647666	1	1	1	NA	NA	NA	humid_forest	47.9931	13.1032	511	-0.670322	-0.192509	0.571707	0.0359711	0.18471	1.72805	1.16619	0.126717	0.466097	-0.394385	0.837606	0.597154	-0.38787	0.117283	-0.058377	2.3938	2.8875	1.93087	0.531976	3.06663	2.13247	3.42538	1.72695	501	496	255	465	291
1	cassubicifolius	LH007	LH007_G_09	LH007_G_09_BL_02	garden	LH007_09_R_cassubicifolius_BL_2	BL	2N	1_sexual	10	0.647666	1	1	1	NA	NA	NA	humid_forest	47.9931	13.1032	511	-0.670322	-0.192509	0.571707	0.0359711	0.18471	1.72805	1.16619	0.126717	0.466097	-0.394385	0.837606	0.597154	-0.38787	0.117283	-0.058377	2.3938	2.8875	1.93087	0.531976	3.06663	2.13247	3.42538	1.72695	502	813	392	709	438
1	cassubicifolius	LH007	LH007_G_09	LH007_G_09_BL_03	garden	LH007_09_R_cassubicifolius_BL_3	BL	2N	1_sexual	10	0.647666	1	1	1	NA	NA	NA	humid_forest	47.9931	13.1032	511	-0.670322	-0.192509	0.571707	0.0359711	0.18471	1.72805	1.16619	0.126717	0.466097	-0.394385	0.837606	0.597154	-0.38787	0.117283	-0.058377	2.3938	2.8875	1.93087	0.531976	3.06663	2.13247	3.42538	1.72695	503	749	492	660	533
1	cassubicifolius	LH007	LH007_G_09	LH007_G_09_RT_01	garden	LH007_09_01	RT	2N	1_sexual	10	0.647666	1	1	1	NA	NA	NA	humid_forest	47.9931	13.1032	511	-0.670322	-0.192509	0.571707	0.0359711	0.18471	1.72805	1.16619	0.126717	0.466097	-0.394385	0.837606	0.597154	-0.38787	0.117283	-0.058377	2.3938	2.8875	1.93087	0.531976	3.06663	2.13247	3.42538	1.72695	4928	1501	241	1293	292
1	cassubicifolius	LH007	LH007_G_09	LH007_G_09_RT_02	garden	LH007_09_02	RT	2N	1_sexual	10	0.647666	1	1	1	NA	NA	NA	humid_forest	47.9931	13.1032	511	-0.670322	-0.192509	0.571707	0.0359711	0.18471	1.72805	1.16619	0.126717	0.466097	-0.394385	0.837606	0.597154	-0.38787	0.117283	-0.058377	2.3938	2.8875	1.93087	0.531976	3.06663	2.13247	3.42538	1.72695	4929	1527	233	1316	258
1	cassubicifolius	LH007	LH007_G_09	LH007_G_09_RT_03	garden	LH007_09_03	RT	2N	1_sexual	10	0.647666	1	1	1	NA	NA	NA	humid_forest	47.9931	13.1032	511	-0.670322	-0.192509	0.571707	0.0359711	0.18471	1.72805	1.16619	0.126717	0.466097	-0.394385	0.837606	0.597154	-0.38787	0.117283	-0.058377	2.3938	2.8875	1.93087	0.531976	3.06663	2.13247	3.42538	1.72695	4930	1548	503	1401	481
1	cassubicifolius	LH007	LH007_G_09	LH007_G_09_RT_04	garden	LH007_09_04	RT	2N	1_sexual	10	0.647666	1	1	1	NA	NA	NA	humid_forest	47.9931	13.1032	511	-0.670322	-0.192509	0.571707	0.0359711	0.18471	1.72805	1.16619	0.126717	0.466097	-0.394385	0.837606	0.597154	-0.38787	0.117283	-0.058377	2.3938	2.8875	1.93087	0.531976	3.06663	2.13247	3.42538	1.72695	4931	1545	611	1380	533
1	cassubicifolius	LH007	LH007_G_09	LH007_G_09_RT_05	garden	LH007_09_05	RT	2N	1_sexual	10	0.647666	1	1	1	NA	NA	NA	humid_forest	47.9931	13.1032	511	-0.670322	-0.192509	0.571707	0.0359711	0.18471	1.72805	1.16619	0.126717	0.466097	-0.394385	0.837606	0.597154	-0.38787	0.117283	-0.058377	2.3938	2.8875	1.93087	0.531976	3.06663	2.13247	3.42538	1.72695	4932	1676	343	1504	319
1	cassubicifolius	LH007	LH007_G_09	LH007_G_09_RT_06	garden	LH007_09_06	RT	2N	1_sexual	10	0.647666	1	1	1	NA	NA	NA	humid_forest	47.9931	13.1032	511	-0.670322	-0.192509	0.571707	0.0359711	0.18471	1.72805	1.16619	0.126717	0.466097	-0.394385	0.837606	0.597154	-0.38787	0.117283	-0.058377	2.3938	2.8875	1.93087	0.531976	3.06663	2.13247	3.42538	1.72695	4933	1644	372	1501	333
1	cassubicifolius	LH007	LH007_G_09	LH007_G_09_SL_02	garden	LH007_09_R_cassubicifolius_SL_2	SL	2N	1_sexual	10	0.647666	1	1	1	NA	NA	NA	humid_forest	47.9931	13.1032	511	-0.670322	-0.192509	0.571707	0.0359711	0.18471	1.72805	1.16619	0.126717	0.466097	-0.394385	0.837606	0.597154	-0.38787	0.117283	-0.058377	2.3938	2.8875	1.93087	0.531976	3.06663	2.13247	3.42538	1.72695	8777	157	64	149	64
1	cassubicifolius	LH007	LH007_G_10	LH007_G_10_BL_01	garden	LH007_10_11052018_1	BL	2N	1_sexual	10	0.647666	1	1	1	NA	NA	NA	humid_forest	47.9931	13.1032	511	-0.670322	-0.192509	0.571707	0.0359711	0.18471	1.72805	1.16619	0.126717	0.466097	-0.394385	0.837606	0.597154	-0.38787	0.117283	-0.058377	2.3938	2.8875	1.93087	0.531976	3.06663	2.13247	3.42538	1.72695	504	425	280	382	308
1	cassubicifolius	LH007	LH007_G_10	LH007_G_10_RT_01	garden	LH007_10_01	RT	2N	1_sexual	10	0.647666	1	1	1	NA	NA	NA	humid_forest	47.9931	13.1032	511	-0.670322	-0.192509	0.571707	0.0359711	0.18471	1.72805	1.16619	0.126717	0.466097	-0.394385	0.837606	0.597154	-0.38787	0.117283	-0.058377	2.3938	2.8875	1.93087	0.531976	3.06663	2.13247	3.42538	1.72695	4934	1504	644	1332	584
1	cassubicifolius	LH007	LH007_G_10	LH007_G_10_RT_02	garden	LH007_10_02	RT	2N	1_sexual	10	0.647666	1	1	1	NA	NA	NA	humid_forest	47.9931	13.1032	511	-0.670322	-0.192509	0.571707	0.0359711	0.18471	1.72805	1.16619	0.126717	0.466097	-0.394385	0.837606	0.597154	-0.38787	0.117283	-0.058377	2.3938	2.8875	1.93087	0.531976	3.06663	2.13247	3.42538	1.72695	4935	1520	322	1323	299
1	cassubicifolius	LH007	LH007_G_10	LH007_G_10_RT_03	garden	LH007_10_03	RT	2N	1_sexual	10	0.647666	1	1	1	NA	NA	NA	humid_forest	47.9931	13.1032	511	-0.670322	-0.192509	0.571707	0.0359711	0.18471	1.72805	1.16619	0.126717	0.466097	-0.394385	0.837606	0.597154	-0.38787	0.117283	-0.058377	2.3938	2.8875	1.93087	0.531976	3.06663	2.13247	3.42538	1.72695	4936	1554	492	1400	542
1	cassubicifolius	LH007	LH007_G_11	LH007_G_11_BL_01	garden	LH007_11_11052018_1	BL	2N	1_sexual	10	0.647666	1	1	1	NA	NA	NA	humid_forest	47.9931	13.1032	511	-0.670322	-0.192509	0.571707	0.0359711	0.18471	1.72805	1.16619	0.126717	0.466097	-0.394385	0.837606	0.597154	-0.38787	0.117283	-0.058377	2.3938	2.8875	1.93087	0.531976	3.06663	2.13247	3.42538	1.72695	505	492	436	472	444
1	cassubicifolius	LH007	LH007_G_11	LH007_G_11_BL_01	garden	LH007_11_R_cassubicifolius_BL_1	BL	2N	1_sexual	10	0.647666	1	1	1	NA	NA	NA	humid_forest	47.9931	13.1032	511	-0.670322	-0.192509	0.571707	0.0359711	0.18471	1.72805	1.16619	0.126717	0.466097	-0.394385	0.837606	0.597154	-0.38787	0.117283	-0.058377	2.3938	2.8875	1.93087	0.531976	3.06663	2.13247	3.42538	1.72695	506	426	249	373	261
1	cassubicifolius	LH007	LH007_G_11	LH007_G_11_BL_02	garden	LH007_11_11052018_2	BL	2N	1_sexual	10	0.647666	1	1	1	NA	NA	NA	humid_forest	47.9931	13.1032	511	-0.670322	-0.192509	0.571707	0.0359711	0.18471	1.72805	1.16619	0.126717	0.466097	-0.394385	0.837606	0.597154	-0.38787	0.117283	-0.058377	2.3938	2.8875	1.93087	0.531976	3.06663	2.13247	3.42538	1.72695	507	431	283	415	302
1	cassubicifolius	LH007	LH007_G_11	LH007_G_11_BL_02	garden	LH007_11_R_cassubicifolius_BL_2	BL	2N	1_sexual	10	0.647666	1	1	1	NA	NA	NA	humid_forest	47.9931	13.1032	511	-0.670322	-0.192509	0.571707	0.0359711	0.18471	1.72805	1.16619	0.126717	0.466097	-0.394385	0.837606	0.597154	-0.38787	0.117283	-0.058377	2.3938	2.8875	1.93087	0.531976	3.06663	2.13247	3.42538	1.72695	508	538	399	485	414
1	cassubicifolius	LH007	LH007_G_11	LH007_G_11_BL_03	garden	LH007_11_R_cassubicifolius_BL_3	BL	2N	1_sexual	10	0.647666	1	1	1	NA	NA	NA	humid_forest	47.9931	13.1032	511	-0.670322	-0.192509	0.571707	0.0359711	0.18471	1.72805	1.16619	0.126717	0.466097	-0.394385	0.837606	0.597154	-0.38787	0.117283	-0.058377	2.3938	2.8875	1.93087	0.531976	3.06663	2.13247	3.42538	1.72695	509	647	372	591	383
1	cassubicifolius	LH007	LH007_G_11	LH007_G_11_RT_01	garden	LH007_11_01	RT	2N	1_sexual	10	0.647666	1	1	1	NA	NA	NA	humid_forest	47.9931	13.1032	511	-0.670322	-0.192509	0.571707	0.0359711	0.18471	1.72805	1.16619	0.126717	0.466097	-0.394385	0.837606	0.597154	-0.38787	0.117283	-0.058377	2.3938	2.8875	1.93087	0.531976	3.06663	2.13247	3.42538	1.72695	4937	1495	457	1400	430
1	cassubicifolius	LH007	LH007_G_11	LH007_G_11_RT_02	garden	LH007_11_02	RT	2N	1_sexual	10	0.647666	1	1	1	NA	NA	NA	humid_forest	47.9931	13.1032	511	-0.670322	-0.192509	0.571707	0.0359711	0.18471	1.72805	1.16619	0.126717	0.466097	-0.394385	0.837606	0.597154	-0.38787	0.117283	-0.058377	2.3938	2.8875	1.93087	0.531976	3.06663	2.13247	3.42538	1.72695	4938	1479	373	1284	396
1	cassubicifolius	LH007	LH007_G_11	LH007_G_11_RT_03	garden	LH007_11_03	RT	2N	1_sexual	10	0.647666	1	1	1	NA	NA	NA	humid_forest	47.9931	13.1032	511	-0.670322	-0.192509	0.571707	0.0359711	0.18471	1.72805	1.16619	0.126717	0.466097	-0.394385	0.837606	0.597154	-0.38787	0.117283	-0.058377	2.3938	2.8875	1.93087	0.531976	3.06663	2.13247	3.42538	1.72695	4939	1532	563	1415	508
1	cassubicifolius	LH007	LH007_G_11	LH007_G_11_RT_04	garden	LH007_11_04	RT	2N	1_sexual	10	0.647666	1	1	1	NA	NA	NA	humid_forest	47.9931	13.1032	511	-0.670322	-0.192509	0.571707	0.0359711	0.18471	1.72805	1.16619	0.126717	0.466097	-0.394385	0.837606	0.597154	-0.38787	0.117283	-0.058377	2.3938	2.8875	1.93087	0.531976	3.06663	2.13247	3.42538	1.72695	4940	1547	494	1446	492
1	cassubicifolius	LH007	LH007_G_11	LH007_G_11_RT_05	garden	LH007_11_05	RT	2N	1_sexual	10	0.647666	1	1	1	NA	NA	NA	humid_forest	47.9931	13.1032	511	-0.670322	-0.192509	0.571707	0.0359711	0.18471	1.72805	1.16619	0.126717	0.466097	-0.394385	0.837606	0.597154	-0.38787	0.117283	-0.058377	2.3938	2.8875	1.93087	0.531976	3.06663	2.13247	3.42538	1.72695	4941	1651	485	1520	395
1	cassubicifolius	LH007	LH007_G_11	LH007_G_11_SL_01	garden	LH007_11_11052018_1	SL	2N	1_sexual	10	0.647666	1	1	1	NA	NA	NA	humid_forest	47.9931	13.1032	511	-0.670322	-0.192509	0.571707	0.0359711	0.18471	1.72805	1.16619	0.126717	0.466097	-0.394385	0.837606	0.597154	-0.38787	0.117283	-0.058377	2.3938	2.8875	1.93087	0.531976	3.06663	2.13247	3.42538	1.72695	8778	150	99	139	106
1	cassubicifolius	LH007	LH007_G_11	LH007_G_11_SL_01	garden	LH007_11_R_cassubicifolius_SL_1	SL	2N	1_sexual	10	0.647666	1	1	1	NA	NA	NA	humid_forest	47.9931	13.1032	511	-0.670322	-0.192509	0.571707	0.0359711	0.18471	1.72805	1.16619	0.126717	0.466097	-0.394385	0.837606	0.597154	-0.38787	0.117283	-0.058377	2.3938	2.8875	1.93087	0.531976	3.06663	2.13247	3.42538	1.72695	8779	155	75	147	68
1	cassubicifolius	LH007	LH007_G_11	LH007_G_11_SL_02	garden	LH007_11_11052018_2	SL	2N	1_sexual	10	0.647666	1	1	1	NA	NA	NA	humid_forest	47.9931	13.1032	511	-0.670322	-0.192509	0.571707	0.0359711	0.18471	1.72805	1.16619	0.126717	0.466097	-0.394385	0.837606	0.597154	-0.38787	0.117283	-0.058377	2.3938	2.8875	1.93087	0.531976	3.06663	2.13247	3.42538	1.72695	8780	165	100	151	104
1	cassubicifolius	LH007	LH007_G_11	LH007_G_11_SL_02	garden	LH007_11_R_cassubicifolius_SL_2	SL	2N	1_sexual	10	0.647666	1	1	1	NA	NA	NA	humid_forest	47.9931	13.1032	511	-0.670322	-0.192509	0.571707	0.0359711	0.18471	1.72805	1.16619	0.126717	0.466097	-0.394385	0.837606	0.597154	-0.38787	0.117283	-0.058377	2.3938	2.8875	1.93087	0.531976	3.06663	2.13247	3.42538	1.72695	8781	150	43	135	42
1	cassubicifolius	LH007	LH007_G_11	LH007_G_11_SL_03	garden	LH007_11_11052018_3	SL	2N	1_sexual	10	0.647666	1	1	1	NA	NA	NA	humid_forest	47.9931	13.1032	511	-0.670322	-0.192509	0.571707	0.0359711	0.18471	1.72805	1.16619	0.126717	0.466097	-0.394385	0.837606	0.597154	-0.38787	0.117283	-0.058377	2.3938	2.8875	1.93087	0.531976	3.06663	2.13247	3.42538	1.72695	8782	145	106	127	124
1	cassubicifolius	LH007	LH007_G_11	LH007_G_11_SL_03	garden	LH007_11_R_cassubicifolius_SL_3	SL	2N	1_sexual	10	0.647666	1	1	1	NA	NA	NA	humid_forest	47.9931	13.1032	511	-0.670322	-0.192509	0.571707	0.0359711	0.18471	1.72805	1.16619	0.126717	0.466097	-0.394385	0.837606	0.597154	-0.38787	0.117283	-0.058377	2.3938	2.8875	1.93087	0.531976	3.06663	2.13247	3.42538	1.72695	8783	97	63	84	56
1	cassubicifolius	LH007	LH007_G_12	LH007_G_12_BL_01	garden	LH007_12_11052018_1	BL	2N	1_sexual	10	0.647666	1	1	1	NA	NA	NA	humid_forest	47.9931	13.1032	511	-0.670322	-0.192509	0.571707	0.0359711	0.18471	1.72805	1.16619	0.126717	0.466097	-0.394385	0.837606	0.597154	-0.38787	0.117283	-0.058377	2.3938	2.8875	1.93087	0.531976	3.06663	2.13247	3.42538	1.72695	510	450	251	380	287
1	cassubicifolius	LH007	LH007_G_12	LH007_G_12_BL_01	garden	LH007_12_R_cassubicifolius_BL_1	BL	2N	1_sexual	10	0.647666	1	1	1	NA	NA	NA	humid_forest	47.9931	13.1032	511	-0.670322	-0.192509	0.571707	0.0359711	0.18471	1.72805	1.16619	0.126717	0.466097	-0.394385	0.837606	0.597154	-0.38787	0.117283	-0.058377	2.3938	2.8875	1.93087	0.531976	3.06663	2.13247	3.42538	1.72695	511	724	465	630	488
1	cassubicifolius	LH007	LH007_G_12	LH007_G_12_BL_02	garden	LH007_12_R_cassubicifolius_BL_2	BL	2N	1_sexual	10	0.647666	1	1	1	NA	NA	NA	humid_forest	47.9931	13.1032	511	-0.670322	-0.192509	0.571707	0.0359711	0.18471	1.72805	1.16619	0.126717	0.466097	-0.394385	0.837606	0.597154	-0.38787	0.117283	-0.058377	2.3938	2.8875	1.93087	0.531976	3.06663	2.13247	3.42538	1.72695	512	651	450	556	470
1	cassubicifolius	LH007	LH007_G_12	LH007_G_12_BL_03	garden	LH007_12_R_cassubicifolius_BL_3	BL	2N	1_sexual	10	0.647666	1	1	1	NA	NA	NA	humid_forest	47.9931	13.1032	511	-0.670322	-0.192509	0.571707	0.0359711	0.18471	1.72805	1.16619	0.126717	0.466097	-0.394385	0.837606	0.597154	-0.38787	0.117283	-0.058377	2.3938	2.8875	1.93087	0.531976	3.06663	2.13247	3.42538	1.72695	513	687	462	623	465
1	cassubicifolius	LH007	LH007_G_12	LH007_G_12_RT_01	garden	LH007_12_01	RT	2N	1_sexual	10	0.647666	1	1	1	NA	NA	NA	humid_forest	47.9931	13.1032	511	-0.670322	-0.192509	0.571707	0.0359711	0.18471	1.72805	1.16619	0.126717	0.466097	-0.394385	0.837606	0.597154	-0.38787	0.117283	-0.058377	2.3938	2.8875	1.93087	0.531976	3.06663	2.13247	3.42538	1.72695	4942	1410	694	1258	627
1	cassubicifolius	LH007	LH007_G_12	LH007_G_12_RT_02	garden	LH007_12_02	RT	2N	1_sexual	10	0.647666	1	1	1	NA	NA	NA	humid_forest	47.9931	13.1032	511	-0.670322	-0.192509	0.571707	0.0359711	0.18471	1.72805	1.16619	0.126717	0.466097	-0.394385	0.837606	0.597154	-0.38787	0.117283	-0.058377	2.3938	2.8875	1.93087	0.531976	3.06663	2.13247	3.42538	1.72695	4943	1539	513	1412	437
1	cassubicifolius	LH007	LH007_G_12	LH007_G_12_RT_03	garden	LH007_12_03	RT	2N	1_sexual	10	0.647666	1	1	1	NA	NA	NA	humid_forest	47.9931	13.1032	511	-0.670322	-0.192509	0.571707	0.0359711	0.18471	1.72805	1.16619	0.126717	0.466097	-0.394385	0.837606	0.597154	-0.38787	0.117283	-0.058377	2.3938	2.8875	1.93087	0.531976	3.06663	2.13247	3.42538	1.72695	4944	1474	416	1277	379
1	cassubicifolius	LH007	LH007_G_12	LH007_G_12_RT_04	garden	LH007_12_04	RT	2N	1_sexual	10	0.647666	1	1	1	NA	NA	NA	humid_forest	47.9931	13.1032	511	-0.670322	-0.192509	0.571707	0.0359711	0.18471	1.72805	1.16619	0.126717	0.466097	-0.394385	0.837606	0.597154	-0.38787	0.117283	-0.058377	2.3938	2.8875	1.93087	0.531976	3.06663	2.13247	3.42538	1.72695	4945	1516	451	1350	411
1	cassubicifolius	LH007	LH007_G_12	LH007_G_12_RT_05	garden	LH007_12_05	RT	2N	1_sexual	10	0.647666	1	1	1	NA	NA	NA	humid_forest	47.9931	13.1032	511	-0.670322	-0.192509	0.571707	0.0359711	0.18471	1.72805	1.16619	0.126717	0.466097	-0.394385	0.837606	0.597154	-0.38787	0.117283	-0.058377	2.3938	2.8875	1.93087	0.531976	3.06663	2.13247	3.42538	1.72695	4946	1630	519	1488	485
1	cassubicifolius	LH007	LH007_G_12	LH007_G_12_SL_01	garden	LH007_12_11052018_1	SL	2N	1_sexual	10	0.647666	1	1	1	NA	NA	NA	humid_forest	47.9931	13.1032	511	-0.670322	-0.192509	0.571707	0.0359711	0.18471	1.72805	1.16619	0.126717	0.466097	-0.394385	0.837606	0.597154	-0.38787	0.117283	-0.058377	2.3938	2.8875	1.93087	0.531976	3.06663	2.13247	3.42538	1.72695	8784	135	77	124	86
1	cassubicifolius	LH007	LH007_G_12	LH007_G_12_SL_01	garden	LH007_12_R_cassubicifolius_SL_1	SL	2N	1_sexual	10	0.647666	1	1	1	NA	NA	NA	humid_forest	47.9931	13.1032	511	-0.670322	-0.192509	0.571707	0.0359711	0.18471	1.72805	1.16619	0.126717	0.466097	-0.394385	0.837606	0.597154	-0.38787	0.117283	-0.058377	2.3938	2.8875	1.93087	0.531976	3.06663	2.13247	3.42538	1.72695	8785	98	57	87	70
1	cassubicifolius	LH007	LH007_G_12	LH007_G_12_SL_02	garden	LH007_12_R_cassubicifolius_SL_2	SL	2N	1_sexual	10	0.647666	1	1	1	NA	NA	NA	humid_forest	47.9931	13.1032	511	-0.670322	-0.192509	0.571707	0.0359711	0.18471	1.72805	1.16619	0.126717	0.466097	-0.394385	0.837606	0.597154	-0.38787	0.117283	-0.058377	2.3938	2.8875	1.93087	0.531976	3.06663	2.13247	3.42538	1.72695	8786	295	118	279	115
1	cassubicifolius	LH007	LH007_G_12	LH007_G_12_SL_03	garden	LH007_12_R_cassubicifolius_SL_3	SL	2N	1_sexual	10	0.647666	1	1	1	NA	NA	NA	humid_forest	47.9931	13.1032	511	-0.670322	-0.192509	0.571707	0.0359711	0.18471	1.72805	1.16619	0.126717	0.466097	-0.394385	0.837606	0.597154	-0.38787	0.117283	-0.058377	2.3938	2.8875	1.93087	0.531976	3.06663	2.13247	3.42538	1.72695	8787	230	58	215	56
1	cassubicifolius	LH007	LH007_G_13	LH007_G_13_BL_01	garden	LH007_13_R_cassubicifolius_BL_1	BL	2N	1_sexual	10	0.647666	1	1	1	NA	NA	NA	humid_forest	47.9931	13.1032	511	-0.670322	-0.192509	0.571707	0.0359711	0.18471	1.72805	1.16619	0.126717	0.466097	-0.394385	0.837606	0.597154	-0.38787	0.117283	-0.058377	2.3938	2.8875	1.93087	0.531976	3.06663	2.13247	3.42538	1.72695	514	939	555	857	585
1	cassubicifolius	LH007	LH007_G_13	LH007_G_13_BL_02	garden	LH007_13_R_cassubicifolius_BL_2	BL	2N	1_sexual	10	0.647666	1	1	1	NA	NA	NA	humid_forest	47.9931	13.1032	511	-0.670322	-0.192509	0.571707	0.0359711	0.18471	1.72805	1.16619	0.126717	0.466097	-0.394385	0.837606	0.597154	-0.38787	0.117283	-0.058377	2.3938	2.8875	1.93087	0.531976	3.06663	2.13247	3.42538	1.72695	515	799	500	723	530
1	cassubicifolius	LH007	LH007_G_13	LH007_G_13_BL_03	garden	LH007_13_R_cassubicifolius_BL_3	BL	2N	1_sexual	10	0.647666	1	1	1	NA	NA	NA	humid_forest	47.9931	13.1032	511	-0.670322	-0.192509	0.571707	0.0359711	0.18471	1.72805	1.16619	0.126717	0.466097	-0.394385	0.837606	0.597154	-0.38787	0.117283	-0.058377	2.3938	2.8875	1.93087	0.531976	3.06663	2.13247	3.42538	1.72695	516	736	370	671	399
1	cassubicifolius	LH007	LH007_G_13	LH007_G_13_RT_01	garden	LH007_13_01	RT	2N	1_sexual	10	0.647666	1	1	1	NA	NA	NA	humid_forest	47.9931	13.1032	511	-0.670322	-0.192509	0.571707	0.0359711	0.18471	1.72805	1.16619	0.126717	0.466097	-0.394385	0.837606	0.597154	-0.38787	0.117283	-0.058377	2.3938	2.8875	1.93087	0.531976	3.06663	2.13247	3.42538	1.72695	4947	1483	308	1295	322
1	cassubicifolius	LH007	LH007_G_13	LH007_G_13_RT_02	garden	LH007_13_02	RT	2N	1_sexual	10	0.647666	1	1	1	NA	NA	NA	humid_forest	47.9931	13.1032	511	-0.670322	-0.192509	0.571707	0.0359711	0.18471	1.72805	1.16619	0.126717	0.466097	-0.394385	0.837606	0.597154	-0.38787	0.117283	-0.058377	2.3938	2.8875	1.93087	0.531976	3.06663	2.13247	3.42538	1.72695	4948	1626	198	1415	281
1	cassubicifolius	LH007	LH007_G_13	LH007_G_13_RT_03	garden	LH007_13_03	RT	2N	1_sexual	10	0.647666	1	1	1	NA	NA	NA	humid_forest	47.9931	13.1032	511	-0.670322	-0.192509	0.571707	0.0359711	0.18471	1.72805	1.16619	0.126717	0.466097	-0.394385	0.837606	0.597154	-0.38787	0.117283	-0.058377	2.3938	2.8875	1.93087	0.531976	3.06663	2.13247	3.42538	1.72695	4949	1570	519	1373	396
1	cassubicifolius	LH007	LH007_G_13	LH007_G_13_SL_01	garden	LH007_13_11052018_1	SL	2N	1_sexual	10	0.647666	1	1	1	NA	NA	NA	humid_forest	47.9931	13.1032	511	-0.670322	-0.192509	0.571707	0.0359711	0.18471	1.72805	1.16619	0.126717	0.466097	-0.394385	0.837606	0.597154	-0.38787	0.117283	-0.058377	2.3938	2.8875	1.93087	0.531976	3.06663	2.13247	3.42538	1.72695	8788	143	90	135	89
1	cassubicifolius	LH007	LH007_G_13	LH007_G_13_SL_01	garden	LH007_13_R_cassubicifolius_SL_1	SL	2N	1_sexual	10	0.647666	1	1	1	NA	NA	NA	humid_forest	47.9931	13.1032	511	-0.670322	-0.192509	0.571707	0.0359711	0.18471	1.72805	1.16619	0.126717	0.466097	-0.394385	0.837606	0.597154	-0.38787	0.117283	-0.058377	2.3938	2.8875	1.93087	0.531976	3.06663	2.13247	3.42538	1.72695	8789	225	37	217	37
1	cassubicifolius	LH007	LH007_G_13	LH007_G_13_SL_02	garden	LH007_13_R_cassubicifolius_SL_2	SL	2N	1_sexual	10	0.647666	1	1	1	NA	NA	NA	humid_forest	47.9931	13.1032	511	-0.670322	-0.192509	0.571707	0.0359711	0.18471	1.72805	1.16619	0.126717	0.466097	-0.394385	0.837606	0.597154	-0.38787	0.117283	-0.058377	2.3938	2.8875	1.93087	0.531976	3.06663	2.13247	3.42538	1.72695	8790	169	66	158	62
1	cassubicifolius	LH007	LH007_G_13	LH007_G_13_SL_03	garden	LH007_13_R_cassubicifolius_SL_3	SL	2N	1_sexual	10	0.647666	1	1	1	NA	NA	NA	humid_forest	47.9931	13.1032	511	-0.670322	-0.192509	0.571707	0.0359711	0.18471	1.72805	1.16619	0.126717	0.466097	-0.394385	0.837606	0.597154	-0.38787	0.117283	-0.058377	2.3938	2.8875	1.93087	0.531976	3.06663	2.13247	3.42538	1.72695	8791	94	37	81	37
1	cassubicifolius	LH016	LH016_G_01	LH016_G_01_BL_01	garden	LH16_01_04052018_1	BL	2N	1_sexual	15	0.444998	1	1	1	1	1	1	streamside	46.0108	14.1027	514	-1.04147	-0.0291042	0.579759	0.754055	0.628602	0.432473	0.159436	-0.118424	0.705832	0.315225	0.234626	-1.52415	-0.156378	0.646112	0.505185	2.85155	1.91523	2.6415	-1.20778	2.1859	2.42492	2.01511	2.24093	517	508	287	469	306
1	cassubicifolius	LH016	LH016_G_01	LH016_G_01_RT_01	garden	LH16_01_01	RT	2N	1_sexual	15	0.444998	1	1	1	1	1	1	streamside	46.0108	14.1027	514	-1.04147	-0.0291042	0.579759	0.754055	0.628602	0.432473	0.159436	-0.118424	0.705832	0.315225	0.234626	-1.52415	-0.156378	0.646112	0.505185	2.85155	1.91523	2.6415	-1.20778	2.1859	2.42492	2.01511	2.24093	4950	1564	625	1382	577
1	cassubicifolius	LH016	LH016_G_01	LH016_G_01_RT_02	garden	LH16_01_02	RT	2N	1_sexual	15	0.444998	1	1	1	1	1	1	streamside	46.0108	14.1027	514	-1.04147	-0.0291042	0.579759	0.754055	0.628602	0.432473	0.159436	-0.118424	0.705832	0.315225	0.234626	-1.52415	-0.156378	0.646112	0.505185	2.85155	1.91523	2.6415	-1.20778	2.1859	2.42492	2.01511	2.24093	4951	1495	193	1398	156
1	cassubicifolius	LH016	LH016_G_01	LH016_G_01_RT_03	garden	LH16_01_03	RT	2N	1_sexual	15	0.444998	1	1	1	1	1	1	streamside	46.0108	14.1027	514	-1.04147	-0.0291042	0.579759	0.754055	0.628602	0.432473	0.159436	-0.118424	0.705832	0.315225	0.234626	-1.52415	-0.156378	0.646112	0.505185	2.85155	1.91523	2.6415	-1.20778	2.1859	2.42492	2.01511	2.24093	4952	1486	497	1311	487
1	cassubicifolius	LH016	LH016_G_03	LH016_G_03_BL_01	garden	LH16_03_25042018_1	BL	2N	1_sexual	15	0.444998	1	1	1	1	1	1	streamside	46.0108	14.1027	514	-1.04147	-0.0291042	0.579759	0.754055	0.628602	0.432473	0.159436	-0.118424	0.705832	0.315225	0.234626	-1.52415	-0.156378	0.646112	0.505185	2.85155	1.91523	2.6415	-1.20778	2.1859	2.42492	2.01511	2.24093	518	489	217	449	225
1	cassubicifolius	LH016	LH016_G_03	LH016_G_03_BL_02	garden	LH016_03_R_cassubicifolius_BL_2	BL	2N	1_sexual	15	0.444998	1	1	1	1	1	1	streamside	46.0108	14.1027	514	-1.04147	-0.0291042	0.579759	0.754055	0.628602	0.432473	0.159436	-0.118424	0.705832	0.315225	0.234626	-1.52415	-0.156378	0.646112	0.505185	2.85155	1.91523	2.6415	-1.20778	2.1859	2.42492	2.01511	2.24093	519	595	437	535	439
1	cassubicifolius	LH016	LH016_G_03	LH016_G_03_BL_03	garden	LH016_03_R_cassubicifolius_BL_3	BL	2N	1_sexual	15	0.444998	1	1	1	1	1	1	streamside	46.0108	14.1027	514	-1.04147	-0.0291042	0.579759	0.754055	0.628602	0.432473	0.159436	-0.118424	0.705832	0.315225	0.234626	-1.52415	-0.156378	0.646112	0.505185	2.85155	1.91523	2.6415	-1.20778	2.1859	2.42492	2.01511	2.24093	520	463	370	439	360
1	cassubicifolius	LH016	LH016_G_03	LH016_G_03_RT_01	garden	LH16_03_01_1x	RT	2N	1_sexual	15	0.444998	1	1	1	1	1	1	streamside	46.0108	14.1027	514	-1.04147	-0.0291042	0.579759	0.754055	0.628602	0.432473	0.159436	-0.118424	0.705832	0.315225	0.234626	-1.52415	-0.156378	0.646112	0.505185	2.85155	1.91523	2.6415	-1.20778	2.1859	2.42492	2.01511	2.24093	4953	1497	359	1362	315
1	cassubicifolius	LH016	LH016_G_03	LH016_G_03_RT_02	garden	LH16_03_02	RT	2N	1_sexual	15	0.444998	1	1	1	1	1	1	streamside	46.0108	14.1027	514	-1.04147	-0.0291042	0.579759	0.754055	0.628602	0.432473	0.159436	-0.118424	0.705832	0.315225	0.234626	-1.52415	-0.156378	0.646112	0.505185	2.85155	1.91523	2.6415	-1.20778	2.1859	2.42492	2.01511	2.24093	4954	1651	265	1479	274
1	cassubicifolius	LH016	LH016_G_03	LH016_G_03_RT_03	garden	LH16_03_03	RT	2N	1_sexual	15	0.444998	1	1	1	1	1	1	streamside	46.0108	14.1027	514	-1.04147	-0.0291042	0.579759	0.754055	0.628602	0.432473	0.159436	-0.118424	0.705832	0.315225	0.234626	-1.52415	-0.156378	0.646112	0.505185	2.85155	1.91523	2.6415	-1.20778	2.1859	2.42492	2.01511	2.24093	4955	1501	503	1352	505
1	cassubicifolius	LH016	LH016_G_03	LH016_G_03_SL_01	garden	LH16_03_25042018_1	SL	2N	1_sexual	15	0.444998	1	1	1	1	1	1	streamside	46.0108	14.1027	514	-1.04147	-0.0291042	0.579759	0.754055	0.628602	0.432473	0.159436	-0.118424	0.705832	0.315225	0.234626	-1.52415	-0.156378	0.646112	0.505185	2.85155	1.91523	2.6415	-1.20778	2.1859	2.42492	2.01511	2.24093	8792	267	74	254	74
1	cassubicifolius	LH016	LH016_G_03	LH016_G_03_SL_01	garden	LH016_03_R_cassubicifolius_SL_1	SL	2N	1_sexual	15	0.444998	1	1	1	1	1	1	streamside	46.0108	14.1027	514	-1.04147	-0.0291042	0.579759	0.754055	0.628602	0.432473	0.159436	-0.118424	0.705832	0.315225	0.234626	-1.52415	-0.156378	0.646112	0.505185	2.85155	1.91523	2.6415	-1.20778	2.1859	2.42492	2.01511	2.24093	8793	213	71	193	86
1	cassubicifolius	LH016	LH016_G_03	LH016_G_03_SL_02	garden	LH16_03_25042018_2	SL	2N	1_sexual	15	0.444998	1	1	1	1	1	1	streamside	46.0108	14.1027	514	-1.04147	-0.0291042	0.579759	0.754055	0.628602	0.432473	0.159436	-0.118424	0.705832	0.315225	0.234626	-1.52415	-0.156378	0.646112	0.505185	2.85155	1.91523	2.6415	-1.20778	2.1859	2.42492	2.01511	2.24093	8794	156	61	149	70
1	cassubicifolius	LH016	LH016_G_04	LH016_G_04_BL_01	garden	LH16_04_24042018_1	BL	2N	1_sexual	15	0.444998	1	1	1	1	1	1	streamside	46.0108	14.1027	514	-1.04147	-0.0291042	0.579759	0.754055	0.628602	0.432473	0.159436	-0.118424	0.705832	0.315225	0.234626	-1.52415	-0.156378	0.646112	0.505185	2.85155	1.91523	2.6415	-1.20778	2.1859	2.42492	2.01511	2.24093	521	503	207	459	225
1	cassubicifolius	LH016	LH016_G_04	LH016_G_04_BL_01	garden	LH016_04_R_cassubicifolius_BL_1	BL	2N	1_sexual	15	0.444998	1	1	1	1	1	1	streamside	46.0108	14.1027	514	-1.04147	-0.0291042	0.579759	0.754055	0.628602	0.432473	0.159436	-0.118424	0.705832	0.315225	0.234626	-1.52415	-0.156378	0.646112	0.505185	2.85155	1.91523	2.6415	-1.20778	2.1859	2.42492	2.01511	2.24093	522	466	316	429	318
1	cassubicifolius	LH016	LH016_G_04	LH016_G_04_BL_02	garden	LH016_04_R_cassubicifolius_BL_2	BL	2N	1_sexual	15	0.444998	1	1	1	1	1	1	streamside	46.0108	14.1027	514	-1.04147	-0.0291042	0.579759	0.754055	0.628602	0.432473	0.159436	-0.118424	0.705832	0.315225	0.234626	-1.52415	-0.156378	0.646112	0.505185	2.85155	1.91523	2.6415	-1.20778	2.1859	2.42492	2.01511	2.24093	523	704	477	662	475
1	cassubicifolius	LH016	LH016_G_04	LH016_G_04_BL_03	garden	LH016_04_R_cassubicifolius_BL_3	BL	2N	1_sexual	15	0.444998	1	1	1	1	1	1	streamside	46.0108	14.1027	514	-1.04147	-0.0291042	0.579759	0.754055	0.628602	0.432473	0.159436	-0.118424	0.705832	0.315225	0.234626	-1.52415	-0.156378	0.646112	0.505185	2.85155	1.91523	2.6415	-1.20778	2.1859	2.42492	2.01511	2.24093	524	704	363	622	407
1	cassubicifolius	LH016	LH016_G_04	LH016_G_04_RT_01	garden	LH16_04_01	RT	2N	1_sexual	15	0.444998	1	1	1	1	1	1	streamside	46.0108	14.1027	514	-1.04147	-0.0291042	0.579759	0.754055	0.628602	0.432473	0.159436	-0.118424	0.705832	0.315225	0.234626	-1.52415	-0.156378	0.646112	0.505185	2.85155	1.91523	2.6415	-1.20778	2.1859	2.42492	2.01511	2.24093	4956	1580	614	1421	586
1	cassubicifolius	LH016	LH016_G_04	LH016_G_04_RT_02	garden	LH16_04_02	RT	2N	1_sexual	15	0.444998	1	1	1	1	1	1	streamside	46.0108	14.1027	514	-1.04147	-0.0291042	0.579759	0.754055	0.628602	0.432473	0.159436	-0.118424	0.705832	0.315225	0.234626	-1.52415	-0.156378	0.646112	0.505185	2.85155	1.91523	2.6415	-1.20778	2.1859	2.42492	2.01511	2.24093	4957	1421	471	1265	478
1	cassubicifolius	LH016	LH016_G_04	LH016_G_04_RT_03	garden	LH16_04_03	RT	2N	1_sexual	15	0.444998	1	1	1	1	1	1	streamside	46.0108	14.1027	514	-1.04147	-0.0291042	0.579759	0.754055	0.628602	0.432473	0.159436	-0.118424	0.705832	0.315225	0.234626	-1.52415	-0.156378	0.646112	0.505185	2.85155	1.91523	2.6415	-1.20778	2.1859	2.42492	2.01511	2.24093	4958	1672	441	1541	432
1	cassubicifolius	LH016	LH016_G_04	LH016_G_04_RT_04	garden	LH16_04_04	RT	2N	1_sexual	15	0.444998	1	1	1	1	1	1	streamside	46.0108	14.1027	514	-1.04147	-0.0291042	0.579759	0.754055	0.628602	0.432473	0.159436	-0.118424	0.705832	0.315225	0.234626	-1.52415	-0.156378	0.646112	0.505185	2.85155	1.91523	2.6415	-1.20778	2.1859	2.42492	2.01511	2.24093	4959	1554	210	1338	249
1	cassubicifolius	LH016	LH016_G_04	LH016_G_04_SL_01	garden	LH16_04_24042018_1	SL	2N	1_sexual	15	0.444998	1	1	1	1	1	1	streamside	46.0108	14.1027	514	-1.04147	-0.0291042	0.579759	0.754055	0.628602	0.432473	0.159436	-0.118424	0.705832	0.315225	0.234626	-1.52415	-0.156378	0.646112	0.505185	2.85155	1.91523	2.6415	-1.20778	2.1859	2.42492	2.01511	2.24093	8795	184	71	170	73
1	cassubicifolius	LH016	LH016_G_04	LH016_G_04_SL_02	garden	LH16_04_24042018_2	SL	2N	1_sexual	15	0.444998	1	1	1	1	1	1	streamside	46.0108	14.1027	514	-1.04147	-0.0291042	0.579759	0.754055	0.628602	0.432473	0.159436	-0.118424	0.705832	0.315225	0.234626	-1.52415	-0.156378	0.646112	0.505185	2.85155	1.91523	2.6415	-1.20778	2.1859	2.42492	2.01511	2.24093	8796	160	75	135	75
1	cassubicifolius	LH016	LH016_G_05	LH016_G_05_BL_02	garden	LH016_05_R_cassubicifolius_BL_2	BL	2N	1_sexual	15	0.444998	1	1	1	1	1	1	streamside	46.0108	14.1027	514	-1.04147	-0.0291042	0.579759	0.754055	0.628602	0.432473	0.159436	-0.118424	0.705832	0.315225	0.234626	-1.52415	-0.156378	0.646112	0.505185	2.85155	1.91523	2.6415	-1.20778	2.1859	2.42492	2.01511	2.24093	525	675	440	588	461
1	cassubicifolius	LH016	LH016_G_05	LH016_G_05_SL_01	garden	LH16_05_04052018_1	SL	2N	1_sexual	15	0.444998	1	1	1	1	1	1	streamside	46.0108	14.1027	514	-1.04147	-0.0291042	0.579759	0.754055	0.628602	0.432473	0.159436	-0.118424	0.705832	0.315225	0.234626	-1.52415	-0.156378	0.646112	0.505185	2.85155	1.91523	2.6415	-1.20778	2.1859	2.42492	2.01511	2.24093	8797	280	130	267	140
1	cassubicifolius	LH016	LH016_G_05	LH016_G_05_SL_01	garden	LH016_05_R_cassubicifolius_SL_1	SL	2N	1_sexual	15	0.444998	1	1	1	1	1	1	streamside	46.0108	14.1027	514	-1.04147	-0.0291042	0.579759	0.754055	0.628602	0.432473	0.159436	-0.118424	0.705832	0.315225	0.234626	-1.52415	-0.156378	0.646112	0.505185	2.85155	1.91523	2.6415	-1.20778	2.1859	2.42492	2.01511	2.24093	8798	163	56	138	52
1	cassubicifolius	LH016	LH016_G_05	LH016_G_05_SL_02	garden	LH016_05_R_cassubicifolius_SL_2	SL	2N	1_sexual	15	0.444998	1	1	1	1	1	1	streamside	46.0108	14.1027	514	-1.04147	-0.0291042	0.579759	0.754055	0.628602	0.432473	0.159436	-0.118424	0.705832	0.315225	0.234626	-1.52415	-0.156378	0.646112	0.505185	2.85155	1.91523	2.6415	-1.20778	2.1859	2.42492	2.01511	2.24093	8799	231	52	212	48
1	cassubicifolius	LH016	LH016_G_06	LH016_G_06_BL_01	garden	LH16_06_25042018_1	BL	2N	1_sexual	15	0.444998	1	1	1	1	1	1	streamside	46.0108	14.1027	514	-1.04147	-0.0291042	0.579759	0.754055	0.628602	0.432473	0.159436	-0.118424	0.705832	0.315225	0.234626	-1.52415	-0.156378	0.646112	0.505185	2.85155	1.91523	2.6415	-1.20778	2.1859	2.42492	2.01511	2.24093	526	537	292	499	311
1	cassubicifolius	LH016	LH016_G_06	LH016_G_06_BL_01	garden	LH016_06_R_cassubicifolius_BL_1	BL	2N	1_sexual	15	0.444998	1	1	1	1	1	1	streamside	46.0108	14.1027	514	-1.04147	-0.0291042	0.579759	0.754055	0.628602	0.432473	0.159436	-0.118424	0.705832	0.315225	0.234626	-1.52415	-0.156378	0.646112	0.505185	2.85155	1.91523	2.6415	-1.20778	2.1859	2.42492	2.01511	2.24093	527	728	503	688	500
1	cassubicifolius	LH016	LH016_G_06	LH016_G_06_BL_02	garden	LH016_06_R_cassubicifolius_BL_2	BL	2N	1_sexual	15	0.444998	1	1	1	1	1	1	streamside	46.0108	14.1027	514	-1.04147	-0.0291042	0.579759	0.754055	0.628602	0.432473	0.159436	-0.118424	0.705832	0.315225	0.234626	-1.52415	-0.156378	0.646112	0.505185	2.85155	1.91523	2.6415	-1.20778	2.1859	2.42492	2.01511	2.24093	528	1054	867	986	863
1	cassubicifolius	LH016	LH016_G_06	LH016_G_06_RT_01	garden	LH16_06_01	RT	2N	1_sexual	15	0.444998	1	1	1	1	1	1	streamside	46.0108	14.1027	514	-1.04147	-0.0291042	0.579759	0.754055	0.628602	0.432473	0.159436	-0.118424	0.705832	0.315225	0.234626	-1.52415	-0.156378	0.646112	0.505185	2.85155	1.91523	2.6415	-1.20778	2.1859	2.42492	2.01511	2.24093	4960	1534	317	1433	248
1	cassubicifolius	LH016	LH016_G_06	LH016_G_06_RT_02	garden	LH16_06_02	RT	2N	1_sexual	15	0.444998	1	1	1	1	1	1	streamside	46.0108	14.1027	514	-1.04147	-0.0291042	0.579759	0.754055	0.628602	0.432473	0.159436	-0.118424	0.705832	0.315225	0.234626	-1.52415	-0.156378	0.646112	0.505185	2.85155	1.91523	2.6415	-1.20778	2.1859	2.42492	2.01511	2.24093	4961	1584	357	1412	308
1	cassubicifolius	LH016	LH016_G_06	LH016_G_06_RT_03	garden	LH16_06_03	RT	2N	1_sexual	15	0.444998	1	1	1	1	1	1	streamside	46.0108	14.1027	514	-1.04147	-0.0291042	0.579759	0.754055	0.628602	0.432473	0.159436	-0.118424	0.705832	0.315225	0.234626	-1.52415	-0.156378	0.646112	0.505185	2.85155	1.91523	2.6415	-1.20778	2.1859	2.42492	2.01511	2.24093	4962	1653	446	1573	281
1	cassubicifolius	LH016	LH016_G_06	LH016_G_06_SL_01	garden	LH16_06_25042018_1	SL	2N	1_sexual	15	0.444998	1	1	1	1	1	1	streamside	46.0108	14.1027	514	-1.04147	-0.0291042	0.579759	0.754055	0.628602	0.432473	0.159436	-0.118424	0.705832	0.315225	0.234626	-1.52415	-0.156378	0.646112	0.505185	2.85155	1.91523	2.6415	-1.20778	2.1859	2.42492	2.01511	2.24093	8800	201	113	184	113
1	cassubicifolius	LH016	LH016_G_06	LH016_G_06_SL_01	garden	LH016_06_R_cassubicifolius_SL_1	SL	2N	1_sexual	15	0.444998	1	1	1	1	1	1	streamside	46.0108	14.1027	514	-1.04147	-0.0291042	0.579759	0.754055	0.628602	0.432473	0.159436	-0.118424	0.705832	0.315225	0.234626	-1.52415	-0.156378	0.646112	0.505185	2.85155	1.91523	2.6415	-1.20778	2.1859	2.42492	2.01511	2.24093	8801	160	52	136	63
1	cassubicifolius	LH016	LH016_G_06	LH016_G_06_SL_02	garden	LH16_06_25042018_2	SL	2N	1_sexual	15	0.444998	1	1	1	1	1	1	streamside	46.0108	14.1027	514	-1.04147	-0.0291042	0.579759	0.754055	0.628602	0.432473	0.159436	-0.118424	0.705832	0.315225	0.234626	-1.52415	-0.156378	0.646112	0.505185	2.85155	1.91523	2.6415	-1.20778	2.1859	2.42492	2.01511	2.24093	8802	175	92	160	100
1	cassubicifolius	LH016	LH016_G_07	LH016_G_07_BL_01	garden	LH16_07_09052018_1	BL	2N	1_sexual	15	0.444998	1	1	1	1	1	1	streamside	46.0108	14.1027	514	-1.04147	-0.0291042	0.579759	0.754055	0.628602	0.432473	0.159436	-0.118424	0.705832	0.315225	0.234626	-1.52415	-0.156378	0.646112	0.505185	2.85155	1.91523	2.6415	-1.20778	2.1859	2.42492	2.01511	2.24093	529	474	223	445	244
1	cassubicifolius	LH016	LH016_G_07	LH016_G_07_BL_01	garden	LH016_07_R_cassubicifolius_BL_1	BL	2N	1_sexual	15	0.444998	1	1	1	1	1	1	streamside	46.0108	14.1027	514	-1.04147	-0.0291042	0.579759	0.754055	0.628602	0.432473	0.159436	-0.118424	0.705832	0.315225	0.234626	-1.52415	-0.156378	0.646112	0.505185	2.85155	1.91523	2.6415	-1.20778	2.1859	2.42492	2.01511	2.24093	530	820	600	738	613
1	cassubicifolius	LH016	LH016_G_07	LH016_G_07_BL_02	garden	LH016_07_R_cassubicifolius_BL_2	BL	2N	1_sexual	15	0.444998	1	1	1	1	1	1	streamside	46.0108	14.1027	514	-1.04147	-0.0291042	0.579759	0.754055	0.628602	0.432473	0.159436	-0.118424	0.705832	0.315225	0.234626	-1.52415	-0.156378	0.646112	0.505185	2.85155	1.91523	2.6415	-1.20778	2.1859	2.42492	2.01511	2.24093	531	571	325	511	333
1	cassubicifolius	LH016	LH016_G_07	LH016_G_07_RT_01	garden	LH16_07_01	RT	2N	1_sexual	15	0.444998	1	1	1	1	1	1	streamside	46.0108	14.1027	514	-1.04147	-0.0291042	0.579759	0.754055	0.628602	0.432473	0.159436	-0.118424	0.705832	0.315225	0.234626	-1.52415	-0.156378	0.646112	0.505185	2.85155	1.91523	2.6415	-1.20778	2.1859	2.42492	2.01511	2.24093	4963	1446	274	1231	329
1	cassubicifolius	LH016	LH016_G_07	LH016_G_07_RT_02	garden	LH16_07_02	RT	2N	1_sexual	15	0.444998	1	1	1	1	1	1	streamside	46.0108	14.1027	514	-1.04147	-0.0291042	0.579759	0.754055	0.628602	0.432473	0.159436	-0.118424	0.705832	0.315225	0.234626	-1.52415	-0.156378	0.646112	0.505185	2.85155	1.91523	2.6415	-1.20778	2.1859	2.42492	2.01511	2.24093	4964	1392	317	1210	334
1	cassubicifolius	LH016	LH016_G_07	LH016_G_07_RT_03	garden	LH16_07_03	RT	2N	1_sexual	15	0.444998	1	1	1	1	1	1	streamside	46.0108	14.1027	514	-1.04147	-0.0291042	0.579759	0.754055	0.628602	0.432473	0.159436	-0.118424	0.705832	0.315225	0.234626	-1.52415	-0.156378	0.646112	0.505185	2.85155	1.91523	2.6415	-1.20778	2.1859	2.42492	2.01511	2.24093	4965	1690	94	1492	95
1	cassubicifolius	LH016	LH016_G_07	LH016_G_07_RT_04	garden	LH16_07_04	RT	2N	1_sexual	15	0.444998	1	1	1	1	1	1	streamside	46.0108	14.1027	514	-1.04147	-0.0291042	0.579759	0.754055	0.628602	0.432473	0.159436	-0.118424	0.705832	0.315225	0.234626	-1.52415	-0.156378	0.646112	0.505185	2.85155	1.91523	2.6415	-1.20778	2.1859	2.42492	2.01511	2.24093	4966	1607	310	1469	191
1	cassubicifolius	LH016	LH016_G_07	LH016_G_07_RT_05	garden	LH16_07_05_1x	RT	2N	1_sexual	15	0.444998	1	1	1	1	1	1	streamside	46.0108	14.1027	514	-1.04147	-0.0291042	0.579759	0.754055	0.628602	0.432473	0.159436	-0.118424	0.705832	0.315225	0.234626	-1.52415	-0.156378	0.646112	0.505185	2.85155	1.91523	2.6415	-1.20778	2.1859	2.42492	2.01511	2.24093	4967	1513	175	1343	241
1	cassubicifolius	LH016	LH016_G_07	LH016_G_07_SL_01	garden	LH16_07_09052018_1	SL	2N	1_sexual	15	0.444998	1	1	1	1	1	1	streamside	46.0108	14.1027	514	-1.04147	-0.0291042	0.579759	0.754055	0.628602	0.432473	0.159436	-0.118424	0.705832	0.315225	0.234626	-1.52415	-0.156378	0.646112	0.505185	2.85155	1.91523	2.6415	-1.20778	2.1859	2.42492	2.01511	2.24093	8803	207	194	189	190
1	cassubicifolius	LH016	LH016_G_08	LH016_G_08_BL_01	garden	LH16_08_04052018_1	BL	2N	1_sexual	15	0.444998	1	1	1	1	1	1	streamside	46.0108	14.1027	514	-1.04147	-0.0291042	0.579759	0.754055	0.628602	0.432473	0.159436	-0.118424	0.705832	0.315225	0.234626	-1.52415	-0.156378	0.646112	0.505185	2.85155	1.91523	2.6415	-1.20778	2.1859	2.42492	2.01511	2.24093	532	426	312	361	332
1	cassubicifolius	LH016	LH016_G_08	LH016_G_08_BL_01	garden	LH016_08_R_cassubicifolius_BL_1	BL	2N	1_sexual	15	0.444998	1	1	1	1	1	1	streamside	46.0108	14.1027	514	-1.04147	-0.0291042	0.579759	0.754055	0.628602	0.432473	0.159436	-0.118424	0.705832	0.315225	0.234626	-1.52415	-0.156378	0.646112	0.505185	2.85155	1.91523	2.6415	-1.20778	2.1859	2.42492	2.01511	2.24093	533	639	490	570	484
1	cassubicifolius	LH016	LH016_G_08	LH016_G_08_BL_02	garden	LH016_08_R_cassubicifolius_BL_2	BL	2N	1_sexual	15	0.444998	1	1	1	1	1	1	streamside	46.0108	14.1027	514	-1.04147	-0.0291042	0.579759	0.754055	0.628602	0.432473	0.159436	-0.118424	0.705832	0.315225	0.234626	-1.52415	-0.156378	0.646112	0.505185	2.85155	1.91523	2.6415	-1.20778	2.1859	2.42492	2.01511	2.24093	534	784	580	712	601
1	cassubicifolius	LH016	LH016_G_08	LH016_G_08_BL_03	garden	LH016_08_R_cassubicifolius_BL_3	BL	2N	1_sexual	15	0.444998	1	1	1	1	1	1	streamside	46.0108	14.1027	514	-1.04147	-0.0291042	0.579759	0.754055	0.628602	0.432473	0.159436	-0.118424	0.705832	0.315225	0.234626	-1.52415	-0.156378	0.646112	0.505185	2.85155	1.91523	2.6415	-1.20778	2.1859	2.42492	2.01511	2.24093	535	758	596	700	587
1	cassubicifolius	LH016	LH016_G_08	LH016_G_08_SL_01	garden	LH016_08_R_cassubicifolius_SL_1	SL	2N	1_sexual	15	0.444998	1	1	1	1	1	1	streamside	46.0108	14.1027	514	-1.04147	-0.0291042	0.579759	0.754055	0.628602	0.432473	0.159436	-0.118424	0.705832	0.315225	0.234626	-1.52415	-0.156378	0.646112	0.505185	2.85155	1.91523	2.6415	-1.20778	2.1859	2.42492	2.01511	2.24093	8804	176	56	168	50
1	cassubicifolius	LH016	LH016_G_08	LH016_G_08_SL_02	garden	LH016_08_R_cassubicifolius_SL_2	SL	2N	1_sexual	15	0.444998	1	1	1	1	1	1	streamside	46.0108	14.1027	514	-1.04147	-0.0291042	0.579759	0.754055	0.628602	0.432473	0.159436	-0.118424	0.705832	0.315225	0.234626	-1.52415	-0.156378	0.646112	0.505185	2.85155	1.91523	2.6415	-1.20778	2.1859	2.42492	2.01511	2.24093	8805	122	84	105	78
1	cassubicifolius	LH016	LH016_G_08	LH016_G_08_SL_03	garden	LH016_08_R_cassubicifolius_SL_3	SL	2N	1_sexual	15	0.444998	1	1	1	1	1	1	streamside	46.0108	14.1027	514	-1.04147	-0.0291042	0.579759	0.754055	0.628602	0.432473	0.159436	-0.118424	0.705832	0.315225	0.234626	-1.52415	-0.156378	0.646112	0.505185	2.85155	1.91523	2.6415	-1.20778	2.1859	2.42492	2.01511	2.24093	8806	92	61	81	83
1	cassubicifolius	LH016	LH016_G_08	LH016_G_08_SL_04	garden	LH016_08_R_cassubicifolius_SL_4	SL	2N	1_sexual	15	0.444998	1	1	1	1	1	1	streamside	46.0108	14.1027	514	-1.04147	-0.0291042	0.579759	0.754055	0.628602	0.432473	0.159436	-0.118424	0.705832	0.315225	0.234626	-1.52415	-0.156378	0.646112	0.505185	2.85155	1.91523	2.6415	-1.20778	2.1859	2.42492	2.01511	2.24093	8807	169	53	160	49
1	cassubicifolius	LH016	LH016_G_09	LH016_G_09_BL_01	garden	LH16_09_04052018_1	BL	2N	1_sexual	15	0.444998	1	1	1	1	1	1	streamside	46.0108	14.1027	514	-1.04147	-0.0291042	0.579759	0.754055	0.628602	0.432473	0.159436	-0.118424	0.705832	0.315225	0.234626	-1.52415	-0.156378	0.646112	0.505185	2.85155	1.91523	2.6415	-1.20778	2.1859	2.42492	2.01511	2.24093	536	783	529	674	585
1	cassubicifolius	LH016	LH016_G_09	LH016_G_09_BL_02	garden	LH016_09_R_cassubicifolius_BL_2	BL	2N	1_sexual	15	0.444998	1	1	1	1	1	1	streamside	46.0108	14.1027	514	-1.04147	-0.0291042	0.579759	0.754055	0.628602	0.432473	0.159436	-0.118424	0.705832	0.315225	0.234626	-1.52415	-0.156378	0.646112	0.505185	2.85155	1.91523	2.6415	-1.20778	2.1859	2.42492	2.01511	2.24093	537	763	684	704	651
1	cassubicifolius	LH016	LH016_G_09	LH016_G_09_BL_03	garden	LH016_09_R_cassubicifolius_BL_3	BL	2N	1_sexual	15	0.444998	1	1	1	1	1	1	streamside	46.0108	14.1027	514	-1.04147	-0.0291042	0.579759	0.754055	0.628602	0.432473	0.159436	-0.118424	0.705832	0.315225	0.234626	-1.52415	-0.156378	0.646112	0.505185	2.85155	1.91523	2.6415	-1.20778	2.1859	2.42492	2.01511	2.24093	538	858	602	762	607
1	cassubicifolius	LH016	LH016_G_09	LH016_G_09_SL_01	garden	LH016_09_R_cassubicifolius_SL_1	SL	2N	1_sexual	15	0.444998	1	1	1	1	1	1	streamside	46.0108	14.1027	514	-1.04147	-0.0291042	0.579759	0.754055	0.628602	0.432473	0.159436	-0.118424	0.705832	0.315225	0.234626	-1.52415	-0.156378	0.646112	0.505185	2.85155	1.91523	2.6415	-1.20778	2.1859	2.42492	2.01511	2.24093	8808	192	95	173	109
1	cassubicifolius	LH016	LH016_G_09	LH016_G_09_SL_02	garden	LH016_09_R_cassubicifolius_SL_2	SL	2N	1_sexual	15	0.444998	1	1	1	1	1	1	streamside	46.0108	14.1027	514	-1.04147	-0.0291042	0.579759	0.754055	0.628602	0.432473	0.159436	-0.118424	0.705832	0.315225	0.234626	-1.52415	-0.156378	0.646112	0.505185	2.85155	1.91523	2.6415	-1.20778	2.1859	2.42492	2.01511	2.24093	8809	239	70	225	71
1	cassubicifolius	LH016	LH016_G_10	LH016_G_10_BL_01	garden	LH16_10_04052018_1	BL	2N	1_sexual	15	0.444998	1	1	1	1	1	1	streamside	46.0108	14.1027	514	-1.04147	-0.0291042	0.579759	0.754055	0.628602	0.432473	0.159436	-0.118424	0.705832	0.315225	0.234626	-1.52415	-0.156378	0.646112	0.505185	2.85155	1.91523	2.6415	-1.20778	2.1859	2.42492	2.01511	2.24093	539	692	489	592	510
1	cassubicifolius	LH016	LH016_G_10	LH016_G_10_BL_01	garden	LH016_10_R_cassubicifolius_BL_1	BL	2N	1_sexual	15	0.444998	1	1	1	1	1	1	streamside	46.0108	14.1027	514	-1.04147	-0.0291042	0.579759	0.754055	0.628602	0.432473	0.159436	-0.118424	0.705832	0.315225	0.234626	-1.52415	-0.156378	0.646112	0.505185	2.85155	1.91523	2.6415	-1.20778	2.1859	2.42492	2.01511	2.24093	540	715	548	657	550
1	cassubicifolius	LH016	LH016_G_10	LH016_G_10_BL_02	garden	LH016_10_R_cassubicifolius_BL_2	BL	2N	1_sexual	15	0.444998	1	1	1	1	1	1	streamside	46.0108	14.1027	514	-1.04147	-0.0291042	0.579759	0.754055	0.628602	0.432473	0.159436	-0.118424	0.705832	0.315225	0.234626	-1.52415	-0.156378	0.646112	0.505185	2.85155	1.91523	2.6415	-1.20778	2.1859	2.42492	2.01511	2.24093	541	522	403	472	399
1	cassubicifolius	LH016	LH016_G_10	LH016_G_10_BL_03	garden	LH016_10_R_cassubicifolius_BL_3	BL	2N	1_sexual	15	0.444998	1	1	1	1	1	1	streamside	46.0108	14.1027	514	-1.04147	-0.0291042	0.579759	0.754055	0.628602	0.432473	0.159436	-0.118424	0.705832	0.315225	0.234626	-1.52415	-0.156378	0.646112	0.505185	2.85155	1.91523	2.6415	-1.20778	2.1859	2.42492	2.01511	2.24093	542	767	547	682	564
1	cassubicifolius	LH016	LH016_G_10	LH016_G_10_SL_01	garden	LH016_10_R_cassubicifolius_SL_1	SL	2N	1_sexual	15	0.444998	1	1	1	1	1	1	streamside	46.0108	14.1027	514	-1.04147	-0.0291042	0.579759	0.754055	0.628602	0.432473	0.159436	-0.118424	0.705832	0.315225	0.234626	-1.52415	-0.156378	0.646112	0.505185	2.85155	1.91523	2.6415	-1.20778	2.1859	2.42492	2.01511	2.24093	8810	271	41	257	47
1	cassubicifolius	LH016	LH016_G_10	LH016_G_10_SL_02	garden	LH016_10_R_cassubicifolius_SL_2	SL	2N	1_sexual	15	0.444998	1	1	1	1	1	1	streamside	46.0108	14.1027	514	-1.04147	-0.0291042	0.579759	0.754055	0.628602	0.432473	0.159436	-0.118424	0.705832	0.315225	0.234626	-1.52415	-0.156378	0.646112	0.505185	2.85155	1.91523	2.6415	-1.20778	2.1859	2.42492	2.01511	2.24093	8811	199	52	187	62
1	cassubicifolius	LH016	LH016_G_11	LH016_G_11_BL_01	garden	LH16_11_04052018_1	BL	2N	1_sexual	15	0.444998	1	1	1	1	1	1	streamside	46.0108	14.1027	514	-1.04147	-0.0291042	0.579759	0.754055	0.628602	0.432473	0.159436	-0.118424	0.705832	0.315225	0.234626	-1.52415	-0.156378	0.646112	0.505185	2.85155	1.91523	2.6415	-1.20778	2.1859	2.42492	2.01511	2.24093	543	635	414	599	438
1	cassubicifolius	LH016	LH016_G_11	LH016_G_11_BL_01	garden	LH016_11_R_cassubicifolius_BL_1	BL	2N	1_sexual	15	0.444998	1	1	1	1	1	1	streamside	46.0108	14.1027	514	-1.04147	-0.0291042	0.579759	0.754055	0.628602	0.432473	0.159436	-0.118424	0.705832	0.315225	0.234626	-1.52415	-0.156378	0.646112	0.505185	2.85155	1.91523	2.6415	-1.20778	2.1859	2.42492	2.01511	2.24093	544	570	315	500	326
1	cassubicifolius	LH016	LH016_G_11	LH016_G_11_BL_02	garden	LH016_11_R_cassubicifolius_BL_2	BL	2N	1_sexual	15	0.444998	1	1	1	1	1	1	streamside	46.0108	14.1027	514	-1.04147	-0.0291042	0.579759	0.754055	0.628602	0.432473	0.159436	-0.118424	0.705832	0.315225	0.234626	-1.52415	-0.156378	0.646112	0.505185	2.85155	1.91523	2.6415	-1.20778	2.1859	2.42492	2.01511	2.24093	545	713	503	665	519
1	cassubicifolius	LH016	LH016_G_11	LH016_G_11_SL_01	garden	LH016_11_R_cassubicifolius_SL_1	SL	2N	1_sexual	15	0.444998	1	1	1	1	1	1	streamside	46.0108	14.1027	514	-1.04147	-0.0291042	0.579759	0.754055	0.628602	0.432473	0.159436	-0.118424	0.705832	0.315225	0.234626	-1.52415	-0.156378	0.646112	0.505185	2.85155	1.91523	2.6415	-1.20778	2.1859	2.42492	2.01511	2.24093	8812	160	86	147	93
1	cassubicifolius	LH016	LH016_G_12	LH016_G_12_BL_01	garden	LH16_12_04052018_1	BL	2N	1_sexual	15	0.444998	1	1	1	1	1	1	streamside	46.0108	14.1027	514	-1.04147	-0.0291042	0.579759	0.754055	0.628602	0.432473	0.159436	-0.118424	0.705832	0.315225	0.234626	-1.52415	-0.156378	0.646112	0.505185	2.85155	1.91523	2.6415	-1.20778	2.1859	2.42492	2.01511	2.24093	546	624	357	565	375
1	cassubicifolius	LH016	LH016_G_12	LH016_G_12_BL_01	garden	LH016_12_R_cassubicifolius_BL_1	BL	2N	1_sexual	15	0.444998	1	1	1	1	1	1	streamside	46.0108	14.1027	514	-1.04147	-0.0291042	0.579759	0.754055	0.628602	0.432473	0.159436	-0.118424	0.705832	0.315225	0.234626	-1.52415	-0.156378	0.646112	0.505185	2.85155	1.91523	2.6415	-1.20778	2.1859	2.42492	2.01511	2.24093	547	1017	692	918	684
1	cassubicifolius	LH016	LH016_G_12	LH016_G_12_BL_02	garden	LH016_12_R_cassubicifolius_BL_2	BL	2N	1_sexual	15	0.444998	1	1	1	1	1	1	streamside	46.0108	14.1027	514	-1.04147	-0.0291042	0.579759	0.754055	0.628602	0.432473	0.159436	-0.118424	0.705832	0.315225	0.234626	-1.52415	-0.156378	0.646112	0.505185	2.85155	1.91523	2.6415	-1.20778	2.1859	2.42492	2.01511	2.24093	548	972	671	867	640
1	cassubicifolius	LH016	LH016_G_12	LH016_G_12_SL_01	garden	LH016_12_R_cassubicifolius_SL_1	SL	2N	1_sexual	15	0.444998	1	1	1	1	1	1	streamside	46.0108	14.1027	514	-1.04147	-0.0291042	0.579759	0.754055	0.628602	0.432473	0.159436	-0.118424	0.705832	0.315225	0.234626	-1.52415	-0.156378	0.646112	0.505185	2.85155	1.91523	2.6415	-1.20778	2.1859	2.42492	2.01511	2.24093	8813	251	91	238	103
1	cassubicifolius	LH016	LH016_G_13	LH016_G_13_BL_01	garden	LH16_13_25042018_1	BL	2N	1_sexual	15	0.444998	1	1	1	1	1	1	streamside	46.0108	14.1027	514	-1.04147	-0.0291042	0.579759	0.754055	0.628602	0.432473	0.159436	-0.118424	0.705832	0.315225	0.234626	-1.52415	-0.156378	0.646112	0.505185	2.85155	1.91523	2.6415	-1.20778	2.1859	2.42492	2.01511	2.24093	549	421	242	381	252
1	cassubicifolius	LH016	LH016_G_13	LH016_G_13_RT_01	garden	LH16_13_01	RT	2N	1_sexual	15	0.444998	1	1	1	1	1	1	streamside	46.0108	14.1027	514	-1.04147	-0.0291042	0.579759	0.754055	0.628602	0.432473	0.159436	-0.118424	0.705832	0.315225	0.234626	-1.52415	-0.156378	0.646112	0.505185	2.85155	1.91523	2.6415	-1.20778	2.1859	2.42492	2.01511	2.24093	4968	1515	384	1384	354
1	cassubicifolius	LH016	LH016_G_13	LH016_G_13_RT_02	garden	LH16_13_02	RT	2N	1_sexual	15	0.444998	1	1	1	1	1	1	streamside	46.0108	14.1027	514	-1.04147	-0.0291042	0.579759	0.754055	0.628602	0.432473	0.159436	-0.118424	0.705832	0.315225	0.234626	-1.52415	-0.156378	0.646112	0.505185	2.85155	1.91523	2.6415	-1.20778	2.1859	2.42492	2.01511	2.24093	4969	1726	441	1632	398
1	cassubicifolius	LH016	LH016_G_13	LH016_G_13_RT_03	garden	LH16_13_03	RT	2N	1_sexual	15	0.444998	1	1	1	1	1	1	streamside	46.0108	14.1027	514	-1.04147	-0.0291042	0.579759	0.754055	0.628602	0.432473	0.159436	-0.118424	0.705832	0.315225	0.234626	-1.52415	-0.156378	0.646112	0.505185	2.85155	1.91523	2.6415	-1.20778	2.1859	2.42492	2.01511	2.24093	4970	1516	520	1415	506
1	cassubicifolius	LH016	LH016_G_13	LH016_G_13_RT_04	garden	LH16_13_04	RT	2N	1_sexual	15	0.444998	1	1	1	1	1	1	streamside	46.0108	14.1027	514	-1.04147	-0.0291042	0.579759	0.754055	0.628602	0.432473	0.159436	-0.118424	0.705832	0.315225	0.234626	-1.52415	-0.156378	0.646112	0.505185	2.85155	1.91523	2.6415	-1.20778	2.1859	2.42492	2.01511	2.24093	4971	1584	265	1407	203
1	cassubicifolius	LH016	LH016_G_13	LH016_G_13_RT_05	garden	LH16_13_05	RT	2N	1_sexual	15	0.444998	1	1	1	1	1	1	streamside	46.0108	14.1027	514	-1.04147	-0.0291042	0.579759	0.754055	0.628602	0.432473	0.159436	-0.118424	0.705832	0.315225	0.234626	-1.52415	-0.156378	0.646112	0.505185	2.85155	1.91523	2.6415	-1.20778	2.1859	2.42492	2.01511	2.24093	4972	1516	613	1392	584
1	cassubicifolius	LH016	LH016_G_13	LH016_G_13_RT_06	garden	LH16_13_06	RT	2N	1_sexual	15	0.444998	1	1	1	1	1	1	streamside	46.0108	14.1027	514	-1.04147	-0.0291042	0.579759	0.754055	0.628602	0.432473	0.159436	-0.118424	0.705832	0.315225	0.234626	-1.52415	-0.156378	0.646112	0.505185	2.85155	1.91523	2.6415	-1.20778	2.1859	2.42492	2.01511	2.24093	4973	1648	267	1509	209
1	cassubicifolius	LH016	LH016_G_13	LH016_G_13_SL_01	garden	LH16_13_25042018_1	SL	2N	1_sexual	15	0.444998	1	1	1	1	1	1	streamside	46.0108	14.1027	514	-1.04147	-0.0291042	0.579759	0.754055	0.628602	0.432473	0.159436	-0.118424	0.705832	0.315225	0.234626	-1.52415	-0.156378	0.646112	0.505185	2.85155	1.91523	2.6415	-1.20778	2.1859	2.42492	2.01511	2.24093	8814	158	78	149	77
1	cassubicifolius	LH016	LH016_G_13	LH016_G_13_SL_02	garden	LH16_13_25042018_2	SL	2N	1_sexual	15	0.444998	1	1	1	1	1	1	streamside	46.0108	14.1027	514	-1.04147	-0.0291042	0.579759	0.754055	0.628602	0.432473	0.159436	-0.118424	0.705832	0.315225	0.234626	-1.52415	-0.156378	0.646112	0.505185	2.85155	1.91523	2.6415	-1.20778	2.1859	2.42492	2.01511	2.24093	8815	164	69	150	71
1	cassubicifolius	LH016	LH016_G_14	LH016_G_14_RT_01	garden	LH16_14_01	RT	2N	1_sexual	15	0.444998	1	1	1	1	1	1	streamside	46.0108	14.1027	514	-1.04147	-0.0291042	0.579759	0.754055	0.628602	0.432473	0.159436	-0.118424	0.705832	0.315225	0.234626	-1.52415	-0.156378	0.646112	0.505185	2.85155	1.91523	2.6415	-1.20778	2.1859	2.42492	2.01511	2.24093	4974	1509	536	1378	535
1	cassubicifolius	LH016	LH016_G_14	LH016_G_14_RT_02	garden	LH16_14_02	RT	2N	1_sexual	15	0.444998	1	1	1	1	1	1	streamside	46.0108	14.1027	514	-1.04147	-0.0291042	0.579759	0.754055	0.628602	0.432473	0.159436	-0.118424	0.705832	0.315225	0.234626	-1.52415	-0.156378	0.646112	0.505185	2.85155	1.91523	2.6415	-1.20778	2.1859	2.42492	2.01511	2.24093	4975	1706	443	1550	411
1	cassubicifolius	LH016	LH016_G_14	LH016_G_14_RT_03	garden	LH16_14_03	RT	2N	1_sexual	15	0.444998	1	1	1	1	1	1	streamside	46.0108	14.1027	514	-1.04147	-0.0291042	0.579759	0.754055	0.628602	0.432473	0.159436	-0.118424	0.705832	0.315225	0.234626	-1.52415	-0.156378	0.646112	0.505185	2.85155	1.91523	2.6415	-1.20778	2.1859	2.42492	2.01511	2.24093	4976	1545	288	1382	257
1	cassubicifolius	LH016	LH016_G_14	LH016_G_14_SL_01	garden	LH16_14_04052018_1	SL	2N	1_sexual	15	0.444998	1	1	1	1	1	1	streamside	46.0108	14.1027	514	-1.04147	-0.0291042	0.579759	0.754055	0.628602	0.432473	0.159436	-0.118424	0.705832	0.315225	0.234626	-1.52415	-0.156378	0.646112	0.505185	2.85155	1.91523	2.6415	-1.20778	2.1859	2.42492	2.01511	2.24093	8816	245	103	235	111
1	cassubicifolius	LH016	LH016_G_16	LH016_G_16_BL_01	garden	LH16_16_04052018_1	BL	2N	1_sexual	15	0.444998	1	1	1	1	1	1	streamside	46.0108	14.1027	514	-1.04147	-0.0291042	0.579759	0.754055	0.628602	0.432473	0.159436	-0.118424	0.705832	0.315225	0.234626	-1.52415	-0.156378	0.646112	0.505185	2.85155	1.91523	2.6415	-1.20778	2.1859	2.42492	2.01511	2.24093	550	581	343	516	380
1	cassubicifolius	LH016	LH016_G_16	LH016_G_16_SL_01	garden	LH16_16_04052018_1	SL	2N	1_sexual	15	0.444998	1	1	1	1	1	1	streamside	46.0108	14.1027	514	-1.04147	-0.0291042	0.579759	0.754055	0.628602	0.432473	0.159436	-0.118424	0.705832	0.315225	0.234626	-1.52415	-0.156378	0.646112	0.505185	2.85155	1.91523	2.6415	-1.20778	2.1859	2.42492	2.01511	2.24093	8817	246	116	231	119
1	cassubicifolius	LH016	LH016_G_16	LH016_G_16_SL_02	garden	LH16_16_04052018_2	SL	2N	1_sexual	15	0.444998	1	1	1	1	1	1	streamside	46.0108	14.1027	514	-1.04147	-0.0291042	0.579759	0.754055	0.628602	0.432473	0.159436	-0.118424	0.705832	0.315225	0.234626	-1.52415	-0.156378	0.646112	0.505185	2.85155	1.91523	2.6415	-1.20778	2.1859	2.42492	2.01511	2.24093	8818	216	112	197	109
1	cassubicifolius	LH040	LH040_G_03	LH040_G_03_BL_01	garden	LH040_03_R_carpaticola_BL_1	BL	2N	1_sexual	10	0.587528	1	1	1	1	1	1	humid_forest	48.6773	20.1067	387	-0.542224	0.952431	0.238913	0.245636	0.0860669	2.00567	0.662815	1.12145	0.801725	-1.06851	1.88277	0.324414	-0.670805	0.411077	-0.581685	-0.487027	0.0975132	-0.84058	1.83679	-0.0766506	-0.904504	0.0977886	-1.1513	557	545	394	513	398
1	cassubicifolius	LH040	LH040_G_03	LH040_G_03_BL_02	garden	LH040_03_R_carpaticola_BL_2	BL	2N	1_sexual	10	0.587528	1	1	1	1	1	1	humid_forest	48.6773	20.1067	387	-0.542224	0.952431	0.238913	0.245636	0.0860669	2.00567	0.662815	1.12145	0.801725	-1.06851	1.88277	0.324414	-0.670805	0.411077	-0.581685	-0.487027	0.0975132	-0.84058	1.83679	-0.0766506	-0.904504	0.0977886	-1.1513	558	668	552	625	523
1	cassubicifolius	LH040	LH040_G_03	LH040_G_03_BL_03	garden	LH040_03_R_carpaticola_BL_3	BL	2N	1_sexual	10	0.587528	1	1	1	1	1	1	humid_forest	48.6773	20.1067	387	-0.542224	0.952431	0.238913	0.245636	0.0860669	2.00567	0.662815	1.12145	0.801725	-1.06851	1.88277	0.324414	-0.670805	0.411077	-0.581685	-0.487027	0.0975132	-0.84058	1.83679	-0.0766506	-0.904504	0.0977886	-1.1513	559	566	430	534	447
1	cassubicifolius	LH040	LH040_G_03	LH040_G_03_RT_01	garden	LH40_03_01	RT	2N	1_sexual	10	0.587528	1	1	1	1	1	1	humid_forest	48.6773	20.1067	387	-0.542224	0.952431	0.238913	0.245636	0.0860669	2.00567	0.662815	1.12145	0.801725	-1.06851	1.88277	0.324414	-0.670805	0.411077	-0.581685	-0.487027	0.0975132	-0.84058	1.83679	-0.0766506	-0.904504	0.0977886	-1.1513	4986	1511	699	1350	678
1	cassubicifolius	LH040	LH040_G_03	LH040_G_03_RT_02	garden	LH40_03_02	RT	2N	1_sexual	10	0.587528	1	1	1	1	1	1	humid_forest	48.6773	20.1067	387	-0.542224	0.952431	0.238913	0.245636	0.0860669	2.00567	0.662815	1.12145	0.801725	-1.06851	1.88277	0.324414	-0.670805	0.411077	-0.581685	-0.487027	0.0975132	-0.84058	1.83679	-0.0766506	-0.904504	0.0977886	-1.1513	4987	1395	481	1312	441
1	cassubicifolius	LH040	LH040_G_03	LH040_G_03_RT_03	garden	LH40_03_03	RT	2N	1_sexual	10	0.587528	1	1	1	1	1	1	humid_forest	48.6773	20.1067	387	-0.542224	0.952431	0.238913	0.245636	0.0860669	2.00567	0.662815	1.12145	0.801725	-1.06851	1.88277	0.324414	-0.670805	0.411077	-0.581685	-0.487027	0.0975132	-0.84058	1.83679	-0.0766506	-0.904504	0.0977886	-1.1513	4988	1473	872	1335	844
1	cassubicifolius	LH040	LH040_G_04	LH040_G_04_BL_01	garden	LH040_04_R_carpaticola_BL_1	BL	2N	1_sexual	10	0.587528	1	1	1	1	1	1	humid_forest	48.6773	20.1067	387	-0.542224	0.952431	0.238913	0.245636	0.0860669	2.00567	0.662815	1.12145	0.801725	-1.06851	1.88277	0.324414	-0.670805	0.411077	-0.581685	-0.487027	0.0975132	-0.84058	1.83679	-0.0766506	-0.904504	0.0977886	-1.1513	560	639	369	587	373
1	cassubicifolius	LH040	LH040_G_04	LH040_G_04_BL_02	garden	LH040_04_R_carpaticola_BL_2	BL	2N	1_sexual	10	0.587528	1	1	1	1	1	1	humid_forest	48.6773	20.1067	387	-0.542224	0.952431	0.238913	0.245636	0.0860669	2.00567	0.662815	1.12145	0.801725	-1.06851	1.88277	0.324414	-0.670805	0.411077	-0.581685	-0.487027	0.0975132	-0.84058	1.83679	-0.0766506	-0.904504	0.0977886	-1.1513	561	626	387	572	372
1	cassubicifolius	LH040	LH040_G_04	LH040_G_04_BL_04	garden	LH040_04_R_carpaticola_BL_4	BL	2N	1_sexual	10	0.587528	1	1	1	1	1	1	humid_forest	48.6773	20.1067	387	-0.542224	0.952431	0.238913	0.245636	0.0860669	2.00567	0.662815	1.12145	0.801725	-1.06851	1.88277	0.324414	-0.670805	0.411077	-0.581685	-0.487027	0.0975132	-0.84058	1.83679	-0.0766506	-0.904504	0.0977886	-1.1513	562	542	278	506	278
1	cassubicifolius	LH040	LH040_G_04	LH040_G_04_RT_01	garden	LH40_04_01	RT	2N	1_sexual	10	0.587528	1	1	1	1	1	1	humid_forest	48.6773	20.1067	387	-0.542224	0.952431	0.238913	0.245636	0.0860669	2.00567	0.662815	1.12145	0.801725	-1.06851	1.88277	0.324414	-0.670805	0.411077	-0.581685	-0.487027	0.0975132	-0.84058	1.83679	-0.0766506	-0.904504	0.0977886	-1.1513	4989	1575	438	1499	432
1	cassubicifolius	LH040	LH040_G_04	LH040_G_04_RT_02	garden	LH40_04_02	RT	2N	1_sexual	10	0.587528	1	1	1	1	1	1	humid_forest	48.6773	20.1067	387	-0.542224	0.952431	0.238913	0.245636	0.0860669	2.00567	0.662815	1.12145	0.801725	-1.06851	1.88277	0.324414	-0.670805	0.411077	-0.581685	-0.487027	0.0975132	-0.84058	1.83679	-0.0766506	-0.904504	0.0977886	-1.1513	4990	1427	531	1328	576
1	cassubicifolius	LH040	LH040_G_04	LH040_G_04_RT_03	garden	LH40_04_03	RT	2N	1_sexual	10	0.587528	1	1	1	1	1	1	humid_forest	48.6773	20.1067	387	-0.542224	0.952431	0.238913	0.245636	0.0860669	2.00567	0.662815	1.12145	0.801725	-1.06851	1.88277	0.324414	-0.670805	0.411077	-0.581685	-0.487027	0.0975132	-0.84058	1.83679	-0.0766506	-0.904504	0.0977886	-1.1513	4991	1413	765	1315	762
1	cassubicifolius	LH040	LH040_G_05	LH040_G_05_BL_01	garden	LH040_05_R_carpaticola_BL_1	BL	2N	1_sexual	10	0.587528	1	1	1	1	1	1	humid_forest	48.6773	20.1067	387	-0.542224	0.952431	0.238913	0.245636	0.0860669	2.00567	0.662815	1.12145	0.801725	-1.06851	1.88277	0.324414	-0.670805	0.411077	-0.581685	-0.487027	0.0975132	-0.84058	1.83679	-0.0766506	-0.904504	0.0977886	-1.1513	563	518	275	484	264
1	cassubicifolius	LH040	LH040_G_05	LH040_G_05_BL_02	garden	LH040_05_R_carpaticola_BL_2	BL	2N	1_sexual	10	0.587528	1	1	1	1	1	1	humid_forest	48.6773	20.1067	387	-0.542224	0.952431	0.238913	0.245636	0.0860669	2.00567	0.662815	1.12145	0.801725	-1.06851	1.88277	0.324414	-0.670805	0.411077	-0.581685	-0.487027	0.0975132	-0.84058	1.83679	-0.0766506	-0.904504	0.0977886	-1.1513	564	444	278	407	276
1	cassubicifolius	LH040	LH040_G_05	LH040_G_05_BL_04	garden	LH040_05_R_carpaticola_BL_4	BL	2N	1_sexual	10	0.587528	1	1	1	1	1	1	humid_forest	48.6773	20.1067	387	-0.542224	0.952431	0.238913	0.245636	0.0860669	2.00567	0.662815	1.12145	0.801725	-1.06851	1.88277	0.324414	-0.670805	0.411077	-0.581685	-0.487027	0.0975132	-0.84058	1.83679	-0.0766506	-0.904504	0.0977886	-1.1513	565	425	229	405	213
1	cassubicifolius	LH040	LH040_G_05	LH040_G_05_RT_01	garden	LH40_05_01	RT	2N	1_sexual	10	0.587528	1	1	1	1	1	1	humid_forest	48.6773	20.1067	387	-0.542224	0.952431	0.238913	0.245636	0.0860669	2.00567	0.662815	1.12145	0.801725	-1.06851	1.88277	0.324414	-0.670805	0.411077	-0.581685	-0.487027	0.0975132	-0.84058	1.83679	-0.0766506	-0.904504	0.0977886	-1.1513	4992	1618	409	1518	397
1	cassubicifolius	LH040	LH040_G_05	LH040_G_05_RT_02	garden	LH40_05_02	RT	2N	1_sexual	10	0.587528	1	1	1	1	1	1	humid_forest	48.6773	20.1067	387	-0.542224	0.952431	0.238913	0.245636	0.0860669	2.00567	0.662815	1.12145	0.801725	-1.06851	1.88277	0.324414	-0.670805	0.411077	-0.581685	-0.487027	0.0975132	-0.84058	1.83679	-0.0766506	-0.904504	0.0977886	-1.1513	4993	1707	478	1647	471
1	cassubicifolius	LH040	LH040_G_05	LH040_G_05_SL_01	garden	LH040_05_R_carpaticola_SL_1	SL	2N	1_sexual	10	0.587528	1	1	1	1	1	1	humid_forest	48.6773	20.1067	387	-0.542224	0.952431	0.238913	0.245636	0.0860669	2.00567	0.662815	1.12145	0.801725	-1.06851	1.88277	0.324414	-0.670805	0.411077	-0.581685	-0.487027	0.0975132	-0.84058	1.83679	-0.0766506	-0.904504	0.0977886	-1.1513	8827	237	18	223	29
1	cassubicifolius	LH040	LH040_G_05	LH040_G_05_SL_02	garden	LH040_05_R_carpaticola_SL_2	SL	2N	1_sexual	10	0.587528	1	1	1	1	1	1	humid_forest	48.6773	20.1067	387	-0.542224	0.952431	0.238913	0.245636	0.0860669	2.00567	0.662815	1.12145	0.801725	-1.06851	1.88277	0.324414	-0.670805	0.411077	-0.581685	-0.487027	0.0975132	-0.84058	1.83679	-0.0766506	-0.904504	0.0977886	-1.1513	8828	240	89	233	93
1	cassubicifolius	LH040	LH040_G_05	LH040_G_05_SL_03	garden	LH040_05_R_carpaticola_SL_3	SL	2N	1_sexual	10	0.587528	1	1	1	1	1	1	humid_forest	48.6773	20.1067	387	-0.542224	0.952431	0.238913	0.245636	0.0860669	2.00567	0.662815	1.12145	0.801725	-1.06851	1.88277	0.324414	-0.670805	0.411077	-0.581685	-0.487027	0.0975132	-0.84058	1.83679	-0.0766506	-0.904504	0.0977886	-1.1513	8829	185	81	177	86
1	cassubicifolius	LH040	LH040_G_05	LH040_G_05_SL_04	garden	LH040_05_R_carpaticola_SL_4	SL	2N	1_sexual	10	0.587528	1	1	1	1	1	1	humid_forest	48.6773	20.1067	387	-0.542224	0.952431	0.238913	0.245636	0.0860669	2.00567	0.662815	1.12145	0.801725	-1.06851	1.88277	0.324414	-0.670805	0.411077	-0.581685	-0.487027	0.0975132	-0.84058	1.83679	-0.0766506	-0.904504	0.0977886	-1.1513	8830	190	77	184	78
1	cassubicifolius	LH040	LH040_G_06	LH040_G_06_BL_01	garden	LH040_06_R_carpaticola_BL_1	BL	2N	1_sexual	10	0.587528	1	1	1	1	1	1	humid_forest	48.6773	20.1067	387	-0.542224	0.952431	0.238913	0.245636	0.0860669	2.00567	0.662815	1.12145	0.801725	-1.06851	1.88277	0.324414	-0.670805	0.411077	-0.581685	-0.487027	0.0975132	-0.84058	1.83679	-0.0766506	-0.904504	0.0977886	-1.1513	566	424	243	390	259
1	cassubicifolius	LH040	LH040_G_06	LH040_G_06_BL_02	garden	LH040_06_R_carpaticola_BL_2	BL	2N	1_sexual	10	0.587528	1	1	1	1	1	1	humid_forest	48.6773	20.1067	387	-0.542224	0.952431	0.238913	0.245636	0.0860669	2.00567	0.662815	1.12145	0.801725	-1.06851	1.88277	0.324414	-0.670805	0.411077	-0.581685	-0.487027	0.0975132	-0.84058	1.83679	-0.0766506	-0.904504	0.0977886	-1.1513	567	399	240	373	249
1	cassubicifolius	LH040	LH040_G_06	LH040_G_06_BL_03	garden	LH040_06_R_carpaticola_BL_3	BL	2N	1_sexual	10	0.587528	1	1	1	1	1	1	humid_forest	48.6773	20.1067	387	-0.542224	0.952431	0.238913	0.245636	0.0860669	2.00567	0.662815	1.12145	0.801725	-1.06851	1.88277	0.324414	-0.670805	0.411077	-0.581685	-0.487027	0.0975132	-0.84058	1.83679	-0.0766506	-0.904504	0.0977886	-1.1513	568	328	224	314	222
1	cassubicifolius	LH040	LH040_G_06	LH040_G_06_BL_04	garden	LH040_06_R_carpaticola_BL_4	BL	2N	1_sexual	10	0.587528	1	1	1	1	1	1	humid_forest	48.6773	20.1067	387	-0.542224	0.952431	0.238913	0.245636	0.0860669	2.00567	0.662815	1.12145	0.801725	-1.06851	1.88277	0.324414	-0.670805	0.411077	-0.581685	-0.487027	0.0975132	-0.84058	1.83679	-0.0766506	-0.904504	0.0977886	-1.1513	569	342	247	340	231
1	cassubicifolius	LH040	LH040_G_06	LH040_G_06_RT_01	garden	LH40_06_01	RT	2N	1_sexual	10	0.587528	1	1	1	1	1	1	humid_forest	48.6773	20.1067	387	-0.542224	0.952431	0.238913	0.245636	0.0860669	2.00567	0.662815	1.12145	0.801725	-1.06851	1.88277	0.324414	-0.670805	0.411077	-0.581685	-0.487027	0.0975132	-0.84058	1.83679	-0.0766506	-0.904504	0.0977886	-1.1513	4994	1526	225	1389	213
1	cassubicifolius	LH040	LH040_G_07	LH040_G_07_BL_01	garden	LH040_07_R_carpaticola_BL_1	BL	2N	1_sexual	10	0.587528	1	1	1	1	1	1	humid_forest	48.6773	20.1067	387	-0.542224	0.952431	0.238913	0.245636	0.0860669	2.00567	0.662815	1.12145	0.801725	-1.06851	1.88277	0.324414	-0.670805	0.411077	-0.581685	-0.487027	0.0975132	-0.84058	1.83679	-0.0766506	-0.904504	0.0977886	-1.1513	570	564	327	500	328
1	cassubicifolius	LH040	LH040_G_07	LH040_G_07_BL_03	garden	LH040_07_R_carpaticola_BL_3	BL	2N	1_sexual	10	0.587528	1	1	1	1	1	1	humid_forest	48.6773	20.1067	387	-0.542224	0.952431	0.238913	0.245636	0.0860669	2.00567	0.662815	1.12145	0.801725	-1.06851	1.88277	0.324414	-0.670805	0.411077	-0.581685	-0.487027	0.0975132	-0.84058	1.83679	-0.0766506	-0.904504	0.0977886	-1.1513	571	688	438	632	468
1	cassubicifolius	LH040	LH040_G_07	LH040_G_07_RT_01	garden	LH40_07_01	RT	2N	1_sexual	10	0.587528	1	1	1	1	1	1	humid_forest	48.6773	20.1067	387	-0.542224	0.952431	0.238913	0.245636	0.0860669	2.00567	0.662815	1.12145	0.801725	-1.06851	1.88277	0.324414	-0.670805	0.411077	-0.581685	-0.487027	0.0975132	-0.84058	1.83679	-0.0766506	-0.904504	0.0977886	-1.1513	4995	1600	264	1422	288
1	cassubicifolius	LH040	LH040_G_07	LH040_G_07_RT_02	garden	LH40_07_02	RT	2N	1_sexual	10	0.587528	1	1	1	1	1	1	humid_forest	48.6773	20.1067	387	-0.542224	0.952431	0.238913	0.245636	0.0860669	2.00567	0.662815	1.12145	0.801725	-1.06851	1.88277	0.324414	-0.670805	0.411077	-0.581685	-0.487027	0.0975132	-0.84058	1.83679	-0.0766506	-0.904504	0.0977886	-1.1513	4996	1493	156	1352	106
1	cassubicifolius	LH040	LH040_G_07	LH040_G_07_RT_03	garden	LH40_07_03	RT	2N	1_sexual	10	0.587528	1	1	1	1	1	1	humid_forest	48.6773	20.1067	387	-0.542224	0.952431	0.238913	0.245636	0.0860669	2.00567	0.662815	1.12145	0.801725	-1.06851	1.88277	0.324414	-0.670805	0.411077	-0.581685	-0.487027	0.0975132	-0.84058	1.83679	-0.0766506	-0.904504	0.0977886	-1.1513	4997	1448	299	1304	381
1	cassubicifolius	LH040	LH040_G_07	LH040_G_07_SL_01	garden	LH040_07_R_carpaticola_SL_1	SL	2N	1_sexual	10	0.587528	1	1	1	1	1	1	humid_forest	48.6773	20.1067	387	-0.542224	0.952431	0.238913	0.245636	0.0860669	2.00567	0.662815	1.12145	0.801725	-1.06851	1.88277	0.324414	-0.670805	0.411077	-0.581685	-0.487027	0.0975132	-0.84058	1.83679	-0.0766506	-0.904504	0.0977886	-1.1513	8831	133	80	122	86
1	cassubicifolius	LH040	LH040_G_07	LH040_G_07_SL_02	garden	LH040_07_R_carpaticola_SL_2	SL	2N	1_sexual	10	0.587528	1	1	1	1	1	1	humid_forest	48.6773	20.1067	387	-0.542224	0.952431	0.238913	0.245636	0.0860669	2.00567	0.662815	1.12145	0.801725	-1.06851	1.88277	0.324414	-0.670805	0.411077	-0.581685	-0.487027	0.0975132	-0.84058	1.83679	-0.0766506	-0.904504	0.0977886	-1.1513	8832	192	84	185	68
1	cassubicifolius	LH040	LH040_G_07	LH040_G_07_SL_03	garden	LH040_07_R_carpaticola_SL_3	SL	2N	1_sexual	10	0.587528	1	1	1	1	1	1	humid_forest	48.6773	20.1067	387	-0.542224	0.952431	0.238913	0.245636	0.0860669	2.00567	0.662815	1.12145	0.801725	-1.06851	1.88277	0.324414	-0.670805	0.411077	-0.581685	-0.487027	0.0975132	-0.84058	1.83679	-0.0766506	-0.904504	0.0977886	-1.1513	8833	111	73	95	75
1	cassubicifolius	LH040	LH040_G_07	LH040_G_07_SL_04	garden	LH040_07_R_carpaticola_SL_4	SL	2N	1_sexual	10	0.587528	1	1	1	1	1	1	humid_forest	48.6773	20.1067	387	-0.542224	0.952431	0.238913	0.245636	0.0860669	2.00567	0.662815	1.12145	0.801725	-1.06851	1.88277	0.324414	-0.670805	0.411077	-0.581685	-0.487027	0.0975132	-0.84058	1.83679	-0.0766506	-0.904504	0.0977886	-1.1513	8834	155	67	136	77
1	cassubicifolius	LH040	LH040_G_08	LH040_G_08_BL_01	garden	LH040_08_R_carpaticola_BL_1	BL	2N	1_sexual	10	0.587528	1	1	1	1	1	1	humid_forest	48.6773	20.1067	387	-0.542224	0.952431	0.238913	0.245636	0.0860669	2.00567	0.662815	1.12145	0.801725	-1.06851	1.88277	0.324414	-0.670805	0.411077	-0.581685	-0.487027	0.0975132	-0.84058	1.83679	-0.0766506	-0.904504	0.0977886	-1.1513	572	497	497	456	503
1	cassubicifolius	LH040	LH040_G_08	LH040_G_08_BL_02	garden	LH040_08_R_carpaticola_BL_2	BL	2N	1_sexual	10	0.587528	1	1	1	1	1	1	humid_forest	48.6773	20.1067	387	-0.542224	0.952431	0.238913	0.245636	0.0860669	2.00567	0.662815	1.12145	0.801725	-1.06851	1.88277	0.324414	-0.670805	0.411077	-0.581685	-0.487027	0.0975132	-0.84058	1.83679	-0.0766506	-0.904504	0.0977886	-1.1513	573	581	418	551	419
1	cassubicifolius	LH040	LH040_G_08	LH040_G_08_BL_03	garden	LH040_08_R_carpaticola_BL_3	BL	2N	1_sexual	10	0.587528	1	1	1	1	1	1	humid_forest	48.6773	20.1067	387	-0.542224	0.952431	0.238913	0.245636	0.0860669	2.00567	0.662815	1.12145	0.801725	-1.06851	1.88277	0.324414	-0.670805	0.411077	-0.581685	-0.487027	0.0975132	-0.84058	1.83679	-0.0766506	-0.904504	0.0977886	-1.1513	574	396	346	353	358
1	cassubicifolius	LH040	LH040_G_08	LH040_G_08_BL_04	garden	LH040_08_R_carpaticola_BL_4	BL	2N	1_sexual	10	0.587528	1	1	1	1	1	1	humid_forest	48.6773	20.1067	387	-0.542224	0.952431	0.238913	0.245636	0.0860669	2.00567	0.662815	1.12145	0.801725	-1.06851	1.88277	0.324414	-0.670805	0.411077	-0.581685	-0.487027	0.0975132	-0.84058	1.83679	-0.0766506	-0.904504	0.0977886	-1.1513	575	440	305	408	297
1	cassubicifolius	LH040	LH040_G_08	LH040_G_08_RT_01	garden	LH40_08_01	RT	2N	1_sexual	10	0.587528	1	1	1	1	1	1	humid_forest	48.6773	20.1067	387	-0.542224	0.952431	0.238913	0.245636	0.0860669	2.00567	0.662815	1.12145	0.801725	-1.06851	1.88277	0.324414	-0.670805	0.411077	-0.581685	-0.487027	0.0975132	-0.84058	1.83679	-0.0766506	-0.904504	0.0977886	-1.1513	4998	1547	414	1380	421
1	cassubicifolius	LH040	LH040_G_09	LH040_G_09_BL_01	garden	LH040_09_R_carpaticola_BL_1	BL	2N	1_sexual	10	0.587528	1	1	1	1	1	1	humid_forest	48.6773	20.1067	387	-0.542224	0.952431	0.238913	0.245636	0.0860669	2.00567	0.662815	1.12145	0.801725	-1.06851	1.88277	0.324414	-0.670805	0.411077	-0.581685	-0.487027	0.0975132	-0.84058	1.83679	-0.0766506	-0.904504	0.0977886	-1.1513	576	647	371	609	363
1	cassubicifolius	LH040	LH040_G_09	LH040_G_09_BL_03	garden	LH040_09_R_carpaticola_BL_3	BL	2N	1_sexual	10	0.587528	1	1	1	1	1	1	humid_forest	48.6773	20.1067	387	-0.542224	0.952431	0.238913	0.245636	0.0860669	2.00567	0.662815	1.12145	0.801725	-1.06851	1.88277	0.324414	-0.670805	0.411077	-0.581685	-0.487027	0.0975132	-0.84058	1.83679	-0.0766506	-0.904504	0.0977886	-1.1513	578	542	346	519	332
1	cassubicifolius	LH040	LH040_G_09	LH040_G_09_RT_01	garden	LH40_09_01	RT	2N	1_sexual	10	0.587528	1	1	1	1	1	1	humid_forest	48.6773	20.1067	387	-0.542224	0.952431	0.238913	0.245636	0.0860669	2.00567	0.662815	1.12145	0.801725	-1.06851	1.88277	0.324414	-0.670805	0.411077	-0.581685	-0.487027	0.0975132	-0.84058	1.83679	-0.0766506	-0.904504	0.0977886	-1.1513	4999	1559	593	1434	587
1	cassubicifolius	LH040	LH040_G_09	LH040_G_09_RT_02	garden	LH40_09_02	RT	2N	1_sexual	10	0.587528	1	1	1	1	1	1	humid_forest	48.6773	20.1067	387	-0.542224	0.952431	0.238913	0.245636	0.0860669	2.00567	0.662815	1.12145	0.801725	-1.06851	1.88277	0.324414	-0.670805	0.411077	-0.581685	-0.487027	0.0975132	-0.84058	1.83679	-0.0766506	-0.904504	0.0977886	-1.1513	5000	1631	342	1520	273
1	cassubicifolius	LH040	LH040_G_09	LH040_G_09_RT_03	garden	LH40_09_03	RT	2N	1_sexual	10	0.587528	1	1	1	1	1	1	humid_forest	48.6773	20.1067	387	-0.542224	0.952431	0.238913	0.245636	0.0860669	2.00567	0.662815	1.12145	0.801725	-1.06851	1.88277	0.324414	-0.670805	0.411077	-0.581685	-0.487027	0.0975132	-0.84058	1.83679	-0.0766506	-0.904504	0.0977886	-1.1513	5001	1417	258	1306	223
1	cassubicifolius	LH040	LH040_G_09	LH040_G_09_SL_01	garden	LH040_09_R_carpaticola_SL_1	SL	2N	1_sexual	10	0.587528	1	1	1	1	1	1	humid_forest	48.6773	20.1067	387	-0.542224	0.952431	0.238913	0.245636	0.0860669	2.00567	0.662815	1.12145	0.801725	-1.06851	1.88277	0.324414	-0.670805	0.411077	-0.581685	-0.487027	0.0975132	-0.84058	1.83679	-0.0766506	-0.904504	0.0977886	-1.1513	8835	62	37	45	41
1	cassubicifolius	LH040	LH040_G_09	LH040_G_09_SL_02	garden	LH040_09_R_carpaticola_SL_2	SL	2N	1_sexual	10	0.587528	1	1	1	1	1	1	humid_forest	48.6773	20.1067	387	-0.542224	0.952431	0.238913	0.245636	0.0860669	2.00567	0.662815	1.12145	0.801725	-1.06851	1.88277	0.324414	-0.670805	0.411077	-0.581685	-0.487027	0.0975132	-0.84058	1.83679	-0.0766506	-0.904504	0.0977886	-1.1513	8836	103	46	84	44
1	cassubicifolius	LH040	LH040_G_30	LH040_G_30_BL_01	garden	LH040_30_R_carpaticola_BL_1	BL	2N	1_sexual	10	0.587528	1	1	1	1	1	1	humid_forest	48.6773	20.1067	387	-0.542224	0.952431	0.238913	0.245636	0.0860669	2.00567	0.662815	1.12145	0.801725	-1.06851	1.88277	0.324414	-0.670805	0.411077	-0.581685	-0.487027	0.0975132	-0.84058	1.83679	-0.0766506	-0.904504	0.0977886	-1.1513	580	422	335	405	348
1	cassubicifolius	LH040	LH040_G_30	LH040_G_30_BL_02	garden	LH040_30_R_carpaticola_BL_2	BL	2N	1_sexual	10	0.587528	1	1	1	1	1	1	humid_forest	48.6773	20.1067	387	-0.542224	0.952431	0.238913	0.245636	0.0860669	2.00567	0.662815	1.12145	0.801725	-1.06851	1.88277	0.324414	-0.670805	0.411077	-0.581685	-0.487027	0.0975132	-0.84058	1.83679	-0.0766506	-0.904504	0.0977886	-1.1513	581	384	331	357	317
1	czywczynensis	KK263	KK263_G_02	KK263_G_02_BL_01	garden	KK263_02_BL_1_garden	BL	6N	3_apomictic_facultative_sexual	15	2.95379	1	1	1	1	NA	NA	forest	50.44	19.9804	402	-0.2122	0.931779	0.279171	-0.26163	-0.357826	0.339932	-0.343942	1.02935	-0.253106	-1.104	1.0386	0.415327	-0.979461	-0.235269	-0.943975	-0.0491804	0.520239	-0.556329	1.98177	0.66741	-0.499574	0.921763	-0.740123	391	528	237	469	286
1	czywczynensis	KK263	KK263_G_02	KK263_G_02_BL_02	garden	KK263_02_BL_2_garden	BL	6N	3_apomictic_facultative_sexual	15	2.95379	1	1	1	1	NA	NA	forest	50.44	19.9804	402	-0.2122	0.931779	0.279171	-0.26163	-0.357826	0.339932	-0.343942	1.02935	-0.253106	-1.104	1.0386	0.415327	-0.979461	-0.235269	-0.943975	-0.0491804	0.520239	-0.556329	1.98177	0.66741	-0.499574	0.921763	-0.740123	392	644	292	606	314
1	czywczynensis	KK263	KK263_G_02	KK263_G_02_RT_01	garden	KK263_02_1	RT	6N	3_apomictic_facultative_sexual	15	2.95379	1	1	1	1	NA	NA	forest	50.44	19.9804	402	-0.2122	0.931779	0.279171	-0.26163	-0.357826	0.339932	-0.343942	1.02935	-0.253106	-1.104	1.0386	0.415327	-0.979461	-0.235269	-0.943975	-0.0491804	0.520239	-0.556329	1.98177	0.66741	-0.499574	0.921763	-0.740123	4824	1489	374	1361	322
1	czywczynensis	KK263	KK263_G_02	KK263_G_02_RT_02	garden	KK263_02_2	RT	6N	3_apomictic_facultative_sexual	15	2.95379	1	1	1	1	NA	NA	forest	50.44	19.9804	402	-0.2122	0.931779	0.279171	-0.26163	-0.357826	0.339932	-0.343942	1.02935	-0.253106	-1.104	1.0386	0.415327	-0.979461	-0.235269	-0.943975	-0.0491804	0.520239	-0.556329	1.98177	0.66741	-0.499574	0.921763	-0.740123	4825	1387	442	1213	414
1	czywczynensis	KK263	KK263_G_02	KK263_G_02_SL_01	garden	KK263_02_SL_1_garden	SL	6N	3_apomictic_facultative_sexual	15	2.95379	1	1	1	1	NA	NA	forest	50.44	19.9804	402	-0.2122	0.931779	0.279171	-0.26163	-0.357826	0.339932	-0.343942	1.02935	-0.253106	-1.104	1.0386	0.415327	-0.979461	-0.235269	-0.943975	-0.0491804	0.520239	-0.556329	1.98177	0.66741	-0.499574	0.921763	-0.740123	8679	120	41	103	45
1	czywczynensis	KK263	KK263_G_02	KK263_G_02_SL_02	garden	KK263_02_SL_2_garden	SL	6N	3_apomictic_facultative_sexual	15	2.95379	1	1	1	1	NA	NA	forest	50.44	19.9804	402	-0.2122	0.931779	0.279171	-0.26163	-0.357826	0.339932	-0.343942	1.02935	-0.253106	-1.104	1.0386	0.415327	-0.979461	-0.235269	-0.943975	-0.0491804	0.520239	-0.556329	1.98177	0.66741	-0.499574	0.921763	-0.740123	8680	212	36	200	37
1	czywczynensis	KK263	KK263_G_02	KK263_G_02_SL_03	garden	KK263_02_SL_3_garden	SL	6N	3_apomictic_facultative_sexual	15	2.95379	1	1	1	1	NA	NA	forest	50.44	19.9804	402	-0.2122	0.931779	0.279171	-0.26163	-0.357826	0.339932	-0.343942	1.02935	-0.253106	-1.104	1.0386	0.415327	-0.979461	-0.235269	-0.943975	-0.0491804	0.520239	-0.556329	1.98177	0.66741	-0.499574	0.921763	-0.740123	8681	120	55	105	67
1	czywczynensis	KK263	KK263_G_03	KK263_G_03_BL_01	garden	KK263_03_BL_1_garden	BL	6N	3_apomictic_facultative_sexual	15	2.95379	1	1	1	1	NA	NA	forest	50.44	19.9804	402	-0.2122	0.931779	0.279171	-0.26163	-0.357826	0.339932	-0.343942	1.02935	-0.253106	-1.104	1.0386	0.415327	-0.979461	-0.235269	-0.943975	-0.0491804	0.520239	-0.556329	1.98177	0.66741	-0.499574	0.921763	-0.740123	393	687	272	626	299
1	czywczynensis	KK263	KK263_G_03	KK263_G_03_RT_01	garden	KK263_03_1_garden	RT	6N	3_apomictic_facultative_sexual	15	2.95379	1	1	1	1	NA	NA	forest	50.44	19.9804	402	-0.2122	0.931779	0.279171	-0.26163	-0.357826	0.339932	-0.343942	1.02935	-0.253106	-1.104	1.0386	0.415327	-0.979461	-0.235269	-0.943975	-0.0491804	0.520239	-0.556329	1.98177	0.66741	-0.499574	0.921763	-0.740123	4826	631	1171	569	1190
1	czywczynensis	KK263	KK263_G_03	KK263_G_03_RT_01	garden	KK263_03_1_garden	RT	6N	3_apomictic_facultative_sexual	15	2.95379	1	1	1	1	NA	NA	forest	50.44	19.9804	402	-0.2122	0.931779	0.279171	-0.26163	-0.357826	0.339932	-0.343942	1.02935	-0.253106	-1.104	1.0386	0.415327	-0.979461	-0.235269	-0.943975	-0.0491804	0.520239	-0.556329	1.98177	0.66741	-0.499574	0.921763	-0.740123	4827	1159	571	1050	574
1	czywczynensis	KK263	KK263_G_03	KK263_G_03_RT_02	garden	KK263_03_2_garden	RT	6N	3_apomictic_facultative_sexual	15	2.95379	1	1	1	1	NA	NA	forest	50.44	19.9804	402	-0.2122	0.931779	0.279171	-0.26163	-0.357826	0.339932	-0.343942	1.02935	-0.253106	-1.104	1.0386	0.415327	-0.979461	-0.235269	-0.943975	-0.0491804	0.520239	-0.556329	1.98177	0.66741	-0.499574	0.921763	-0.740123	4828	755	1002	646	970
1	czywczynensis	KK263	KK263_G_03	KK263_G_03_RT_02	garden	KK263_03_2_garden	RT	6N	3_apomictic_facultative_sexual	15	2.95379	1	1	1	1	NA	NA	forest	50.44	19.9804	402	-0.2122	0.931779	0.279171	-0.26163	-0.357826	0.339932	-0.343942	1.02935	-0.253106	-1.104	1.0386	0.415327	-0.979461	-0.235269	-0.943975	-0.0491804	0.520239	-0.556329	1.98177	0.66741	-0.499574	0.921763	-0.740123	4829	1385	219	1214	167
1	czywczynensis	KK263	KK263_G_03	KK263_G_03_SL_01	garden	KK263_03_SL_1_garden	SL	6N	3_apomictic_facultative_sexual	15	2.95379	1	1	1	1	NA	NA	forest	50.44	19.9804	402	-0.2122	0.931779	0.279171	-0.26163	-0.357826	0.339932	-0.343942	1.02935	-0.253106	-1.104	1.0386	0.415327	-0.979461	-0.235269	-0.943975	-0.0491804	0.520239	-0.556329	1.98177	0.66741	-0.499574	0.921763	-0.740123	8682	123	70	102	71
1	czywczynensis	KK263	KK263_G_03	KK263_G_03_SL_02	garden	KK263_03_SL_2_garden	SL	6N	3_apomictic_facultative_sexual	15	2.95379	1	1	1	1	NA	NA	forest	50.44	19.9804	402	-0.2122	0.931779	0.279171	-0.26163	-0.357826	0.339932	-0.343942	1.02935	-0.253106	-1.104	1.0386	0.415327	-0.979461	-0.235269	-0.943975	-0.0491804	0.520239	-0.556329	1.98177	0.66741	-0.499574	0.921763	-0.740123	8683	196	67	175	68
1	czywczynensis	KK263	KK263_G_03	KK263_G_03_SL_03	garden	KK263_03_SL_3_garden	SL	6N	3_apomictic_facultative_sexual	15	2.95379	1	1	1	1	NA	NA	forest	50.44	19.9804	402	-0.2122	0.931779	0.279171	-0.26163	-0.357826	0.339932	-0.343942	1.02935	-0.253106	-1.104	1.0386	0.415327	-0.979461	-0.235269	-0.943975	-0.0491804	0.520239	-0.556329	1.98177	0.66741	-0.499574	0.921763	-0.740123	8684	156	35	140	41
1	czywczynensis	KK263	KK263_G_04	KK263_G_04_BL_01	garden	KK263_04_BL_1_garden	BL	6N	3_apomictic_facultative_sexual	15	2.95379	1	1	1	1	NA	NA	forest	50.44	19.9804	402	-0.2122	0.931779	0.279171	-0.26163	-0.357826	0.339932	-0.343942	1.02935	-0.253106	-1.104	1.0386	0.415327	-0.979461	-0.235269	-0.943975	-0.0491804	0.520239	-0.556329	1.98177	0.66741	-0.499574	0.921763	-0.740123	394	766	415	733	443
1	czywczynensis	KK263	KK263_G_04	KK263_G_04_BL_02	garden	KK263_04_BL_2_garden	BL	6N	3_apomictic_facultative_sexual	15	2.95379	1	1	1	1	NA	NA	forest	50.44	19.9804	402	-0.2122	0.931779	0.279171	-0.26163	-0.357826	0.339932	-0.343942	1.02935	-0.253106	-1.104	1.0386	0.415327	-0.979461	-0.235269	-0.943975	-0.0491804	0.520239	-0.556329	1.98177	0.66741	-0.499574	0.921763	-0.740123	395	559	238	499	273
1	czywczynensis	KK263	KK263_G_04	KK263_G_04_BL_03	garden	KK263_04_BL_3_garden	BL	6N	3_apomictic_facultative_sexual	15	2.95379	1	1	1	1	NA	NA	forest	50.44	19.9804	402	-0.2122	0.931779	0.279171	-0.26163	-0.357826	0.339932	-0.343942	1.02935	-0.253106	-1.104	1.0386	0.415327	-0.979461	-0.235269	-0.943975	-0.0491804	0.520239	-0.556329	1.98177	0.66741	-0.499574	0.921763	-0.740123	396	455	616	422	691
1	czywczynensis	KK263	KK263_G_04	KK263_G_04_RT_01	garden	KK263_04_1	RT	6N	3_apomictic_facultative_sexual	15	2.95379	1	1	1	1	NA	NA	forest	50.44	19.9804	402	-0.2122	0.931779	0.279171	-0.26163	-0.357826	0.339932	-0.343942	1.02935	-0.253106	-1.104	1.0386	0.415327	-0.979461	-0.235269	-0.943975	-0.0491804	0.520239	-0.556329	1.98177	0.66741	-0.499574	0.921763	-0.740123	4830	1056	431	887	402
1	czywczynensis	KK263	KK263_G_04	KK263_G_04_RT_02	garden	KK263_04_2	RT	6N	3_apomictic_facultative_sexual	15	2.95379	1	1	1	1	NA	NA	forest	50.44	19.9804	402	-0.2122	0.931779	0.279171	-0.26163	-0.357826	0.339932	-0.343942	1.02935	-0.253106	-1.104	1.0386	0.415327	-0.979461	-0.235269	-0.943975	-0.0491804	0.520239	-0.556329	1.98177	0.66741	-0.499574	0.921763	-0.740123	4831	967	605	870	608
1	czywczynensis	KK263	KK263_G_04	KK263_G_04_SL_01	garden	KK263_04_SL_1_garden	SL	6N	3_apomictic_facultative_sexual	15	2.95379	1	1	1	1	NA	NA	forest	50.44	19.9804	402	-0.2122	0.931779	0.279171	-0.26163	-0.357826	0.339932	-0.343942	1.02935	-0.253106	-1.104	1.0386	0.415327	-0.979461	-0.235269	-0.943975	-0.0491804	0.520239	-0.556329	1.98177	0.66741	-0.499574	0.921763	-0.740123	8685	144	33	127	31
1	czywczynensis	KK263	KK263_G_04	KK263_G_04_SL_02	garden	KK263_04_SL_2_garden	SL	6N	3_apomictic_facultative_sexual	15	2.95379	1	1	1	1	NA	NA	forest	50.44	19.9804	402	-0.2122	0.931779	0.279171	-0.26163	-0.357826	0.339932	-0.343942	1.02935	-0.253106	-1.104	1.0386	0.415327	-0.979461	-0.235269	-0.943975	-0.0491804	0.520239	-0.556329	1.98177	0.66741	-0.499574	0.921763	-0.740123	8686	217	61	184	53
1	czywczynensis	KK263	KK263_G_04	KK263_G_04_SL_03	garden	KK263_04_SL_3_garden	SL	6N	3_apomictic_facultative_sexual	15	2.95379	1	1	1	1	NA	NA	forest	50.44	19.9804	402	-0.2122	0.931779	0.279171	-0.26163	-0.357826	0.339932	-0.343942	1.02935	-0.253106	-1.104	1.0386	0.415327	-0.979461	-0.235269	-0.943975	-0.0491804	0.520239	-0.556329	1.98177	0.66741	-0.499574	0.921763	-0.740123	8687	319	83	313	71
1	czywczynensis	KK263	KK263_G_05	KK263_G_05_BL_01	garden	KK263_05_BL_1_garden	BL	6N	3_apomictic_facultative_sexual	15	2.95379	1	1	1	1	NA	NA	forest	50.44	19.9804	402	-0.2122	0.931779	0.279171	-0.26163	-0.357826	0.339932	-0.343942	1.02935	-0.253106	-1.104	1.0386	0.415327	-0.979461	-0.235269	-0.943975	-0.0491804	0.520239	-0.556329	1.98177	0.66741	-0.499574	0.921763	-0.740123	397	669	298	608	334
1	czywczynensis	KK263	KK263_G_05	KK263_G_05_RT_01	garden	KK263_05_1	RT	6N	3_apomictic_facultative_sexual	15	2.95379	1	1	1	1	NA	NA	forest	50.44	19.9804	402	-0.2122	0.931779	0.279171	-0.26163	-0.357826	0.339932	-0.343942	1.02935	-0.253106	-1.104	1.0386	0.415327	-0.979461	-0.235269	-0.943975	-0.0491804	0.520239	-0.556329	1.98177	0.66741	-0.499574	0.921763	-0.740123	4832	722	428	571	436
1	czywczynensis	KK263	KK263_G_05	KK263_G_05_SL_01	garden	KK263_05_SL_1_garden	SL	6N	3_apomictic_facultative_sexual	15	2.95379	1	1	1	1	NA	NA	forest	50.44	19.9804	402	-0.2122	0.931779	0.279171	-0.26163	-0.357826	0.339932	-0.343942	1.02935	-0.253106	-1.104	1.0386	0.415327	-0.979461	-0.235269	-0.943975	-0.0491804	0.520239	-0.556329	1.98177	0.66741	-0.499574	0.921763	-0.740123	8688	197	39	180	40
1	czywczynensis	KK263	KK263_G_05	KK263_G_05_SL_02	garden	KK263_05_SL_2_garden	SL	6N	3_apomictic_facultative_sexual	15	2.95379	1	1	1	1	NA	NA	forest	50.44	19.9804	402	-0.2122	0.931779	0.279171	-0.26163	-0.357826	0.339932	-0.343942	1.02935	-0.253106	-1.104	1.0386	0.415327	-0.979461	-0.235269	-0.943975	-0.0491804	0.520239	-0.556329	1.98177	0.66741	-0.499574	0.921763	-0.740123	8689	98	57	85	80
1	czywczynensis	KK263	KK263_G_05	KK263_G_05_SL_03	garden	KK263_05_SL_3_garden	SL	6N	3_apomictic_facultative_sexual	15	2.95379	1	1	1	1	NA	NA	forest	50.44	19.9804	402	-0.2122	0.931779	0.279171	-0.26163	-0.357826	0.339932	-0.343942	1.02935	-0.253106	-1.104	1.0386	0.415327	-0.979461	-0.235269	-0.943975	-0.0491804	0.520239	-0.556329	1.98177	0.66741	-0.499574	0.921763	-0.740123	8690	63	41	56	57
1	czywczynensis	KK263	KK263_G_06	KK263_G_06_BL_01	garden	KK263_06_BL_1_garden	BL	6N	3_apomictic_facultative_sexual	15	2.95379	1	1	1	1	NA	NA	forest	50.44	19.9804	402	-0.2122	0.931779	0.279171	-0.26163	-0.357826	0.339932	-0.343942	1.02935	-0.253106	-1.104	1.0386	0.415327	-0.979461	-0.235269	-0.943975	-0.0491804	0.520239	-0.556329	1.98177	0.66741	-0.499574	0.921763	-0.740123	398	485	319	457	333
1	czywczynensis	KK263	KK263_G_06	KK263_G_06_RT_01	garden	KK263_06_1	RT	6N	3_apomictic_facultative_sexual	15	2.95379	1	1	1	1	NA	NA	forest	50.44	19.9804	402	-0.2122	0.931779	0.279171	-0.26163	-0.357826	0.339932	-0.343942	1.02935	-0.253106	-1.104	1.0386	0.415327	-0.979461	-0.235269	-0.943975	-0.0491804	0.520239	-0.556329	1.98177	0.66741	-0.499574	0.921763	-0.740123	4833	1081	767	944	782
1	czywczynensis	KK263	KK263_G_06	KK263_G_06_RT_02	garden	KK263_06_2	RT	6N	3_apomictic_facultative_sexual	15	2.95379	1	1	1	1	NA	NA	forest	50.44	19.9804	402	-0.2122	0.931779	0.279171	-0.26163	-0.357826	0.339932	-0.343942	1.02935	-0.253106	-1.104	1.0386	0.415327	-0.979461	-0.235269	-0.943975	-0.0491804	0.520239	-0.556329	1.98177	0.66741	-0.499574	0.921763	-0.740123	4834	1509	337	1327	285
1	czywczynensis	KK263	KK263_G_06	KK263_G_06_SL_01	garden	KK263_06_SL_1_garden	SL	6N	3_apomictic_facultative_sexual	15	2.95379	1	1	1	1	NA	NA	forest	50.44	19.9804	402	-0.2122	0.931779	0.279171	-0.26163	-0.357826	0.339932	-0.343942	1.02935	-0.253106	-1.104	1.0386	0.415327	-0.979461	-0.235269	-0.943975	-0.0491804	0.520239	-0.556329	1.98177	0.66741	-0.499574	0.921763	-0.740123	8691	192	46	181	34
1	czywczynensis	KK263	KK263_G_06	KK263_G_06_SL_02	garden	KK263_06_SL_2_garden	SL	6N	3_apomictic_facultative_sexual	15	2.95379	1	1	1	1	NA	NA	forest	50.44	19.9804	402	-0.2122	0.931779	0.279171	-0.26163	-0.357826	0.339932	-0.343942	1.02935	-0.253106	-1.104	1.0386	0.415327	-0.979461	-0.235269	-0.943975	-0.0491804	0.520239	-0.556329	1.98177	0.66741	-0.499574	0.921763	-0.740123	8692	202	69	184	58
1	czywczynensis	KK263	KK263_G_06	KK263_G_06_SL_03	garden	KK263_06_SL_3_garden	SL	6N	3_apomictic_facultative_sexual	15	2.95379	1	1	1	1	NA	NA	forest	50.44	19.9804	402	-0.2122	0.931779	0.279171	-0.26163	-0.357826	0.339932	-0.343942	1.02935	-0.253106	-1.104	1.0386	0.415327	-0.979461	-0.235269	-0.943975	-0.0491804	0.520239	-0.556329	1.98177	0.66741	-0.499574	0.921763	-0.740123	8693	237	36	218	25
1	czywczynensis	KK263	KK263_H_01	KK263_H_01_BL_01	herbar	KK263_L01_BL_herbar	BL	6N	3_apomictic_facultative_sexual	15	2.95379	1	1	1	1	NA	NA	forest	50.44	19.9804	402	-0.2122	0.931779	0.279171	-0.26163	-0.357826	0.339932	-0.343942	1.02935	-0.253106	-1.104	1.0386	0.415327	-0.979461	-0.235269	-0.943975	-0.0491804	0.520239	-0.556329	1.98177	0.66741	-0.499574	0.921763	-0.740123	399	784	453	734	492
1	czywczynensis	KK263	KK263_H_01	KK263_H_01_RT_01	herbar	KK263_L01_herbar	RT	6N	3_apomictic_facultative_sexual	15	2.95379	1	1	1	1	NA	NA	forest	50.44	19.9804	402	-0.2122	0.931779	0.279171	-0.26163	-0.357826	0.339932	-0.343942	1.02935	-0.253106	-1.104	1.0386	0.415327	-0.979461	-0.235269	-0.943975	-0.0491804	0.520239	-0.556329	1.98177	0.66741	-0.499574	0.921763	-0.740123	4835	495	1186	400	1180
1	czywczynensis	KK263	KK263_H_01	KK263_H_01_SL_01	herbar	KK263_L01_SL_herbar	SL	6N	3_apomictic_facultative_sexual	15	2.95379	1	1	1	1	NA	NA	forest	50.44	19.9804	402	-0.2122	0.931779	0.279171	-0.26163	-0.357826	0.339932	-0.343942	1.02935	-0.253106	-1.104	1.0386	0.415327	-0.979461	-0.235269	-0.943975	-0.0491804	0.520239	-0.556329	1.98177	0.66741	-0.499574	0.921763	-0.740123	8694	1102	892	1095	891
1	czywczynensis	KK263	KK263_H_04	KK263_H_04_BL_01	herbar	KK263_L04_BL_herbar	BL	6N	3_apomictic_facultative_sexual	15	2.95379	1	1	1	1	NA	NA	forest	50.44	19.9804	402	-0.2122	0.931779	0.279171	-0.26163	-0.357826	0.339932	-0.343942	1.02935	-0.253106	-1.104	1.0386	0.415327	-0.979461	-0.235269	-0.943975	-0.0491804	0.520239	-0.556329	1.98177	0.66741	-0.499574	0.921763	-0.740123	400	732	409	691	435
1	czywczynensis	KK263	KK263_H_04	KK263_H_04_RT_01	herbar	KK263_L04_herbar	RT	6N	3_apomictic_facultative_sexual	15	2.95379	1	1	1	1	NA	NA	forest	50.44	19.9804	402	-0.2122	0.931779	0.279171	-0.26163	-0.357826	0.339932	-0.343942	1.02935	-0.253106	-1.104	1.0386	0.415327	-0.979461	-0.235269	-0.943975	-0.0491804	0.520239	-0.556329	1.98177	0.66741	-0.499574	0.921763	-0.740123	4836	482	1152	400	1167
1	czywczynensis	KK263	KK263_H_04	KK263_H_04_SL_01	herbar	KK263_L04_SL_herbar	SL	6N	3_apomictic_facultative_sexual	15	2.95379	1	1	1	1	NA	NA	forest	50.44	19.9804	402	-0.2122	0.931779	0.279171	-0.26163	-0.357826	0.339932	-0.343942	1.02935	-0.253106	-1.104	1.0386	0.415327	-0.979461	-0.235269	-0.943975	-0.0491804	0.520239	-0.556329	1.98177	0.66741	-0.499574	0.921763	-0.740123	8695	903	739	897	734
1	czywczynensis	KK263	KK263_H_05	KK263_H_05_BL_01	herbar	KK263_L05_BL_herbar	BL	6N	3_apomictic_facultative_sexual	15	2.95379	1	1	1	1	NA	NA	forest	50.44	19.9804	402	-0.2122	0.931779	0.279171	-0.26163	-0.357826	0.339932	-0.343942	1.02935	-0.253106	-1.104	1.0386	0.415327	-0.979461	-0.235269	-0.943975	-0.0491804	0.520239	-0.556329	1.98177	0.66741	-0.499574	0.921763	-0.740123	401	807	501	779	501
1	czywczynensis	KK263	KK263_H_05	KK263_H_05_RT_01	herbar	KK263_L05_herbar	RT	6N	3_apomictic_facultative_sexual	15	2.95379	1	1	1	1	NA	NA	forest	50.44	19.9804	402	-0.2122	0.931779	0.279171	-0.26163	-0.357826	0.339932	-0.343942	1.02935	-0.253106	-1.104	1.0386	0.415327	-0.979461	-0.235269	-0.943975	-0.0491804	0.520239	-0.556329	1.98177	0.66741	-0.499574	0.921763	-0.740123	4837	395	1206	293	1210
1	czywczynensis	KK263	KK263_H_05	KK263_H_05_SL_01	herbar	KK263_L05_SL_herbar	SL	6N	3_apomictic_facultative_sexual	15	2.95379	1	1	1	1	NA	NA	forest	50.44	19.9804	402	-0.2122	0.931779	0.279171	-0.26163	-0.357826	0.339932	-0.343942	1.02935	-0.253106	-1.104	1.0386	0.415327	-0.979461	-0.235269	-0.943975	-0.0491804	0.520239	-0.556329	1.98177	0.66741	-0.499574	0.921763	-0.740123	8696	771	675	765	672
1	czywczynensis	LH042	LH042_G_01	LH042_G_01_RT_01	garden	LH042_01_1	RT	6N	2_apomictic_obligate_asexual	2	1.47258	1	1	1	NA	NA	NA	humid_meadow	49.076	19.0195	452	-0.46758	0.774694	0.413362	0.138429	-0.50579	1.45043	0.411126	0.778538	-0.0613185	-1.24592	1.36019	0.29411	-0.953739	-0.470304	-0.943975	0.876267	1.61932	0.509614	0.966915	1.32036	0.422765	1.60313	0.226149	5020	725	928	637	908
1	czywczynensis	LH042	LH042_G_01	LH042_G_01_RT_02	garden	LH042_01_2	RT	6N	2_apomictic_obligate_asexual	2	1.47258	1	1	1	NA	NA	NA	humid_meadow	49.076	19.0195	452	-0.46758	0.774694	0.413362	0.138429	-0.50579	1.45043	0.411126	0.778538	-0.0613185	-1.24592	1.36019	0.29411	-0.953739	-0.470304	-0.943975	0.876267	1.61932	0.509614	0.966915	1.32036	0.422765	1.60313	0.226149	5021	1453	458	1275	432
1	czywczynensis	LH042	LH042_G_01	LH042_G_01_SL_01	garden	LH042_01_SL_1	SL	6N	2_apomictic_obligate_asexual	2	1.47258	1	1	1	NA	NA	NA	humid_meadow	49.076	19.0195	452	-0.46758	0.774694	0.413362	0.138429	-0.50579	1.45043	0.411126	0.778538	-0.0613185	-1.24592	1.36019	0.29411	-0.953739	-0.470304	-0.943975	0.876267	1.61932	0.509614	0.966915	1.32036	0.422765	1.60313	0.226149	8862	146	113	129	120
1	czywczynensis	LH042	LH042_G_01	LH042_G_01_SL_02	garden	LH042_01_SL_2	SL	6N	2_apomictic_obligate_asexual	2	1.47258	1	1	1	NA	NA	NA	humid_meadow	49.076	19.0195	452	-0.46758	0.774694	0.413362	0.138429	-0.50579	1.45043	0.411126	0.778538	-0.0613185	-1.24592	1.36019	0.29411	-0.953739	-0.470304	-0.943975	0.876267	1.61932	0.509614	0.966915	1.32036	0.422765	1.60313	0.226149	8863	126	177	109	191
1	czywczynensis	LH042	LH042_G_03	LH042_G_03_RT_01	garden	LH042_03_1	RT	6N	2_apomictic_obligate_asexual	2	1.47258	1	1	1	NA	NA	NA	humid_meadow	49.076	19.0195	452	-0.46758	0.774694	0.413362	0.138429	-0.50579	1.45043	0.411126	0.778538	-0.0613185	-1.24592	1.36019	0.29411	-0.953739	-0.470304	-0.943975	0.876267	1.61932	0.509614	0.966915	1.32036	0.422765	1.60313	0.226149	5022	1211	960	1057	964
1	czywczynensis	LH042	LH042_G_03	LH042_G_03_RT_02	garden	LH042_03_2	RT	6N	2_apomictic_obligate_asexual	2	1.47258	1	1	1	NA	NA	NA	humid_meadow	49.076	19.0195	452	-0.46758	0.774694	0.413362	0.138429	-0.50579	1.45043	0.411126	0.778538	-0.0613185	-1.24592	1.36019	0.29411	-0.953739	-0.470304	-0.943975	0.876267	1.61932	0.509614	0.966915	1.32036	0.422765	1.60313	0.226149	5023	1027	998	909	1005
1	czywczynensis	LH042	LH042_G_03	LH042_G_03_SL_01	garden	LH042_03_SL_1	SL	6N	2_apomictic_obligate_asexual	2	1.47258	1	1	1	NA	NA	NA	humid_meadow	49.076	19.0195	452	-0.46758	0.774694	0.413362	0.138429	-0.50579	1.45043	0.411126	0.778538	-0.0613185	-1.24592	1.36019	0.29411	-0.953739	-0.470304	-0.943975	0.876267	1.61932	0.509614	0.966915	1.32036	0.422765	1.60313	0.226149	8864	61	100	41	105
1	czywczynensis	LH042	LH042_G_03	LH042_G_03_SL_02	garden	LH042_03_SL_2	SL	6N	2_apomictic_obligate_asexual	2	1.47258	1	1	1	NA	NA	NA	humid_meadow	49.076	19.0195	452	-0.46758	0.774694	0.413362	0.138429	-0.50579	1.45043	0.411126	0.778538	-0.0613185	-1.24592	1.36019	0.29411	-0.953739	-0.470304	-0.943975	0.876267	1.61932	0.509614	0.966915	1.32036	0.422765	1.60313	0.226149	8865	237	99	217	102
1	czywczynensis	LH042	LH042_G_03	LH042_G_03_SL_03	garden	LH042_03_SL_3	SL	6N	2_apomictic_obligate_asexual	2	1.47258	1	1	1	NA	NA	NA	humid_meadow	49.076	19.0195	452	-0.46758	0.774694	0.413362	0.138429	-0.50579	1.45043	0.411126	0.778538	-0.0613185	-1.24592	1.36019	0.29411	-0.953739	-0.470304	-0.943975	0.876267	1.61932	0.509614	0.966915	1.32036	0.422765	1.60313	0.226149	8866	182	177	173	177
1	czywczynensis	LH042	LH042_G_04	LH042_G_04_RT_01	garden	LH042_04_1	RT	6N	2_apomictic_obligate_asexual	2	1.47258	1	1	1	NA	NA	NA	humid_meadow	49.076	19.0195	452	-0.46758	0.774694	0.413362	0.138429	-0.50579	1.45043	0.411126	0.778538	-0.0613185	-1.24592	1.36019	0.29411	-0.953739	-0.470304	-0.943975	0.876267	1.61932	0.509614	0.966915	1.32036	0.422765	1.60313	0.226149	5024	1282	653	1102	681
1	czywczynensis	LH042	LH042_G_04	LH042_G_04_RT_02	garden	LH042_04_2	RT	6N	2_apomictic_obligate_asexual	2	1.47258	1	1	1	NA	NA	NA	humid_meadow	49.076	19.0195	452	-0.46758	0.774694	0.413362	0.138429	-0.50579	1.45043	0.411126	0.778538	-0.0613185	-1.24592	1.36019	0.29411	-0.953739	-0.470304	-0.943975	0.876267	1.61932	0.509614	0.966915	1.32036	0.422765	1.60313	0.226149	5025	1166	439	1065	389
1	czywczynensis	LH042	LH042_G_04	LH042_G_04_SL_01	garden	LH042_04_SL_1	SL	6N	2_apomictic_obligate_asexual	2	1.47258	1	1	1	NA	NA	NA	humid_meadow	49.076	19.0195	452	-0.46758	0.774694	0.413362	0.138429	-0.50579	1.45043	0.411126	0.778538	-0.0613185	-1.24592	1.36019	0.29411	-0.953739	-0.470304	-0.943975	0.876267	1.61932	0.509614	0.966915	1.32036	0.422765	1.60313	0.226149	8867	254	204	231	200
1	czywczynensis	LH042	LH042_G_04	LH042_G_04_SL_02	garden	LH042_04_SL_2	SL	6N	2_apomictic_obligate_asexual	2	1.47258	1	1	1	NA	NA	NA	humid_meadow	49.076	19.0195	452	-0.46758	0.774694	0.413362	0.138429	-0.50579	1.45043	0.411126	0.778538	-0.0613185	-1.24592	1.36019	0.29411	-0.953739	-0.470304	-0.943975	0.876267	1.61932	0.509614	0.966915	1.32036	0.422765	1.60313	0.226149	8868	143	159	127	164
1	czywczynensis	LH042	LH042_G_05	LH042_G_05_BL_01	garden	LH042_05_BL_1_garden	BL	6N	2_apomictic_obligate_asexual	2	1.47258	1	1	1	NA	NA	NA	humid_meadow	49.076	19.0195	452	-0.46758	0.774694	0.413362	0.138429	-0.50579	1.45043	0.411126	0.778538	-0.0613185	-1.24592	1.36019	0.29411	-0.953739	-0.470304	-0.943975	0.876267	1.61932	0.509614	0.966915	1.32036	0.422765	1.60313	0.226149	610	422	198	365	212
1	czywczynensis	LH042	LH042_G_05	LH042_G_05_RT_01	garden	LH042_05_1	RT	6N	2_apomictic_obligate_asexual	2	1.47258	1	1	1	NA	NA	NA	humid_meadow	49.076	19.0195	452	-0.46758	0.774694	0.413362	0.138429	-0.50579	1.45043	0.411126	0.778538	-0.0613185	-1.24592	1.36019	0.29411	-0.953739	-0.470304	-0.943975	0.876267	1.61932	0.509614	0.966915	1.32036	0.422765	1.60313	0.226149	5026	911	484	759	460
1	czywczynensis	LH042	LH042_G_05	LH042_G_05_RT_02	garden	LH042_05_2	RT	6N	2_apomictic_obligate_asexual	2	1.47258	1	1	1	NA	NA	NA	humid_meadow	49.076	19.0195	452	-0.46758	0.774694	0.413362	0.138429	-0.50579	1.45043	0.411126	0.778538	-0.0613185	-1.24592	1.36019	0.29411	-0.953739	-0.470304	-0.943975	0.876267	1.61932	0.509614	0.966915	1.32036	0.422765	1.60313	0.226149	5027	1115	756	950	754
1	czywczynensis	LH042	LH042_G_05	LH042_G_05_SL_01	garden	LH042_05_SL_1_garden	SL	6N	2_apomictic_obligate_asexual	2	1.47258	1	1	1	NA	NA	NA	humid_meadow	49.076	19.0195	452	-0.46758	0.774694	0.413362	0.138429	-0.50579	1.45043	0.411126	0.778538	-0.0613185	-1.24592	1.36019	0.29411	-0.953739	-0.470304	-0.943975	0.876267	1.61932	0.509614	0.966915	1.32036	0.422765	1.60313	0.226149	8869	128	37	117	37
1	czywczynensis	LH042	LH042_G_05	LH042_G_05_SL_02	garden	LH042_05_SL_2_garden	SL	6N	2_apomictic_obligate_asexual	2	1.47258	1	1	1	NA	NA	NA	humid_meadow	49.076	19.0195	452	-0.46758	0.774694	0.413362	0.138429	-0.50579	1.45043	0.411126	0.778538	-0.0613185	-1.24592	1.36019	0.29411	-0.953739	-0.470304	-0.943975	0.876267	1.61932	0.509614	0.966915	1.32036	0.422765	1.60313	0.226149	8870	129	38	120	43
1	czywczynensis	LH042	LH042_G_06	LH042_G_06_RT_02	garden	LH042_06_2	RT	6N	2_apomictic_obligate_asexual	2	1.47258	1	1	1	NA	NA	NA	humid_meadow	49.076	19.0195	452	-0.46758	0.774694	0.413362	0.138429	-0.50579	1.45043	0.411126	0.778538	-0.0613185	-1.24592	1.36019	0.29411	-0.953739	-0.470304	-0.943975	0.876267	1.61932	0.509614	0.966915	1.32036	0.422765	1.60313	0.226149	5028	1273	705	1121	702
1	czywczynensis	LH042	LH042_G_06	LH042_G_06_SL_01	garden	LH042_06_SL_1	SL	6N	2_apomictic_obligate_asexual	2	1.47258	1	1	1	NA	NA	NA	humid_meadow	49.076	19.0195	452	-0.46758	0.774694	0.413362	0.138429	-0.50579	1.45043	0.411126	0.778538	-0.0613185	-1.24592	1.36019	0.29411	-0.953739	-0.470304	-0.943975	0.876267	1.61932	0.509614	0.966915	1.32036	0.422765	1.60313	0.226149	8871	230	143	218	150
1	czywczynensis	LH042	LH042_G_06	LH042_G_06_SL_02	garden	LH042_06_SL_2	SL	6N	2_apomictic_obligate_asexual	2	1.47258	1	1	1	NA	NA	NA	humid_meadow	49.076	19.0195	452	-0.46758	0.774694	0.413362	0.138429	-0.50579	1.45043	0.411126	0.778538	-0.0613185	-1.24592	1.36019	0.29411	-0.953739	-0.470304	-0.943975	0.876267	1.61932	0.509614	0.966915	1.32036	0.422765	1.60313	0.226149	8872	209	98	202	118
1	czywczynensis	LH042	LH042_G_08	LH042_G_08_SL_01	garden	LH042_08_SL_1	SL	6N	2_apomictic_obligate_asexual	2	1.47258	1	1	1	NA	NA	NA	humid_meadow	49.076	19.0195	452	-0.46758	0.774694	0.413362	0.138429	-0.50579	1.45043	0.411126	0.778538	-0.0613185	-1.24592	1.36019	0.29411	-0.953739	-0.470304	-0.943975	0.876267	1.61932	0.509614	0.966915	1.32036	0.422765	1.60313	0.226149	8873	208	253	184	258
1	czywczynensis	LH042	LH042_G_10	LH042_G_10_BL_01	garden	LH042_10_BL_1_garden	BL	6N	2_apomictic_obligate_asexual	2	1.47258	1	1	1	NA	NA	NA	humid_meadow	49.076	19.0195	452	-0.46758	0.774694	0.413362	0.138429	-0.50579	1.45043	0.411126	0.778538	-0.0613185	-1.24592	1.36019	0.29411	-0.953739	-0.470304	-0.943975	0.876267	1.61932	0.509614	0.966915	1.32036	0.422765	1.60313	0.226149	611	416	244	382	264
1	czywczynensis	LH042	LH042_G_10	LH042_G_10_BL_02	garden	LH042_10_BL_2_garden	BL	6N	2_apomictic_obligate_asexual	2	1.47258	1	1	1	NA	NA	NA	humid_meadow	49.076	19.0195	452	-0.46758	0.774694	0.413362	0.138429	-0.50579	1.45043	0.411126	0.778538	-0.0613185	-1.24592	1.36019	0.29411	-0.953739	-0.470304	-0.943975	0.876267	1.61932	0.509614	0.966915	1.32036	0.422765	1.60313	0.226149	612	265	102	235	118
1	czywczynensis	LH042	LH042_G_10	LH042_G_10_RT_01	garden	LH042_10_1	RT	6N	2_apomictic_obligate_asexual	2	1.47258	1	1	1	NA	NA	NA	humid_meadow	49.076	19.0195	452	-0.46758	0.774694	0.413362	0.138429	-0.50579	1.45043	0.411126	0.778538	-0.0613185	-1.24592	1.36019	0.29411	-0.953739	-0.470304	-0.943975	0.876267	1.61932	0.509614	0.966915	1.32036	0.422765	1.60313	0.226149	5029	875	570	690	591
1	czywczynensis	LH042	LH042_G_10	LH042_G_10_SL_01	garden	LH042_10_SL_1_garden	SL	6N	2_apomictic_obligate_asexual	2	1.47258	1	1	1	NA	NA	NA	humid_meadow	49.076	19.0195	452	-0.46758	0.774694	0.413362	0.138429	-0.50579	1.45043	0.411126	0.778538	-0.0613185	-1.24592	1.36019	0.29411	-0.953739	-0.470304	-0.943975	0.876267	1.61932	0.509614	0.966915	1.32036	0.422765	1.60313	0.226149	8874	81	38	65	35
1	czywczynensis	LH042	LH042_G_10	LH042_G_10_SL_02	garden	LH042_10_SL_2_garden	SL	6N	2_apomictic_obligate_asexual	2	1.47258	1	1	1	NA	NA	NA	humid_meadow	49.076	19.0195	452	-0.46758	0.774694	0.413362	0.138429	-0.50579	1.45043	0.411126	0.778538	-0.0613185	-1.24592	1.36019	0.29411	-0.953739	-0.470304	-0.943975	0.876267	1.61932	0.509614	0.966915	1.32036	0.422765	1.60313	0.226149	8875	39	33	23	36
1	dispar	10453	10453_G_01	10453_G_01_BL_01	garden	10453_1_BL_1_garden	BL	4N	3_apomictic_facultative_sexual	3	1.76533	1	1	1	1	1	1	forest	60.3775	23.0566	28	1.64838	1.43468	-0.724578	-1.28525	-1.39358	-0.492938	-1.3507	1.57064	-0.540787	-1.6362	1.40039	-0.221065	-0.902297	-0.646581	-1.58805	-0.536782	-0.536575	-0.627392	0.531976	-0.532198	-0.702039	-0.599421	-0.370062	70	602	369	570	370
1	dispar	10453	10453_G_01	10453_G_01_BL_02	garden	10453_1_BL_2_garden	BL	4N	3_apomictic_facultative_sexual	3	1.76533	1	1	1	1	1	1	forest	60.3775	23.0566	28	1.64838	1.43468	-0.724578	-1.28525	-1.39358	-0.492938	-1.3507	1.57064	-0.540787	-1.6362	1.40039	-0.221065	-0.902297	-0.646581	-1.58805	-0.536782	-0.536575	-0.627392	0.531976	-0.532198	-0.702039	-0.599421	-0.370062	71	643	417	617	400
1	dispar	10453	10453_G_01	10453_G_01_BL_03	garden	10453_1_BL_3_garden	BL	4N	3_apomictic_facultative_sexual	3	1.76533	1	1	1	1	1	1	forest	60.3775	23.0566	28	1.64838	1.43468	-0.724578	-1.28525	-1.39358	-0.492938	-1.3507	1.57064	-0.540787	-1.6362	1.40039	-0.221065	-0.902297	-0.646581	-1.58805	-0.536782	-0.536575	-0.627392	0.531976	-0.532198	-0.702039	-0.599421	-0.370062	72	669	430	630	426
1	dispar	10453	10453_G_01	10453_G_01_RT_01	garden	10453_1_1	RT	4N	3_apomictic_facultative_sexual	3	1.76533	1	1	1	1	1	1	forest	60.3775	23.0566	28	1.64838	1.43468	-0.724578	-1.28525	-1.39358	-0.492938	-1.3507	1.57064	-0.540787	-1.6362	1.40039	-0.221065	-0.902297	-0.646581	-1.58805	-0.536782	-0.536575	-0.627392	0.531976	-0.532198	-0.702039	-0.599421	-0.370062	4513	1403	633	1262	618
1	dispar	10453	10453_G_01	10453_G_01_RT_02	garden	10453_1_2	RT	4N	3_apomictic_facultative_sexual	3	1.76533	1	1	1	1	1	1	forest	60.3775	23.0566	28	1.64838	1.43468	-0.724578	-1.28525	-1.39358	-0.492938	-1.3507	1.57064	-0.540787	-1.6362	1.40039	-0.221065	-0.902297	-0.646581	-1.58805	-0.536782	-0.536575	-0.627392	0.531976	-0.532198	-0.702039	-0.599421	-0.370062	4514	1316	423	1172	392
1	dispar	10453	10453_G_01	10453_G_01_SL_01	garden	10453_1_SL_1	SL	4N	3_apomictic_facultative_sexual	3	1.76533	1	1	1	1	1	1	forest	60.3775	23.0566	28	1.64838	1.43468	-0.724578	-1.28525	-1.39358	-0.492938	-1.3507	1.57064	-0.540787	-1.6362	1.40039	-0.221065	-0.902297	-0.646581	-1.58805	-0.536782	-0.536575	-0.627392	0.531976	-0.532198	-0.702039	-0.599421	-0.370062	8331	64	30	57	30
1	dispar	10453	10453_G_01	10453_G_01_SL_02	garden	10453_1_SL_2	SL	4N	3_apomictic_facultative_sexual	3	1.76533	1	1	1	1	1	1	forest	60.3775	23.0566	28	1.64838	1.43468	-0.724578	-1.28525	-1.39358	-0.492938	-1.3507	1.57064	-0.540787	-1.6362	1.40039	-0.221065	-0.902297	-0.646581	-1.58805	-0.536782	-0.536575	-0.627392	0.531976	-0.532198	-0.702039	-0.599421	-0.370062	8332	88	43	82	51
1	dispar	10453	10453_G_01	10453_G_01_SL_03	garden	10453_1_SL_3	SL	4N	3_apomictic_facultative_sexual	3	1.76533	1	1	1	1	1	1	forest	60.3775	23.0566	28	1.64838	1.43468	-0.724578	-1.28525	-1.39358	-0.492938	-1.3507	1.57064	-0.540787	-1.6362	1.40039	-0.221065	-0.902297	-0.646581	-1.58805	-0.536782	-0.536575	-0.627392	0.531976	-0.532198	-0.702039	-0.599421	-0.370062	8333	104	15	94	12
1	dispar	10453	10453_G_02	10453_G_02_BL_01	garden	10453_2_BL_1_garden	BL	4N	3_apomictic_facultative_sexual	3	1.76533	1	1	1	1	1	1	forest	60.3775	23.0566	28	1.64838	1.43468	-0.724578	-1.28525	-1.39358	-0.492938	-1.3507	1.57064	-0.540787	-1.6362	1.40039	-0.221065	-0.902297	-0.646581	-1.58805	-0.536782	-0.536575	-0.627392	0.531976	-0.532198	-0.702039	-0.599421	-0.370062	73	488	213	439	204
1	dispar	10453	10453_G_02	10453_G_02_BL_02	garden	10453_2_BL_2_garden	BL	4N	3_apomictic_facultative_sexual	3	1.76533	1	1	1	1	1	1	forest	60.3775	23.0566	28	1.64838	1.43468	-0.724578	-1.28525	-1.39358	-0.492938	-1.3507	1.57064	-0.540787	-1.6362	1.40039	-0.221065	-0.902297	-0.646581	-1.58805	-0.536782	-0.536575	-0.627392	0.531976	-0.532198	-0.702039	-0.599421	-0.370062	74	744	500	703	487
1	dispar	10453	10453_G_02	10453_G_02_BL_03	garden	10453_2_BL_3_garden	BL	4N	3_apomictic_facultative_sexual	3	1.76533	1	1	1	1	1	1	forest	60.3775	23.0566	28	1.64838	1.43468	-0.724578	-1.28525	-1.39358	-0.492938	-1.3507	1.57064	-0.540787	-1.6362	1.40039	-0.221065	-0.902297	-0.646581	-1.58805	-0.536782	-0.536575	-0.627392	0.531976	-0.532198	-0.702039	-0.599421	-0.370062	75	562	209	524	216
1	dispar	10453	10453_G_02	10453_G_02_RT_01	garden	10453_2_1	RT	4N	3_apomictic_facultative_sexual	3	1.76533	1	1	1	1	1	1	forest	60.3775	23.0566	28	1.64838	1.43468	-0.724578	-1.28525	-1.39358	-0.492938	-1.3507	1.57064	-0.540787	-1.6362	1.40039	-0.221065	-0.902297	-0.646581	-1.58805	-0.536782	-0.536575	-0.627392	0.531976	-0.532198	-0.702039	-0.599421	-0.370062	4515	1073	459	1004	419
1	dispar	10453	10453_G_02	10453_G_02_RT_02	garden	10453_2_2	RT	4N	3_apomictic_facultative_sexual	3	1.76533	1	1	1	1	1	1	forest	60.3775	23.0566	28	1.64838	1.43468	-0.724578	-1.28525	-1.39358	-0.492938	-1.3507	1.57064	-0.540787	-1.6362	1.40039	-0.221065	-0.902297	-0.646581	-1.58805	-0.536782	-0.536575	-0.627392	0.531976	-0.532198	-0.702039	-0.599421	-0.370062	4516	1255	434	1156	402
1	dispar	10453	10453_G_02	10453_G_02_SL_01	garden	10453_2_SL_1	SL	4N	3_apomictic_facultative_sexual	3	1.76533	1	1	1	1	1	1	forest	60.3775	23.0566	28	1.64838	1.43468	-0.724578	-1.28525	-1.39358	-0.492938	-1.3507	1.57064	-0.540787	-1.6362	1.40039	-0.221065	-0.902297	-0.646581	-1.58805	-0.536782	-0.536575	-0.627392	0.531976	-0.532198	-0.702039	-0.599421	-0.370062	8334	80	37	74	43
1	dispar	10453	10453_G_02	10453_G_02_SL_02	garden	10453_2_SL_2	SL	4N	3_apomictic_facultative_sexual	3	1.76533	1	1	1	1	1	1	forest	60.3775	23.0566	28	1.64838	1.43468	-0.724578	-1.28525	-1.39358	-0.492938	-1.3507	1.57064	-0.540787	-1.6362	1.40039	-0.221065	-0.902297	-0.646581	-1.58805	-0.536782	-0.536575	-0.627392	0.531976	-0.532198	-0.702039	-0.599421	-0.370062	8335	217	16	206	16
1	dispar	10453	10453_G_02	10453_G_02_SL_03	garden	10453_2_SL_3	SL	4N	3_apomictic_facultative_sexual	3	1.76533	1	1	1	1	1	1	forest	60.3775	23.0566	28	1.64838	1.43468	-0.724578	-1.28525	-1.39358	-0.492938	-1.3507	1.57064	-0.540787	-1.6362	1.40039	-0.221065	-0.902297	-0.646581	-1.58805	-0.536782	-0.536575	-0.627392	0.531976	-0.532198	-0.702039	-0.599421	-0.370062	8336	113	37	101	45
1	dispar	10453	10453_G_03	10453_G_03_BL_01	garden	10453_3_BL_1_garden	BL	4N	3_apomictic_facultative_sexual	3	1.76533	1	1	1	1	1	1	forest	60.3775	23.0566	28	1.64838	1.43468	-0.724578	-1.28525	-1.39358	-0.492938	-1.3507	1.57064	-0.540787	-1.6362	1.40039	-0.221065	-0.902297	-0.646581	-1.58805	-0.536782	-0.536575	-0.627392	0.531976	-0.532198	-0.702039	-0.599421	-0.370062	76	695	471	660	473
1	dispar	10453	10453_G_03	10453_G_03_BL_02	garden	10453_3_BL_2_garden	BL	4N	3_apomictic_facultative_sexual	3	1.76533	1	1	1	1	1	1	forest	60.3775	23.0566	28	1.64838	1.43468	-0.724578	-1.28525	-1.39358	-0.492938	-1.3507	1.57064	-0.540787	-1.6362	1.40039	-0.221065	-0.902297	-0.646581	-1.58805	-0.536782	-0.536575	-0.627392	0.531976	-0.532198	-0.702039	-0.599421	-0.370062	77	752	430	712	439
1	dispar	10453	10453_G_03	10453_G_03_RT_01	garden	10453_3_1	RT	4N	3_apomictic_facultative_sexual	3	1.76533	1	1	1	1	1	1	forest	60.3775	23.0566	28	1.64838	1.43468	-0.724578	-1.28525	-1.39358	-0.492938	-1.3507	1.57064	-0.540787	-1.6362	1.40039	-0.221065	-0.902297	-0.646581	-1.58805	-0.536782	-0.536575	-0.627392	0.531976	-0.532198	-0.702039	-0.599421	-0.370062	4517	1121	653	1007	659
1	dispar	10453	10453_G_03	10453_G_03_RT_02	garden	10453_3_2	RT	4N	3_apomictic_facultative_sexual	3	1.76533	1	1	1	1	1	1	forest	60.3775	23.0566	28	1.64838	1.43468	-0.724578	-1.28525	-1.39358	-0.492938	-1.3507	1.57064	-0.540787	-1.6362	1.40039	-0.221065	-0.902297	-0.646581	-1.58805	-0.536782	-0.536575	-0.627392	0.531976	-0.532198	-0.702039	-0.599421	-0.370062	4518	1073	687	1004	693
1	dispar	10453	10453_G_03	10453_G_03_SL_01	garden	10453_3_SL_1	SL	4N	3_apomictic_facultative_sexual	3	1.76533	1	1	1	1	1	1	forest	60.3775	23.0566	28	1.64838	1.43468	-0.724578	-1.28525	-1.39358	-0.492938	-1.3507	1.57064	-0.540787	-1.6362	1.40039	-0.221065	-0.902297	-0.646581	-1.58805	-0.536782	-0.536575	-0.627392	0.531976	-0.532198	-0.702039	-0.599421	-0.370062	8337	165	18	156	18
1	dispar	10453	10453_G_03	10453_G_03_SL_02	garden	10453_3_SL_2	SL	4N	3_apomictic_facultative_sexual	3	1.76533	1	1	1	1	1	1	forest	60.3775	23.0566	28	1.64838	1.43468	-0.724578	-1.28525	-1.39358	-0.492938	-1.3507	1.57064	-0.540787	-1.6362	1.40039	-0.221065	-0.902297	-0.646581	-1.58805	-0.536782	-0.536575	-0.627392	0.531976	-0.532198	-0.702039	-0.599421	-0.370062	8338	136	9	126	11
1	dispar	10453	10453_G_04	10453_G_04_BL_02	garden	10453_4_BL_2_garden	BL	4N	3_apomictic_facultative_sexual	3	1.76533	1	1	1	1	1	1	forest	60.3775	23.0566	28	1.64838	1.43468	-0.724578	-1.28525	-1.39358	-0.492938	-1.3507	1.57064	-0.540787	-1.6362	1.40039	-0.221065	-0.902297	-0.646581	-1.58805	-0.536782	-0.536575	-0.627392	0.531976	-0.532198	-0.702039	-0.599421	-0.370062	78	556	356	533	354
1	dispar	10453	10453_G_04	10453_G_04_BL_03	garden	10453_4_BL_3_garden	BL	4N	3_apomictic_facultative_sexual	3	1.76533	1	1	1	1	1	1	forest	60.3775	23.0566	28	1.64838	1.43468	-0.724578	-1.28525	-1.39358	-0.492938	-1.3507	1.57064	-0.540787	-1.6362	1.40039	-0.221065	-0.902297	-0.646581	-1.58805	-0.536782	-0.536575	-0.627392	0.531976	-0.532198	-0.702039	-0.599421	-0.370062	79	493	263	464	263
1	dispar	10453	10453_G_04	10453_G_04_RT_01	garden	10453_4_1	RT	4N	3_apomictic_facultative_sexual	3	1.76533	1	1	1	1	1	1	forest	60.3775	23.0566	28	1.64838	1.43468	-0.724578	-1.28525	-1.39358	-0.492938	-1.3507	1.57064	-0.540787	-1.6362	1.40039	-0.221065	-0.902297	-0.646581	-1.58805	-0.536782	-0.536575	-0.627392	0.531976	-0.532198	-0.702039	-0.599421	-0.370062	4519	1201	513	1027	542
1	dispar	10453	10453_G_04	10453_G_04_RT_02	garden	10453_4_2	RT	4N	3_apomictic_facultative_sexual	3	1.76533	1	1	1	1	1	1	forest	60.3775	23.0566	28	1.64838	1.43468	-0.724578	-1.28525	-1.39358	-0.492938	-1.3507	1.57064	-0.540787	-1.6362	1.40039	-0.221065	-0.902297	-0.646581	-1.58805	-0.536782	-0.536575	-0.627392	0.531976	-0.532198	-0.702039	-0.599421	-0.370062	4520	927	676	827	630
1	dispar	10453	10453_G_04	10453_G_04_SL_01	garden	10453_4_SL_1	SL	4N	3_apomictic_facultative_sexual	3	1.76533	1	1	1	1	1	1	forest	60.3775	23.0566	28	1.64838	1.43468	-0.724578	-1.28525	-1.39358	-0.492938	-1.3507	1.57064	-0.540787	-1.6362	1.40039	-0.221065	-0.902297	-0.646581	-1.58805	-0.536782	-0.536575	-0.627392	0.531976	-0.532198	-0.702039	-0.599421	-0.370062	8339	109	16	96	17
1	dispar	10453	10453_G_04	10453_G_04_SL_02	garden	10453_4_SL_2	SL	4N	3_apomictic_facultative_sexual	3	1.76533	1	1	1	1	1	1	forest	60.3775	23.0566	28	1.64838	1.43468	-0.724578	-1.28525	-1.39358	-0.492938	-1.3507	1.57064	-0.540787	-1.6362	1.40039	-0.221065	-0.902297	-0.646581	-1.58805	-0.536782	-0.536575	-0.627392	0.531976	-0.532198	-0.702039	-0.599421	-0.370062	8340	190	34	180	33
1	dispar	10453	10453_G_04	10453_G_04_SL_03	garden	10453_4_SL_3	SL	4N	3_apomictic_facultative_sexual	3	1.76533	1	1	1	1	1	1	forest	60.3775	23.0566	28	1.64838	1.43468	-0.724578	-1.28525	-1.39358	-0.492938	-1.3507	1.57064	-0.540787	-1.6362	1.40039	-0.221065	-0.902297	-0.646581	-1.58805	-0.536782	-0.536575	-0.627392	0.531976	-0.532198	-0.702039	-0.599421	-0.370062	8341	147	27	129	33
1	dispar	10453	10453_G_05	10453_G_05_BL_01	garden	10453_5_BL_1_garden	BL	4N	3_apomictic_facultative_sexual	3	1.76533	1	1	1	1	1	1	forest	60.3775	23.0566	28	1.64838	1.43468	-0.724578	-1.28525	-1.39358	-0.492938	-1.3507	1.57064	-0.540787	-1.6362	1.40039	-0.221065	-0.902297	-0.646581	-1.58805	-0.536782	-0.536575	-0.627392	0.531976	-0.532198	-0.702039	-0.599421	-0.370062	80	554	332	527	332
1	dispar	10453	10453_G_05	10453_G_05_BL_02	garden	10453_5_BL_2_garden	BL	4N	3_apomictic_facultative_sexual	3	1.76533	1	1	1	1	1	1	forest	60.3775	23.0566	28	1.64838	1.43468	-0.724578	-1.28525	-1.39358	-0.492938	-1.3507	1.57064	-0.540787	-1.6362	1.40039	-0.221065	-0.902297	-0.646581	-1.58805	-0.536782	-0.536575	-0.627392	0.531976	-0.532198	-0.702039	-0.599421	-0.370062	81	517	351	493	345
1	dispar	10453	10453_G_05	10453_G_05_BL_03	garden	10453_5_BL_3_garden	BL	4N	3_apomictic_facultative_sexual	3	1.76533	1	1	1	1	1	1	forest	60.3775	23.0566	28	1.64838	1.43468	-0.724578	-1.28525	-1.39358	-0.492938	-1.3507	1.57064	-0.540787	-1.6362	1.40039	-0.221065	-0.902297	-0.646581	-1.58805	-0.536782	-0.536575	-0.627392	0.531976	-0.532198	-0.702039	-0.599421	-0.370062	82	383	242	349	245
1	dispar	10453	10453_G_05	10453_G_05_RT_01	garden	10453_5_1	RT	4N	3_apomictic_facultative_sexual	3	1.76533	1	1	1	1	1	1	forest	60.3775	23.0566	28	1.64838	1.43468	-0.724578	-1.28525	-1.39358	-0.492938	-1.3507	1.57064	-0.540787	-1.6362	1.40039	-0.221065	-0.902297	-0.646581	-1.58805	-0.536782	-0.536575	-0.627392	0.531976	-0.532198	-0.702039	-0.599421	-0.370062	4521	1161	322	1021	302
1	dispar	10453	10453_G_05	10453_G_05_RT_02	garden	10453_5_2	RT	4N	3_apomictic_facultative_sexual	3	1.76533	1	1	1	1	1	1	forest	60.3775	23.0566	28	1.64838	1.43468	-0.724578	-1.28525	-1.39358	-0.492938	-1.3507	1.57064	-0.540787	-1.6362	1.40039	-0.221065	-0.902297	-0.646581	-1.58805	-0.536782	-0.536575	-0.627392	0.531976	-0.532198	-0.702039	-0.599421	-0.370062	4522	1270	650	1144	622
1	dispar	10453	10453_G_05	10453_G_05_SL_02	garden	10453_5_SL_2	SL	4N	3_apomictic_facultative_sexual	3	1.76533	1	1	1	1	1	1	forest	60.3775	23.0566	28	1.64838	1.43468	-0.724578	-1.28525	-1.39358	-0.492938	-1.3507	1.57064	-0.540787	-1.6362	1.40039	-0.221065	-0.902297	-0.646581	-1.58805	-0.536782	-0.536575	-0.627392	0.531976	-0.532198	-0.702039	-0.599421	-0.370062	8342	325	34	312	25
1	dispar	10453	10453_G_05	10453_G_05_SL_03	garden	10453_5_SL_3	SL	4N	3_apomictic_facultative_sexual	3	1.76533	1	1	1	1	1	1	forest	60.3775	23.0566	28	1.64838	1.43468	-0.724578	-1.28525	-1.39358	-0.492938	-1.3507	1.57064	-0.540787	-1.6362	1.40039	-0.221065	-0.902297	-0.646581	-1.58805	-0.536782	-0.536575	-0.627392	0.531976	-0.532198	-0.702039	-0.599421	-0.370062	8343	155	19	146	18
1	dispar	10453	10453_G_06	10453_G_06_BL_03	garden	10453_6_BL_3_garden	BL	4N	3_apomictic_facultative_sexual	3	1.76533	1	1	1	1	1	1	forest	60.3775	23.0566	28	1.64838	1.43468	-0.724578	-1.28525	-1.39358	-0.492938	-1.3507	1.57064	-0.540787	-1.6362	1.40039	-0.221065	-0.902297	-0.646581	-1.58805	-0.536782	-0.536575	-0.627392	0.531976	-0.532198	-0.702039	-0.599421	-0.370062	83	526	226	499	205
1	dispar	10453	10453_G_06	10453_G_06_RT_01	garden	10453_6_1	RT	4N	3_apomictic_facultative_sexual	3	1.76533	1	1	1	1	1	1	forest	60.3775	23.0566	28	1.64838	1.43468	-0.724578	-1.28525	-1.39358	-0.492938	-1.3507	1.57064	-0.540787	-1.6362	1.40039	-0.221065	-0.902297	-0.646581	-1.58805	-0.536782	-0.536575	-0.627392	0.531976	-0.532198	-0.702039	-0.599421	-0.370062	4523	1039	496	884	419
1	dispar	10453	10453_G_06	10453_G_06_RT_02	garden	10453_6_2	RT	4N	3_apomictic_facultative_sexual	3	1.76533	1	1	1	1	1	1	forest	60.3775	23.0566	28	1.64838	1.43468	-0.724578	-1.28525	-1.39358	-0.492938	-1.3507	1.57064	-0.540787	-1.6362	1.40039	-0.221065	-0.902297	-0.646581	-1.58805	-0.536782	-0.536575	-0.627392	0.531976	-0.532198	-0.702039	-0.599421	-0.370062	4524	1598	513	1489	379
1	dispar	10453	10453_G_06	10453_G_06_SL_01	garden	10453_6_SL_1	SL	4N	3_apomictic_facultative_sexual	3	1.76533	1	1	1	1	1	1	forest	60.3775	23.0566	28	1.64838	1.43468	-0.724578	-1.28525	-1.39358	-0.492938	-1.3507	1.57064	-0.540787	-1.6362	1.40039	-0.221065	-0.902297	-0.646581	-1.58805	-0.536782	-0.536575	-0.627392	0.531976	-0.532198	-0.702039	-0.599421	-0.370062	8344	272	26	264	24
1	dispar	10453	10453_G_06	10453_G_06_SL_03	garden	10453_6_SL_3	SL	4N	3_apomictic_facultative_sexual	3	1.76533	1	1	1	1	1	1	forest	60.3775	23.0566	28	1.64838	1.43468	-0.724578	-1.28525	-1.39358	-0.492938	-1.3507	1.57064	-0.540787	-1.6362	1.40039	-0.221065	-0.902297	-0.646581	-1.58805	-0.536782	-0.536575	-0.627392	0.531976	-0.532198	-0.702039	-0.599421	-0.370062	8345	205	11	190	6
1	dispar	10453	10453_H_08	10453_H_08_BL_01	herbar	10453_8_BL_herbar	BL	4N	3_apomictic_facultative_sexual	3	1.76533	1	1	1	1	1	1	forest	60.3775	23.0566	28	1.64838	1.43468	-0.724578	-1.28525	-1.39358	-0.492938	-1.3507	1.57064	-0.540787	-1.6362	1.40039	-0.221065	-0.902297	-0.646581	-1.58805	-0.536782	-0.536575	-0.627392	0.531976	-0.532198	-0.702039	-0.599421	-0.370062	84	850	663	827	676
1	dispar	10453	10453_H_08	10453_H_08_RT_01	herbar	10453_8_herbar	RT	4N	3_apomictic_facultative_sexual	3	1.76533	1	1	1	1	1	1	forest	60.3775	23.0566	28	1.64838	1.43468	-0.724578	-1.28525	-1.39358	-0.492938	-1.3507	1.57064	-0.540787	-1.6362	1.40039	-0.221065	-0.902297	-0.646581	-1.58805	-0.536782	-0.536575	-0.627392	0.531976	-0.532198	-0.702039	-0.599421	-0.370062	4525	609	1164	548	1153
1	dispar	10453	10453_H_08	10453_H_08_SL_01	herbar	10453_8_SL_herbar	SL	4N	3_apomictic_facultative_sexual	3	1.76533	1	1	1	1	1	1	forest	60.3775	23.0566	28	1.64838	1.43468	-0.724578	-1.28525	-1.39358	-0.492938	-1.3507	1.57064	-0.540787	-1.6362	1.40039	-0.221065	-0.902297	-0.646581	-1.58805	-0.536782	-0.536575	-0.627392	0.531976	-0.532198	-0.702039	-0.599421	-0.370062	8346	1079	748	1075	743
1	dispar	10453	10453_H_09	10453_H_09_BL_01	herbar	10453_9_BL_herbar	BL	4N	3_apomictic_facultative_sexual	3	1.76533	1	1	1	1	1	1	forest	60.3775	23.0566	28	1.64838	1.43468	-0.724578	-1.28525	-1.39358	-0.492938	-1.3507	1.57064	-0.540787	-1.6362	1.40039	-0.221065	-0.902297	-0.646581	-1.58805	-0.536782	-0.536575	-0.627392	0.531976	-0.532198	-0.702039	-0.599421	-0.370062	85	936	865	903	855
1	dispar	10453	10453_H_09	10453_H_09_RT_01	herbar	10453_9_herbar	RT	4N	3_apomictic_facultative_sexual	3	1.76533	1	1	1	1	1	1	forest	60.3775	23.0566	28	1.64838	1.43468	-0.724578	-1.28525	-1.39358	-0.492938	-1.3507	1.57064	-0.540787	-1.6362	1.40039	-0.221065	-0.902297	-0.646581	-1.58805	-0.536782	-0.536575	-0.627392	0.531976	-0.532198	-0.702039	-0.599421	-0.370062	4526	745	1059	614	1029
1	dispar	10453	10453_H_09	10453_H_09_SL_01	herbar	10453_9_SL_herbar	SL	4N	3_apomictic_facultative_sexual	3	1.76533	1	1	1	1	1	1	forest	60.3775	23.0566	28	1.64838	1.43468	-0.724578	-1.28525	-1.39358	-0.492938	-1.3507	1.57064	-0.540787	-1.6362	1.40039	-0.221065	-0.902297	-0.646581	-1.58805	-0.536782	-0.536575	-0.627392	0.531976	-0.532198	-0.702039	-0.599421	-0.370062	8347	965	1090	950	1096
1	elatior	10371	10371_G_01	10371_G_01_BL_01	garden	10371_01_BL_1_garden	BL	4N	2_apomictic_obligate_asexual	3	0.639956	1	1	1	NA	NA	NA	forest	59.5653	17.362	36	1.49631	0.503731	-0.703107	-0.9236	-0.801719	-1.04818	-1.3507	0.782789	-0.540787	-0.678229	0.315023	-0.00893437	-0.490755	-0.352787	-0.823211	-0.85024	-0.79021	-0.982706	0.531976	-0.759972	-0.949496	-0.71034	-0.699005	1	889	573	829	625
1	elatior	10371	10371_G_01	10371_G_01_BL_02	garden	10371_01_BL_2_garden	BL	4N	2_apomictic_obligate_asexual	3	0.639956	1	1	1	NA	NA	NA	forest	59.5653	17.362	36	1.49631	0.503731	-0.703107	-0.9236	-0.801719	-1.04818	-1.3507	0.782789	-0.540787	-0.678229	0.315023	-0.00893437	-0.490755	-0.352787	-0.823211	-0.85024	-0.79021	-0.982706	0.531976	-0.759972	-0.949496	-0.71034	-0.699005	2	507	335	475	331
1	elatior	10371	10371_G_01	10371_G_01_BL_03	garden	10371_01_BL_3_garden	BL	4N	2_apomictic_obligate_asexual	3	0.639956	1	1	1	NA	NA	NA	forest	59.5653	17.362	36	1.49631	0.503731	-0.703107	-0.9236	-0.801719	-1.04818	-1.3507	0.782789	-0.540787	-0.678229	0.315023	-0.00893437	-0.490755	-0.352787	-0.823211	-0.85024	-0.79021	-0.982706	0.531976	-0.759972	-0.949496	-0.71034	-0.699005	3	520	290	480	297
1	elatior	10371	10371_G_01	10371_G_01_RT_01	garden	10371_1_1	RT	4N	2_apomictic_obligate_asexual	3	0.639956	1	1	1	NA	NA	NA	forest	59.5653	17.362	36	1.49631	0.503731	-0.703107	-0.9236	-0.801719	-1.04818	-1.3507	0.782789	-0.540787	-0.678229	0.315023	-0.00893437	-0.490755	-0.352787	-0.823211	-0.85024	-0.79021	-0.982706	0.531976	-0.759972	-0.949496	-0.71034	-0.699005	4459	1120	426	985	423
1	elatior	10371	10371_G_01	10371_G_01_RT_02	garden	10371_1_2	RT	4N	2_apomictic_obligate_asexual	3	0.639956	1	1	1	NA	NA	NA	forest	59.5653	17.362	36	1.49631	0.503731	-0.703107	-0.9236	-0.801719	-1.04818	-1.3507	0.782789	-0.540787	-0.678229	0.315023	-0.00893437	-0.490755	-0.352787	-0.823211	-0.85024	-0.79021	-0.982706	0.531976	-0.759972	-0.949496	-0.71034	-0.699005	4460	1243	417	1114	423
1	elatior	10371	10371_G_02	10371_G_02_BL_01	garden	10371_02_BL_1_garden	BL	4N	2_apomictic_obligate_asexual	3	0.639956	1	1	1	NA	NA	NA	forest	59.5653	17.362	36	1.49631	0.503731	-0.703107	-0.9236	-0.801719	-1.04818	-1.3507	0.782789	-0.540787	-0.678229	0.315023	-0.00893437	-0.490755	-0.352787	-0.823211	-0.85024	-0.79021	-0.982706	0.531976	-0.759972	-0.949496	-0.71034	-0.699005	4	482	455	457	447
1	elatior	10371	10371_G_02	10371_G_02_BL_02	garden	10371_02_BL_2_garden	BL	4N	2_apomictic_obligate_asexual	3	0.639956	1	1	1	NA	NA	NA	forest	59.5653	17.362	36	1.49631	0.503731	-0.703107	-0.9236	-0.801719	-1.04818	-1.3507	0.782789	-0.540787	-0.678229	0.315023	-0.00893437	-0.490755	-0.352787	-0.823211	-0.85024	-0.79021	-0.982706	0.531976	-0.759972	-0.949496	-0.71034	-0.699005	5	480	325	438	327
1	elatior	10371	10371_G_02	10371_G_02_BL_03	garden	10371_02_BL_3_garden	BL	4N	2_apomictic_obligate_asexual	3	0.639956	1	1	1	NA	NA	NA	forest	59.5653	17.362	36	1.49631	0.503731	-0.703107	-0.9236	-0.801719	-1.04818	-1.3507	0.782789	-0.540787	-0.678229	0.315023	-0.00893437	-0.490755	-0.352787	-0.823211	-0.85024	-0.79021	-0.982706	0.531976	-0.759972	-0.949496	-0.71034	-0.699005	6	449	408	413	404
1	elatior	10371	10371_G_02	10371_G_02_SL_01	garden	10371_02_SL_1	SL	4N	2_apomictic_obligate_asexual	3	0.639956	1	1	1	NA	NA	NA	forest	59.5653	17.362	36	1.49631	0.503731	-0.703107	-0.9236	-0.801719	-1.04818	-1.3507	0.782789	-0.540787	-0.678229	0.315023	-0.00893437	-0.490755	-0.352787	-0.823211	-0.85024	-0.79021	-0.982706	0.531976	-0.759972	-0.949496	-0.71034	-0.699005	8283	175	63	167	66
1	elatior	10371	10371_G_02	10371_G_02_SL_02	garden	10371_02_SL_2	SL	4N	2_apomictic_obligate_asexual	3	0.639956	1	1	1	NA	NA	NA	forest	59.5653	17.362	36	1.49631	0.503731	-0.703107	-0.9236	-0.801719	-1.04818	-1.3507	0.782789	-0.540787	-0.678229	0.315023	-0.00893437	-0.490755	-0.352787	-0.823211	-0.85024	-0.79021	-0.982706	0.531976	-0.759972	-0.949496	-0.71034	-0.699005	8284	198	21	190	18
1	elatior	10371	10371_G_03	10371_G_03_BL_01	garden	10371_3_BL_1_garden	BL	4N	2_apomictic_obligate_asexual	3	0.639956	1	1	1	NA	NA	NA	forest	59.5653	17.362	36	1.49631	0.503731	-0.703107	-0.9236	-0.801719	-1.04818	-1.3507	0.782789	-0.540787	-0.678229	0.315023	-0.00893437	-0.490755	-0.352787	-0.823211	-0.85024	-0.79021	-0.982706	0.531976	-0.759972	-0.949496	-0.71034	-0.699005	7	496	330	454	332
1	elatior	10371	10371_G_03	10371_G_03_BL_02	garden	10371_3_BL_2_garden	BL	4N	2_apomictic_obligate_asexual	3	0.639956	1	1	1	NA	NA	NA	forest	59.5653	17.362	36	1.49631	0.503731	-0.703107	-0.9236	-0.801719	-1.04818	-1.3507	0.782789	-0.540787	-0.678229	0.315023	-0.00893437	-0.490755	-0.352787	-0.823211	-0.85024	-0.79021	-0.982706	0.531976	-0.759972	-0.949496	-0.71034	-0.699005	8	611	260	556	305
1	elatior	10371	10371_G_03	10371_G_03_RT_01	garden	10371_3_1_garden	RT	4N	2_apomictic_obligate_asexual	3	0.639956	1	1	1	NA	NA	NA	forest	59.5653	17.362	36	1.49631	0.503731	-0.703107	-0.9236	-0.801719	-1.04818	-1.3507	0.782789	-0.540787	-0.678229	0.315023	-0.00893437	-0.490755	-0.352787	-0.823211	-0.85024	-0.79021	-0.982706	0.531976	-0.759972	-0.949496	-0.71034	-0.699005	4461	1074	563	923	535
1	elatior	10371	10371_G_03	10371_G_03_RT_02	garden	10371_3_2_garden	RT	4N	2_apomictic_obligate_asexual	3	0.639956	1	1	1	NA	NA	NA	forest	59.5653	17.362	36	1.49631	0.503731	-0.703107	-0.9236	-0.801719	-1.04818	-1.3507	0.782789	-0.540787	-0.678229	0.315023	-0.00893437	-0.490755	-0.352787	-0.823211	-0.85024	-0.79021	-0.982706	0.531976	-0.759972	-0.949496	-0.71034	-0.699005	4462	1108	327	960	333
1	elatior	10371	10371_G_03	10371_G_03_SL_01	garden	10371_3_SL_1	SL	4N	2_apomictic_obligate_asexual	3	0.639956	1	1	1	NA	NA	NA	forest	59.5653	17.362	36	1.49631	0.503731	-0.703107	-0.9236	-0.801719	-1.04818	-1.3507	0.782789	-0.540787	-0.678229	0.315023	-0.00893437	-0.490755	-0.352787	-0.823211	-0.85024	-0.79021	-0.982706	0.531976	-0.759972	-0.949496	-0.71034	-0.699005	8285	273	28	257	30
1	elatior	10371	10371_G_04	10371_G_04_BL_01	garden	10371_4_BL_1_garden	BL	4N	2_apomictic_obligate_asexual	3	0.639956	1	1	1	NA	NA	NA	forest	59.5653	17.362	36	1.49631	0.503731	-0.703107	-0.9236	-0.801719	-1.04818	-1.3507	0.782789	-0.540787	-0.678229	0.315023	-0.00893437	-0.490755	-0.352787	-0.823211	-0.85024	-0.79021	-0.982706	0.531976	-0.759972	-0.949496	-0.71034	-0.699005	9	686	449	623	447
1	elatior	10371	10371_G_04	10371_G_04_BL_02	garden	10371_4_BL_2_garden	BL	4N	2_apomictic_obligate_asexual	3	0.639956	1	1	1	NA	NA	NA	forest	59.5653	17.362	36	1.49631	0.503731	-0.703107	-0.9236	-0.801719	-1.04818	-1.3507	0.782789	-0.540787	-0.678229	0.315023	-0.00893437	-0.490755	-0.352787	-0.823211	-0.85024	-0.79021	-0.982706	0.531976	-0.759972	-0.949496	-0.71034	-0.699005	10	785	523	710	534
1	elatior	10371	10371_G_04	10371_G_04_RT_01	garden	10371_4_1	RT	4N	2_apomictic_obligate_asexual	3	0.639956	1	1	1	NA	NA	NA	forest	59.5653	17.362	36	1.49631	0.503731	-0.703107	-0.9236	-0.801719	-1.04818	-1.3507	0.782789	-0.540787	-0.678229	0.315023	-0.00893437	-0.490755	-0.352787	-0.823211	-0.85024	-0.79021	-0.982706	0.531976	-0.759972	-0.949496	-0.71034	-0.699005	4463	1080	489	970	436
1	elatior	10371	10371_G_04	10371_G_04_RT_02	garden	10371_4_2	RT	4N	2_apomictic_obligate_asexual	3	0.639956	1	1	1	NA	NA	NA	forest	59.5653	17.362	36	1.49631	0.503731	-0.703107	-0.9236	-0.801719	-1.04818	-1.3507	0.782789	-0.540787	-0.678229	0.315023	-0.00893437	-0.490755	-0.352787	-0.823211	-0.85024	-0.79021	-0.982706	0.531976	-0.759972	-0.949496	-0.71034	-0.699005	4464	1296	479	1130	454
1	elatior	10371	10371_G_04	10371_G_04_SL_01	garden	10371_4_SL_1	SL	4N	2_apomictic_obligate_asexual	3	0.639956	1	1	1	NA	NA	NA	forest	59.5653	17.362	36	1.49631	0.503731	-0.703107	-0.9236	-0.801719	-1.04818	-1.3507	0.782789	-0.540787	-0.678229	0.315023	-0.00893437	-0.490755	-0.352787	-0.823211	-0.85024	-0.79021	-0.982706	0.531976	-0.759972	-0.949496	-0.71034	-0.699005	8286	361	31	342	26
1	elatior	10371	10371_G_04	10371_G_04_SL_02	garden	10371_4_SL_2	SL	4N	2_apomictic_obligate_asexual	3	0.639956	1	1	1	NA	NA	NA	forest	59.5653	17.362	36	1.49631	0.503731	-0.703107	-0.9236	-0.801719	-1.04818	-1.3507	0.782789	-0.540787	-0.678229	0.315023	-0.00893437	-0.490755	-0.352787	-0.823211	-0.85024	-0.79021	-0.982706	0.531976	-0.759972	-0.949496	-0.71034	-0.699005	8287	212	35	195	36
1	elatior	10371	10371_G_05	10371_G_05_BL_02	garden	10371_5_BL_2_garden	BL	4N	2_apomictic_obligate_asexual	3	0.639956	1	1	1	NA	NA	NA	forest	59.5653	17.362	36	1.49631	0.503731	-0.703107	-0.9236	-0.801719	-1.04818	-1.3507	0.782789	-0.540787	-0.678229	0.315023	-0.00893437	-0.490755	-0.352787	-0.823211	-0.85024	-0.79021	-0.982706	0.531976	-0.759972	-0.949496	-0.71034	-0.699005	11	586	404	541	397
1	elatior	10371	10371_G_05	10371_G_05_RT_01	garden	10371_5_1	RT	4N	2_apomictic_obligate_asexual	3	0.639956	1	1	1	NA	NA	NA	forest	59.5653	17.362	36	1.49631	0.503731	-0.703107	-0.9236	-0.801719	-1.04818	-1.3507	0.782789	-0.540787	-0.678229	0.315023	-0.00893437	-0.490755	-0.352787	-0.823211	-0.85024	-0.79021	-0.982706	0.531976	-0.759972	-0.949496	-0.71034	-0.699005	4465	1255	338	1098	313
1	elatior	10371	10371_G_05	10371_G_05_RT_02	garden	10371_5_2	RT	4N	2_apomictic_obligate_asexual	3	0.639956	1	1	1	NA	NA	NA	forest	59.5653	17.362	36	1.49631	0.503731	-0.703107	-0.9236	-0.801719	-1.04818	-1.3507	0.782789	-0.540787	-0.678229	0.315023	-0.00893437	-0.490755	-0.352787	-0.823211	-0.85024	-0.79021	-0.982706	0.531976	-0.759972	-0.949496	-0.71034	-0.699005	4466	1193	329	1076	326
1	elatior	10371	10371_G_06	10371_G_06_RT_01	garden	10371_6_1	RT	4N	2_apomictic_obligate_asexual	3	0.639956	1	1	1	NA	NA	NA	forest	59.5653	17.362	36	1.49631	0.503731	-0.703107	-0.9236	-0.801719	-1.04818	-1.3507	0.782789	-0.540787	-0.678229	0.315023	-0.00893437	-0.490755	-0.352787	-0.823211	-0.85024	-0.79021	-0.982706	0.531976	-0.759972	-0.949496	-0.71034	-0.699005	4467	2065	335	1996	178
1	elatior	10371	10371_G_06	10371_G_06_RT_02	garden	10371_6_2	RT	4N	2_apomictic_obligate_asexual	3	0.639956	1	1	1	NA	NA	NA	forest	59.5653	17.362	36	1.49631	0.503731	-0.703107	-0.9236	-0.801719	-1.04818	-1.3507	0.782789	-0.540787	-0.678229	0.315023	-0.00893437	-0.490755	-0.352787	-0.823211	-0.85024	-0.79021	-0.982706	0.531976	-0.759972	-0.949496	-0.71034	-0.699005	4468	1682	238	1563	216
1	elatior	10371	10371_G_07	10371_G_07_RT_01	garden	10371_7_1	RT	4N	2_apomictic_obligate_asexual	3	0.639956	1	1	1	NA	NA	NA	forest	59.5653	17.362	36	1.49631	0.503731	-0.703107	-0.9236	-0.801719	-1.04818	-1.3507	0.782789	-0.540787	-0.678229	0.315023	-0.00893437	-0.490755	-0.352787	-0.823211	-0.85024	-0.79021	-0.982706	0.531976	-0.759972	-0.949496	-0.71034	-0.699005	4469	1635	272	1541	106
1	elatior	10371	10371_G_07	10371_G_07_RT_02	garden	10371_7_2	RT	4N	2_apomictic_obligate_asexual	3	0.639956	1	1	1	NA	NA	NA	forest	59.5653	17.362	36	1.49631	0.503731	-0.703107	-0.9236	-0.801719	-1.04818	-1.3507	0.782789	-0.540787	-0.678229	0.315023	-0.00893437	-0.490755	-0.352787	-0.823211	-0.85024	-0.79021	-0.982706	0.531976	-0.759972	-0.949496	-0.71034	-0.699005	4470	1211	370	1102	363
1	elatior	10371	10371_G_07	10371_G_07_SL_02	garden	10371_7_SL_2	SL	4N	2_apomictic_obligate_asexual	3	0.639956	1	1	1	NA	NA	NA	forest	59.5653	17.362	36	1.49631	0.503731	-0.703107	-0.9236	-0.801719	-1.04818	-1.3507	0.782789	-0.540787	-0.678229	0.315023	-0.00893437	-0.490755	-0.352787	-0.823211	-0.85024	-0.79021	-0.982706	0.531976	-0.759972	-0.949496	-0.71034	-0.699005	8288	186	22	158	21
1	elatior	10371	10371_H_07	10371_H_07_BL_01	herbar	10371_7_BL_herbar	BL	4N	2_apomictic_obligate_asexual	3	0.639956	1	1	1	NA	NA	NA	forest	59.5653	17.362	36	1.49631	0.503731	-0.703107	-0.9236	-0.801719	-1.04818	-1.3507	0.782789	-0.540787	-0.678229	0.315023	-0.00893437	-0.490755	-0.352787	-0.823211	-0.85024	-0.79021	-0.982706	0.531976	-0.759972	-0.949496	-0.71034	-0.699005	12	1022	960	952	955
1	elatior	10371	10371_H_07	10371_H_07_RT_01	herbar	10371_7_herbar	RT	4N	2_apomictic_obligate_asexual	3	0.639956	1	1	1	NA	NA	NA	forest	59.5653	17.362	36	1.49631	0.503731	-0.703107	-0.9236	-0.801719	-1.04818	-1.3507	0.782789	-0.540787	-0.678229	0.315023	-0.00893437	-0.490755	-0.352787	-0.823211	-0.85024	-0.79021	-0.982706	0.531976	-0.759972	-0.949496	-0.71034	-0.699005	4471	1251	1214	1218	1073
1	elatior	10371	10371_H_07	10371_H_07_SL_01	herbar	10371_7_SL_herbar	SL	4N	2_apomictic_obligate_asexual	3	0.639956	1	1	1	NA	NA	NA	forest	59.5653	17.362	36	1.49631	0.503731	-0.703107	-0.9236	-0.801719	-1.04818	-1.3507	0.782789	-0.540787	-0.678229	0.315023	-0.00893437	-0.490755	-0.352787	-0.823211	-0.85024	-0.79021	-0.982706	0.531976	-0.759972	-0.949496	-0.71034	-0.699005	8289	1008	582	1003	582
1	elatior	10371	10371_H_08	10371_H_08_BL_01	herbar	10371_8_BL_herbar	BL	4N	2_apomictic_obligate_asexual	3	0.639956	1	1	1	NA	NA	NA	forest	59.5653	17.362	36	1.49631	0.503731	-0.703107	-0.9236	-0.801719	-1.04818	-1.3507	0.782789	-0.540787	-0.678229	0.315023	-0.00893437	-0.490755	-0.352787	-0.823211	-0.85024	-0.79021	-0.982706	0.531976	-0.759972	-0.949496	-0.71034	-0.699005	13	643	588	608	588
1	elatior	10371	10371_H_08	10371_H_08_RT_01	herbar	10371_8_herbar	RT	4N	2_apomictic_obligate_asexual	3	0.639956	1	1	1	NA	NA	NA	forest	59.5653	17.362	36	1.49631	0.503731	-0.703107	-0.9236	-0.801719	-1.04818	-1.3507	0.782789	-0.540787	-0.678229	0.315023	-0.00893437	-0.490755	-0.352787	-0.823211	-0.85024	-0.79021	-0.982706	0.531976	-0.759972	-0.949496	-0.71034	-0.699005	4472	560	1065	482	1057
1	elatior	10371	10371_H_08	10371_H_08_SL_01	herbar	10371_8_SL_herbar	SL	4N	2_apomictic_obligate_asexual	3	0.639956	1	1	1	NA	NA	NA	forest	59.5653	17.362	36	1.49631	0.503731	-0.703107	-0.9236	-0.801719	-1.04818	-1.3507	0.782789	-0.540787	-0.678229	0.315023	-0.00893437	-0.490755	-0.352787	-0.823211	-0.85024	-0.79021	-0.982706	0.531976	-0.759972	-0.949496	-0.71034	-0.699005	8290	479	189	473	185
1	elatior	10371	10371_H_09	10371_H_09_BL_01	herbar	10371_9_BL_herbar	BL	4N	2_apomictic_obligate_asexual	3	0.639956	1	1	1	NA	NA	NA	forest	59.5653	17.362	36	1.49631	0.503731	-0.703107	-0.9236	-0.801719	-1.04818	-1.3507	0.782789	-0.540787	-0.678229	0.315023	-0.00893437	-0.490755	-0.352787	-0.823211	-0.85024	-0.79021	-0.982706	0.531976	-0.759972	-0.949496	-0.71034	-0.699005	14	627	480	581	479
1	elatior	10371	10371_H_09	10371_H_09_RT_01	herbar	10371_9_herbar	RT	4N	2_apomictic_obligate_asexual	3	0.639956	1	1	1	NA	NA	NA	forest	59.5653	17.362	36	1.49631	0.503731	-0.703107	-0.9236	-0.801719	-1.04818	-1.3507	0.782789	-0.540787	-0.678229	0.315023	-0.00893437	-0.490755	-0.352787	-0.823211	-0.85024	-0.79021	-0.982706	0.531976	-0.759972	-0.949496	-0.71034	-0.699005	4473	592	1162	516	1173
1	elatior	10371	10371_H_09	10371_H_09_SL_01	herbar	10371_9_SL_herbar	SL	4N	2_apomictic_obligate_asexual	3	0.639956	1	1	1	NA	NA	NA	forest	59.5653	17.362	36	1.49631	0.503731	-0.703107	-0.9236	-0.801719	-1.04818	-1.3507	0.782789	-0.540787	-0.678229	0.315023	-0.00893437	-0.490755	-0.352787	-0.823211	-0.85024	-0.79021	-0.982706	0.531976	-0.759972	-0.949496	-0.71034	-0.699005	8291	542	218	537	215
1	elatior	10372	10372_G_01	10372_G_01_BL_01	garden	10372_1_BL_1_garden	BL	4N	3_apomictic_facultative_sexual	0	0.867419	1	1	1	1	1	1	humid_forest	59.8038	17.6047	25	1.54095	0.543403	-0.732629	-0.957051	-1.04833	-1.04818	-1.3507	0.906068	-0.828469	-0.962073	0.39542	-0.160456	-0.619362	-0.646581	-1.06474	-0.815411	-0.705665	-0.911643	0.676956	-0.684047	-0.927	-0.662803	-0.657887	15	475	122	422	126
1	elatior	10372	10372_G_01	10372_G_01_BL_02	garden	10372_1_BL_2_garden	BL	4N	3_apomictic_facultative_sexual	0	0.867419	1	1	1	1	1	1	humid_forest	59.8038	17.6047	25	1.54095	0.543403	-0.732629	-0.957051	-1.04833	-1.04818	-1.3507	0.906068	-0.828469	-0.962073	0.39542	-0.160456	-0.619362	-0.646581	-1.06474	-0.815411	-0.705665	-0.911643	0.676956	-0.684047	-0.927	-0.662803	-0.657887	16	429	218	395	217
1	elatior	10372	10372_G_01	10372_G_01_BL_03	garden	10372_1_BL_3_garden	BL	4N	3_apomictic_facultative_sexual	0	0.867419	1	1	1	1	1	1	humid_forest	59.8038	17.6047	25	1.54095	0.543403	-0.732629	-0.957051	-1.04833	-1.04818	-1.3507	0.906068	-0.828469	-0.962073	0.39542	-0.160456	-0.619362	-0.646581	-1.06474	-0.815411	-0.705665	-0.911643	0.676956	-0.684047	-0.927	-0.662803	-0.657887	17	437	248	393	250
1	elatior	10372	10372_G_01	10372_G_01_SL_01	garden	10372_1_SL_1	SL	4N	3_apomictic_facultative_sexual	0	0.867419	1	1	1	1	1	1	humid_forest	59.8038	17.6047	25	1.54095	0.543403	-0.732629	-0.957051	-1.04833	-1.04818	-1.3507	0.906068	-0.828469	-0.962073	0.39542	-0.160456	-0.619362	-0.646581	-1.06474	-0.815411	-0.705665	-0.911643	0.676956	-0.684047	-0.927	-0.662803	-0.657887	8292	160	30	143	29
1	elatior	10372	10372_G_01	10372_G_01_SL_02	garden	10372_1_SL_2	SL	4N	3_apomictic_facultative_sexual	0	0.867419	1	1	1	1	1	1	humid_forest	59.8038	17.6047	25	1.54095	0.543403	-0.732629	-0.957051	-1.04833	-1.04818	-1.3507	0.906068	-0.828469	-0.962073	0.39542	-0.160456	-0.619362	-0.646581	-1.06474	-0.815411	-0.705665	-0.911643	0.676956	-0.684047	-0.927	-0.662803	-0.657887	8293	189	27	182	25
1	elatior	10372	10372_G_02	10372_G_02_BL_01	garden	10372_2_BL_1_garden	BL	4N	3_apomictic_facultative_sexual	0	0.867419	1	1	1	1	1	1	humid_forest	59.8038	17.6047	25	1.54095	0.543403	-0.732629	-0.957051	-1.04833	-1.04818	-1.3507	0.906068	-0.828469	-0.962073	0.39542	-0.160456	-0.619362	-0.646581	-1.06474	-0.815411	-0.705665	-0.911643	0.676956	-0.684047	-0.927	-0.662803	-0.657887	18	512	253	475	258
1	elatior	10372	10372_G_02	10372_G_02_BL_02	garden	10372_2_BL_2_garden	BL	4N	3_apomictic_facultative_sexual	0	0.867419	1	1	1	1	1	1	humid_forest	59.8038	17.6047	25	1.54095	0.543403	-0.732629	-0.957051	-1.04833	-1.04818	-1.3507	0.906068	-0.828469	-0.962073	0.39542	-0.160456	-0.619362	-0.646581	-1.06474	-0.815411	-0.705665	-0.911643	0.676956	-0.684047	-0.927	-0.662803	-0.657887	19	721	326	666	331
1	elatior	10372	10372_G_02	10372_G_02_BL_03	garden	10372_2_BL_3_garden	BL	4N	3_apomictic_facultative_sexual	0	0.867419	1	1	1	1	1	1	humid_forest	59.8038	17.6047	25	1.54095	0.543403	-0.732629	-0.957051	-1.04833	-1.04818	-1.3507	0.906068	-0.828469	-0.962073	0.39542	-0.160456	-0.619362	-0.646581	-1.06474	-0.815411	-0.705665	-0.911643	0.676956	-0.684047	-0.927	-0.662803	-0.657887	20	439	216	399	216
1	elatior	10372	10372_G_02	10372_G_02_RT_01	garden	10372_2_1	RT	4N	3_apomictic_facultative_sexual	0	0.867419	1	1	1	1	1	1	humid_forest	59.8038	17.6047	25	1.54095	0.543403	-0.732629	-0.957051	-1.04833	-1.04818	-1.3507	0.906068	-0.828469	-0.962073	0.39542	-0.160456	-0.619362	-0.646581	-1.06474	-0.815411	-0.705665	-0.911643	0.676956	-0.684047	-0.927	-0.662803	-0.657887	4474	1428	492	1114	539
1	elatior	10372	10372_G_02	10372_G_02_RT_02	garden	10372_2_2	RT	4N	3_apomictic_facultative_sexual	0	0.867419	1	1	1	1	1	1	humid_forest	59.8038	17.6047	25	1.54095	0.543403	-0.732629	-0.957051	-1.04833	-1.04818	-1.3507	0.906068	-0.828469	-0.962073	0.39542	-0.160456	-0.619362	-0.646581	-1.06474	-0.815411	-0.705665	-0.911643	0.676956	-0.684047	-0.927	-0.662803	-0.657887	4475	1456	404	1328	410
1	elatior	10372	10372_G_02	10372_G_02_SL_01	garden	10372_2_SL_1	SL	4N	3_apomictic_facultative_sexual	0	0.867419	1	1	1	1	1	1	humid_forest	59.8038	17.6047	25	1.54095	0.543403	-0.732629	-0.957051	-1.04833	-1.04818	-1.3507	0.906068	-0.828469	-0.962073	0.39542	-0.160456	-0.619362	-0.646581	-1.06474	-0.815411	-0.705665	-0.911643	0.676956	-0.684047	-0.927	-0.662803	-0.657887	8294	148	31	129	32
1	elatior	10372	10372_G_02	10372_G_02_SL_02	garden	10372_2_SL_2	SL	4N	3_apomictic_facultative_sexual	0	0.867419	1	1	1	1	1	1	humid_forest	59.8038	17.6047	25	1.54095	0.543403	-0.732629	-0.957051	-1.04833	-1.04818	-1.3507	0.906068	-0.828469	-0.962073	0.39542	-0.160456	-0.619362	-0.646581	-1.06474	-0.815411	-0.705665	-0.911643	0.676956	-0.684047	-0.927	-0.662803	-0.657887	8295	152	21	138	22
1	elatior	10372	10372_G_03	10372_G_03_BL_01	garden	10372_3_BL_1_garden	BL	4N	3_apomictic_facultative_sexual	0	0.867419	1	1	1	1	1	1	humid_forest	59.8038	17.6047	25	1.54095	0.543403	-0.732629	-0.957051	-1.04833	-1.04818	-1.3507	0.906068	-0.828469	-0.962073	0.39542	-0.160456	-0.619362	-0.646581	-1.06474	-0.815411	-0.705665	-0.911643	0.676956	-0.684047	-0.927	-0.662803	-0.657887	21	647	384	591	394
1	elatior	10372	10372_G_03	10372_G_03_BL_02	garden	10372_3_BL_2_garden	BL	4N	3_apomictic_facultative_sexual	0	0.867419	1	1	1	1	1	1	humid_forest	59.8038	17.6047	25	1.54095	0.543403	-0.732629	-0.957051	-1.04833	-1.04818	-1.3507	0.906068	-0.828469	-0.962073	0.39542	-0.160456	-0.619362	-0.646581	-1.06474	-0.815411	-0.705665	-0.911643	0.676956	-0.684047	-0.927	-0.662803	-0.657887	22	670	305	609	319
1	elatior	10372	10372_G_03	10372_G_03_BL_03	garden	10372_3_BL_3_garden	BL	4N	3_apomictic_facultative_sexual	0	0.867419	1	1	1	1	1	1	humid_forest	59.8038	17.6047	25	1.54095	0.543403	-0.732629	-0.957051	-1.04833	-1.04818	-1.3507	0.906068	-0.828469	-0.962073	0.39542	-0.160456	-0.619362	-0.646581	-1.06474	-0.815411	-0.705665	-0.911643	0.676956	-0.684047	-0.927	-0.662803	-0.657887	23	562	321	505	321
1	elatior	10372	10372_G_03	10372_G_03_RT_01	garden	10372_3_1	RT	4N	3_apomictic_facultative_sexual	0	0.867419	1	1	1	1	1	1	humid_forest	59.8038	17.6047	25	1.54095	0.543403	-0.732629	-0.957051	-1.04833	-1.04818	-1.3507	0.906068	-0.828469	-0.962073	0.39542	-0.160456	-0.619362	-0.646581	-1.06474	-0.815411	-0.705665	-0.911643	0.676956	-0.684047	-0.927	-0.662803	-0.657887	4476	1067	715	954	702
1	elatior	10372	10372_G_03	10372_G_03_RT_02	garden	10372_3_2	RT	4N	3_apomictic_facultative_sexual	0	0.867419	1	1	1	1	1	1	humid_forest	59.8038	17.6047	25	1.54095	0.543403	-0.732629	-0.957051	-1.04833	-1.04818	-1.3507	0.906068	-0.828469	-0.962073	0.39542	-0.160456	-0.619362	-0.646581	-1.06474	-0.815411	-0.705665	-0.911643	0.676956	-0.684047	-0.927	-0.662803	-0.657887	4477	1754	197	1572	100
1	elatior	10372	10372_G_03	10372_G_03_SL_01	garden	10372_3_SL_1	SL	4N	3_apomictic_facultative_sexual	0	0.867419	1	1	1	1	1	1	humid_forest	59.8038	17.6047	25	1.54095	0.543403	-0.732629	-0.957051	-1.04833	-1.04818	-1.3507	0.906068	-0.828469	-0.962073	0.39542	-0.160456	-0.619362	-0.646581	-1.06474	-0.815411	-0.705665	-0.911643	0.676956	-0.684047	-0.927	-0.662803	-0.657887	8296	152	32	133	31
1	elatior	10372	10372_G_03	10372_G_03_SL_02	garden	10372_3_SL_2	SL	4N	3_apomictic_facultative_sexual	0	0.867419	1	1	1	1	1	1	humid_forest	59.8038	17.6047	25	1.54095	0.543403	-0.732629	-0.957051	-1.04833	-1.04818	-1.3507	0.906068	-0.828469	-0.962073	0.39542	-0.160456	-0.619362	-0.646581	-1.06474	-0.815411	-0.705665	-0.911643	0.676956	-0.684047	-0.927	-0.662803	-0.657887	8297	177	24	163	24
1	elatior	10372	10372_G_03	10372_G_03_SL_03	garden	10372_3_SL_3	SL	4N	3_apomictic_facultative_sexual	0	0.867419	1	1	1	1	1	1	humid_forest	59.8038	17.6047	25	1.54095	0.543403	-0.732629	-0.957051	-1.04833	-1.04818	-1.3507	0.906068	-0.828469	-0.962073	0.39542	-0.160456	-0.619362	-0.646581	-1.06474	-0.815411	-0.705665	-0.911643	0.676956	-0.684047	-0.927	-0.662803	-0.657887	8298	170	24	155	29
1	elatior	10372	10372_G_04	10372_G_04_BL_05	garden	10372_4_BL_5_garden	BL	4N	3_apomictic_facultative_sexual	0	0.867419	1	1	1	1	1	1	humid_forest	59.8038	17.6047	25	1.54095	0.543403	-0.732629	-0.957051	-1.04833	-1.04818	-1.3507	0.906068	-0.828469	-0.962073	0.39542	-0.160456	-0.619362	-0.646581	-1.06474	-0.815411	-0.705665	-0.911643	0.676956	-0.684047	-0.927	-0.662803	-0.657887	24	761	354	703	352
1	elatior	10372	10372_G_04	10372_G_04_RT_01	garden	10372_4_1	RT	4N	3_apomictic_facultative_sexual	0	0.867419	1	1	1	1	1	1	humid_forest	59.8038	17.6047	25	1.54095	0.543403	-0.732629	-0.957051	-1.04833	-1.04818	-1.3507	0.906068	-0.828469	-0.962073	0.39542	-0.160456	-0.619362	-0.646581	-1.06474	-0.815411	-0.705665	-0.911643	0.676956	-0.684047	-0.927	-0.662803	-0.657887	4478	1368	486	1205	476
1	elatior	10372	10372_G_04	10372_G_04_RT_02	garden	10372_4_2	RT	4N	3_apomictic_facultative_sexual	0	0.867419	1	1	1	1	1	1	humid_forest	59.8038	17.6047	25	1.54095	0.543403	-0.732629	-0.957051	-1.04833	-1.04818	-1.3507	0.906068	-0.828469	-0.962073	0.39542	-0.160456	-0.619362	-0.646581	-1.06474	-0.815411	-0.705665	-0.911643	0.676956	-0.684047	-0.927	-0.662803	-0.657887	4479	1224	451	1076	492
1	elatior	10372	10372_G_05	10372_G_05_BL_01	garden	10372_5_BL_1_garden	BL	4N	3_apomictic_facultative_sexual	0	0.867419	1	1	1	1	1	1	humid_forest	59.8038	17.6047	25	1.54095	0.543403	-0.732629	-0.957051	-1.04833	-1.04818	-1.3507	0.906068	-0.828469	-0.962073	0.39542	-0.160456	-0.619362	-0.646581	-1.06474	-0.815411	-0.705665	-0.911643	0.676956	-0.684047	-0.927	-0.662803	-0.657887	25	546	283	505	289
1	elatior	10372	10372_G_05	10372_G_05_BL_02	garden	10372_5_BL_2_garden	BL	4N	3_apomictic_facultative_sexual	0	0.867419	1	1	1	1	1	1	humid_forest	59.8038	17.6047	25	1.54095	0.543403	-0.732629	-0.957051	-1.04833	-1.04818	-1.3507	0.906068	-0.828469	-0.962073	0.39542	-0.160456	-0.619362	-0.646581	-1.06474	-0.815411	-0.705665	-0.911643	0.676956	-0.684047	-0.927	-0.662803	-0.657887	26	479	165	432	171
1	elatior	10372	10372_G_05	10372_G_05_RT_01	garden	10372_5_1	RT	4N	3_apomictic_facultative_sexual	0	0.867419	1	1	1	1	1	1	humid_forest	59.8038	17.6047	25	1.54095	0.543403	-0.732629	-0.957051	-1.04833	-1.04818	-1.3507	0.906068	-0.828469	-0.962073	0.39542	-0.160456	-0.619362	-0.646581	-1.06474	-0.815411	-0.705665	-0.911643	0.676956	-0.684047	-0.927	-0.662803	-0.657887	4480	938	213	810	263
1	elatior	10372	10372_G_05	10372_G_05_RT_02	garden	10372_5_2	RT	4N	3_apomictic_facultative_sexual	0	0.867419	1	1	1	1	1	1	humid_forest	59.8038	17.6047	25	1.54095	0.543403	-0.732629	-0.957051	-1.04833	-1.04818	-1.3507	0.906068	-0.828469	-0.962073	0.39542	-0.160456	-0.619362	-0.646581	-1.06474	-0.815411	-0.705665	-0.911643	0.676956	-0.684047	-0.927	-0.662803	-0.657887	4481	965	613	864	587
1	elatior	10372	10372_G_05	10372_G_05_SL_01	garden	10372_5_SL_1	SL	4N	3_apomictic_facultative_sexual	0	0.867419	1	1	1	1	1	1	humid_forest	59.8038	17.6047	25	1.54095	0.543403	-0.732629	-0.957051	-1.04833	-1.04818	-1.3507	0.906068	-0.828469	-0.962073	0.39542	-0.160456	-0.619362	-0.646581	-1.06474	-0.815411	-0.705665	-0.911643	0.676956	-0.684047	-0.927	-0.662803	-0.657887	8299	59	48	44	53
1	elatior	10372	10372_G_05	10372_G_05_SL_02	garden	10372_5_SL_2	SL	4N	3_apomictic_facultative_sexual	0	0.867419	1	1	1	1	1	1	humid_forest	59.8038	17.6047	25	1.54095	0.543403	-0.732629	-0.957051	-1.04833	-1.04818	-1.3507	0.906068	-0.828469	-0.962073	0.39542	-0.160456	-0.619362	-0.646581	-1.06474	-0.815411	-0.705665	-0.911643	0.676956	-0.684047	-0.927	-0.662803	-0.657887	8300	180	32	163	32
1	elatior	10372	10372_G_05	10372_G_05_SL_03	garden	10372_5_SL_3	SL	4N	3_apomictic_facultative_sexual	0	0.867419	1	1	1	1	1	1	humid_forest	59.8038	17.6047	25	1.54095	0.543403	-0.732629	-0.957051	-1.04833	-1.04818	-1.3507	0.906068	-0.828469	-0.962073	0.39542	-0.160456	-0.619362	-0.646581	-1.06474	-0.815411	-0.705665	-0.911643	0.676956	-0.684047	-0.927	-0.662803	-0.657887	8301	220	32	201	29
1	elatior	10372	10372_G_06	10372_G_06_BL_02	garden	10372_6_BL_2_garden	BL	4N	3_apomictic_facultative_sexual	0	0.867419	1	1	1	1	1	1	humid_forest	59.8038	17.6047	25	1.54095	0.543403	-0.732629	-0.957051	-1.04833	-1.04818	-1.3507	0.906068	-0.828469	-0.962073	0.39542	-0.160456	-0.619362	-0.646581	-1.06474	-0.815411	-0.705665	-0.911643	0.676956	-0.684047	-0.927	-0.662803	-0.657887	27	767	354	692	360
1	elatior	10372	10372_G_06	10372_G_06_BL_03	garden	10372_6_BL_3_garden	BL	4N	3_apomictic_facultative_sexual	0	0.867419	1	1	1	1	1	1	humid_forest	59.8038	17.6047	25	1.54095	0.543403	-0.732629	-0.957051	-1.04833	-1.04818	-1.3507	0.906068	-0.828469	-0.962073	0.39542	-0.160456	-0.619362	-0.646581	-1.06474	-0.815411	-0.705665	-0.911643	0.676956	-0.684047	-0.927	-0.662803	-0.657887	28	658	334	602	336
1	elatior	10372	10372_G_06	10372_G_06_RT_01	garden	10372_6_1	RT	4N	3_apomictic_facultative_sexual	0	0.867419	1	1	1	1	1	1	humid_forest	59.8038	17.6047	25	1.54095	0.543403	-0.732629	-0.957051	-1.04833	-1.04818	-1.3507	0.906068	-0.828469	-0.962073	0.39542	-0.160456	-0.619362	-0.646581	-1.06474	-0.815411	-0.705665	-0.911643	0.676956	-0.684047	-0.927	-0.662803	-0.657887	4482	1686	423	1517	309
1	elatior	10372	10372_G_06	10372_G_06_RT_02	garden	10372_6_2	RT	4N	3_apomictic_facultative_sexual	0	0.867419	1	1	1	1	1	1	humid_forest	59.8038	17.6047	25	1.54095	0.543403	-0.732629	-0.957051	-1.04833	-1.04818	-1.3507	0.906068	-0.828469	-0.962073	0.39542	-0.160456	-0.619362	-0.646581	-1.06474	-0.815411	-0.705665	-0.911643	0.676956	-0.684047	-0.927	-0.662803	-0.657887	4483	1218	194	1083	178
1	elatior	10372	10372_G_06	10372_G_06_SL_01	garden	10372_6_SL_1	SL	4N	3_apomictic_facultative_sexual	0	0.867419	1	1	1	1	1	1	humid_forest	59.8038	17.6047	25	1.54095	0.543403	-0.732629	-0.957051	-1.04833	-1.04818	-1.3507	0.906068	-0.828469	-0.962073	0.39542	-0.160456	-0.619362	-0.646581	-1.06474	-0.815411	-0.705665	-0.911643	0.676956	-0.684047	-0.927	-0.662803	-0.657887	8302	149	26	138	28
1	elatior	10372	10372_G_06	10372_G_06_SL_02	garden	10372_6_SL_2	SL	4N	3_apomictic_facultative_sexual	0	0.867419	1	1	1	1	1	1	humid_forest	59.8038	17.6047	25	1.54095	0.543403	-0.732629	-0.957051	-1.04833	-1.04818	-1.3507	0.906068	-0.828469	-0.962073	0.39542	-0.160456	-0.619362	-0.646581	-1.06474	-0.815411	-0.705665	-0.911643	0.676956	-0.684047	-0.927	-0.662803	-0.657887	8303	165	30	154	34
1	elatior	10372	10372_H_08	10372_H_08_BL_01	herbar	10372_8_BL_herbar	BL	4N	3_apomictic_facultative_sexual	0	0.867419	1	1	1	1	1	1	humid_forest	59.8038	17.6047	25	1.54095	0.543403	-0.732629	-0.957051	-1.04833	-1.04818	-1.3507	0.906068	-0.828469	-0.962073	0.39542	-0.160456	-0.619362	-0.646581	-1.06474	-0.815411	-0.705665	-0.911643	0.676956	-0.684047	-0.927	-0.662803	-0.657887	29	898	626	806	622
1	elatior	10372	10372_H_08	10372_H_08_RT_01	herbar	10372_8_herbar	RT	4N	3_apomictic_facultative_sexual	0	0.867419	1	1	1	1	1	1	humid_forest	59.8038	17.6047	25	1.54095	0.543403	-0.732629	-0.957051	-1.04833	-1.04818	-1.3507	0.906068	-0.828469	-0.962073	0.39542	-0.160456	-0.619362	-0.646581	-1.06474	-0.815411	-0.705665	-0.911643	0.676956	-0.684047	-0.927	-0.662803	-0.657887	4484	776	1016	642	1006
1	elatior	10372	10372_H_08	10372_H_08_SL_01	herbar	10372_8_SL_herbar	SL	4N	3_apomictic_facultative_sexual	0	0.867419	1	1	1	1	1	1	humid_forest	59.8038	17.6047	25	1.54095	0.543403	-0.732629	-0.957051	-1.04833	-1.04818	-1.3507	0.906068	-0.828469	-0.962073	0.39542	-0.160456	-0.619362	-0.646581	-1.06474	-0.815411	-0.705665	-0.911643	0.676956	-0.684047	-0.927	-0.662803	-0.657887	8304	1019	993	1009	992
1	elatior	10372	10372_H_09	10372_H_09_BL_01	herbar	10372_9_BL_herbar	BL	4N	3_apomictic_facultative_sexual	0	0.867419	1	1	1	1	1	1	humid_forest	59.8038	17.6047	25	1.54095	0.543403	-0.732629	-0.957051	-1.04833	-1.04818	-1.3507	0.906068	-0.828469	-0.962073	0.39542	-0.160456	-0.619362	-0.646581	-1.06474	-0.815411	-0.705665	-0.911643	0.676956	-0.684047	-0.927	-0.662803	-0.657887	30	983	697	835	720
1	elatior	10372	10372_H_09	10372_H_09_RT_01	herbar	10372_9_herbar	RT	4N	3_apomictic_facultative_sexual	0	0.867419	1	1	1	1	1	1	humid_forest	59.8038	17.6047	25	1.54095	0.543403	-0.732629	-0.957051	-1.04833	-1.04818	-1.3507	0.906068	-0.828469	-0.962073	0.39542	-0.160456	-0.619362	-0.646581	-1.06474	-0.815411	-0.705665	-0.911643	0.676956	-0.684047	-0.927	-0.662803	-0.657887	4485	1169	1239	1123	1082
1	elatior	10372	10372_H_09	10372_H_09_SL_01	herbar	10372_9_SL_herbar	SL	4N	3_apomictic_facultative_sexual	0	0.867419	1	1	1	1	1	1	humid_forest	59.8038	17.6047	25	1.54095	0.543403	-0.732629	-0.957051	-1.04833	-1.04818	-1.3507	0.906068	-0.828469	-0.962073	0.39542	-0.160456	-0.619362	-0.646581	-1.06474	-0.815411	-0.705665	-0.911643	0.676956	-0.684047	-0.927	-0.662803	-0.657887	8305	1019	733	1012	742
1	elatior	10372	10372_H_10	10372_H_10_BL_01	herbar	10372_10_BL_herbar	BL	4N	3_apomictic_facultative_sexual	0	0.867419	1	1	1	1	1	1	humid_forest	59.8038	17.6047	25	1.54095	0.543403	-0.732629	-0.957051	-1.04833	-1.04818	-1.3507	0.906068	-0.828469	-0.962073	0.39542	-0.160456	-0.619362	-0.646581	-1.06474	-0.815411	-0.705665	-0.911643	0.676956	-0.684047	-0.927	-0.662803	-0.657887	31	936	585	903	590
1	elatior	10372	10372_H_10	10372_H_10_RT_01	herbar	10372_10_herbar	RT	4N	3_apomictic_facultative_sexual	0	0.867419	1	1	1	1	1	1	humid_forest	59.8038	17.6047	25	1.54095	0.543403	-0.732629	-0.957051	-1.04833	-1.04818	-1.3507	0.906068	-0.828469	-0.962073	0.39542	-0.160456	-0.619362	-0.646581	-1.06474	-0.815411	-0.705665	-0.911643	0.676956	-0.684047	-0.927	-0.662803	-0.657887	4486	604	1090	537	1101
1	elatior	10372	10372_H_10	10372_H_10_SL_01	herbar	10372_10_SL_herbar	SL	4N	3_apomictic_facultative_sexual	0	0.867419	1	1	1	1	1	1	humid_forest	59.8038	17.6047	25	1.54095	0.543403	-0.732629	-0.957051	-1.04833	-1.04818	-1.3507	0.906068	-0.828469	-0.962073	0.39542	-0.160456	-0.619362	-0.646581	-1.06474	-0.815411	-0.705665	-0.911643	0.676956	-0.684047	-0.927	-0.662803	-0.657887	8306	832	760	832	746
1	elatior	10466	10466_G_01	10466_G_01_BL_01	garden	10466_1_BL_1_garden	BL	4N_6N	3_apomictic_facultative_sexual	5	1.16151	1	1	1	1	1	1	forest	60.1749	22.0271	20	1.61045	1.26638	-0.746049	-1.01751	-1.29493	-0.770562	-1.3507	1.34817	-0.636681	-1.35236	0.9984	-1.25142	0.486656	-0.587822	-1.38677	-0.382541	-0.578848	-0.485266	0.242017	-0.562568	-0.52207	-0.789568	0.123354	155	776	301	731	346
1	elatior	10466	10466_G_01	10466_G_01_RT_01	garden	10466_1_1	RT	4N_6N	3_apomictic_facultative_sexual	5	1.16151	1	1	1	1	1	1	forest	60.1749	22.0271	20	1.61045	1.26638	-0.746049	-1.01751	-1.29493	-0.770562	-1.3507	1.34817	-0.636681	-1.35236	0.9984	-1.25142	0.486656	-0.587822	-1.38677	-0.382541	-0.578848	-0.485266	0.242017	-0.562568	-0.52207	-0.789568	0.123354	4584	1960	322	1912	157
1	elatior	10466	10466_G_01	10466_G_01_RT_01	garden	10466_1_1_Vergrˆﬂerung_1,25	RT	4N_6N	3_apomictic_facultative_sexual	5	1.16151	1	1	1	1	1	1	forest	60.1749	22.0271	20	1.61045	1.26638	-0.746049	-1.01751	-1.29493	-0.770562	-1.3507	1.34817	-0.636681	-1.35236	0.9984	-1.25142	0.486656	-0.587822	-1.38677	-0.382541	-0.578848	-0.485266	0.242017	-0.562568	-0.52207	-0.789568	0.123354	4585	1595	628	1526	456
1	elatior	10466	10466_G_01	10466_G_01_RT_02	garden	10466_1_2	RT	4N_6N	3_apomictic_facultative_sexual	5	1.16151	1	1	1	1	1	1	forest	60.1749	22.0271	20	1.61045	1.26638	-0.746049	-1.01751	-1.29493	-0.770562	-1.3507	1.34817	-0.636681	-1.35236	0.9984	-1.25142	0.486656	-0.587822	-1.38677	-0.382541	-0.578848	-0.485266	0.242017	-0.562568	-0.52207	-0.789568	0.123354	4586	771	361	566	354
1	elatior	10466	10466_G_01	10466_G_01_RT_02	garden	10466_1_2_Vergrˆﬂerung_1,25	RT	4N_6N	3_apomictic_facultative_sexual	5	1.16151	1	1	1	1	1	1	forest	60.1749	22.0271	20	1.61045	1.26638	-0.746049	-1.01751	-1.29493	-0.770562	-1.3507	1.34817	-0.636681	-1.35236	0.9984	-1.25142	0.486656	-0.587822	-1.38677	-0.382541	-0.578848	-0.485266	0.242017	-0.562568	-0.52207	-0.789568	0.123354	4587	1098	912	1004	919
1	elatior	10466	10466_G_01	10466_G_01_SL_01	garden	10466_1_SL_1_garden	SL	4N_6N	3_apomictic_facultative_sexual	5	1.16151	1	1	1	1	1	1	forest	60.1749	22.0271	20	1.61045	1.26638	-0.746049	-1.01751	-1.29493	-0.770562	-1.3507	1.34817	-0.636681	-1.35236	0.9984	-1.25142	0.486656	-0.587822	-1.38677	-0.382541	-0.578848	-0.485266	0.242017	-0.562568	-0.52207	-0.789568	0.123354	8425	251	124	231	128
1	elatior	10466	10466_G_02	10466_G_02_BL_01	garden	10466_2_BL_1_garden	BL	4N_6N	3_apomictic_facultative_sexual	5	1.16151	1	1	1	1	1	1	forest	60.1749	22.0271	20	1.61045	1.26638	-0.746049	-1.01751	-1.29493	-0.770562	-1.3507	1.34817	-0.636681	-1.35236	0.9984	-1.25142	0.486656	-0.587822	-1.38677	-0.382541	-0.578848	-0.485266	0.242017	-0.562568	-0.52207	-0.789568	0.123354	156	1272	890	1219	920
1	elatior	10466	10466_G_02	10466_G_02_BL_02	garden	10466_2_BL_2_garden	BL	4N_6N	3_apomictic_facultative_sexual	5	1.16151	1	1	1	1	1	1	forest	60.1749	22.0271	20	1.61045	1.26638	-0.746049	-1.01751	-1.29493	-0.770562	-1.3507	1.34817	-0.636681	-1.35236	0.9984	-1.25142	0.486656	-0.587822	-1.38677	-0.382541	-0.578848	-0.485266	0.242017	-0.562568	-0.52207	-0.789568	0.123354	157	947	470	893	485
1	elatior	10466	10466_G_02	10466_G_02_RT_01	garden	10466_2_1	RT	4N_6N	3_apomictic_facultative_sexual	5	1.16151	1	1	1	1	1	1	forest	60.1749	22.0271	20	1.61045	1.26638	-0.746049	-1.01751	-1.29493	-0.770562	-1.3507	1.34817	-0.636681	-1.35236	0.9984	-1.25142	0.486656	-0.587822	-1.38677	-0.382541	-0.578848	-0.485266	0.242017	-0.562568	-0.52207	-0.789568	0.123354	4588	505	1003	295	1079
1	elatior	10466	10466_G_02	10466_G_02_SL_01	garden	10466_2_SL_1_garden	SL	4N_6N	3_apomictic_facultative_sexual	5	1.16151	1	1	1	1	1	1	forest	60.1749	22.0271	20	1.61045	1.26638	-0.746049	-1.01751	-1.29493	-0.770562	-1.3507	1.34817	-0.636681	-1.35236	0.9984	-1.25142	0.486656	-0.587822	-1.38677	-0.382541	-0.578848	-0.485266	0.242017	-0.562568	-0.52207	-0.789568	0.123354	8426	336	142	323	143
1	elatior	10466	10466_G_03	10466_G_03_BL_01	garden	10466_3_BL_1_garden	BL	4N_6N	3_apomictic_facultative_sexual	5	1.16151	1	1	1	1	1	1	forest	60.1749	22.0271	20	1.61045	1.26638	-0.746049	-1.01751	-1.29493	-0.770562	-1.3507	1.34817	-0.636681	-1.35236	0.9984	-1.25142	0.486656	-0.587822	-1.38677	-0.382541	-0.578848	-0.485266	0.242017	-0.562568	-0.52207	-0.789568	0.123354	158	676	327	614	368
1	elatior	10466	10466_G_03	10466_G_03_BL_02	garden	10466_3_BL_2_garden	BL	4N_6N	3_apomictic_facultative_sexual	5	1.16151	1	1	1	1	1	1	forest	60.1749	22.0271	20	1.61045	1.26638	-0.746049	-1.01751	-1.29493	-0.770562	-1.3507	1.34817	-0.636681	-1.35236	0.9984	-1.25142	0.486656	-0.587822	-1.38677	-0.382541	-0.578848	-0.485266	0.242017	-0.562568	-0.52207	-0.789568	0.123354	159	592	471	553	438
1	elatior	10466	10466_G_03	10466_G_03_BL_03	garden	10466_3_BL_3_garden	BL	4N_6N	3_apomictic_facultative_sexual	5	1.16151	1	1	1	1	1	1	forest	60.1749	22.0271	20	1.61045	1.26638	-0.746049	-1.01751	-1.29493	-0.770562	-1.3507	1.34817	-0.636681	-1.35236	0.9984	-1.25142	0.486656	-0.587822	-1.38677	-0.382541	-0.578848	-0.485266	0.242017	-0.562568	-0.52207	-0.789568	0.123354	160	665	399	615	432
1	elatior	10466	10466_G_03	10466_G_03_RT_01	garden	10466_3_1_garden	RT	4N_6N	3_apomictic_facultative_sexual	5	1.16151	1	1	1	1	1	1	forest	60.1749	22.0271	20	1.61045	1.26638	-0.746049	-1.01751	-1.29493	-0.770562	-1.3507	1.34817	-0.636681	-1.35236	0.9984	-1.25142	0.486656	-0.587822	-1.38677	-0.382541	-0.578848	-0.485266	0.242017	-0.562568	-0.52207	-0.789568	0.123354	4589	884	1025	789	930
1	elatior	10466	10466_G_03	10466_G_03_RT_01	garden	10466_3_1_garden	RT	4N_6N	3_apomictic_facultative_sexual	5	1.16151	1	1	1	1	1	1	forest	60.1749	22.0271	20	1.61045	1.26638	-0.746049	-1.01751	-1.29493	-0.770562	-1.3507	1.34817	-0.636681	-1.35236	0.9984	-1.25142	0.486656	-0.587822	-1.38677	-0.382541	-0.578848	-0.485266	0.242017	-0.562568	-0.52207	-0.789568	0.123354	4590	1629	251	1515	88
1	elatior	10466	10466_G_03	10466_G_03_RT_02	garden	10466_3_2_garden	RT	4N_6N	3_apomictic_facultative_sexual	5	1.16151	1	1	1	1	1	1	forest	60.1749	22.0271	20	1.61045	1.26638	-0.746049	-1.01751	-1.29493	-0.770562	-1.3507	1.34817	-0.636681	-1.35236	0.9984	-1.25142	0.486656	-0.587822	-1.38677	-0.382541	-0.578848	-0.485266	0.242017	-0.562568	-0.52207	-0.789568	0.123354	4591	735	1155	648	1063
1	elatior	10466	10466_G_03	10466_G_03_RT_02	garden	10466_3_2_garden	RT	4N_6N	3_apomictic_facultative_sexual	5	1.16151	1	1	1	1	1	1	forest	60.1749	22.0271	20	1.61045	1.26638	-0.746049	-1.01751	-1.29493	-0.770562	-1.3507	1.34817	-0.636681	-1.35236	0.9984	-1.25142	0.486656	-0.587822	-1.38677	-0.382541	-0.578848	-0.485266	0.242017	-0.562568	-0.52207	-0.789568	0.123354	4592	1375	451	1258	337
1	elatior	10466	10466_G_03	10466_G_03_SL_01	garden	10466_3_SL_1_garden	SL	4N_6N	3_apomictic_facultative_sexual	5	1.16151	1	1	1	1	1	1	forest	60.1749	22.0271	20	1.61045	1.26638	-0.746049	-1.01751	-1.29493	-0.770562	-1.3507	1.34817	-0.636681	-1.35236	0.9984	-1.25142	0.486656	-0.587822	-1.38677	-0.382541	-0.578848	-0.485266	0.242017	-0.562568	-0.52207	-0.789568	0.123354	8427	142	75	122	79
1	elatior	10466	10466_G_03	10466_G_03_SL_02	garden	10466_3_SL_2_garden	SL	4N_6N	3_apomictic_facultative_sexual	5	1.16151	1	1	1	1	1	1	forest	60.1749	22.0271	20	1.61045	1.26638	-0.746049	-1.01751	-1.29493	-0.770562	-1.3507	1.34817	-0.636681	-1.35236	0.9984	-1.25142	0.486656	-0.587822	-1.38677	-0.382541	-0.578848	-0.485266	0.242017	-0.562568	-0.52207	-0.789568	0.123354	8428	241	57	234	52
1	elatior	10466	10466_G_04	10466_G_04_BL_01	garden	10466_4_BL_1_garden	BL	4N_6N	3_apomictic_facultative_sexual	5	1.16151	1	1	1	1	1	1	forest	60.1749	22.0271	20	1.61045	1.26638	-0.746049	-1.01751	-1.29493	-0.770562	-1.3507	1.34817	-0.636681	-1.35236	0.9984	-1.25142	0.486656	-0.587822	-1.38677	-0.382541	-0.578848	-0.485266	0.242017	-0.562568	-0.52207	-0.789568	0.123354	161	980	531	894	553
1	elatior	10466	10466_G_04	10466_G_04_BL_02	garden	10466_4_BL_2_garden	BL	4N_6N	3_apomictic_facultative_sexual	5	1.16151	1	1	1	1	1	1	forest	60.1749	22.0271	20	1.61045	1.26638	-0.746049	-1.01751	-1.29493	-0.770562	-1.3507	1.34817	-0.636681	-1.35236	0.9984	-1.25142	0.486656	-0.587822	-1.38677	-0.382541	-0.578848	-0.485266	0.242017	-0.562568	-0.52207	-0.789568	0.123354	162	528	276	478	265
1	elatior	10466	10466_G_04	10466_G_04_RT_01	garden	10466_4_1_garden	RT	4N_6N	3_apomictic_facultative_sexual	5	1.16151	1	1	1	1	1	1	forest	60.1749	22.0271	20	1.61045	1.26638	-0.746049	-1.01751	-1.29493	-0.770562	-1.3507	1.34817	-0.636681	-1.35236	0.9984	-1.25142	0.486656	-0.587822	-1.38677	-0.382541	-0.578848	-0.485266	0.242017	-0.562568	-0.52207	-0.789568	0.123354	4593	836	1053	745	938
1	elatior	10466	10466_G_04	10466_G_04_RT_01	garden	10466_4_1_garden	RT	4N_6N	3_apomictic_facultative_sexual	5	1.16151	1	1	1	1	1	1	forest	60.1749	22.0271	20	1.61045	1.26638	-0.746049	-1.01751	-1.29493	-0.770562	-1.3507	1.34817	-0.636681	-1.35236	0.9984	-1.25142	0.486656	-0.587822	-1.38677	-0.382541	-0.578848	-0.485266	0.242017	-0.562568	-0.52207	-0.789568	0.123354	4594	1541	311	1464	123
1	elatior	10466	10466_G_04	10466_G_04_RT_02	garden	10466_4_2_garden	RT	4N_6N	3_apomictic_facultative_sexual	5	1.16151	1	1	1	1	1	1	forest	60.1749	22.0271	20	1.61045	1.26638	-0.746049	-1.01751	-1.29493	-0.770562	-1.3507	1.34817	-0.636681	-1.35236	0.9984	-1.25142	0.486656	-0.587822	-1.38677	-0.382541	-0.578848	-0.485266	0.242017	-0.562568	-0.52207	-0.789568	0.123354	4595	971	1170	902	1034
1	elatior	10466	10466_G_04	10466_G_04_RT_02	garden	10466_4_2_garden	RT	4N_6N	3_apomictic_facultative_sexual	5	1.16151	1	1	1	1	1	1	forest	60.1749	22.0271	20	1.61045	1.26638	-0.746049	-1.01751	-1.29493	-0.770562	-1.3507	1.34817	-0.636681	-1.35236	0.9984	-1.25142	0.486656	-0.587822	-1.38677	-0.382541	-0.578848	-0.485266	0.242017	-0.562568	-0.52207	-0.789568	0.123354	4596	1798	533	1764	340
1	elatior	10466	10466_G_04	10466_G_04_SL_01	garden	10466_4_SL_1_garden	SL	4N_6N	3_apomictic_facultative_sexual	5	1.16151	1	1	1	1	1	1	forest	60.1749	22.0271	20	1.61045	1.26638	-0.746049	-1.01751	-1.29493	-0.770562	-1.3507	1.34817	-0.636681	-1.35236	0.9984	-1.25142	0.486656	-0.587822	-1.38677	-0.382541	-0.578848	-0.485266	0.242017	-0.562568	-0.52207	-0.789568	0.123354	8429	394	146	379	131
1	elatior	10466	10466_G_04	10466_G_04_SL_02	garden	10466_4_SL_2_garden	SL	4N_6N	3_apomictic_facultative_sexual	5	1.16151	1	1	1	1	1	1	forest	60.1749	22.0271	20	1.61045	1.26638	-0.746049	-1.01751	-1.29493	-0.770562	-1.3507	1.34817	-0.636681	-1.35236	0.9984	-1.25142	0.486656	-0.587822	-1.38677	-0.382541	-0.578848	-0.485266	0.242017	-0.562568	-0.52207	-0.789568	0.123354	8430	334	144	319	143
1	elatior	10466	10466_G_05	10466_G_05_BL_01	garden	10466_5_BL_1_garden	BL	4N_6N	3_apomictic_facultative_sexual	5	1.16151	1	1	1	1	1	1	forest	60.1749	22.0271	20	1.61045	1.26638	-0.746049	-1.01751	-1.29493	-0.770562	-1.3507	1.34817	-0.636681	-1.35236	0.9984	-1.25142	0.486656	-0.587822	-1.38677	-0.382541	-0.578848	-0.485266	0.242017	-0.562568	-0.52207	-0.789568	0.123354	163	804	571	736	585
1	elatior	10466	10466_G_05	10466_G_05_BL_02	garden	10466_5_BL_2_garden	BL	4N_6N	3_apomictic_facultative_sexual	5	1.16151	1	1	1	1	1	1	forest	60.1749	22.0271	20	1.61045	1.26638	-0.746049	-1.01751	-1.29493	-0.770562	-1.3507	1.34817	-0.636681	-1.35236	0.9984	-1.25142	0.486656	-0.587822	-1.38677	-0.382541	-0.578848	-0.485266	0.242017	-0.562568	-0.52207	-0.789568	0.123354	164	710	449	649	477
1	elatior	10466	10466_G_05	10466_G_05_RT_01	garden	10466_5_1	RT	4N_6N	3_apomictic_facultative_sexual	5	1.16151	1	1	1	1	1	1	forest	60.1749	22.0271	20	1.61045	1.26638	-0.746049	-1.01751	-1.29493	-0.770562	-1.3507	1.34817	-0.636681	-1.35236	0.9984	-1.25142	0.486656	-0.587822	-1.38677	-0.382541	-0.578848	-0.485266	0.242017	-0.562568	-0.52207	-0.789568	0.123354	4597	1616	514	1453	376
1	elatior	10466	10466_G_05	10466_G_05_RT_02	garden	10466_5_2	RT	4N_6N	3_apomictic_facultative_sexual	5	1.16151	1	1	1	1	1	1	forest	60.1749	22.0271	20	1.61045	1.26638	-0.746049	-1.01751	-1.29493	-0.770562	-1.3507	1.34817	-0.636681	-1.35236	0.9984	-1.25142	0.486656	-0.587822	-1.38677	-0.382541	-0.578848	-0.485266	0.242017	-0.562568	-0.52207	-0.789568	0.123354	4598	1670	222	1657	59
1	elatior	10466	10466_G_05	10466_G_05_SL_01	garden	10466_5_SL_1_garden	SL	4N_6N	3_apomictic_facultative_sexual	5	1.16151	1	1	1	1	1	1	forest	60.1749	22.0271	20	1.61045	1.26638	-0.746049	-1.01751	-1.29493	-0.770562	-1.3507	1.34817	-0.636681	-1.35236	0.9984	-1.25142	0.486656	-0.587822	-1.38677	-0.382541	-0.578848	-0.485266	0.242017	-0.562568	-0.52207	-0.789568	0.123354	8431	350	149	329	141
1	elatior	10466	10466_G_05	10466_G_05_SL_02	garden	10466_5_SL_2_garden	SL	4N_6N	3_apomictic_facultative_sexual	5	1.16151	1	1	1	1	1	1	forest	60.1749	22.0271	20	1.61045	1.26638	-0.746049	-1.01751	-1.29493	-0.770562	-1.3507	1.34817	-0.636681	-1.35236	0.9984	-1.25142	0.486656	-0.587822	-1.38677	-0.382541	-0.578848	-0.485266	0.242017	-0.562568	-0.52207	-0.789568	0.123354	8432	334	106	319	95
1	elatior	10466	10466_G_06	10466_G_06_BL_01	garden	10466_6_BL_1_garden	BL	4N_6N	3_apomictic_facultative_sexual	5	1.16151	1	1	1	1	1	1	forest	60.1749	22.0271	20	1.61045	1.26638	-0.746049	-1.01751	-1.29493	-0.770562	-1.3507	1.34817	-0.636681	-1.35236	0.9984	-1.25142	0.486656	-0.587822	-1.38677	-0.382541	-0.578848	-0.485266	0.242017	-0.562568	-0.52207	-0.789568	0.123354	165	916	501	852	526
1	elatior	10466	10466_G_06	10466_G_06_BL_02	garden	10466_6_BL_2_garden	BL	4N_6N	3_apomictic_facultative_sexual	5	1.16151	1	1	1	1	1	1	forest	60.1749	22.0271	20	1.61045	1.26638	-0.746049	-1.01751	-1.29493	-0.770562	-1.3507	1.34817	-0.636681	-1.35236	0.9984	-1.25142	0.486656	-0.587822	-1.38677	-0.382541	-0.578848	-0.485266	0.242017	-0.562568	-0.52207	-0.789568	0.123354	166	1162	755	1068	800
1	elatior	10466	10466_G_06	10466_G_06_RT_01	garden	10466_6_1	RT	4N_6N	3_apomictic_facultative_sexual	5	1.16151	1	1	1	1	1	1	forest	60.1749	22.0271	20	1.61045	1.26638	-0.746049	-1.01751	-1.29493	-0.770562	-1.3507	1.34817	-0.636681	-1.35236	0.9984	-1.25142	0.486656	-0.587822	-1.38677	-0.382541	-0.578848	-0.485266	0.242017	-0.562568	-0.52207	-0.789568	0.123354	4599	1905	439	1817	338
1	elatior	10466	10466_G_06	10466_G_06_RT_02	garden	10466_6_2	RT	4N_6N	3_apomictic_facultative_sexual	5	1.16151	1	1	1	1	1	1	forest	60.1749	22.0271	20	1.61045	1.26638	-0.746049	-1.01751	-1.29493	-0.770562	-1.3507	1.34817	-0.636681	-1.35236	0.9984	-1.25142	0.486656	-0.587822	-1.38677	-0.382541	-0.578848	-0.485266	0.242017	-0.562568	-0.52207	-0.789568	0.123354	4600	970	338	876	235
1	elatior	10466	10466_G_06	10466_G_06_SL_01	garden	10466_6_SL_1_garden	SL	4N_6N	3_apomictic_facultative_sexual	5	1.16151	1	1	1	1	1	1	forest	60.1749	22.0271	20	1.61045	1.26638	-0.746049	-1.01751	-1.29493	-0.770562	-1.3507	1.34817	-0.636681	-1.35236	0.9984	-1.25142	0.486656	-0.587822	-1.38677	-0.382541	-0.578848	-0.485266	0.242017	-0.562568	-0.52207	-0.789568	0.123354	8433	270	124	250	131
1	elatior	10466	10466_G_06	10466_G_06_SL_02	garden	10466_6_SL_2_garden	SL	4N_6N	3_apomictic_facultative_sexual	5	1.16151	1	1	1	1	1	1	forest	60.1749	22.0271	20	1.61045	1.26638	-0.746049	-1.01751	-1.29493	-0.770562	-1.3507	1.34817	-0.636681	-1.35236	0.9984	-1.25142	0.486656	-0.587822	-1.38677	-0.382541	-0.578848	-0.485266	0.242017	-0.562568	-0.52207	-0.789568	0.123354	8434	225	105	206	116
1	elatior	10466	10466_H_07	10466_H_07_BL_01	herbar	10466_7_BL_herbar	BL	4N_6N	3_apomictic_facultative_sexual	5	1.16151	1	1	1	1	1	1	forest	60.1749	22.0271	20	1.61045	1.26638	-0.746049	-1.01751	-1.29493	-0.770562	-1.3507	1.34817	-0.636681	-1.35236	0.9984	-1.25142	0.486656	-0.587822	-1.38677	-0.382541	-0.578848	-0.485266	0.242017	-0.562568	-0.52207	-0.789568	0.123354	167	785	772	741	802
1	elatior	10466	10466_H_07	10466_H_07_SL_01	herbar	10466_7_SL_herbar	SL	4N_6N	3_apomictic_facultative_sexual	5	1.16151	1	1	1	1	1	1	forest	60.1749	22.0271	20	1.61045	1.26638	-0.746049	-1.01751	-1.29493	-0.770562	-1.3507	1.34817	-0.636681	-1.35236	0.9984	-1.25142	0.486656	-0.587822	-1.38677	-0.382541	-0.578848	-0.485266	0.242017	-0.562568	-0.52207	-0.789568	0.123354	8435	962	818	948	809
1	elatior	10466	10466_H_08	10466_H_08_BL_01	herbar	10466_8_BL_herbar	BL	4N_6N	3_apomictic_facultative_sexual	5	1.16151	1	1	1	1	1	1	forest	60.1749	22.0271	20	1.61045	1.26638	-0.746049	-1.01751	-1.29493	-0.770562	-1.3507	1.34817	-0.636681	-1.35236	0.9984	-1.25142	0.486656	-0.587822	-1.38677	-0.382541	-0.578848	-0.485266	0.242017	-0.562568	-0.52207	-0.789568	0.123354	168	804	593	750	593
1	elatior	10466	10466_H_08	10466_H_08_RT_01	herbar	10466_8_herbar	RT	4N_6N	3_apomictic_facultative_sexual	5	1.16151	1	1	1	1	1	1	forest	60.1749	22.0271	20	1.61045	1.26638	-0.746049	-1.01751	-1.29493	-0.770562	-1.3507	1.34817	-0.636681	-1.35236	0.9984	-1.25142	0.486656	-0.587822	-1.38677	-0.382541	-0.578848	-0.485266	0.242017	-0.562568	-0.52207	-0.789568	0.123354	4601	1249	1115	1242	977
1	elatior	10466	10466_H_08	10466_H_08_SL_01	herbar	10466_8_SL_herbar	SL	4N_6N	3_apomictic_facultative_sexual	5	1.16151	1	1	1	1	1	1	forest	60.1749	22.0271	20	1.61045	1.26638	-0.746049	-1.01751	-1.29493	-0.770562	-1.3507	1.34817	-0.636681	-1.35236	0.9984	-1.25142	0.486656	-0.587822	-1.38677	-0.382541	-0.578848	-0.485266	0.242017	-0.562568	-0.52207	-0.789568	0.123354	8436	1015	773	998	775
1	elatior	10466	10466_H_13	10466_H_13_BL_01	herbar	10466_13_BL_herbar	BL	4N_6N	3_apomictic_facultative_sexual	5	1.16151	1	1	1	1	1	1	forest	60.1749	22.0271	20	1.61045	1.26638	-0.746049	-1.01751	-1.29493	-0.770562	-1.3507	1.34817	-0.636681	-1.35236	0.9984	-1.25142	0.486656	-0.587822	-1.38677	-0.382541	-0.578848	-0.485266	0.242017	-0.562568	-0.52207	-0.789568	0.123354	169	781	542	735	538
1	elatior	10466	10466_H_13	10466_H_13_RT_01	herbar	10466_13_herbar	RT	4N_6N	3_apomictic_facultative_sexual	5	1.16151	1	1	1	1	1	1	forest	60.1749	22.0271	20	1.61045	1.26638	-0.746049	-1.01751	-1.29493	-0.770562	-1.3507	1.34817	-0.636681	-1.35236	0.9984	-1.25142	0.486656	-0.587822	-1.38677	-0.382541	-0.578848	-0.485266	0.242017	-0.562568	-0.52207	-0.789568	0.123354	4602	712	1032	602	1031
1	elatior	10466	10466_H_13	10466_H_13_SL_01	herbar	10466_13_SL_herbar	SL	4N_6N	3_apomictic_facultative_sexual	5	1.16151	1	1	1	1	1	1	forest	60.1749	22.0271	20	1.61045	1.26638	-0.746049	-1.01751	-1.29493	-0.770562	-1.3507	1.34817	-0.636681	-1.35236	0.9984	-1.25142	0.486656	-0.587822	-1.38677	-0.382541	-0.578848	-0.485266	0.242017	-0.562568	-0.52207	-0.789568	0.123354	8437	726	693	726	705
1	hannae	KK260	KK260_G_01	KK260_G_01_BL_01	garden	KK260_01_BL_1_garden	BL	6N	NA	2	1.64823	1	1	1	1	1	1	forest	50.3395	20.1574	310	-0.231016	0.960715	0.0322593	-0.235643	-0.209862	0.525014	-0.343942	1.16538	0.0345752	-1.104	1.27979	0.536545	-0.928018	-0.000234099	-0.90372	-0.118838	0.477966	-0.627392	2.12675	0.606671	-0.589559	0.85838	-0.822359	372	680	285	652	319
1	hannae	KK260	KK260_G_01	KK260_G_01_BL_02	garden	KK260_01_BL_2_garden	BL	6N	NA	2	1.64823	1	1	1	1	1	1	forest	50.3395	20.1574	310	-0.231016	0.960715	0.0322593	-0.235643	-0.209862	0.525014	-0.343942	1.16538	0.0345752	-1.104	1.27979	0.536545	-0.928018	-0.000234099	-0.90372	-0.118838	0.477966	-0.627392	2.12675	0.606671	-0.589559	0.85838	-0.822359	373	501	151	439	175
1	hannae	KK260	KK260_G_01	KK260_G_01_BL_03	garden	KK260_01_BL_3_garden	BL	6N	NA	2	1.64823	1	1	1	1	1	1	forest	50.3395	20.1574	310	-0.231016	0.960715	0.0322593	-0.235643	-0.209862	0.525014	-0.343942	1.16538	0.0345752	-1.104	1.27979	0.536545	-0.928018	-0.000234099	-0.90372	-0.118838	0.477966	-0.627392	2.12675	0.606671	-0.589559	0.85838	-0.822359	374	452	218	422	233
1	hannae	KK260	KK260_G_01	KK260_G_01_SL_01	garden	KK260_01_SL_1_garden	SL	6N	NA	2	1.64823	1	1	1	1	1	1	forest	50.3395	20.1574	310	-0.231016	0.960715	0.0322593	-0.235643	-0.209862	0.525014	-0.343942	1.16538	0.0345752	-1.104	1.27979	0.536545	-0.928018	-0.000234099	-0.90372	-0.118838	0.477966	-0.627392	2.12675	0.606671	-0.589559	0.85838	-0.822359	8660	157	55	136	53
1	hannae	KK260	KK260_G_01	KK260_G_01_SL_02	garden	KK260_01_SL_2_garden	SL	6N	NA	2	1.64823	1	1	1	1	1	1	forest	50.3395	20.1574	310	-0.231016	0.960715	0.0322593	-0.235643	-0.209862	0.525014	-0.343942	1.16538	0.0345752	-1.104	1.27979	0.536545	-0.928018	-0.000234099	-0.90372	-0.118838	0.477966	-0.627392	2.12675	0.606671	-0.589559	0.85838	-0.822359	8661	172	56	153	58
1	hannae	KK260	KK260_G_01	KK260_G_01_SL_03	garden	KK260_01_SL_3_garden	SL	6N	NA	2	1.64823	1	1	1	1	1	1	forest	50.3395	20.1574	310	-0.231016	0.960715	0.0322593	-0.235643	-0.209862	0.525014	-0.343942	1.16538	0.0345752	-1.104	1.27979	0.536545	-0.928018	-0.000234099	-0.90372	-0.118838	0.477966	-0.627392	2.12675	0.606671	-0.589559	0.85838	-0.822359	8662	222	77	203	68
1	hannae	KK260	KK260_G_02	KK260_G_02_BL_01	garden	KK260_02_BL_1_garden	BL	6N	NA	2	1.64823	1	1	1	1	1	1	forest	50.3395	20.1574	310	-0.231016	0.960715	0.0322593	-0.235643	-0.209862	0.525014	-0.343942	1.16538	0.0345752	-1.104	1.27979	0.536545	-0.928018	-0.000234099	-0.90372	-0.118838	0.477966	-0.627392	2.12675	0.606671	-0.589559	0.85838	-0.822359	375	451	245	410	257
1	hannae	KK260	KK260_G_02	KK260_G_02_BL_02	garden	KK260_02_BL_2_garden	BL	6N	NA	2	1.64823	1	1	1	1	1	1	forest	50.3395	20.1574	310	-0.231016	0.960715	0.0322593	-0.235643	-0.209862	0.525014	-0.343942	1.16538	0.0345752	-1.104	1.27979	0.536545	-0.928018	-0.000234099	-0.90372	-0.118838	0.477966	-0.627392	2.12675	0.606671	-0.589559	0.85838	-0.822359	376	621	287	567	300
1	hannae	KK260	KK260_G_02	KK260_G_02_BL_03	garden	KK260_02_BL_3_garden	BL	6N	NA	2	1.64823	1	1	1	1	1	1	forest	50.3395	20.1574	310	-0.231016	0.960715	0.0322593	-0.235643	-0.209862	0.525014	-0.343942	1.16538	0.0345752	-1.104	1.27979	0.536545	-0.928018	-0.000234099	-0.90372	-0.118838	0.477966	-0.627392	2.12675	0.606671	-0.589559	0.85838	-0.822359	377	482	238	436	258
1	hannae	KK260	KK260_G_02	KK260_G_02_RT_01	garden	KK260_02_1_garden	RT	6N	NA	2	1.64823	1	1	1	1	1	1	forest	50.3395	20.1574	310	-0.231016	0.960715	0.0322593	-0.235643	-0.209862	0.525014	-0.343942	1.16538	0.0345752	-1.104	1.27979	0.536545	-0.928018	-0.000234099	-0.90372	-0.118838	0.477966	-0.627392	2.12675	0.606671	-0.589559	0.85838	-0.822359	4810	546	1184	454	1182
1	hannae	KK260	KK260_G_02	KK260_G_02_RT_01	garden	KK260_02_1_garden	RT	6N	NA	2	1.64823	1	1	1	1	1	1	forest	50.3395	20.1574	310	-0.231016	0.960715	0.0322593	-0.235643	-0.209862	0.525014	-0.343942	1.16538	0.0345752	-1.104	1.27979	0.536545	-0.928018	-0.000234099	-0.90372	-0.118838	0.477966	-0.627392	2.12675	0.606671	-0.589559	0.85838	-0.822359	4811	1017	563	864	532
1	hannae	KK260	KK260_G_02	KK260_G_02_RT_02	garden	KK260_02_2_garden	RT	6N	NA	2	1.64823	1	1	1	1	1	1	forest	50.3395	20.1574	310	-0.231016	0.960715	0.0322593	-0.235643	-0.209862	0.525014	-0.343942	1.16538	0.0345752	-1.104	1.27979	0.536545	-0.928018	-0.000234099	-0.90372	-0.118838	0.477966	-0.627392	2.12675	0.606671	-0.589559	0.85838	-0.822359	4812	544	1139	459	1162
1	hannae	KK260	KK260_G_02	KK260_G_02_RT_02	garden	KK260_02_2_garden	RT	6N	NA	2	1.64823	1	1	1	1	1	1	forest	50.3395	20.1574	310	-0.231016	0.960715	0.0322593	-0.235643	-0.209862	0.525014	-0.343942	1.16538	0.0345752	-1.104	1.27979	0.536545	-0.928018	-0.000234099	-0.90372	-0.118838	0.477966	-0.627392	2.12675	0.606671	-0.589559	0.85838	-0.822359	4813	993	504	856	522
1	hannae	KK260	KK260_G_02	KK260_G_02_SL_01	garden	KK260_02_SL_1_garden	SL	6N	NA	2	1.64823	1	1	1	1	1	1	forest	50.3395	20.1574	310	-0.231016	0.960715	0.0322593	-0.235643	-0.209862	0.525014	-0.343942	1.16538	0.0345752	-1.104	1.27979	0.536545	-0.928018	-0.000234099	-0.90372	-0.118838	0.477966	-0.627392	2.12675	0.606671	-0.589559	0.85838	-0.822359	8663	170	46	144	45
1	hannae	KK260	KK260_G_02	KK260_G_02_SL_02	garden	KK260_02_SL_2_garden	SL	6N	NA	2	1.64823	1	1	1	1	1	1	forest	50.3395	20.1574	310	-0.231016	0.960715	0.0322593	-0.235643	-0.209862	0.525014	-0.343942	1.16538	0.0345752	-1.104	1.27979	0.536545	-0.928018	-0.000234099	-0.90372	-0.118838	0.477966	-0.627392	2.12675	0.606671	-0.589559	0.85838	-0.822359	8664	223	68	209	72
1	hannae	KK260	KK260_G_02	KK260_G_02_SL_03	garden	KK260_02_SL_3_garden	SL	6N	NA	2	1.64823	1	1	1	1	1	1	forest	50.3395	20.1574	310	-0.231016	0.960715	0.0322593	-0.235643	-0.209862	0.525014	-0.343942	1.16538	0.0345752	-1.104	1.27979	0.536545	-0.928018	-0.000234099	-0.90372	-0.118838	0.477966	-0.627392	2.12675	0.606671	-0.589559	0.85838	-0.822359	8665	187	62	171	49
1	hannae	KK260	KK260_G_03	KK260_G_03_BL_01	garden	KK260_03_BL_1_garden	BL	6N	NA	2	1.64823	1	1	1	1	1	1	forest	50.3395	20.1574	310	-0.231016	0.960715	0.0322593	-0.235643	-0.209862	0.525014	-0.343942	1.16538	0.0345752	-1.104	1.27979	0.536545	-0.928018	-0.000234099	-0.90372	-0.118838	0.477966	-0.627392	2.12675	0.606671	-0.589559	0.85838	-0.822359	378	632	247	575	299
1	hannae	KK260	KK260_G_03	KK260_G_03_BL_02	garden	KK260_03_BL_2_garden	BL	6N	NA	2	1.64823	1	1	1	1	1	1	forest	50.3395	20.1574	310	-0.231016	0.960715	0.0322593	-0.235643	-0.209862	0.525014	-0.343942	1.16538	0.0345752	-1.104	1.27979	0.536545	-0.928018	-0.000234099	-0.90372	-0.118838	0.477966	-0.627392	2.12675	0.606671	-0.589559	0.85838	-0.822359	379	637	310	581	337
1	hannae	KK260	KK260_G_03	KK260_G_03_BL_03	garden	KK260_03_BL_3_garden	BL	6N	NA	2	1.64823	1	1	1	1	1	1	forest	50.3395	20.1574	310	-0.231016	0.960715	0.0322593	-0.235643	-0.209862	0.525014	-0.343942	1.16538	0.0345752	-1.104	1.27979	0.536545	-0.928018	-0.000234099	-0.90372	-0.118838	0.477966	-0.627392	2.12675	0.606671	-0.589559	0.85838	-0.822359	380	295	127	261	145
1	hannae	KK260	KK260_G_03	KK260_G_03_RT_01	garden	KK260_03_1_garden	RT	6N	NA	2	1.64823	1	1	1	1	1	1	forest	50.3395	20.1574	310	-0.231016	0.960715	0.0322593	-0.235643	-0.209862	0.525014	-0.343942	1.16538	0.0345752	-1.104	1.27979	0.536545	-0.928018	-0.000234099	-0.90372	-0.118838	0.477966	-0.627392	2.12675	0.606671	-0.589559	0.85838	-0.822359	4814	585	1102	532	1072
1	hannae	KK260	KK260_G_03	KK260_G_03_RT_01	garden	KK260_03_1_garden	RT	6N	NA	2	1.64823	1	1	1	1	1	1	forest	50.3395	20.1574	310	-0.231016	0.960715	0.0322593	-0.235643	-0.209862	0.525014	-0.343942	1.16538	0.0345752	-1.104	1.27979	0.536545	-0.928018	-0.000234099	-0.90372	-0.118838	0.477966	-0.627392	2.12675	0.606671	-0.589559	0.85838	-0.822359	4815	1076	408	996	348
1	hannae	KK260	KK260_G_03	KK260_G_03_SL_01	garden	KK260_03_SL_1_garden	SL	6N	NA	2	1.64823	1	1	1	1	1	1	forest	50.3395	20.1574	310	-0.231016	0.960715	0.0322593	-0.235643	-0.209862	0.525014	-0.343942	1.16538	0.0345752	-1.104	1.27979	0.536545	-0.928018	-0.000234099	-0.90372	-0.118838	0.477966	-0.627392	2.12675	0.606671	-0.589559	0.85838	-0.822359	8666	164	38	143	43
1	hannae	KK260	KK260_G_03	KK260_G_03_SL_02	garden	KK260_03_SL_2_garden	SL	6N	NA	2	1.64823	1	1	1	1	1	1	forest	50.3395	20.1574	310	-0.231016	0.960715	0.0322593	-0.235643	-0.209862	0.525014	-0.343942	1.16538	0.0345752	-1.104	1.27979	0.536545	-0.928018	-0.000234099	-0.90372	-0.118838	0.477966	-0.627392	2.12675	0.606671	-0.589559	0.85838	-0.822359	8667	205	37	184	31
1	hannae	KK260	KK260_G_03	KK260_G_03_SL_03	garden	KK260_03_SL_3_garden	SL	6N	NA	2	1.64823	1	1	1	1	1	1	forest	50.3395	20.1574	310	-0.231016	0.960715	0.0322593	-0.235643	-0.209862	0.525014	-0.343942	1.16538	0.0345752	-1.104	1.27979	0.536545	-0.928018	-0.000234099	-0.90372	-0.118838	0.477966	-0.627392	2.12675	0.606671	-0.589559	0.85838	-0.822359	8668	328	62	312	51
1	hannae	KK260	KK260_G_03	KK260_G_03_SL_04	garden	KK260_03_SL_4_garden	SL	6N	NA	2	1.64823	1	1	1	1	1	1	forest	50.3395	20.1574	310	-0.231016	0.960715	0.0322593	-0.235643	-0.209862	0.525014	-0.343942	1.16538	0.0345752	-1.104	1.27979	0.536545	-0.928018	-0.000234099	-0.90372	-0.118838	0.477966	-0.627392	2.12675	0.606671	-0.589559	0.85838	-0.822359	8669	154	54	137	45
1	hannae	KK260	KK260_G_04	KK260_G_04_BL_01	garden	KK260_04_BL_1_garden	BL	6N	NA	2	1.64823	1	1	1	1	1	1	forest	50.3395	20.1574	310	-0.231016	0.960715	0.0322593	-0.235643	-0.209862	0.525014	-0.343942	1.16538	0.0345752	-1.104	1.27979	0.536545	-0.928018	-0.000234099	-0.90372	-0.118838	0.477966	-0.627392	2.12675	0.606671	-0.589559	0.85838	-0.822359	381	698	300	620	359
1	hannae	KK260	KK260_G_04	KK260_G_04_BL_02	garden	KK260_04_BL_2_garden	BL	6N	NA	2	1.64823	1	1	1	1	1	1	forest	50.3395	20.1574	310	-0.231016	0.960715	0.0322593	-0.235643	-0.209862	0.525014	-0.343942	1.16538	0.0345752	-1.104	1.27979	0.536545	-0.928018	-0.000234099	-0.90372	-0.118838	0.477966	-0.627392	2.12675	0.606671	-0.589559	0.85838	-0.822359	382	628	276	571	299
1	hannae	KK260	KK260_G_04	KK260_G_04_BL_03	garden	KK260_04_BL_3_garden	BL	6N	NA	2	1.64823	1	1	1	1	1	1	forest	50.3395	20.1574	310	-0.231016	0.960715	0.0322593	-0.235643	-0.209862	0.525014	-0.343942	1.16538	0.0345752	-1.104	1.27979	0.536545	-0.928018	-0.000234099	-0.90372	-0.118838	0.477966	-0.627392	2.12675	0.606671	-0.589559	0.85838	-0.822359	383	587	259	543	284
1	hannae	KK260	KK260_G_04	KK260_G_04_RT_01	garden	KK260_04_1_garden	RT	6N	NA	2	1.64823	1	1	1	1	1	1	forest	50.3395	20.1574	310	-0.231016	0.960715	0.0322593	-0.235643	-0.209862	0.525014	-0.343942	1.16538	0.0345752	-1.104	1.27979	0.536545	-0.928018	-0.000234099	-0.90372	-0.118838	0.477966	-0.627392	2.12675	0.606671	-0.589559	0.85838	-0.822359	4816	641	1071	586	1069
1	hannae	KK260	KK260_G_04	KK260_G_04_RT_01	garden	KK260_04_1_garden	RT	6N	NA	2	1.64823	1	1	1	1	1	1	forest	50.3395	20.1574	310	-0.231016	0.960715	0.0322593	-0.235643	-0.209862	0.525014	-0.343942	1.16538	0.0345752	-1.104	1.27979	0.536545	-0.928018	-0.000234099	-0.90372	-0.118838	0.477966	-0.627392	2.12675	0.606671	-0.589559	0.85838	-0.822359	4817	1196	348	1097	338
1	hannae	KK260	KK260_G_04	KK260_G_04_SL_01	garden	KK260_04_SL_1_garden	SL	6N	NA	2	1.64823	1	1	1	1	1	1	forest	50.3395	20.1574	310	-0.231016	0.960715	0.0322593	-0.235643	-0.209862	0.525014	-0.343942	1.16538	0.0345752	-1.104	1.27979	0.536545	-0.928018	-0.000234099	-0.90372	-0.118838	0.477966	-0.627392	2.12675	0.606671	-0.589559	0.85838	-0.822359	8670	217	53	204	47
1	hannae	KK260	KK260_G_04	KK260_G_04_SL_02	garden	KK260_04_SL_2_garden	SL	6N	NA	2	1.64823	1	1	1	1	1	1	forest	50.3395	20.1574	310	-0.231016	0.960715	0.0322593	-0.235643	-0.209862	0.525014	-0.343942	1.16538	0.0345752	-1.104	1.27979	0.536545	-0.928018	-0.000234099	-0.90372	-0.118838	0.477966	-0.627392	2.12675	0.606671	-0.589559	0.85838	-0.822359	8671	211	44	188	44
1	hannae	KK260	KK260_G_04	KK260_G_04_SL_03	garden	KK260_04_SL_3_garden	SL	6N	NA	2	1.64823	1	1	1	1	1	1	forest	50.3395	20.1574	310	-0.231016	0.960715	0.0322593	-0.235643	-0.209862	0.525014	-0.343942	1.16538	0.0345752	-1.104	1.27979	0.536545	-0.928018	-0.000234099	-0.90372	-0.118838	0.477966	-0.627392	2.12675	0.606671	-0.589559	0.85838	-0.822359	8672	64	50	52	62
1	hannae	KK260	KK260_G_05	KK260_G_05_BL_01	garden	KK260_05_BL_1_garden	BL	6N	NA	2	1.64823	1	1	1	1	1	1	forest	50.3395	20.1574	310	-0.231016	0.960715	0.0322593	-0.235643	-0.209862	0.525014	-0.343942	1.16538	0.0345752	-1.104	1.27979	0.536545	-0.928018	-0.000234099	-0.90372	-0.118838	0.477966	-0.627392	2.12675	0.606671	-0.589559	0.85838	-0.822359	384	625	334	562	369
1	hannae	KK260	KK260_G_05	KK260_G_05_BL_02	garden	KK260_05_BL_2_garden	BL	6N	NA	2	1.64823	1	1	1	1	1	1	forest	50.3395	20.1574	310	-0.231016	0.960715	0.0322593	-0.235643	-0.209862	0.525014	-0.343942	1.16538	0.0345752	-1.104	1.27979	0.536545	-0.928018	-0.000234099	-0.90372	-0.118838	0.477966	-0.627392	2.12675	0.606671	-0.589559	0.85838	-0.822359	385	838	385	792	440
1	hannae	KK260	KK260_G_05	KK260_G_05_BL_03	garden	KK260_05_BL_3_garden	BL	6N	NA	2	1.64823	1	1	1	1	1	1	forest	50.3395	20.1574	310	-0.231016	0.960715	0.0322593	-0.235643	-0.209862	0.525014	-0.343942	1.16538	0.0345752	-1.104	1.27979	0.536545	-0.928018	-0.000234099	-0.90372	-0.118838	0.477966	-0.627392	2.12675	0.606671	-0.589559	0.85838	-0.822359	386	879	375	797	451
1	hannae	KK260	KK260_G_05	KK260_G_05_SL_01	garden	KK260_05_SL_1_garden	SL	6N	NA	2	1.64823	1	1	1	1	1	1	forest	50.3395	20.1574	310	-0.231016	0.960715	0.0322593	-0.235643	-0.209862	0.525014	-0.343942	1.16538	0.0345752	-1.104	1.27979	0.536545	-0.928018	-0.000234099	-0.90372	-0.118838	0.477966	-0.627392	2.12675	0.606671	-0.589559	0.85838	-0.822359	8673	200	63	183	64
1	hannae	KK260	KK260_G_06	KK260_G_06_BL_01	garden	KK260_06_BL_1_garden	BL	6N	NA	2	1.64823	1	1	1	1	1	1	forest	50.3395	20.1574	310	-0.231016	0.960715	0.0322593	-0.235643	-0.209862	0.525014	-0.343942	1.16538	0.0345752	-1.104	1.27979	0.536545	-0.928018	-0.000234099	-0.90372	-0.118838	0.477966	-0.627392	2.12675	0.606671	-0.589559	0.85838	-0.822359	387	458	178	401	186
1	hannae	KK260	KK260_G_06	KK260_G_06_BL_02	garden	KK260_06_BL_2_garden	BL	6N	NA	2	1.64823	1	1	1	1	1	1	forest	50.3395	20.1574	310	-0.231016	0.960715	0.0322593	-0.235643	-0.209862	0.525014	-0.343942	1.16538	0.0345752	-1.104	1.27979	0.536545	-0.928018	-0.000234099	-0.90372	-0.118838	0.477966	-0.627392	2.12675	0.606671	-0.589559	0.85838	-0.822359	388	594	263	543	268
1	hannae	KK260	KK260_G_06	KK260_G_06_RT_01	garden	KK260_06_1_garden	RT	6N	NA	2	1.64823	1	1	1	1	1	1	forest	50.3395	20.1574	310	-0.231016	0.960715	0.0322593	-0.235643	-0.209862	0.525014	-0.343942	1.16538	0.0345752	-1.104	1.27979	0.536545	-0.928018	-0.000234099	-0.90372	-0.118838	0.477966	-0.627392	2.12675	0.606671	-0.589559	0.85838	-0.822359	4818	838	1315	752	1284
1	hannae	KK260	KK260_G_06	KK260_G_06_RT_01	garden	KK260_06_1_garden	RT	6N	NA	2	1.64823	1	1	1	1	1	1	forest	50.3395	20.1574	310	-0.231016	0.960715	0.0322593	-0.235643	-0.209862	0.525014	-0.343942	1.16538	0.0345752	-1.104	1.27979	0.536545	-0.928018	-0.000234099	-0.90372	-0.118838	0.477966	-0.627392	2.12675	0.606671	-0.589559	0.85838	-0.822359	4819	1548	779	1458	727
1	hannae	KK260	KK260_G_06	KK260_G_06_RT_02	garden	KK260_06_2_garden	RT	6N	NA	2	1.64823	1	1	1	1	1	1	forest	50.3395	20.1574	310	-0.231016	0.960715	0.0322593	-0.235643	-0.209862	0.525014	-0.343942	1.16538	0.0345752	-1.104	1.27979	0.536545	-0.928018	-0.000234099	-0.90372	-0.118838	0.477966	-0.627392	2.12675	0.606671	-0.589559	0.85838	-0.822359	4820	595	1076	543	1040
1	hannae	KK260	KK260_G_06	KK260_G_06_RT_02	garden	KK260_06_2_garden	RT	6N	NA	2	1.64823	1	1	1	1	1	1	forest	50.3395	20.1574	310	-0.231016	0.960715	0.0322593	-0.235643	-0.209862	0.525014	-0.343942	1.16538	0.0345752	-1.104	1.27979	0.536545	-0.928018	-0.000234099	-0.90372	-0.118838	0.477966	-0.627392	2.12675	0.606671	-0.589559	0.85838	-0.822359	4821	1082	346	1019	289
1	hannae	KK260	KK260_G_06	KK260_G_06_SL_01	garden	KK260_06_SL_1_garden	SL	6N	NA	2	1.64823	1	1	1	1	1	1	forest	50.3395	20.1574	310	-0.231016	0.960715	0.0322593	-0.235643	-0.209862	0.525014	-0.343942	1.16538	0.0345752	-1.104	1.27979	0.536545	-0.928018	-0.000234099	-0.90372	-0.118838	0.477966	-0.627392	2.12675	0.606671	-0.589559	0.85838	-0.822359	8674	292	49	286	37
1	hannae	KK260	KK260_G_06	KK260_G_06_SL_02	garden	KK260_06_SL_2_garden	SL	6N	NA	2	1.64823	1	1	1	1	1	1	forest	50.3395	20.1574	310	-0.231016	0.960715	0.0322593	-0.235643	-0.209862	0.525014	-0.343942	1.16538	0.0345752	-1.104	1.27979	0.536545	-0.928018	-0.000234099	-0.90372	-0.118838	0.477966	-0.627392	2.12675	0.606671	-0.589559	0.85838	-0.822359	8675	131	52	108	51
1	hannae	KK260	KK260_G_06	KK260_G_06_SL_03	garden	KK260_06_SL_3_garden	SL	6N	NA	2	1.64823	1	1	1	1	1	1	forest	50.3395	20.1574	310	-0.231016	0.960715	0.0322593	-0.235643	-0.209862	0.525014	-0.343942	1.16538	0.0345752	-1.104	1.27979	0.536545	-0.928018	-0.000234099	-0.90372	-0.118838	0.477966	-0.627392	2.12675	0.606671	-0.589559	0.85838	-0.822359	8676	138	35	120	29
1	hannae	KK260	KK260_H_01	KK260_H_01_BL_01	herbar	KK260_L01_BL_herbar	BL	6N	NA	2	1.64823	1	1	1	1	1	1	forest	50.3395	20.1574	310	-0.231016	0.960715	0.0322593	-0.235643	-0.209862	0.525014	-0.343942	1.16538	0.0345752	-1.104	1.27979	0.536545	-0.928018	-0.000234099	-0.90372	-0.118838	0.477966	-0.627392	2.12675	0.606671	-0.589559	0.85838	-0.822359	389	772	423	703	477
1	hannae	KK260	KK260_H_01	KK260_H_01_RT_01	herbar	KK260_L01_herbar	RT	6N	NA	2	1.64823	1	1	1	1	1	1	forest	50.3395	20.1574	310	-0.231016	0.960715	0.0322593	-0.235643	-0.209862	0.525014	-0.343942	1.16538	0.0345752	-1.104	1.27979	0.536545	-0.928018	-0.000234099	-0.90372	-0.118838	0.477966	-0.627392	2.12675	0.606671	-0.589559	0.85838	-0.822359	4822	531	1240	474	1248
1	hannae	KK260	KK260_H_01	KK260_H_01_SL_01	herbar	KK260_L01_SL_herbar	SL	6N	NA	2	1.64823	1	1	1	1	1	1	forest	50.3395	20.1574	310	-0.231016	0.960715	0.0322593	-0.235643	-0.209862	0.525014	-0.343942	1.16538	0.0345752	-1.104	1.27979	0.536545	-0.928018	-0.000234099	-0.90372	-0.118838	0.477966	-0.627392	2.12675	0.606671	-0.589559	0.85838	-0.822359	8677	739	694	724	696
1	hannae	KK260	KK260_H_02	KK260_H_02_BL_01	herbar	KK260_L02_BL_herbar	BL	6N	NA	2	1.64823	1	1	1	1	1	1	forest	50.3395	20.1574	310	-0.231016	0.960715	0.0322593	-0.235643	-0.209862	0.525014	-0.343942	1.16538	0.0345752	-1.104	1.27979	0.536545	-0.928018	-0.000234099	-0.90372	-0.118838	0.477966	-0.627392	2.12675	0.606671	-0.589559	0.85838	-0.822359	390	887	576	830	685
1	hannae	KK260	KK260_H_02	KK260_H_02_RT_01	herbar	KK260_L02_herbar	RT	6N	NA	2	1.64823	1	1	1	1	1	1	forest	50.3395	20.1574	310	-0.231016	0.960715	0.0322593	-0.235643	-0.209862	0.525014	-0.343942	1.16538	0.0345752	-1.104	1.27979	0.536545	-0.928018	-0.000234099	-0.90372	-0.118838	0.477966	-0.627392	2.12675	0.606671	-0.589559	0.85838	-0.822359	4823	530	1269	465	1256
1	hannae	KK260	KK260_H_02	KK260_H_02_SL_01	herbar	KK260_L02_SL_herbar	SL	6N	NA	2	1.64823	1	1	1	1	1	1	forest	50.3395	20.1574	310	-0.231016	0.960715	0.0322593	-0.235643	-0.209862	0.525014	-0.343942	1.16538	0.0345752	-1.104	1.27979	0.536545	-0.928018	-0.000234099	-0.90372	-0.118838	0.477966	-0.627392	2.12675	0.606671	-0.589559	0.85838	-0.822359	8678	1079	867	1069	862
1	hungaricus	LH038	LH038_G_01	LH038_G_01_RT_01	garden	LH038_01_1	RT	4N	2_apomictic_obligate_asexual	5	2.11895	1	1	1	1	1	1	forest	48.1448	20.6226	240	-0.641915	1.03678	-0.155608	0.68186	0.579281	1.91313	0.411126	1.48704	1.47298	-0.678229	2.00337	0.718371	-0.490755	1.17494	-0.299904	-0.676096	-0.156122	-0.84058	1.25687	-0.395534	-0.927	-0.266662	-1.06907	4977	1007	497	778	540
1	hungaricus	LH038	LH038_G_01	LH038_G_01_RT_02	garden	LH038_01_2	RT	4N	2_apomictic_obligate_asexual	5	2.11895	1	1	1	1	1	1	forest	48.1448	20.6226	240	-0.641915	1.03678	-0.155608	0.68186	0.579281	1.91313	0.411126	1.48704	1.47298	-0.678229	2.00337	0.718371	-0.490755	1.17494	-0.299904	-0.676096	-0.156122	-0.84058	1.25687	-0.395534	-0.927	-0.266662	-1.06907	4978	986	589	793	520
1	hungaricus	LH038	LH038_G_01	LH038_G_01_SL_01	garden	LH038_01_SL_1	SL	4N	2_apomictic_obligate_asexual	5	2.11895	1	1	1	1	1	1	forest	48.1448	20.6226	240	-0.641915	1.03678	-0.155608	0.68186	0.579281	1.91313	0.411126	1.48704	1.47298	-0.678229	2.00337	0.718371	-0.490755	1.17494	-0.299904	-0.676096	-0.156122	-0.84058	1.25687	-0.395534	-0.927	-0.266662	-1.06907	8819	107	24	100	25
1	hungaricus	LH038	LH038_G_01	LH038_G_01_SL_02	garden	LH038_01_SL_2	SL	4N	2_apomictic_obligate_asexual	5	2.11895	1	1	1	1	1	1	forest	48.1448	20.6226	240	-0.641915	1.03678	-0.155608	0.68186	0.579281	1.91313	0.411126	1.48704	1.47298	-0.678229	2.00337	0.718371	-0.490755	1.17494	-0.299904	-0.676096	-0.156122	-0.84058	1.25687	-0.395534	-0.927	-0.266662	-1.06907	8820	135	22	130	18
1	hungaricus	LH038	LH038_G_01	LH038_G_01_SL_03	garden	LH038_01_SL_3	SL	4N	2_apomictic_obligate_asexual	5	2.11895	1	1	1	1	1	1	forest	48.1448	20.6226	240	-0.641915	1.03678	-0.155608	0.68186	0.579281	1.91313	0.411126	1.48704	1.47298	-0.678229	2.00337	0.718371	-0.490755	1.17494	-0.299904	-0.676096	-0.156122	-0.84058	1.25687	-0.395534	-0.927	-0.266662	-1.06907	8821	180	10	174	6
1	hungaricus	LH038	LH038_G_02	LH038_G_02_RT_01	garden	LH038_02_1	RT	4N	2_apomictic_obligate_asexual	5	2.11895	1	1	1	1	1	1	forest	48.1448	20.6226	240	-0.641915	1.03678	-0.155608	0.68186	0.579281	1.91313	0.411126	1.48704	1.47298	-0.678229	2.00337	0.718371	-0.490755	1.17494	-0.299904	-0.676096	-0.156122	-0.84058	1.25687	-0.395534	-0.927	-0.266662	-1.06907	4979	1325	284	1233	177
1	hungaricus	LH038	LH038_G_04	LH038_G_04_BL_01	garden	LH038_04_BL_1_garden	BL	4N	2_apomictic_obligate_asexual	5	2.11895	1	1	1	1	1	1	forest	48.1448	20.6226	240	-0.641915	1.03678	-0.155608	0.68186	0.579281	1.91313	0.411126	1.48704	1.47298	-0.678229	2.00337	0.718371	-0.490755	1.17494	-0.299904	-0.676096	-0.156122	-0.84058	1.25687	-0.395534	-0.927	-0.266662	-1.06907	551	351	93	300	113
1	hungaricus	LH038	LH038_G_04	LH038_G_04_BL_02	garden	LH038_04_BL_2_garden	BL	4N	2_apomictic_obligate_asexual	5	2.11895	1	1	1	1	1	1	forest	48.1448	20.6226	240	-0.641915	1.03678	-0.155608	0.68186	0.579281	1.91313	0.411126	1.48704	1.47298	-0.678229	2.00337	0.718371	-0.490755	1.17494	-0.299904	-0.676096	-0.156122	-0.84058	1.25687	-0.395534	-0.927	-0.266662	-1.06907	552	280	182	260	196
1	hungaricus	LH038	LH038_G_04	LH038_G_04_RT_01	garden	LH038_04_1	RT	4N	2_apomictic_obligate_asexual	5	2.11895	1	1	1	1	1	1	forest	48.1448	20.6226	240	-0.641915	1.03678	-0.155608	0.68186	0.579281	1.91313	0.411126	1.48704	1.47298	-0.678229	2.00337	0.718371	-0.490755	1.17494	-0.299904	-0.676096	-0.156122	-0.84058	1.25687	-0.395534	-0.927	-0.266662	-1.06907	4980	1398	351	1226	379
1	hungaricus	LH038	LH038_G_04	LH038_G_04_RT_02	garden	LH038_04_2	RT	4N	2_apomictic_obligate_asexual	5	2.11895	1	1	1	1	1	1	forest	48.1448	20.6226	240	-0.641915	1.03678	-0.155608	0.68186	0.579281	1.91313	0.411126	1.48704	1.47298	-0.678229	2.00337	0.718371	-0.490755	1.17494	-0.299904	-0.676096	-0.156122	-0.84058	1.25687	-0.395534	-0.927	-0.266662	-1.06907	4981	1226	563	1046	520
1	hungaricus	LH038	LH038_G_05	LH038_G_05_RT_01	garden	LH038_05_1	RT	4N	2_apomictic_obligate_asexual	5	2.11895	1	1	1	1	1	1	forest	48.1448	20.6226	240	-0.641915	1.03678	-0.155608	0.68186	0.579281	1.91313	0.411126	1.48704	1.47298	-0.678229	2.00337	0.718371	-0.490755	1.17494	-0.299904	-0.676096	-0.156122	-0.84058	1.25687	-0.395534	-0.927	-0.266662	-1.06907	4982	1130	632	1031	621
1	hungaricus	LH038	LH038_G_05	LH038_G_05_RT_02	garden	LH038_05_2	RT	4N	2_apomictic_obligate_asexual	5	2.11895	1	1	1	1	1	1	forest	48.1448	20.6226	240	-0.641915	1.03678	-0.155608	0.68186	0.579281	1.91313	0.411126	1.48704	1.47298	-0.678229	2.00337	0.718371	-0.490755	1.17494	-0.299904	-0.676096	-0.156122	-0.84058	1.25687	-0.395534	-0.927	-0.266662	-1.06907	4983	1505	299	1376	137
1	hungaricus	LH038	LH038_G_06	LH038_G_06_BL_02	garden	LH038_06_BL_2_garden	BL	4N	2_apomictic_obligate_asexual	5	2.11895	1	1	1	1	1	1	forest	48.1448	20.6226	240	-0.641915	1.03678	-0.155608	0.68186	0.579281	1.91313	0.411126	1.48704	1.47298	-0.678229	2.00337	0.718371	-0.490755	1.17494	-0.299904	-0.676096	-0.156122	-0.84058	1.25687	-0.395534	-0.927	-0.266662	-1.06907	553	232	91	206	112
1	hungaricus	LH038	LH038_G_06	LH038_G_06_RT_01	garden	LH038_06_1	RT	4N	2_apomictic_obligate_asexual	5	2.11895	1	1	1	1	1	1	forest	48.1448	20.6226	240	-0.641915	1.03678	-0.155608	0.68186	0.579281	1.91313	0.411126	1.48704	1.47298	-0.678229	2.00337	0.718371	-0.490755	1.17494	-0.299904	-0.676096	-0.156122	-0.84058	1.25687	-0.395534	-0.927	-0.266662	-1.06907	4984	1591	321	1468	239
1	hungaricus	LH038	LH038_G_06	LH038_G_06_RT_02	garden	LH038_06_2	RT	4N	2_apomictic_obligate_asexual	5	2.11895	1	1	1	1	1	1	forest	48.1448	20.6226	240	-0.641915	1.03678	-0.155608	0.68186	0.579281	1.91313	0.411126	1.48704	1.47298	-0.678229	2.00337	0.718371	-0.490755	1.17494	-0.299904	-0.676096	-0.156122	-0.84058	1.25687	-0.395534	-0.927	-0.266662	-1.06907	4985	1387	630	1254	591
1	hungaricus	LH038	LH038_G_07	LH038_G_07_SL_01	garden	LH038_07_SL_1	SL	4N	2_apomictic_obligate_asexual	5	2.11895	1	1	1	1	1	1	forest	48.1448	20.6226	240	-0.641915	1.03678	-0.155608	0.68186	0.579281	1.91313	0.411126	1.48704	1.47298	-0.678229	2.00337	0.718371	-0.490755	1.17494	-0.299904	-0.676096	-0.156122	-0.84058	1.25687	-0.395534	-0.927	-0.266662	-1.06907	8822	74	17	70	17
1	hungaricus	LH038	LH038_G_07	LH038_G_07_SL_02	garden	LH038_07_SL_2	SL	4N	2_apomictic_obligate_asexual	5	2.11895	1	1	1	1	1	1	forest	48.1448	20.6226	240	-0.641915	1.03678	-0.155608	0.68186	0.579281	1.91313	0.411126	1.48704	1.47298	-0.678229	2.00337	0.718371	-0.490755	1.17494	-0.299904	-0.676096	-0.156122	-0.84058	1.25687	-0.395534	-0.927	-0.266662	-1.06907	8823	53	24	40	34
1	hungaricus	LH038	LH038_G_07	LH038_G_07_SL_03	garden	LH038_07_SL_3	SL	4N	2_apomictic_obligate_asexual	5	2.11895	1	1	1	1	1	1	forest	48.1448	20.6226	240	-0.641915	1.03678	-0.155608	0.68186	0.579281	1.91313	0.411126	1.48704	1.47298	-0.678229	2.00337	0.718371	-0.490755	1.17494	-0.299904	-0.676096	-0.156122	-0.84058	1.25687	-0.395534	-0.927	-0.266662	-1.06907	8824	107	29	102	32
1	hungaricus	LH038	LH038_G_07	LH038_G_07_SL_04	garden	LH038_07_SL_4	SL	4N	2_apomictic_obligate_asexual	5	2.11895	1	1	1	1	1	1	forest	48.1448	20.6226	240	-0.641915	1.03678	-0.155608	0.68186	0.579281	1.91313	0.411126	1.48704	1.47298	-0.678229	2.00337	0.718371	-0.490755	1.17494	-0.299904	-0.676096	-0.156122	-0.84058	1.25687	-0.395534	-0.927	-0.266662	-1.06907	8825	59	21	52	25
1	hungaricus	LH038	LH038_G_08	LH038_G_08_BL_01	garden	LH038_08_BL_1_garden	BL	4N	2_apomictic_obligate_asexual	5	2.11895	1	1	1	1	1	1	forest	48.1448	20.6226	240	-0.641915	1.03678	-0.155608	0.68186	0.579281	1.91313	0.411126	1.48704	1.47298	-0.678229	2.00337	0.718371	-0.490755	1.17494	-0.299904	-0.676096	-0.156122	-0.84058	1.25687	-0.395534	-0.927	-0.266662	-1.06907	554	299	229	267	231
1	hungaricus	LH038	LH038_G_08	LH038_G_08_BL_02	garden	LH038_08_BL_2_garden	BL	4N	2_apomictic_obligate_asexual	5	2.11895	1	1	1	1	1	1	forest	48.1448	20.6226	240	-0.641915	1.03678	-0.155608	0.68186	0.579281	1.91313	0.411126	1.48704	1.47298	-0.678229	2.00337	0.718371	-0.490755	1.17494	-0.299904	-0.676096	-0.156122	-0.84058	1.25687	-0.395534	-0.927	-0.266662	-1.06907	555	433	274	374	307
1	hungaricus	LH038	LH038_G_08	LH038_G_08_BL_03	garden	LH038_08_BL_3_garden	BL	4N	2_apomictic_obligate_asexual	5	2.11895	1	1	1	1	1	1	forest	48.1448	20.6226	240	-0.641915	1.03678	-0.155608	0.68186	0.579281	1.91313	0.411126	1.48704	1.47298	-0.678229	2.00337	0.718371	-0.490755	1.17494	-0.299904	-0.676096	-0.156122	-0.84058	1.25687	-0.395534	-0.927	-0.266662	-1.06907	556	365	200	323	213
1	hungaricus	LH038	LH038_G_08	LH038_G_08_SL_01	garden	LH038_08_SL_1	SL	4N	2_apomictic_obligate_asexual	5	2.11895	1	1	1	1	1	1	forest	48.1448	20.6226	240	-0.641915	1.03678	-0.155608	0.68186	0.579281	1.91313	0.411126	1.48704	1.47298	-0.678229	2.00337	0.718371	-0.490755	1.17494	-0.299904	-0.676096	-0.156122	-0.84058	1.25687	-0.395534	-0.927	-0.266662	-1.06907	8826	208	15	203	12
1	hungaricus	LH041	LH041_G_02	LH041_G_02_BL_01	garden	LH041_02_BL_1	BL	4N_5N	2_apomictic_obligate_asexual	3	1.82944	1	1	1	NA	NA	NA	meadow_edge	49.0866	19.3976	513	-0.465602	0.836508	0.577075	0.00279115	-0.50579	1.54297	0.411126	0.836635	0.0345752	-1.2814	1.48078	0.324414	-0.953739	-0.411545	-0.943975	0.776757	1.6616	0.296426	1.40185	1.3811	0.175308	1.66651	-0.0616769	582	430	215	389	220
1	hungaricus	LH041	LH041_G_02	LH041_G_02_BL_02	garden	LH041_02_BL_2	BL	4N_5N	2_apomictic_obligate_asexual	3	1.82944	1	1	1	NA	NA	NA	meadow_edge	49.0866	19.3976	513	-0.465602	0.836508	0.577075	0.00279115	-0.50579	1.54297	0.411126	0.836635	0.0345752	-1.2814	1.48078	0.324414	-0.953739	-0.411545	-0.943975	0.776757	1.6616	0.296426	1.40185	1.3811	0.175308	1.66651	-0.0616769	583	435	178	395	211
1	hungaricus	LH041	LH041_G_02	LH041_G_02_BL_03	garden	LH041_02_BL_3	BL	4N_5N	2_apomictic_obligate_asexual	3	1.82944	1	1	1	NA	NA	NA	meadow_edge	49.0866	19.3976	513	-0.465602	0.836508	0.577075	0.00279115	-0.50579	1.54297	0.411126	0.836635	0.0345752	-1.2814	1.48078	0.324414	-0.953739	-0.411545	-0.943975	0.776757	1.6616	0.296426	1.40185	1.3811	0.175308	1.66651	-0.0616769	584	386	219	356	235
1	hungaricus	LH041	LH041_G_02	LH041_G_02_BL_04	garden	LH041_02_BL_4	BL	4N_5N	2_apomictic_obligate_asexual	3	1.82944	1	1	1	NA	NA	NA	meadow_edge	49.0866	19.3976	513	-0.465602	0.836508	0.577075	0.00279115	-0.50579	1.54297	0.411126	0.836635	0.0345752	-1.2814	1.48078	0.324414	-0.953739	-0.411545	-0.943975	0.776757	1.6616	0.296426	1.40185	1.3811	0.175308	1.66651	-0.0616769	585	374	214	331	253
1	hungaricus	LH041	LH041_G_02	LH041_G_02_RT_01	garden	LH041_02_1	RT	4N_5N	2_apomictic_obligate_asexual	3	1.82944	1	1	1	NA	NA	NA	meadow_edge	49.0866	19.3976	513	-0.465602	0.836508	0.577075	0.00279115	-0.50579	1.54297	0.411126	0.836635	0.0345752	-1.2814	1.48078	0.324414	-0.953739	-0.411545	-0.943975	0.776757	1.6616	0.296426	1.40185	1.3811	0.175308	1.66651	-0.0616769	5002	992	685	821	670
1	hungaricus	LH041	LH041_G_02	LH041_G_02_RT_02	garden	LH041_02_2	RT	4N_5N	2_apomictic_obligate_asexual	3	1.82944	1	1	1	NA	NA	NA	meadow_edge	49.0866	19.3976	513	-0.465602	0.836508	0.577075	0.00279115	-0.50579	1.54297	0.411126	0.836635	0.0345752	-1.2814	1.48078	0.324414	-0.953739	-0.411545	-0.943975	0.776757	1.6616	0.296426	1.40185	1.3811	0.175308	1.66651	-0.0616769	5003	1151	657	1033	687
1	hungaricus	LH041	LH041_G_02	LH041_G_02_SL_01	garden	LH041_02_SL_1	SL	4N_5N	2_apomictic_obligate_asexual	3	1.82944	1	1	1	NA	NA	NA	meadow_edge	49.0866	19.3976	513	-0.465602	0.836508	0.577075	0.00279115	-0.50579	1.54297	0.411126	0.836635	0.0345752	-1.2814	1.48078	0.324414	-0.953739	-0.411545	-0.943975	0.776757	1.6616	0.296426	1.40185	1.3811	0.175308	1.66651	-0.0616769	8837	164	52	159	49
1	hungaricus	LH041	LH041_G_02	LH041_G_02_SL_02	garden	LH041_02_SL_2	SL	4N_5N	2_apomictic_obligate_asexual	3	1.82944	1	1	1	NA	NA	NA	meadow_edge	49.0866	19.3976	513	-0.465602	0.836508	0.577075	0.00279115	-0.50579	1.54297	0.411126	0.836635	0.0345752	-1.2814	1.48078	0.324414	-0.953739	-0.411545	-0.943975	0.776757	1.6616	0.296426	1.40185	1.3811	0.175308	1.66651	-0.0616769	8838	203	145	195	143
1	hungaricus	LH041	LH041_G_03	LH041_G_03_BL_01	garden	LH041_03_BL_1	BL	4N_5N	2_apomictic_obligate_asexual	3	1.82944	1	1	1	NA	NA	NA	meadow_edge	49.0866	19.3976	513	-0.465602	0.836508	0.577075	0.00279115	-0.50579	1.54297	0.411126	0.836635	0.0345752	-1.2814	1.48078	0.324414	-0.953739	-0.411545	-0.943975	0.776757	1.6616	0.296426	1.40185	1.3811	0.175308	1.66651	-0.0616769	586	372	184	344	227
1	hungaricus	LH041	LH041_G_03	LH041_G_03_BL_02	garden	LH041_03_BL_2	BL	4N_5N	2_apomictic_obligate_asexual	3	1.82944	1	1	1	NA	NA	NA	meadow_edge	49.0866	19.3976	513	-0.465602	0.836508	0.577075	0.00279115	-0.50579	1.54297	0.411126	0.836635	0.0345752	-1.2814	1.48078	0.324414	-0.953739	-0.411545	-0.943975	0.776757	1.6616	0.296426	1.40185	1.3811	0.175308	1.66651	-0.0616769	587	317	319	270	358
1	hungaricus	LH041	LH041_G_03	LH041_G_03_BL_03	garden	LH041_03_BL_3	BL	4N_5N	2_apomictic_obligate_asexual	3	1.82944	1	1	1	NA	NA	NA	meadow_edge	49.0866	19.3976	513	-0.465602	0.836508	0.577075	0.00279115	-0.50579	1.54297	0.411126	0.836635	0.0345752	-1.2814	1.48078	0.324414	-0.953739	-0.411545	-0.943975	0.776757	1.6616	0.296426	1.40185	1.3811	0.175308	1.66651	-0.0616769	588	421	190	382	221
1	hungaricus	LH041	LH041_G_03	LH041_G_03_RT_01	garden	LH041_03_1	RT	4N_5N	2_apomictic_obligate_asexual	3	1.82944	1	1	1	NA	NA	NA	meadow_edge	49.0866	19.3976	513	-0.465602	0.836508	0.577075	0.00279115	-0.50579	1.54297	0.411126	0.836635	0.0345752	-1.2814	1.48078	0.324414	-0.953739	-0.411545	-0.943975	0.776757	1.6616	0.296426	1.40185	1.3811	0.175308	1.66651	-0.0616769	5004	1055	432	960	432
1	hungaricus	LH041	LH041_G_03	LH041_G_03_RT_02	garden	LH041_03_2	RT	4N_5N	2_apomictic_obligate_asexual	3	1.82944	1	1	1	NA	NA	NA	meadow_edge	49.0866	19.3976	513	-0.465602	0.836508	0.577075	0.00279115	-0.50579	1.54297	0.411126	0.836635	0.0345752	-1.2814	1.48078	0.324414	-0.953739	-0.411545	-0.943975	0.776757	1.6616	0.296426	1.40185	1.3811	0.175308	1.66651	-0.0616769	5005	1166	385	1080	404
1	hungaricus	LH041	LH041_G_03	LH041_G_03_SL_01	garden	LH041_03_SL_1	SL	4N_5N	2_apomictic_obligate_asexual	3	1.82944	1	1	1	NA	NA	NA	meadow_edge	49.0866	19.3976	513	-0.465602	0.836508	0.577075	0.00279115	-0.50579	1.54297	0.411126	0.836635	0.0345752	-1.2814	1.48078	0.324414	-0.953739	-0.411545	-0.943975	0.776757	1.6616	0.296426	1.40185	1.3811	0.175308	1.66651	-0.0616769	8839	135	169	119	168
1	hungaricus	LH041	LH041_G_03	LH041_G_03_SL_02	garden	LH041_03_SL_2	SL	4N_5N	2_apomictic_obligate_asexual	3	1.82944	1	1	1	NA	NA	NA	meadow_edge	49.0866	19.3976	513	-0.465602	0.836508	0.577075	0.00279115	-0.50579	1.54297	0.411126	0.836635	0.0345752	-1.2814	1.48078	0.324414	-0.953739	-0.411545	-0.943975	0.776757	1.6616	0.296426	1.40185	1.3811	0.175308	1.66651	-0.0616769	8840	127	131	120	128
1	hungaricus	LH041	LH041_G_03	LH041_G_03_SL_03	garden	LH041_03_SL_3	SL	4N_5N	2_apomictic_obligate_asexual	3	1.82944	1	1	1	NA	NA	NA	meadow_edge	49.0866	19.3976	513	-0.465602	0.836508	0.577075	0.00279115	-0.50579	1.54297	0.411126	0.836635	0.0345752	-1.2814	1.48078	0.324414	-0.953739	-0.411545	-0.943975	0.776757	1.6616	0.296426	1.40185	1.3811	0.175308	1.66651	-0.0616769	8841	201	101	198	98
1	hungaricus	LH041	LH041_G_04	LH041_G_04_BL_01	garden	LH041_04_BL_1	BL	4N_5N	2_apomictic_obligate_asexual	3	1.82944	1	1	1	NA	NA	NA	meadow_edge	49.0866	19.3976	513	-0.465602	0.836508	0.577075	0.00279115	-0.50579	1.54297	0.411126	0.836635	0.0345752	-1.2814	1.48078	0.324414	-0.953739	-0.411545	-0.943975	0.776757	1.6616	0.296426	1.40185	1.3811	0.175308	1.66651	-0.0616769	589	385	241	342	268
1	hungaricus	LH041	LH041_G_04	LH041_G_04_BL_02	garden	LH041_04_BL_2	BL	4N_5N	2_apomictic_obligate_asexual	3	1.82944	1	1	1	NA	NA	NA	meadow_edge	49.0866	19.3976	513	-0.465602	0.836508	0.577075	0.00279115	-0.50579	1.54297	0.411126	0.836635	0.0345752	-1.2814	1.48078	0.324414	-0.953739	-0.411545	-0.943975	0.776757	1.6616	0.296426	1.40185	1.3811	0.175308	1.66651	-0.0616769	590	376	261	336	298
1	hungaricus	LH041	LH041_G_04	LH041_G_04_BL_03	garden	LH041_04_BL_3	BL	4N_5N	2_apomictic_obligate_asexual	3	1.82944	1	1	1	NA	NA	NA	meadow_edge	49.0866	19.3976	513	-0.465602	0.836508	0.577075	0.00279115	-0.50579	1.54297	0.411126	0.836635	0.0345752	-1.2814	1.48078	0.324414	-0.953739	-0.411545	-0.943975	0.776757	1.6616	0.296426	1.40185	1.3811	0.175308	1.66651	-0.0616769	591	331	359	294	382
1	hungaricus	LH041	LH041_G_04	LH041_G_04_RT_01	garden	LH041_04_1	RT	4N_5N	2_apomictic_obligate_asexual	3	1.82944	1	1	1	NA	NA	NA	meadow_edge	49.0866	19.3976	513	-0.465602	0.836508	0.577075	0.00279115	-0.50579	1.54297	0.411126	0.836635	0.0345752	-1.2814	1.48078	0.324414	-0.953739	-0.411545	-0.943975	0.776757	1.6616	0.296426	1.40185	1.3811	0.175308	1.66651	-0.0616769	5006	986	732	875	724
1	hungaricus	LH041	LH041_G_04	LH041_G_04_RT_02	garden	LH041_04_2	RT	4N_5N	2_apomictic_obligate_asexual	3	1.82944	1	1	1	NA	NA	NA	meadow_edge	49.0866	19.3976	513	-0.465602	0.836508	0.577075	0.00279115	-0.50579	1.54297	0.411126	0.836635	0.0345752	-1.2814	1.48078	0.324414	-0.953739	-0.411545	-0.943975	0.776757	1.6616	0.296426	1.40185	1.3811	0.175308	1.66651	-0.0616769	5007	1209	962	1147	900
1	hungaricus	LH041	LH041_G_04	LH041_G_04_SL_01	garden	LH041_04_SL_1	SL	4N_5N	2_apomictic_obligate_asexual	3	1.82944	1	1	1	NA	NA	NA	meadow_edge	49.0866	19.3976	513	-0.465602	0.836508	0.577075	0.00279115	-0.50579	1.54297	0.411126	0.836635	0.0345752	-1.2814	1.48078	0.324414	-0.953739	-0.411545	-0.943975	0.776757	1.6616	0.296426	1.40185	1.3811	0.175308	1.66651	-0.0616769	8842	200	57	192	48
1	hungaricus	LH041	LH041_G_04	LH041_G_04_SL_02	garden	LH041_04_SL_2	SL	4N_5N	2_apomictic_obligate_asexual	3	1.82944	1	1	1	NA	NA	NA	meadow_edge	49.0866	19.3976	513	-0.465602	0.836508	0.577075	0.00279115	-0.50579	1.54297	0.411126	0.836635	0.0345752	-1.2814	1.48078	0.324414	-0.953739	-0.411545	-0.943975	0.776757	1.6616	0.296426	1.40185	1.3811	0.175308	1.66651	-0.0616769	8843	167	97	151	95
1	hungaricus	LH041	LH041_G_04	LH041_G_04_SL_03	garden	LH041_04_SL_3	SL	4N_5N	2_apomictic_obligate_asexual	3	1.82944	1	1	1	NA	NA	NA	meadow_edge	49.0866	19.3976	513	-0.465602	0.836508	0.577075	0.00279115	-0.50579	1.54297	0.411126	0.836635	0.0345752	-1.2814	1.48078	0.324414	-0.953739	-0.411545	-0.943975	0.776757	1.6616	0.296426	1.40185	1.3811	0.175308	1.66651	-0.0616769	8844	100	96	85	92
1	hungaricus	LH041	LH041_G_05	LH041_G_05_BL_01	garden	LH041_05_BL_1	BL	4N_5N	2_apomictic_obligate_asexual	3	1.82944	1	1	1	NA	NA	NA	meadow_edge	49.0866	19.3976	513	-0.465602	0.836508	0.577075	0.00279115	-0.50579	1.54297	0.411126	0.836635	0.0345752	-1.2814	1.48078	0.324414	-0.953739	-0.411545	-0.943975	0.776757	1.6616	0.296426	1.40185	1.3811	0.175308	1.66651	-0.0616769	592	371	227	332	250
1	hungaricus	LH041	LH041_G_05	LH041_G_05_BL_02	garden	LH041_05_BL_2	BL	4N_5N	2_apomictic_obligate_asexual	3	1.82944	1	1	1	NA	NA	NA	meadow_edge	49.0866	19.3976	513	-0.465602	0.836508	0.577075	0.00279115	-0.50579	1.54297	0.411126	0.836635	0.0345752	-1.2814	1.48078	0.324414	-0.953739	-0.411545	-0.943975	0.776757	1.6616	0.296426	1.40185	1.3811	0.175308	1.66651	-0.0616769	593	373	233	332	248
1	hungaricus	LH041	LH041_G_05	LH041_G_05_RT_01	garden	LH041_05_1	RT	4N_5N	2_apomictic_obligate_asexual	3	1.82944	1	1	1	NA	NA	NA	meadow_edge	49.0866	19.3976	513	-0.465602	0.836508	0.577075	0.00279115	-0.50579	1.54297	0.411126	0.836635	0.0345752	-1.2814	1.48078	0.324414	-0.953739	-0.411545	-0.943975	0.776757	1.6616	0.296426	1.40185	1.3811	0.175308	1.66651	-0.0616769	5008	1012	820	907	771
1	hungaricus	LH041	LH041_G_05	LH041_G_05_RT_02	garden	LH041_05_2	RT	4N_5N	2_apomictic_obligate_asexual	3	1.82944	1	1	1	NA	NA	NA	meadow_edge	49.0866	19.3976	513	-0.465602	0.836508	0.577075	0.00279115	-0.50579	1.54297	0.411126	0.836635	0.0345752	-1.2814	1.48078	0.324414	-0.953739	-0.411545	-0.943975	0.776757	1.6616	0.296426	1.40185	1.3811	0.175308	1.66651	-0.0616769	5009	1220	1073	1050	1026
1	hungaricus	LH041	LH041_G_05	LH041_G_05_SL_01	garden	LH041_05_SL_1	SL	4N_5N	2_apomictic_obligate_asexual	3	1.82944	1	1	1	NA	NA	NA	meadow_edge	49.0866	19.3976	513	-0.465602	0.836508	0.577075	0.00279115	-0.50579	1.54297	0.411126	0.836635	0.0345752	-1.2814	1.48078	0.324414	-0.953739	-0.411545	-0.943975	0.776757	1.6616	0.296426	1.40185	1.3811	0.175308	1.66651	-0.0616769	8845	106	120	95	117
1	hungaricus	LH041	LH041_G_05	LH041_G_05_SL_02	garden	LH041_05_SL_2	SL	4N_5N	2_apomictic_obligate_asexual	3	1.82944	1	1	1	NA	NA	NA	meadow_edge	49.0866	19.3976	513	-0.465602	0.836508	0.577075	0.00279115	-0.50579	1.54297	0.411126	0.836635	0.0345752	-1.2814	1.48078	0.324414	-0.953739	-0.411545	-0.943975	0.776757	1.6616	0.296426	1.40185	1.3811	0.175308	1.66651	-0.0616769	8846	142	106	132	101
1	hungaricus	LH041	LH041_G_06	LH041_G_06_BL_02	garden	LH041_06_BL_2	BL	4N_5N	2_apomictic_obligate_asexual	3	1.82944	1	1	1	NA	NA	NA	meadow_edge	49.0866	19.3976	513	-0.465602	0.836508	0.577075	0.00279115	-0.50579	1.54297	0.411126	0.836635	0.0345752	-1.2814	1.48078	0.324414	-0.953739	-0.411545	-0.943975	0.776757	1.6616	0.296426	1.40185	1.3811	0.175308	1.66651	-0.0616769	594	485	165	434	199
1	hungaricus	LH041	LH041_G_06	LH041_G_06_RT_01	garden	LH041_06_1	RT	4N_5N	2_apomictic_obligate_asexual	3	1.82944	1	1	1	NA	NA	NA	meadow_edge	49.0866	19.3976	513	-0.465602	0.836508	0.577075	0.00279115	-0.50579	1.54297	0.411126	0.836635	0.0345752	-1.2814	1.48078	0.324414	-0.953739	-0.411545	-0.943975	0.776757	1.6616	0.296426	1.40185	1.3811	0.175308	1.66651	-0.0616769	5010	1383	186	1224	192
1	hungaricus	LH041	LH041_G_06	LH041_G_06_SL_01	garden	LH041_06_SL_1	SL	4N_5N	2_apomictic_obligate_asexual	3	1.82944	1	1	1	NA	NA	NA	meadow_edge	49.0866	19.3976	513	-0.465602	0.836508	0.577075	0.00279115	-0.50579	1.54297	0.411126	0.836635	0.0345752	-1.2814	1.48078	0.324414	-0.953739	-0.411545	-0.943975	0.776757	1.6616	0.296426	1.40185	1.3811	0.175308	1.66651	-0.0616769	8847	224	127	204	131
1	hungaricus	LH041	LH041_G_06	LH041_G_06_SL_02	garden	LH041_06_SL_2	SL	4N_5N	2_apomictic_obligate_asexual	3	1.82944	1	1	1	NA	NA	NA	meadow_edge	49.0866	19.3976	513	-0.465602	0.836508	0.577075	0.00279115	-0.50579	1.54297	0.411126	0.836635	0.0345752	-1.2814	1.48078	0.324414	-0.953739	-0.411545	-0.943975	0.776757	1.6616	0.296426	1.40185	1.3811	0.175308	1.66651	-0.0616769	8848	213	145	199	145
1	hungaricus	LH041	LH041_G_07	LH041_G_07_BL_01	garden	LH041_07_BL_1	BL	4N_5N	2_apomictic_obligate_asexual	3	1.82944	1	1	1	NA	NA	NA	meadow_edge	49.0866	19.3976	513	-0.465602	0.836508	0.577075	0.00279115	-0.50579	1.54297	0.411126	0.836635	0.0345752	-1.2814	1.48078	0.324414	-0.953739	-0.411545	-0.943975	0.776757	1.6616	0.296426	1.40185	1.3811	0.175308	1.66651	-0.0616769	595	369	218	331	235
1	hungaricus	LH041	LH041_G_07	LH041_G_07_BL_02	garden	LH041_07_BL_2	BL	4N_5N	2_apomictic_obligate_asexual	3	1.82944	1	1	1	NA	NA	NA	meadow_edge	49.0866	19.3976	513	-0.465602	0.836508	0.577075	0.00279115	-0.50579	1.54297	0.411126	0.836635	0.0345752	-1.2814	1.48078	0.324414	-0.953739	-0.411545	-0.943975	0.776757	1.6616	0.296426	1.40185	1.3811	0.175308	1.66651	-0.0616769	596	429	286	386	316
1	hungaricus	LH041	LH041_G_07	LH041_G_07_BL_03	garden	LH041_07_BL_3	BL	4N_5N	2_apomictic_obligate_asexual	3	1.82944	1	1	1	NA	NA	NA	meadow_edge	49.0866	19.3976	513	-0.465602	0.836508	0.577075	0.00279115	-0.50579	1.54297	0.411126	0.836635	0.0345752	-1.2814	1.48078	0.324414	-0.953739	-0.411545	-0.943975	0.776757	1.6616	0.296426	1.40185	1.3811	0.175308	1.66651	-0.0616769	597	429	195	404	216
1	hungaricus	LH041	LH041_G_07	LH041_G_07_RT_01	garden	LH041_07_1	RT	4N_5N	2_apomictic_obligate_asexual	3	1.82944	1	1	1	NA	NA	NA	meadow_edge	49.0866	19.3976	513	-0.465602	0.836508	0.577075	0.00279115	-0.50579	1.54297	0.411126	0.836635	0.0345752	-1.2814	1.48078	0.324414	-0.953739	-0.411545	-0.943975	0.776757	1.6616	0.296426	1.40185	1.3811	0.175308	1.66651	-0.0616769	5011	746	807	635	805
1	hungaricus	LH041	LH041_G_07	LH041_G_07_RT_02	garden	LH041_07_2	RT	4N_5N	2_apomictic_obligate_asexual	3	1.82944	1	1	1	NA	NA	NA	meadow_edge	49.0866	19.3976	513	-0.465602	0.836508	0.577075	0.00279115	-0.50579	1.54297	0.411126	0.836635	0.0345752	-1.2814	1.48078	0.324414	-0.953739	-0.411545	-0.943975	0.776757	1.6616	0.296426	1.40185	1.3811	0.175308	1.66651	-0.0616769	5012	1205	717	1076	683
1	hungaricus	LH041	LH041_G_07	LH041_G_07_SL_02	garden	LH041_07_SL_2	SL	4N_5N	2_apomictic_obligate_asexual	3	1.82944	1	1	1	NA	NA	NA	meadow_edge	49.0866	19.3976	513	-0.465602	0.836508	0.577075	0.00279115	-0.50579	1.54297	0.411126	0.836635	0.0345752	-1.2814	1.48078	0.324414	-0.953739	-0.411545	-0.943975	0.776757	1.6616	0.296426	1.40185	1.3811	0.175308	1.66651	-0.0616769	8849	115	66	107	66
1	hungaricus	LH041	LH041_G_08	LH041_G_08_BL_01	garden	LH041_08_BL_1	BL	4N_5N	2_apomictic_obligate_asexual	3	1.82944	1	1	1	NA	NA	NA	meadow_edge	49.0866	19.3976	513	-0.465602	0.836508	0.577075	0.00279115	-0.50579	1.54297	0.411126	0.836635	0.0345752	-1.2814	1.48078	0.324414	-0.953739	-0.411545	-0.943975	0.776757	1.6616	0.296426	1.40185	1.3811	0.175308	1.66651	-0.0616769	598	416	212	373	232
1	hungaricus	LH041	LH041_G_08	LH041_G_08_BL_02	garden	LH041_08_BL_2	BL	4N_5N	2_apomictic_obligate_asexual	3	1.82944	1	1	1	NA	NA	NA	meadow_edge	49.0866	19.3976	513	-0.465602	0.836508	0.577075	0.00279115	-0.50579	1.54297	0.411126	0.836635	0.0345752	-1.2814	1.48078	0.324414	-0.953739	-0.411545	-0.943975	0.776757	1.6616	0.296426	1.40185	1.3811	0.175308	1.66651	-0.0616769	599	424	193	391	208
1	hungaricus	LH041	LH041_G_08	LH041_G_08_RT_01	garden	LH041_08_1	RT	4N_5N	2_apomictic_obligate_asexual	3	1.82944	1	1	1	NA	NA	NA	meadow_edge	49.0866	19.3976	513	-0.465602	0.836508	0.577075	0.00279115	-0.50579	1.54297	0.411126	0.836635	0.0345752	-1.2814	1.48078	0.324414	-0.953739	-0.411545	-0.943975	0.776757	1.6616	0.296426	1.40185	1.3811	0.175308	1.66651	-0.0616769	5013	1177	675	1050	672
1	hungaricus	LH041	LH041_G_08	LH041_G_08_RT_02	garden	LH041_08_2	RT	4N_5N	2_apomictic_obligate_asexual	3	1.82944	1	1	1	NA	NA	NA	meadow_edge	49.0866	19.3976	513	-0.465602	0.836508	0.577075	0.00279115	-0.50579	1.54297	0.411126	0.836635	0.0345752	-1.2814	1.48078	0.324414	-0.953739	-0.411545	-0.943975	0.776757	1.6616	0.296426	1.40185	1.3811	0.175308	1.66651	-0.0616769	5014	1314	876	1200	784
1	hungaricus	LH041	LH041_G_08	LH041_G_08_SL_01	garden	LH041_08_SL_1	SL	4N_5N	2_apomictic_obligate_asexual	3	1.82944	1	1	1	NA	NA	NA	meadow_edge	49.0866	19.3976	513	-0.465602	0.836508	0.577075	0.00279115	-0.50579	1.54297	0.411126	0.836635	0.0345752	-1.2814	1.48078	0.324414	-0.953739	-0.411545	-0.943975	0.776757	1.6616	0.296426	1.40185	1.3811	0.175308	1.66651	-0.0616769	8850	152	90	147	85
1	hungaricus	LH041	LH041_G_08	LH041_G_08_SL_02	garden	LH041_08_SL_2	SL	4N_5N	2_apomictic_obligate_asexual	3	1.82944	1	1	1	NA	NA	NA	meadow_edge	49.0866	19.3976	513	-0.465602	0.836508	0.577075	0.00279115	-0.50579	1.54297	0.411126	0.836635	0.0345752	-1.2814	1.48078	0.324414	-0.953739	-0.411545	-0.943975	0.776757	1.6616	0.296426	1.40185	1.3811	0.175308	1.66651	-0.0616769	8851	58	146	47	151
1	hungaricus	LH041	LH041_G_08	LH041_G_08_SL_03	garden	LH041_08_SL_3	SL	4N_5N	2_apomictic_obligate_asexual	3	1.82944	1	1	1	NA	NA	NA	meadow_edge	49.0866	19.3976	513	-0.465602	0.836508	0.577075	0.00279115	-0.50579	1.54297	0.411126	0.836635	0.0345752	-1.2814	1.48078	0.324414	-0.953739	-0.411545	-0.943975	0.776757	1.6616	0.296426	1.40185	1.3811	0.175308	1.66651	-0.0616769	8852	199	170	186	168
1	hungaricus	LH041	LH041_G_09	LH041_G_09_BL_01	garden	LH041_09_BL_1	BL	4N_5N	2_apomictic_obligate_asexual	3	1.82944	1	1	1	NA	NA	NA	meadow_edge	49.0866	19.3976	513	-0.465602	0.836508	0.577075	0.00279115	-0.50579	1.54297	0.411126	0.836635	0.0345752	-1.2814	1.48078	0.324414	-0.953739	-0.411545	-0.943975	0.776757	1.6616	0.296426	1.40185	1.3811	0.175308	1.66651	-0.0616769	600	497	233	463	244
1	hungaricus	LH041	LH041_G_09	LH041_G_09_BL_02	garden	LH041_09_BL_2	BL	4N_5N	2_apomictic_obligate_asexual	3	1.82944	1	1	1	NA	NA	NA	meadow_edge	49.0866	19.3976	513	-0.465602	0.836508	0.577075	0.00279115	-0.50579	1.54297	0.411126	0.836635	0.0345752	-1.2814	1.48078	0.324414	-0.953739	-0.411545	-0.943975	0.776757	1.6616	0.296426	1.40185	1.3811	0.175308	1.66651	-0.0616769	601	347	251	305	282
1	hungaricus	LH041	LH041_G_09	LH041_G_09_BL_03	garden	LH041_09_BL_3	BL	4N_5N	2_apomictic_obligate_asexual	3	1.82944	1	1	1	NA	NA	NA	meadow_edge	49.0866	19.3976	513	-0.465602	0.836508	0.577075	0.00279115	-0.50579	1.54297	0.411126	0.836635	0.0345752	-1.2814	1.48078	0.324414	-0.953739	-0.411545	-0.943975	0.776757	1.6616	0.296426	1.40185	1.3811	0.175308	1.66651	-0.0616769	602	443	229	432	239
1	hungaricus	LH041	LH041_G_09	LH041_G_09_BL_04	garden	LH041_09_BL_4	BL	4N_5N	2_apomictic_obligate_asexual	3	1.82944	1	1	1	NA	NA	NA	meadow_edge	49.0866	19.3976	513	-0.465602	0.836508	0.577075	0.00279115	-0.50579	1.54297	0.411126	0.836635	0.0345752	-1.2814	1.48078	0.324414	-0.953739	-0.411545	-0.943975	0.776757	1.6616	0.296426	1.40185	1.3811	0.175308	1.66651	-0.0616769	603	439	267	401	278
1	hungaricus	LH041	LH041_G_09	LH041_G_09_RT_01	garden	LH041_09_1	RT	4N_5N	2_apomictic_obligate_asexual	3	1.82944	1	1	1	NA	NA	NA	meadow_edge	49.0866	19.3976	513	-0.465602	0.836508	0.577075	0.00279115	-0.50579	1.54297	0.411126	0.836635	0.0345752	-1.2814	1.48078	0.324414	-0.953739	-0.411545	-0.943975	0.776757	1.6616	0.296426	1.40185	1.3811	0.175308	1.66651	-0.0616769	5015	898	857	750	846
1	hungaricus	LH041	LH041_G_09	LH041_G_09_RT_02	garden	LH041_09_2	RT	4N_5N	2_apomictic_obligate_asexual	3	1.82944	1	1	1	NA	NA	NA	meadow_edge	49.0866	19.3976	513	-0.465602	0.836508	0.577075	0.00279115	-0.50579	1.54297	0.411126	0.836635	0.0345752	-1.2814	1.48078	0.324414	-0.953739	-0.411545	-0.943975	0.776757	1.6616	0.296426	1.40185	1.3811	0.175308	1.66651	-0.0616769	5016	1507	413	1363	415
1	hungaricus	LH041	LH041_G_09	LH041_G_09_SL_01	garden	LH041_09_SL_1	SL	4N_5N	2_apomictic_obligate_asexual	3	1.82944	1	1	1	NA	NA	NA	meadow_edge	49.0866	19.3976	513	-0.465602	0.836508	0.577075	0.00279115	-0.50579	1.54297	0.411126	0.836635	0.0345752	-1.2814	1.48078	0.324414	-0.953739	-0.411545	-0.943975	0.776757	1.6616	0.296426	1.40185	1.3811	0.175308	1.66651	-0.0616769	8853	212	107	206	106
1	hungaricus	LH041	LH041_G_09	LH041_G_09_SL_02	garden	LH041_09_SL_2	SL	4N_5N	2_apomictic_obligate_asexual	3	1.82944	1	1	1	NA	NA	NA	meadow_edge	49.0866	19.3976	513	-0.465602	0.836508	0.577075	0.00279115	-0.50579	1.54297	0.411126	0.836635	0.0345752	-1.2814	1.48078	0.324414	-0.953739	-0.411545	-0.943975	0.776757	1.6616	0.296426	1.40185	1.3811	0.175308	1.66651	-0.0616769	8854	234	118	226	114
1	hungaricus	LH041	LH041_G_09	LH041_G_09_SL_03	garden	LH041_09_SL_3	SL	4N_5N	2_apomictic_obligate_asexual	3	1.82944	1	1	1	NA	NA	NA	meadow_edge	49.0866	19.3976	513	-0.465602	0.836508	0.577075	0.00279115	-0.50579	1.54297	0.411126	0.836635	0.0345752	-1.2814	1.48078	0.324414	-0.953739	-0.411545	-0.943975	0.776757	1.6616	0.296426	1.40185	1.3811	0.175308	1.66651	-0.0616769	8855	144	109	134	115
1	hungaricus	LH041	LH041_G_10	LH041_G_10_BL_01	garden	LH041_10_BL_1	BL	4N_5N	2_apomictic_obligate_asexual	3	1.82944	1	1	1	NA	NA	NA	meadow_edge	49.0866	19.3976	513	-0.465602	0.836508	0.577075	0.00279115	-0.50579	1.54297	0.411126	0.836635	0.0345752	-1.2814	1.48078	0.324414	-0.953739	-0.411545	-0.943975	0.776757	1.6616	0.296426	1.40185	1.3811	0.175308	1.66651	-0.0616769	604	327	264	298	285
1	hungaricus	LH041	LH041_G_10	LH041_G_10_BL_02	garden	LH041_10_BL_2	BL	4N_5N	2_apomictic_obligate_asexual	3	1.82944	1	1	1	NA	NA	NA	meadow_edge	49.0866	19.3976	513	-0.465602	0.836508	0.577075	0.00279115	-0.50579	1.54297	0.411126	0.836635	0.0345752	-1.2814	1.48078	0.324414	-0.953739	-0.411545	-0.943975	0.776757	1.6616	0.296426	1.40185	1.3811	0.175308	1.66651	-0.0616769	605	458	291	396	320
1	hungaricus	LH041	LH041_G_10	LH041_G_10_BL_03	garden	LH041_10_BL_3	BL	4N_5N	2_apomictic_obligate_asexual	3	1.82944	1	1	1	NA	NA	NA	meadow_edge	49.0866	19.3976	513	-0.465602	0.836508	0.577075	0.00279115	-0.50579	1.54297	0.411126	0.836635	0.0345752	-1.2814	1.48078	0.324414	-0.953739	-0.411545	-0.943975	0.776757	1.6616	0.296426	1.40185	1.3811	0.175308	1.66651	-0.0616769	606	387	171	344	196
1	hungaricus	LH041	LH041_G_10	LH041_G_10_RT_01	garden	LH041_10_1	RT	4N_5N	2_apomictic_obligate_asexual	3	1.82944	1	1	1	NA	NA	NA	meadow_edge	49.0866	19.3976	513	-0.465602	0.836508	0.577075	0.00279115	-0.50579	1.54297	0.411126	0.836635	0.0345752	-1.2814	1.48078	0.324414	-0.953739	-0.411545	-0.943975	0.776757	1.6616	0.296426	1.40185	1.3811	0.175308	1.66651	-0.0616769	5017	1151	1050	1100	994
1	hungaricus	LH041	LH041_G_10	LH041_G_10_SL_01	garden	LH041_10_SL_1	SL	4N_5N	2_apomictic_obligate_asexual	3	1.82944	1	1	1	NA	NA	NA	meadow_edge	49.0866	19.3976	513	-0.465602	0.836508	0.577075	0.00279115	-0.50579	1.54297	0.411126	0.836635	0.0345752	-1.2814	1.48078	0.324414	-0.953739	-0.411545	-0.943975	0.776757	1.6616	0.296426	1.40185	1.3811	0.175308	1.66651	-0.0616769	8856	141	68	131	69
1	hungaricus	LH041	LH041_G_10	LH041_G_10_SL_02	garden	LH041_10_SL_2	SL	4N_5N	2_apomictic_obligate_asexual	3	1.82944	1	1	1	NA	NA	NA	meadow_edge	49.0866	19.3976	513	-0.465602	0.836508	0.577075	0.00279115	-0.50579	1.54297	0.411126	0.836635	0.0345752	-1.2814	1.48078	0.324414	-0.953739	-0.411545	-0.943975	0.776757	1.6616	0.296426	1.40185	1.3811	0.175308	1.66651	-0.0616769	8857	172	100	162	102
1	hungaricus	LH041	LH041_G_10	LH041_G_10_SL_03	garden	LH041_10_SL_3	SL	4N_5N	2_apomictic_obligate_asexual	3	1.82944	1	1	1	NA	NA	NA	meadow_edge	49.0866	19.3976	513	-0.465602	0.836508	0.577075	0.00279115	-0.50579	1.54297	0.411126	0.836635	0.0345752	-1.2814	1.48078	0.324414	-0.953739	-0.411545	-0.943975	0.776757	1.6616	0.296426	1.40185	1.3811	0.175308	1.66651	-0.0616769	8858	197	106	188	108
1	hungaricus	LH041	LH041_G_11	LH041_G_11_BL_01	garden	LH041_11_BL_1	BL	4N_5N	2_apomictic_obligate_asexual	3	1.82944	1	1	1	NA	NA	NA	meadow_edge	49.0866	19.3976	513	-0.465602	0.836508	0.577075	0.00279115	-0.50579	1.54297	0.411126	0.836635	0.0345752	-1.2814	1.48078	0.324414	-0.953739	-0.411545	-0.943975	0.776757	1.6616	0.296426	1.40185	1.3811	0.175308	1.66651	-0.0616769	607	361	169	306	183
1	hungaricus	LH041	LH041_G_11	LH041_G_11_BL_02	garden	LH041_11_BL_2	BL	4N_5N	2_apomictic_obligate_asexual	3	1.82944	1	1	1	NA	NA	NA	meadow_edge	49.0866	19.3976	513	-0.465602	0.836508	0.577075	0.00279115	-0.50579	1.54297	0.411126	0.836635	0.0345752	-1.2814	1.48078	0.324414	-0.953739	-0.411545	-0.943975	0.776757	1.6616	0.296426	1.40185	1.3811	0.175308	1.66651	-0.0616769	608	268	121	246	135
1	hungaricus	LH041	LH041_G_11	LH041_G_11_BL_03	garden	LH041_11_BL_3	BL	4N_5N	2_apomictic_obligate_asexual	3	1.82944	1	1	1	NA	NA	NA	meadow_edge	49.0866	19.3976	513	-0.465602	0.836508	0.577075	0.00279115	-0.50579	1.54297	0.411126	0.836635	0.0345752	-1.2814	1.48078	0.324414	-0.953739	-0.411545	-0.943975	0.776757	1.6616	0.296426	1.40185	1.3811	0.175308	1.66651	-0.0616769	609	265	147	236	172
1	hungaricus	LH041	LH041_G_11	LH041_G_11_RT_01	garden	LH041_11_1	RT	4N_5N	2_apomictic_obligate_asexual	3	1.82944	1	1	1	NA	NA	NA	meadow_edge	49.0866	19.3976	513	-0.465602	0.836508	0.577075	0.00279115	-0.50579	1.54297	0.411126	0.836635	0.0345752	-1.2814	1.48078	0.324414	-0.953739	-0.411545	-0.943975	0.776757	1.6616	0.296426	1.40185	1.3811	0.175308	1.66651	-0.0616769	5018	1119	362	960	353
1	hungaricus	LH041	LH041_G_11	LH041_G_11_RT_02	garden	LH041_11_2	RT	4N_5N	2_apomictic_obligate_asexual	3	1.82944	1	1	1	NA	NA	NA	meadow_edge	49.0866	19.3976	513	-0.465602	0.836508	0.577075	0.00279115	-0.50579	1.54297	0.411126	0.836635	0.0345752	-1.2814	1.48078	0.324414	-0.953739	-0.411545	-0.943975	0.776757	1.6616	0.296426	1.40185	1.3811	0.175308	1.66651	-0.0616769	5019	1237	675	1100	662
1	hungaricus	LH041	LH041_G_11	LH041_G_11_SL_01	garden	LH041_11_SL_1	SL	4N_5N	2_apomictic_obligate_asexual	3	1.82944	1	1	1	NA	NA	NA	meadow_edge	49.0866	19.3976	513	-0.465602	0.836508	0.577075	0.00279115	-0.50579	1.54297	0.411126	0.836635	0.0345752	-1.2814	1.48078	0.324414	-0.953739	-0.411545	-0.943975	0.776757	1.6616	0.296426	1.40185	1.3811	0.175308	1.66651	-0.0616769	8859	132	46	116	39
1	hungaricus	LH041	LH041_G_11	LH041_G_11_SL_02	garden	LH041_11_SL_2	SL	4N_5N	2_apomictic_obligate_asexual	3	1.82944	1	1	1	NA	NA	NA	meadow_edge	49.0866	19.3976	513	-0.465602	0.836508	0.577075	0.00279115	-0.50579	1.54297	0.411126	0.836635	0.0345752	-1.2814	1.48078	0.324414	-0.953739	-0.411545	-0.943975	0.776757	1.6616	0.296426	1.40185	1.3811	0.175308	1.66651	-0.0616769	8860	203	163	194	169
1	hungaricus	LH041	LH041_G_11	LH041_G_11_SL_03	garden	LH041_11_SL_3	SL	4N_5N	2_apomictic_obligate_asexual	3	1.82944	1	1	1	NA	NA	NA	meadow_edge	49.0866	19.3976	513	-0.465602	0.836508	0.577075	0.00279115	-0.50579	1.54297	0.411126	0.836635	0.0345752	-1.2814	1.48078	0.324414	-0.953739	-0.411545	-0.943975	0.776757	1.6616	0.296426	1.40185	1.3811	0.175308	1.66651	-0.0616769	8861	114	150	108	155
1	imitans	10374	10374_G_01	10374_G_01_BL_01	garden	10374_01_BL_1_garden	BL	4N	2_apomictic_obligate_asexual	3	0.884697	1	1	1	1	1	1	forest	59.553	17.3861	41	1.494	0.507668	-0.689688	-0.907994	-0.801719	-1.04818	-1.3507	0.785623	-0.540787	-0.678229	0.315023	-0.00893437	-0.465034	-0.352787	-0.823211	-0.865166	-0.79021	-0.982706	0.676956	-0.759972	-0.971992	-0.726186	-0.699005	32	540	405	505	399
1	imitans	10374	10374_G_01	10374_G_01_BL_02	garden	10374_01_BL_2_garden	BL	4N	2_apomictic_obligate_asexual	3	0.884697	1	1	1	1	1	1	forest	59.553	17.3861	41	1.494	0.507668	-0.689688	-0.907994	-0.801719	-1.04818	-1.3507	0.785623	-0.540787	-0.678229	0.315023	-0.00893437	-0.465034	-0.352787	-0.823211	-0.865166	-0.79021	-0.982706	0.676956	-0.759972	-0.971992	-0.726186	-0.699005	33	461	301	436	294
1	imitans	10374	10374_G_01	10374_G_01_BL_04	garden	10374_01_BL_4_garden	BL	4N	2_apomictic_obligate_asexual	3	0.884697	1	1	1	1	1	1	forest	59.553	17.3861	41	1.494	0.507668	-0.689688	-0.907994	-0.801719	-1.04818	-1.3507	0.785623	-0.540787	-0.678229	0.315023	-0.00893437	-0.465034	-0.352787	-0.823211	-0.865166	-0.79021	-0.982706	0.676956	-0.759972	-0.971992	-0.726186	-0.699005	34	430	311	394	315
1	imitans	10374	10374_G_01	10374_G_01_RT_01	garden	10374_1_1	RT	4N	2_apomictic_obligate_asexual	3	0.884697	1	1	1	1	1	1	forest	59.553	17.3861	41	1.494	0.507668	-0.689688	-0.907994	-0.801719	-1.04818	-1.3507	0.785623	-0.540787	-0.678229	0.315023	-0.00893437	-0.465034	-0.352787	-0.823211	-0.865166	-0.79021	-0.982706	0.676956	-0.759972	-0.971992	-0.726186	-0.699005	4487	1122	713	983	717
1	imitans	10374	10374_G_01	10374_G_01_RT_02	garden	10374_1_2	RT	4N	2_apomictic_obligate_asexual	3	0.884697	1	1	1	1	1	1	forest	59.553	17.3861	41	1.494	0.507668	-0.689688	-0.907994	-0.801719	-1.04818	-1.3507	0.785623	-0.540787	-0.678229	0.315023	-0.00893437	-0.465034	-0.352787	-0.823211	-0.865166	-0.79021	-0.982706	0.676956	-0.759972	-0.971992	-0.726186	-0.699005	4488	1099	772	1004	795
1	imitans	10374	10374_G_02	10374_G_02_BL_01	garden	10374_02_BL_1_garden	BL	4N	2_apomictic_obligate_asexual	3	0.884697	1	1	1	1	1	1	forest	59.553	17.3861	41	1.494	0.507668	-0.689688	-0.907994	-0.801719	-1.04818	-1.3507	0.785623	-0.540787	-0.678229	0.315023	-0.00893437	-0.465034	-0.352787	-0.823211	-0.865166	-0.79021	-0.982706	0.676956	-0.759972	-0.971992	-0.726186	-0.699005	35	617	380	577	380
1	imitans	10374	10374_G_02	10374_G_02_BL_02	garden	10374_02_BL_2_garden	BL	4N	2_apomictic_obligate_asexual	3	0.884697	1	1	1	1	1	1	forest	59.553	17.3861	41	1.494	0.507668	-0.689688	-0.907994	-0.801719	-1.04818	-1.3507	0.785623	-0.540787	-0.678229	0.315023	-0.00893437	-0.465034	-0.352787	-0.823211	-0.865166	-0.79021	-0.982706	0.676956	-0.759972	-0.971992	-0.726186	-0.699005	36	585	472	548	471
1	imitans	10374	10374_G_02	10374_G_02_BL_03	garden	10374_02_BL_3_garden	BL	4N	2_apomictic_obligate_asexual	3	0.884697	1	1	1	1	1	1	forest	59.553	17.3861	41	1.494	0.507668	-0.689688	-0.907994	-0.801719	-1.04818	-1.3507	0.785623	-0.540787	-0.678229	0.315023	-0.00893437	-0.465034	-0.352787	-0.823211	-0.865166	-0.79021	-0.982706	0.676956	-0.759972	-0.971992	-0.726186	-0.699005	37	435	222	407	222
1	imitans	10374	10374_G_02	10374_G_02_BL_04	garden	10374_02_BL_4_garden	BL	4N	2_apomictic_obligate_asexual	3	0.884697	1	1	1	1	1	1	forest	59.553	17.3861	41	1.494	0.507668	-0.689688	-0.907994	-0.801719	-1.04818	-1.3507	0.785623	-0.540787	-0.678229	0.315023	-0.00893437	-0.465034	-0.352787	-0.823211	-0.865166	-0.79021	-0.982706	0.676956	-0.759972	-0.971992	-0.726186	-0.699005	38	461	304	441	299
1	imitans	10374	10374_G_02	10374_G_02_RT_01	garden	10374_2_1	RT	4N	2_apomictic_obligate_asexual	3	0.884697	1	1	1	1	1	1	forest	59.553	17.3861	41	1.494	0.507668	-0.689688	-0.907994	-0.801719	-1.04818	-1.3507	0.785623	-0.540787	-0.678229	0.315023	-0.00893437	-0.465034	-0.352787	-0.823211	-0.865166	-0.79021	-0.982706	0.676956	-0.759972	-0.971992	-0.726186	-0.699005	4489	1101	351	959	342
1	imitans	10374	10374_G_02	10374_G_02_RT_02	garden	10374_2_2	RT	4N	2_apomictic_obligate_asexual	3	0.884697	1	1	1	1	1	1	forest	59.553	17.3861	41	1.494	0.507668	-0.689688	-0.907994	-0.801719	-1.04818	-1.3507	0.785623	-0.540787	-0.678229	0.315023	-0.00893437	-0.465034	-0.352787	-0.823211	-0.865166	-0.79021	-0.982706	0.676956	-0.759972	-0.971992	-0.726186	-0.699005	4490	1398	844	1270	839
1	imitans	10374	10374_G_02	10374_G_02_SL_01	garden	10374_02_SL_1	SL	4N	2_apomictic_obligate_asexual	3	0.884697	1	1	1	1	1	1	forest	59.553	17.3861	41	1.494	0.507668	-0.689688	-0.907994	-0.801719	-1.04818	-1.3507	0.785623	-0.540787	-0.678229	0.315023	-0.00893437	-0.465034	-0.352787	-0.823211	-0.865166	-0.79021	-0.982706	0.676956	-0.759972	-0.971992	-0.726186	-0.699005	8307	174	39	163	39
1	imitans	10374	10374_G_03	10374_G_03_BL_01	garden	10374_3_BL_1_garden	BL	4N	2_apomictic_obligate_asexual	3	0.884697	1	1	1	1	1	1	forest	59.553	17.3861	41	1.494	0.507668	-0.689688	-0.907994	-0.801719	-1.04818	-1.3507	0.785623	-0.540787	-0.678229	0.315023	-0.00893437	-0.465034	-0.352787	-0.823211	-0.865166	-0.79021	-0.982706	0.676956	-0.759972	-0.971992	-0.726186	-0.699005	39	542	314	512	306
1	imitans	10374	10374_G_03	10374_G_03_BL_02	garden	10374_3_BL_2_garden	BL	4N	2_apomictic_obligate_asexual	3	0.884697	1	1	1	1	1	1	forest	59.553	17.3861	41	1.494	0.507668	-0.689688	-0.907994	-0.801719	-1.04818	-1.3507	0.785623	-0.540787	-0.678229	0.315023	-0.00893437	-0.465034	-0.352787	-0.823211	-0.865166	-0.79021	-0.982706	0.676956	-0.759972	-0.971992	-0.726186	-0.699005	40	442	238	392	247
1	imitans	10374	10374_G_03	10374_G_03_RT_01	garden	10374_3_1	RT	4N	2_apomictic_obligate_asexual	3	0.884697	1	1	1	1	1	1	forest	59.553	17.3861	41	1.494	0.507668	-0.689688	-0.907994	-0.801719	-1.04818	-1.3507	0.785623	-0.540787	-0.678229	0.315023	-0.00893437	-0.465034	-0.352787	-0.823211	-0.865166	-0.79021	-0.982706	0.676956	-0.759972	-0.971992	-0.726186	-0.699005	4491	1315	505	1198	496
1	imitans	10374	10374_G_03	10374_G_03_RT_02	garden	10374_3_2	RT	4N	2_apomictic_obligate_asexual	3	0.884697	1	1	1	1	1	1	forest	59.553	17.3861	41	1.494	0.507668	-0.689688	-0.907994	-0.801719	-1.04818	-1.3507	0.785623	-0.540787	-0.678229	0.315023	-0.00893437	-0.465034	-0.352787	-0.823211	-0.865166	-0.79021	-0.982706	0.676956	-0.759972	-0.971992	-0.726186	-0.699005	4492	1755	676	1606	679
1	imitans	10374	10374_G_03	10374_G_03_SL_01	garden	10374_3_SL_1	SL	4N	2_apomictic_obligate_asexual	3	0.884697	1	1	1	1	1	1	forest	59.553	17.3861	41	1.494	0.507668	-0.689688	-0.907994	-0.801719	-1.04818	-1.3507	0.785623	-0.540787	-0.678229	0.315023	-0.00893437	-0.465034	-0.352787	-0.823211	-0.865166	-0.79021	-0.982706	0.676956	-0.759972	-0.971992	-0.726186	-0.699005	8308	165	17	145	17
1	imitans	10374	10374_G_03	10374_G_03_SL_02	garden	10374_3_SL_2	SL	4N	2_apomictic_obligate_asexual	3	0.884697	1	1	1	1	1	1	forest	59.553	17.3861	41	1.494	0.507668	-0.689688	-0.907994	-0.801719	-1.04818	-1.3507	0.785623	-0.540787	-0.678229	0.315023	-0.00893437	-0.465034	-0.352787	-0.823211	-0.865166	-0.79021	-0.982706	0.676956	-0.759972	-0.971992	-0.726186	-0.699005	8309	106	30	91	31
1	imitans	10374	10374_G_03	10374_G_03_SL_03	garden	10374_3_SL_3	SL	4N	2_apomictic_obligate_asexual	3	0.884697	1	1	1	1	1	1	forest	59.553	17.3861	41	1.494	0.507668	-0.689688	-0.907994	-0.801719	-1.04818	-1.3507	0.785623	-0.540787	-0.678229	0.315023	-0.00893437	-0.465034	-0.352787	-0.823211	-0.865166	-0.79021	-0.982706	0.676956	-0.759972	-0.971992	-0.726186	-0.699005	8310	141	29	120	30
1	imitans	10374	10374_G_03	10374_G_03_SL_04	garden	10374_3_SL_4	SL	4N	2_apomictic_obligate_asexual	3	0.884697	1	1	1	1	1	1	forest	59.553	17.3861	41	1.494	0.507668	-0.689688	-0.907994	-0.801719	-1.04818	-1.3507	0.785623	-0.540787	-0.678229	0.315023	-0.00893437	-0.465034	-0.352787	-0.823211	-0.865166	-0.79021	-0.982706	0.676956	-0.759972	-0.971992	-0.726186	-0.699005	8311	22	30	10	31
1	imitans	10374	10374_G_04	10374_G_04_BL_01	garden	10374_04_BL_1_garden	BL	4N	2_apomictic_obligate_asexual	3	0.884697	1	1	1	1	1	1	forest	59.553	17.3861	41	1.494	0.507668	-0.689688	-0.907994	-0.801719	-1.04818	-1.3507	0.785623	-0.540787	-0.678229	0.315023	-0.00893437	-0.465034	-0.352787	-0.823211	-0.865166	-0.79021	-0.982706	0.676956	-0.759972	-0.971992	-0.726186	-0.699005	41	615	406	586	391
1	imitans	10374	10374_G_04	10374_G_04_BL_02	garden	10374_04_BL_2_garden	BL	4N	2_apomictic_obligate_asexual	3	0.884697	1	1	1	1	1	1	forest	59.553	17.3861	41	1.494	0.507668	-0.689688	-0.907994	-0.801719	-1.04818	-1.3507	0.785623	-0.540787	-0.678229	0.315023	-0.00893437	-0.465034	-0.352787	-0.823211	-0.865166	-0.79021	-0.982706	0.676956	-0.759972	-0.971992	-0.726186	-0.699005	42	590	500	557	483
1	imitans	10374	10374_G_04	10374_G_04_RT_01	garden	10374_4_1	RT	4N	2_apomictic_obligate_asexual	3	0.884697	1	1	1	1	1	1	forest	59.553	17.3861	41	1.494	0.507668	-0.689688	-0.907994	-0.801719	-1.04818	-1.3507	0.785623	-0.540787	-0.678229	0.315023	-0.00893437	-0.465034	-0.352787	-0.823211	-0.865166	-0.79021	-0.982706	0.676956	-0.759972	-0.971992	-0.726186	-0.699005	4493	870	531	787	553
1	imitans	10374	10374_G_04	10374_G_04_RT_02	garden	10374_4_2	RT	4N	2_apomictic_obligate_asexual	3	0.884697	1	1	1	1	1	1	forest	59.553	17.3861	41	1.494	0.507668	-0.689688	-0.907994	-0.801719	-1.04818	-1.3507	0.785623	-0.540787	-0.678229	0.315023	-0.00893437	-0.465034	-0.352787	-0.823211	-0.865166	-0.79021	-0.982706	0.676956	-0.759972	-0.971992	-0.726186	-0.699005	4494	1238	294	1110	322
1	imitans	10374	10374_G_05	10374_G_05_BL_01	garden	10374_05_BL_1_garden	BL	4N	2_apomictic_obligate_asexual	3	0.884697	1	1	1	1	1	1	forest	59.553	17.3861	41	1.494	0.507668	-0.689688	-0.907994	-0.801719	-1.04818	-1.3507	0.785623	-0.540787	-0.678229	0.315023	-0.00893437	-0.465034	-0.352787	-0.823211	-0.865166	-0.79021	-0.982706	0.676956	-0.759972	-0.971992	-0.726186	-0.699005	43	334	275	315	257
1	imitans	10374	10374_G_05	10374_G_05_BL_02	garden	10374_05_BL_2_garden	BL	4N	2_apomictic_obligate_asexual	3	0.884697	1	1	1	1	1	1	forest	59.553	17.3861	41	1.494	0.507668	-0.689688	-0.907994	-0.801719	-1.04818	-1.3507	0.785623	-0.540787	-0.678229	0.315023	-0.00893437	-0.465034	-0.352787	-0.823211	-0.865166	-0.79021	-0.982706	0.676956	-0.759972	-0.971992	-0.726186	-0.699005	44	434	282	409	272
1	imitans	10374	10374_G_05	10374_G_05_BL_03	garden	10374_05_BL_3_garden	BL	4N	2_apomictic_obligate_asexual	3	0.884697	1	1	1	1	1	1	forest	59.553	17.3861	41	1.494	0.507668	-0.689688	-0.907994	-0.801719	-1.04818	-1.3507	0.785623	-0.540787	-0.678229	0.315023	-0.00893437	-0.465034	-0.352787	-0.823211	-0.865166	-0.79021	-0.982706	0.676956	-0.759972	-0.971992	-0.726186	-0.699005	45	243	91	230	84
1	imitans	10374	10374_G_05	10374_G_05_RT_01	garden	10374_5_1	RT	4N	2_apomictic_obligate_asexual	3	0.884697	1	1	1	1	1	1	forest	59.553	17.3861	41	1.494	0.507668	-0.689688	-0.907994	-0.801719	-1.04818	-1.3507	0.785623	-0.540787	-0.678229	0.315023	-0.00893437	-0.465034	-0.352787	-0.823211	-0.865166	-0.79021	-0.982706	0.676956	-0.759972	-0.971992	-0.726186	-0.699005	4495	1144	496	987	491
1	imitans	10374	10374_G_05	10374_G_05_RT_02	garden	10374_5_2	RT	4N	2_apomictic_obligate_asexual	3	0.884697	1	1	1	1	1	1	forest	59.553	17.3861	41	1.494	0.507668	-0.689688	-0.907994	-0.801719	-1.04818	-1.3507	0.785623	-0.540787	-0.678229	0.315023	-0.00893437	-0.465034	-0.352787	-0.823211	-0.865166	-0.79021	-0.982706	0.676956	-0.759972	-0.971992	-0.726186	-0.699005	4496	1324	667	1215	648
1	imitans	10374	10374_G_06	10374_G_06_BL_01	garden	10374_06_BL_1_garden	BL	4N	2_apomictic_obligate_asexual	3	0.884697	1	1	1	1	1	1	forest	59.553	17.3861	41	1.494	0.507668	-0.689688	-0.907994	-0.801719	-1.04818	-1.3507	0.785623	-0.540787	-0.678229	0.315023	-0.00893437	-0.465034	-0.352787	-0.823211	-0.865166	-0.79021	-0.982706	0.676956	-0.759972	-0.971992	-0.726186	-0.699005	46	690	540	643	536
1	imitans	10374	10374_G_06	10374_G_06_BL_02	garden	10374_06_BL_2_garden	BL	4N	2_apomictic_obligate_asexual	3	0.884697	1	1	1	1	1	1	forest	59.553	17.3861	41	1.494	0.507668	-0.689688	-0.907994	-0.801719	-1.04818	-1.3507	0.785623	-0.540787	-0.678229	0.315023	-0.00893437	-0.465034	-0.352787	-0.823211	-0.865166	-0.79021	-0.982706	0.676956	-0.759972	-0.971992	-0.726186	-0.699005	47	378	207	333	221
1	imitans	10374	10374_G_06	10374_G_06_BL_03	garden	10374_06_BL_3_garden	BL	4N	2_apomictic_obligate_asexual	3	0.884697	1	1	1	1	1	1	forest	59.553	17.3861	41	1.494	0.507668	-0.689688	-0.907994	-0.801719	-1.04818	-1.3507	0.785623	-0.540787	-0.678229	0.315023	-0.00893437	-0.465034	-0.352787	-0.823211	-0.865166	-0.79021	-0.982706	0.676956	-0.759972	-0.971992	-0.726186	-0.699005	48	432	296	402	284
1	imitans	10374	10374_G_06	10374_G_06_BL_04	garden	10374_06_BL_4_garden	BL	4N	2_apomictic_obligate_asexual	3	0.884697	1	1	1	1	1	1	forest	59.553	17.3861	41	1.494	0.507668	-0.689688	-0.907994	-0.801719	-1.04818	-1.3507	0.785623	-0.540787	-0.678229	0.315023	-0.00893437	-0.465034	-0.352787	-0.823211	-0.865166	-0.79021	-0.982706	0.676956	-0.759972	-0.971992	-0.726186	-0.699005	49	517	316	471	317
1	imitans	10374	10374_H_08	10374_H_08_BL_01	herbar	10374_8_BL_herbar	BL	4N	2_apomictic_obligate_asexual	3	0.884697	1	1	1	1	1	1	forest	59.553	17.3861	41	1.494	0.507668	-0.689688	-0.907994	-0.801719	-1.04818	-1.3507	0.785623	-0.540787	-0.678229	0.315023	-0.00893437	-0.465034	-0.352787	-0.823211	-0.865166	-0.79021	-0.982706	0.676956	-0.759972	-0.971992	-0.726186	-0.699005	50	554	477	519	491
1	imitans	10374	10374_H_08	10374_H_08_RT_01	herbar	10374_8_herbar	RT	4N	2_apomictic_obligate_asexual	3	0.884697	1	1	1	1	1	1	forest	59.553	17.3861	41	1.494	0.507668	-0.689688	-0.907994	-0.801719	-1.04818	-1.3507	0.785623	-0.540787	-0.678229	0.315023	-0.00893437	-0.465034	-0.352787	-0.823211	-0.865166	-0.79021	-0.982706	0.676956	-0.759972	-0.971992	-0.726186	-0.699005	4497	646	1202	559	1213
1	imitans	10374	10374_H_08	10374_H_08_SL_01	herbar	10374_8_SL_herbar	SL	4N	2_apomictic_obligate_asexual	3	0.884697	1	1	1	1	1	1	forest	59.553	17.3861	41	1.494	0.507668	-0.689688	-0.907994	-0.801719	-1.04818	-1.3507	0.785623	-0.540787	-0.678229	0.315023	-0.00893437	-0.465034	-0.352787	-0.823211	-0.865166	-0.79021	-0.982706	0.676956	-0.759972	-0.971992	-0.726186	-0.699005	8312	1033	934	1025	927
1	imitans	10374	10374_H_09	10374_H_09_BL_01	herbar	10374_9_BL_herbar	BL	4N	2_apomictic_obligate_asexual	3	0.884697	1	1	1	1	1	1	forest	59.553	17.3861	41	1.494	0.507668	-0.689688	-0.907994	-0.801719	-1.04818	-1.3507	0.785623	-0.540787	-0.678229	0.315023	-0.00893437	-0.465034	-0.352787	-0.823211	-0.865166	-0.79021	-0.982706	0.676956	-0.759972	-0.971992	-0.726186	-0.699005	51	597	525	565	524
1	imitans	10374	10374_H_09	10374_H_09_RT_01	herbar	10374_9_herbar	RT	4N	2_apomictic_obligate_asexual	3	0.884697	1	1	1	1	1	1	forest	59.553	17.3861	41	1.494	0.507668	-0.689688	-0.907994	-0.801719	-1.04818	-1.3507	0.785623	-0.540787	-0.678229	0.315023	-0.00893437	-0.465034	-0.352787	-0.823211	-0.865166	-0.79021	-0.982706	0.676956	-0.759972	-0.971992	-0.726186	-0.699005	4498	553	1210	483	1203
1	imitans	10374	10374_H_09	10374_H_09_SL_01	herbar	10374_9_SL_herbar	SL	4N	2_apomictic_obligate_asexual	3	0.884697	1	1	1	1	1	1	forest	59.553	17.3861	41	1.494	0.507668	-0.689688	-0.907994	-0.801719	-1.04818	-1.3507	0.785623	-0.540787	-0.678229	0.315023	-0.00893437	-0.465034	-0.352787	-0.823211	-0.865166	-0.79021	-0.982706	0.676956	-0.759972	-0.971992	-0.726186	-0.699005	8313	813	821	805	821
1	imitans	10374	10374_H_11	10374_H_11_BL_01	herbar	10374_11_BL_herbar	BL	4N	2_apomictic_obligate_asexual	3	0.884697	1	1	1	1	1	1	forest	59.553	17.3861	41	1.494	0.507668	-0.689688	-0.907994	-0.801719	-1.04818	-1.3507	0.785623	-0.540787	-0.678229	0.315023	-0.00893437	-0.465034	-0.352787	-0.823211	-0.865166	-0.79021	-0.982706	0.676956	-0.759972	-0.971992	-0.726186	-0.699005	52	580	519	541	525
1	imitans	10374	10374_H_11	10374_H_11_RT_01	herbar	10374_11_herbar	RT	4N	2_apomictic_obligate_asexual	3	0.884697	1	1	1	1	1	1	forest	59.553	17.3861	41	1.494	0.507668	-0.689688	-0.907994	-0.801719	-1.04818	-1.3507	0.785623	-0.540787	-0.678229	0.315023	-0.00893437	-0.465034	-0.352787	-0.823211	-0.865166	-0.79021	-0.982706	0.676956	-0.759972	-0.971992	-0.726186	-0.699005	4499	613	1220	534	1210
1	imitans	10374	10374_H_11	10374_H_11_SL_01	herbar	10374_11_SL_herbar	SL	4N	2_apomictic_obligate_asexual	3	0.884697	1	1	1	1	1	1	forest	59.553	17.3861	41	1.494	0.507668	-0.689688	-0.907994	-0.801719	-1.04818	-1.3507	0.785623	-0.540787	-0.678229	0.315023	-0.00893437	-0.465034	-0.352787	-0.823211	-0.865166	-0.79021	-0.982706	0.676956	-0.759972	-0.971992	-0.726186	-0.699005	8314	862	830	856	823
1	imitans	10482	10482_G_01	10482_G_01_BL_01	garden	10482_1_BL_1_garden	BL	4N	2_apomictic_obligate_asexual	5	1.54288	1	1	1	1	1	1	forest	60.2458	23.8126	54	1.62372	1.55828	-0.654799	-1.22195	-1.4429	-0.770562	-1.60239	1.60748	-0.636681	-1.6362	1.31999	-0.221065	-0.928018	-0.646581	-1.6283	-0.556684	-0.494302	-0.84058	0.821935	-0.456273	-0.814519	-0.536038	-0.534533	230	782	427	748	455
1	imitans	10482	10482_G_01	10482_G_01_BL_02	garden	10482_1_BL_2_garden	BL	4N	2_apomictic_obligate_asexual	5	1.54288	1	1	1	1	1	1	forest	60.2458	23.8126	54	1.62372	1.55828	-0.654799	-1.22195	-1.4429	-0.770562	-1.60239	1.60748	-0.636681	-1.6362	1.31999	-0.221065	-0.928018	-0.646581	-1.6283	-0.556684	-0.494302	-0.84058	0.821935	-0.456273	-0.814519	-0.536038	-0.534533	231	1023	542	967	570
1	imitans	10482	10482_G_01	10482_G_01_RT_01	garden	10482_1_1	RT	4N	2_apomictic_obligate_asexual	5	1.54288	1	1	1	1	1	1	forest	60.2458	23.8126	54	1.62372	1.55828	-0.654799	-1.22195	-1.4429	-0.770562	-1.60239	1.60748	-0.636681	-1.6362	1.31999	-0.221065	-0.928018	-0.646581	-1.6283	-0.556684	-0.494302	-0.84058	0.821935	-0.456273	-0.814519	-0.536038	-0.534533	4661	1025	704	892	678
1	imitans	10482	10482_G_01	10482_G_01_RT_02	garden	10482_1_2	RT	4N	2_apomictic_obligate_asexual	5	1.54288	1	1	1	1	1	1	forest	60.2458	23.8126	54	1.62372	1.55828	-0.654799	-1.22195	-1.4429	-0.770562	-1.60239	1.60748	-0.636681	-1.6362	1.31999	-0.221065	-0.928018	-0.646581	-1.6283	-0.556684	-0.494302	-0.84058	0.821935	-0.456273	-0.814519	-0.536038	-0.534533	4662	1331	732	1193	696
1	imitans	10482	10482_G_01	10482_G_01_SL_01	garden	10482_1_SL_1_garden	SL	4N	2_apomictic_obligate_asexual	5	1.54288	1	1	1	1	1	1	forest	60.2458	23.8126	54	1.62372	1.55828	-0.654799	-1.22195	-1.4429	-0.770562	-1.60239	1.60748	-0.636681	-1.6362	1.31999	-0.221065	-0.928018	-0.646581	-1.6283	-0.556684	-0.494302	-0.84058	0.821935	-0.456273	-0.814519	-0.536038	-0.534533	8506	298	70	281	77
1	imitans	10482	10482_G_01	10482_G_01_SL_02	garden	10482_1_SL_2_garden	SL	4N	2_apomictic_obligate_asexual	5	1.54288	1	1	1	1	1	1	forest	60.2458	23.8126	54	1.62372	1.55828	-0.654799	-1.22195	-1.4429	-0.770562	-1.60239	1.60748	-0.636681	-1.6362	1.31999	-0.221065	-0.928018	-0.646581	-1.6283	-0.556684	-0.494302	-0.84058	0.821935	-0.456273	-0.814519	-0.536038	-0.534533	8507	246	164	228	173
1	imitans	10482	10482_G_01	10482_G_01_SL_03	garden	10482_1_SL_3_garden	SL	4N	2_apomictic_obligate_asexual	5	1.54288	1	1	1	1	1	1	forest	60.2458	23.8126	54	1.62372	1.55828	-0.654799	-1.22195	-1.4429	-0.770562	-1.60239	1.60748	-0.636681	-1.6362	1.31999	-0.221065	-0.928018	-0.646581	-1.6283	-0.556684	-0.494302	-0.84058	0.821935	-0.456273	-0.814519	-0.536038	-0.534533	8508	186	101	177	101
1	imitans	10482	10482_G_02	10482_G_02_BL_01	garden	10482_2_BL_1_garden	BL	4N	2_apomictic_obligate_asexual	5	1.54288	1	1	1	1	1	1	forest	60.2458	23.8126	54	1.62372	1.55828	-0.654799	-1.22195	-1.4429	-0.770562	-1.60239	1.60748	-0.636681	-1.6362	1.31999	-0.221065	-0.928018	-0.646581	-1.6283	-0.556684	-0.494302	-0.84058	0.821935	-0.456273	-0.814519	-0.536038	-0.534533	232	1093	519	1020	566
1	imitans	10482	10482_G_02	10482_G_02_RT_01	garden	10482_2_1	RT	4N	2_apomictic_obligate_asexual	5	1.54288	1	1	1	1	1	1	forest	60.2458	23.8126	54	1.62372	1.55828	-0.654799	-1.22195	-1.4429	-0.770562	-1.60239	1.60748	-0.636681	-1.6362	1.31999	-0.221065	-0.928018	-0.646581	-1.6283	-0.556684	-0.494302	-0.84058	0.821935	-0.456273	-0.814519	-0.536038	-0.534533	4663	1175	763	1058	745
1	imitans	10482	10482_G_02	10482_G_02_RT_02	garden	10482_2_2	RT	4N	2_apomictic_obligate_asexual	5	1.54288	1	1	1	1	1	1	forest	60.2458	23.8126	54	1.62372	1.55828	-0.654799	-1.22195	-1.4429	-0.770562	-1.60239	1.60748	-0.636681	-1.6362	1.31999	-0.221065	-0.928018	-0.646581	-1.6283	-0.556684	-0.494302	-0.84058	0.821935	-0.456273	-0.814519	-0.536038	-0.534533	4664	1087	551	939	530
1	imitans	10482	10482_G_02	10482_G_02_SL_01	garden	10482_2_SL_1_garden	SL	4N	2_apomictic_obligate_asexual	5	1.54288	1	1	1	1	1	1	forest	60.2458	23.8126	54	1.62372	1.55828	-0.654799	-1.22195	-1.4429	-0.770562	-1.60239	1.60748	-0.636681	-1.6362	1.31999	-0.221065	-0.928018	-0.646581	-1.6283	-0.556684	-0.494302	-0.84058	0.821935	-0.456273	-0.814519	-0.536038	-0.534533	8509	355	152	333	156
1	imitans	10482	10482_G_03	10482_G_03_BL_01	garden	10482_3_BL_1_garden	BL	4N	2_apomictic_obligate_asexual	5	1.54288	1	1	1	1	1	1	forest	60.2458	23.8126	54	1.62372	1.55828	-0.654799	-1.22195	-1.4429	-0.770562	-1.60239	1.60748	-0.636681	-1.6362	1.31999	-0.221065	-0.928018	-0.646581	-1.6283	-0.556684	-0.494302	-0.84058	0.821935	-0.456273	-0.814519	-0.536038	-0.534533	233	712	367	643	375
1	imitans	10482	10482_G_03	10482_G_03_BL_02	garden	10482_3_BL_2_garden	BL	4N	2_apomictic_obligate_asexual	5	1.54288	1	1	1	1	1	1	forest	60.2458	23.8126	54	1.62372	1.55828	-0.654799	-1.22195	-1.4429	-0.770562	-1.60239	1.60748	-0.636681	-1.6362	1.31999	-0.221065	-0.928018	-0.646581	-1.6283	-0.556684	-0.494302	-0.84058	0.821935	-0.456273	-0.814519	-0.536038	-0.534533	234	598	335	551	342
1	imitans	10482	10482_G_03	10482_G_03_BL_03	garden	10482_3_BL_3_garden	BL	4N	2_apomictic_obligate_asexual	5	1.54288	1	1	1	1	1	1	forest	60.2458	23.8126	54	1.62372	1.55828	-0.654799	-1.22195	-1.4429	-0.770562	-1.60239	1.60748	-0.636681	-1.6362	1.31999	-0.221065	-0.928018	-0.646581	-1.6283	-0.556684	-0.494302	-0.84058	0.821935	-0.456273	-0.814519	-0.536038	-0.534533	235	503	356	459	353
1	imitans	10482	10482_G_03	10482_G_03_RT_01	garden	10482_3_1	RT	4N	2_apomictic_obligate_asexual	5	1.54288	1	1	1	1	1	1	forest	60.2458	23.8126	54	1.62372	1.55828	-0.654799	-1.22195	-1.4429	-0.770562	-1.60239	1.60748	-0.636681	-1.6362	1.31999	-0.221065	-0.928018	-0.646581	-1.6283	-0.556684	-0.494302	-0.84058	0.821935	-0.456273	-0.814519	-0.536038	-0.534533	4665	1307	465	1154	488
1	imitans	10482	10482_G_03	10482_G_03_RT_02	garden	10482_3_2	RT	4N	2_apomictic_obligate_asexual	5	1.54288	1	1	1	1	1	1	forest	60.2458	23.8126	54	1.62372	1.55828	-0.654799	-1.22195	-1.4429	-0.770562	-1.60239	1.60748	-0.636681	-1.6362	1.31999	-0.221065	-0.928018	-0.646581	-1.6283	-0.556684	-0.494302	-0.84058	0.821935	-0.456273	-0.814519	-0.536038	-0.534533	4666	1463	348	1305	317
1	imitans	10482	10482_G_03	10482_G_03_SL_01	garden	10482_3_SL_1_garden	SL	4N	2_apomictic_obligate_asexual	5	1.54288	1	1	1	1	1	1	forest	60.2458	23.8126	54	1.62372	1.55828	-0.654799	-1.22195	-1.4429	-0.770562	-1.60239	1.60748	-0.636681	-1.6362	1.31999	-0.221065	-0.928018	-0.646581	-1.6283	-0.556684	-0.494302	-0.84058	0.821935	-0.456273	-0.814519	-0.536038	-0.534533	8510	347	87	345	82
1	imitans	10482	10482_G_03	10482_G_03_SL_02	garden	10482_3_SL_2_garden	SL	4N	2_apomictic_obligate_asexual	5	1.54288	1	1	1	1	1	1	forest	60.2458	23.8126	54	1.62372	1.55828	-0.654799	-1.22195	-1.4429	-0.770562	-1.60239	1.60748	-0.636681	-1.6362	1.31999	-0.221065	-0.928018	-0.646581	-1.6283	-0.556684	-0.494302	-0.84058	0.821935	-0.456273	-0.814519	-0.536038	-0.534533	8511	144	61	133	65
1	imitans	10482	10482_G_04	10482_G_04_BL_01	garden	10482_4_BL_1_garden	BL	4N	2_apomictic_obligate_asexual	5	1.54288	1	1	1	1	1	1	forest	60.2458	23.8126	54	1.62372	1.55828	-0.654799	-1.22195	-1.4429	-0.770562	-1.60239	1.60748	-0.636681	-1.6362	1.31999	-0.221065	-0.928018	-0.646581	-1.6283	-0.556684	-0.494302	-0.84058	0.821935	-0.456273	-0.814519	-0.536038	-0.534533	236	836	338	771	346
1	imitans	10482	10482_G_04	10482_G_04_BL_02	garden	10482_4_BL_2_garden	BL	4N	2_apomictic_obligate_asexual	5	1.54288	1	1	1	1	1	1	forest	60.2458	23.8126	54	1.62372	1.55828	-0.654799	-1.22195	-1.4429	-0.770562	-1.60239	1.60748	-0.636681	-1.6362	1.31999	-0.221065	-0.928018	-0.646581	-1.6283	-0.556684	-0.494302	-0.84058	0.821935	-0.456273	-0.814519	-0.536038	-0.534533	237	820	360	754	358
1	imitans	10482	10482_G_04	10482_G_04_BL_03	garden	10482_4_BL_3_garden	BL	4N	2_apomictic_obligate_asexual	5	1.54288	1	1	1	1	1	1	forest	60.2458	23.8126	54	1.62372	1.55828	-0.654799	-1.22195	-1.4429	-0.770562	-1.60239	1.60748	-0.636681	-1.6362	1.31999	-0.221065	-0.928018	-0.646581	-1.6283	-0.556684	-0.494302	-0.84058	0.821935	-0.456273	-0.814519	-0.536038	-0.534533	238	810	345	717	385
1	imitans	10482	10482_G_04	10482_G_04_SL_01	garden	10482_4_SL_1_garden	SL	4N	2_apomictic_obligate_asexual	5	1.54288	1	1	1	1	1	1	forest	60.2458	23.8126	54	1.62372	1.55828	-0.654799	-1.22195	-1.4429	-0.770562	-1.60239	1.60748	-0.636681	-1.6362	1.31999	-0.221065	-0.928018	-0.646581	-1.6283	-0.556684	-0.494302	-0.84058	0.821935	-0.456273	-0.814519	-0.536038	-0.534533	8512	252	128	238	129
1	imitans	10482	10482_G_04	10482_G_04_SL_02	garden	10482_4_SL_2_garden	SL	4N	2_apomictic_obligate_asexual	5	1.54288	1	1	1	1	1	1	forest	60.2458	23.8126	54	1.62372	1.55828	-0.654799	-1.22195	-1.4429	-0.770562	-1.60239	1.60748	-0.636681	-1.6362	1.31999	-0.221065	-0.928018	-0.646581	-1.6283	-0.556684	-0.494302	-0.84058	0.821935	-0.456273	-0.814519	-0.536038	-0.534533	8513	263	90	250	90
1	imitans	10482	10482_G_04	10482_G_04_SL_03	garden	10482_4_SL_3_garden	SL	4N	2_apomictic_obligate_asexual	5	1.54288	1	1	1	1	1	1	forest	60.2458	23.8126	54	1.62372	1.55828	-0.654799	-1.22195	-1.4429	-0.770562	-1.60239	1.60748	-0.636681	-1.6362	1.31999	-0.221065	-0.928018	-0.646581	-1.6283	-0.556684	-0.494302	-0.84058	0.821935	-0.456273	-0.814519	-0.536038	-0.534533	8514	187	142	180	158
1	imitans	10482	10482_G_05	10482_G_05_BL_01	garden	10482_5_BL_1_garden	BL	4N	2_apomictic_obligate_asexual	5	1.54288	1	1	1	1	1	1	forest	60.2458	23.8126	54	1.62372	1.55828	-0.654799	-1.22195	-1.4429	-0.770562	-1.60239	1.60748	-0.636681	-1.6362	1.31999	-0.221065	-0.928018	-0.646581	-1.6283	-0.556684	-0.494302	-0.84058	0.821935	-0.456273	-0.814519	-0.536038	-0.534533	239	815	384	733	405
1	imitans	10482	10482_G_05	10482_G_05_BL_02	garden	10482_5_BL_2_garden	BL	4N	2_apomictic_obligate_asexual	5	1.54288	1	1	1	1	1	1	forest	60.2458	23.8126	54	1.62372	1.55828	-0.654799	-1.22195	-1.4429	-0.770562	-1.60239	1.60748	-0.636681	-1.6362	1.31999	-0.221065	-0.928018	-0.646581	-1.6283	-0.556684	-0.494302	-0.84058	0.821935	-0.456273	-0.814519	-0.536038	-0.534533	240	638	343	588	355
1	imitans	10482	10482_G_05	10482_G_05_SL_01	garden	10482_5_SL_1_garden	SL	4N	2_apomictic_obligate_asexual	5	1.54288	1	1	1	1	1	1	forest	60.2458	23.8126	54	1.62372	1.55828	-0.654799	-1.22195	-1.4429	-0.770562	-1.60239	1.60748	-0.636681	-1.6362	1.31999	-0.221065	-0.928018	-0.646581	-1.6283	-0.556684	-0.494302	-0.84058	0.821935	-0.456273	-0.814519	-0.536038	-0.534533	8515	227	162	208	172
1	imitans	10482	10482_G_05	10482_G_05_SL_02	garden	10482_5_SL_2_garden	SL	4N	2_apomictic_obligate_asexual	5	1.54288	1	1	1	1	1	1	forest	60.2458	23.8126	54	1.62372	1.55828	-0.654799	-1.22195	-1.4429	-0.770562	-1.60239	1.60748	-0.636681	-1.6362	1.31999	-0.221065	-0.928018	-0.646581	-1.6283	-0.556684	-0.494302	-0.84058	0.821935	-0.456273	-0.814519	-0.536038	-0.534533	8516	254	144	242	147
1	imitans	10482	10482_G_05	10482_G_05_SL_03	garden	10482_5_SL_3_garden	SL	4N	2_apomictic_obligate_asexual	5	1.54288	1	1	1	1	1	1	forest	60.2458	23.8126	54	1.62372	1.55828	-0.654799	-1.22195	-1.4429	-0.770562	-1.60239	1.60748	-0.636681	-1.6362	1.31999	-0.221065	-0.928018	-0.646581	-1.6283	-0.556684	-0.494302	-0.84058	0.821935	-0.456273	-0.814519	-0.536038	-0.534533	8517	214	105	200	108
1	imitans	10482	10482_G_06	10482_G_06_BL_01	garden	10482_6_BL_1_garden	BL	4N	2_apomictic_obligate_asexual	5	1.54288	1	1	1	1	1	1	forest	60.2458	23.8126	54	1.62372	1.55828	-0.654799	-1.22195	-1.4429	-0.770562	-1.60239	1.60748	-0.636681	-1.6362	1.31999	-0.221065	-0.928018	-0.646581	-1.6283	-0.556684	-0.494302	-0.84058	0.821935	-0.456273	-0.814519	-0.536038	-0.534533	241	697	365	631	385
1	imitans	10482	10482_G_06	10482_G_06_BL_02	garden	10482_6_BL_2_garden	BL	4N	2_apomictic_obligate_asexual	5	1.54288	1	1	1	1	1	1	forest	60.2458	23.8126	54	1.62372	1.55828	-0.654799	-1.22195	-1.4429	-0.770562	-1.60239	1.60748	-0.636681	-1.6362	1.31999	-0.221065	-0.928018	-0.646581	-1.6283	-0.556684	-0.494302	-0.84058	0.821935	-0.456273	-0.814519	-0.536038	-0.534533	242	589	405	575	413
1	imitans	10482	10482_G_06	10482_G_06_RT_01	garden	10482_6_1_garden	RT	4N	2_apomictic_obligate_asexual	5	1.54288	1	1	1	1	1	1	forest	60.2458	23.8126	54	1.62372	1.55828	-0.654799	-1.22195	-1.4429	-0.770562	-1.60239	1.60748	-0.636681	-1.6362	1.31999	-0.221065	-0.928018	-0.646581	-1.6283	-0.556684	-0.494302	-0.84058	0.821935	-0.456273	-0.814519	-0.536038	-0.534533	4667	502	1188	425	1208
1	imitans	10482	10482_G_06	10482_G_06_RT_01	garden	10482_6_1_garden	RT	4N	2_apomictic_obligate_asexual	5	1.54288	1	1	1	1	1	1	forest	60.2458	23.8126	54	1.62372	1.55828	-0.654799	-1.22195	-1.4429	-0.770562	-1.60239	1.60748	-0.636681	-1.6362	1.31999	-0.221065	-0.928018	-0.646581	-1.6283	-0.556684	-0.494302	-0.84058	0.821935	-0.456273	-0.814519	-0.536038	-0.534533	4668	939	576	787	585
1	imitans	10482	10482_G_06	10482_G_06_RT_02	garden	10482_6_2_garden	RT	4N	2_apomictic_obligate_asexual	5	1.54288	1	1	1	1	1	1	forest	60.2458	23.8126	54	1.62372	1.55828	-0.654799	-1.22195	-1.4429	-0.770562	-1.60239	1.60748	-0.636681	-1.6362	1.31999	-0.221065	-0.928018	-0.646581	-1.6283	-0.556684	-0.494302	-0.84058	0.821935	-0.456273	-0.814519	-0.536038	-0.534533	4669	768	1051	674	1094
1	imitans	10482	10482_G_06	10482_G_06_RT_02	garden	10482_6_2_garden	RT	4N	2_apomictic_obligate_asexual	5	1.54288	1	1	1	1	1	1	forest	60.2458	23.8126	54	1.62372	1.55828	-0.654799	-1.22195	-1.4429	-0.770562	-1.60239	1.60748	-0.636681	-1.6362	1.31999	-0.221065	-0.928018	-0.646581	-1.6283	-0.556684	-0.494302	-0.84058	0.821935	-0.456273	-0.814519	-0.536038	-0.534533	4670	1409	342	1230	368
1	imitans	10482	10482_G_06	10482_G_06_SL_01	garden	10482_6_SL_1_garden	SL	4N	2_apomictic_obligate_asexual	5	1.54288	1	1	1	1	1	1	forest	60.2458	23.8126	54	1.62372	1.55828	-0.654799	-1.22195	-1.4429	-0.770562	-1.60239	1.60748	-0.636681	-1.6362	1.31999	-0.221065	-0.928018	-0.646581	-1.6283	-0.556684	-0.494302	-0.84058	0.821935	-0.456273	-0.814519	-0.536038	-0.534533	8518	262	147	244	148
1	imitans	10482	10482_G_06	10482_G_06_SL_02	garden	10482_6_SL_2_garden	SL	4N	2_apomictic_obligate_asexual	5	1.54288	1	1	1	1	1	1	forest	60.2458	23.8126	54	1.62372	1.55828	-0.654799	-1.22195	-1.4429	-0.770562	-1.60239	1.60748	-0.636681	-1.6362	1.31999	-0.221065	-0.928018	-0.646581	-1.6283	-0.556684	-0.494302	-0.84058	0.821935	-0.456273	-0.814519	-0.536038	-0.534533	8519	164	133	155	131
1	imitans	10482	10482_G_06	10482_G_06_SL_03	garden	10482_6_SL_3_garden	SL	4N	2_apomictic_obligate_asexual	5	1.54288	1	1	1	1	1	1	forest	60.2458	23.8126	54	1.62372	1.55828	-0.654799	-1.22195	-1.4429	-0.770562	-1.60239	1.60748	-0.636681	-1.6362	1.31999	-0.221065	-0.928018	-0.646581	-1.6283	-0.556684	-0.494302	-0.84058	0.821935	-0.456273	-0.814519	-0.536038	-0.534533	8520	267	161	241	162
1	imitans	10482	10482_H_07	10482_H_07_BL_01	herbar	10482_7_BL_herbar	BL	4N	2_apomictic_obligate_asexual	5	1.54288	1	1	1	1	1	1	forest	60.2458	23.8126	54	1.62372	1.55828	-0.654799	-1.22195	-1.4429	-0.770562	-1.60239	1.60748	-0.636681	-1.6362	1.31999	-0.221065	-0.928018	-0.646581	-1.6283	-0.556684	-0.494302	-0.84058	0.821935	-0.456273	-0.814519	-0.536038	-0.534533	243	1292	730	1227	724
1	imitans	10482	10482_H_07	10482_H_07_RT_01	herbar	10482_7_herbar	RT	4N	2_apomictic_obligate_asexual	5	1.54288	1	1	1	1	1	1	forest	60.2458	23.8126	54	1.62372	1.55828	-0.654799	-1.22195	-1.4429	-0.770562	-1.60239	1.60748	-0.636681	-1.6362	1.31999	-0.221065	-0.928018	-0.646581	-1.6283	-0.556684	-0.494302	-0.84058	0.821935	-0.456273	-0.814519	-0.536038	-0.534533	4671	642	1101	548	1095
1	imitans	10482	10482_H_07	10482_H_07_SL_01	herbar	10482_7_SL_herbar	SL	4N	2_apomictic_obligate_asexual	5	1.54288	1	1	1	1	1	1	forest	60.2458	23.8126	54	1.62372	1.55828	-0.654799	-1.22195	-1.4429	-0.770562	-1.60239	1.60748	-0.636681	-1.6362	1.31999	-0.221065	-0.928018	-0.646581	-1.6283	-0.556684	-0.494302	-0.84058	0.821935	-0.456273	-0.814519	-0.536038	-0.534533	8521	920	582	912	582
1	imitans	10482	10482_H_08	10482_H_08_BL_01	herbar	10482_8_BL_herbar	BL	4N	2_apomictic_obligate_asexual	5	1.54288	1	1	1	1	1	1	forest	60.2458	23.8126	54	1.62372	1.55828	-0.654799	-1.22195	-1.4429	-0.770562	-1.60239	1.60748	-0.636681	-1.6362	1.31999	-0.221065	-0.928018	-0.646581	-1.6283	-0.556684	-0.494302	-0.84058	0.821935	-0.456273	-0.814519	-0.536038	-0.534533	244	778	566	729	587
1	imitans	10482	10482_H_08	10482_H_08_RT_01	herbar	10482_8_herbar	RT	4N	2_apomictic_obligate_asexual	5	1.54288	1	1	1	1	1	1	forest	60.2458	23.8126	54	1.62372	1.55828	-0.654799	-1.22195	-1.4429	-0.770562	-1.60239	1.60748	-0.636681	-1.6362	1.31999	-0.221065	-0.928018	-0.646581	-1.6283	-0.556684	-0.494302	-0.84058	0.821935	-0.456273	-0.814519	-0.536038	-0.534533	4672	713	1095	605	1105
1	imitans	10482	10482_H_08	10482_H_08_SL_01	herbar	10482_8_SL_herbar	SL	4N	2_apomictic_obligate_asexual	5	1.54288	1	1	1	1	1	1	forest	60.2458	23.8126	54	1.62372	1.55828	-0.654799	-1.22195	-1.4429	-0.770562	-1.60239	1.60748	-0.636681	-1.6362	1.31999	-0.221065	-0.928018	-0.646581	-1.6283	-0.556684	-0.494302	-0.84058	0.821935	-0.456273	-0.814519	-0.536038	-0.534533	8522	912	658	908	660
1	imitans	10482	10482_H_09	10482_H_09_BL_01	herbar	10482_9_BL_herbar	BL	4N	2_apomictic_obligate_asexual	5	1.54288	1	1	1	1	1	1	forest	60.2458	23.8126	54	1.62372	1.55828	-0.654799	-1.22195	-1.4429	-0.770562	-1.60239	1.60748	-0.636681	-1.6362	1.31999	-0.221065	-0.928018	-0.646581	-1.6283	-0.556684	-0.494302	-0.84058	0.821935	-0.456273	-0.814519	-0.536038	-0.534533	245	1061	759	986	772
1	imitans	10482	10482_H_09	10482_H_09_RT_01	herbar	10482_9_herbar	RT	4N	2_apomictic_obligate_asexual	5	1.54288	1	1	1	1	1	1	forest	60.2458	23.8126	54	1.62372	1.55828	-0.654799	-1.22195	-1.4429	-0.770562	-1.60239	1.60748	-0.636681	-1.6362	1.31999	-0.221065	-0.928018	-0.646581	-1.6283	-0.556684	-0.494302	-0.84058	0.821935	-0.456273	-0.814519	-0.536038	-0.534533	4673	891	961	774	951
1	imitans	10482	10482_H_09	10482_H_09_SL_01	herbar	10482_9_SL_herbar	SL	4N	2_apomictic_obligate_asexual	5	1.54288	1	1	1	1	1	1	forest	60.2458	23.8126	54	1.62372	1.55828	-0.654799	-1.22195	-1.4429	-0.770562	-1.60239	1.60748	-0.636681	-1.6362	1.31999	-0.221065	-0.928018	-0.646581	-1.6283	-0.556684	-0.494302	-0.84058	0.821935	-0.456273	-0.814519	-0.536038	-0.534533	8523	1205	1039	1202	1047
1	marginicolus	KK259	KK259_G_01	KK259_G_01_BL_01	garden	KK259_01_BL_1_garden	BL	6N	3_apomictic_facultative_sexual	10	2.28858	1	1	1	NA	NA	NA	forest	50.3385	20.1636	294	-0.231194	0.96173	-0.0106818	-0.235643	-0.209862	0.525014	-0.343942	1.16538	0.0345752	-1.104	1.27979	0.536545	-0.928018	-0.000234099	-0.90372	-0.118838	0.477966	-0.627392	2.12675	0.606671	-0.589559	0.85838	-0.822359	353	663	399	629	417
1	marginicolus	KK259	KK259_G_01	KK259_G_01_BL_02	garden	KK259_01_BL_2_garden	BL	6N	3_apomictic_facultative_sexual	10	2.28858	1	1	1	NA	NA	NA	forest	50.3385	20.1636	294	-0.231194	0.96173	-0.0106818	-0.235643	-0.209862	0.525014	-0.343942	1.16538	0.0345752	-1.104	1.27979	0.536545	-0.928018	-0.000234099	-0.90372	-0.118838	0.477966	-0.627392	2.12675	0.606671	-0.589559	0.85838	-0.822359	354	625	367	572	375
1	marginicolus	KK259	KK259_G_01	KK259_G_01_BL_03	garden	KK259_01_BL_3_garden	BL	6N	3_apomictic_facultative_sexual	10	2.28858	1	1	1	NA	NA	NA	forest	50.3385	20.1636	294	-0.231194	0.96173	-0.0106818	-0.235643	-0.209862	0.525014	-0.343942	1.16538	0.0345752	-1.104	1.27979	0.536545	-0.928018	-0.000234099	-0.90372	-0.118838	0.477966	-0.627392	2.12675	0.606671	-0.589559	0.85838	-0.822359	355	429	195	398	207
1	marginicolus	KK259	KK259_G_01	KK259_G_01_SL_01	garden	KK259_01_SL_1_garden	SL	6N	3_apomictic_facultative_sexual	10	2.28858	1	1	1	NA	NA	NA	forest	50.3385	20.1636	294	-0.231194	0.96173	-0.0106818	-0.235643	-0.209862	0.525014	-0.343942	1.16538	0.0345752	-1.104	1.27979	0.536545	-0.928018	-0.000234099	-0.90372	-0.118838	0.477966	-0.627392	2.12675	0.606671	-0.589559	0.85838	-0.822359	8640	141	65	123	61
1	marginicolus	KK259	KK259_G_01	KK259_G_01_SL_02	garden	KK259_01_SL_2_garden	SL	6N	3_apomictic_facultative_sexual	10	2.28858	1	1	1	NA	NA	NA	forest	50.3385	20.1636	294	-0.231194	0.96173	-0.0106818	-0.235643	-0.209862	0.525014	-0.343942	1.16538	0.0345752	-1.104	1.27979	0.536545	-0.928018	-0.000234099	-0.90372	-0.118838	0.477966	-0.627392	2.12675	0.606671	-0.589559	0.85838	-0.822359	8641	180	44	167	43
1	marginicolus	KK259	KK259_G_01	KK259_G_01_SL_03	garden	KK259_01_SL_3_garden	SL	6N	3_apomictic_facultative_sexual	10	2.28858	1	1	1	NA	NA	NA	forest	50.3385	20.1636	294	-0.231194	0.96173	-0.0106818	-0.235643	-0.209862	0.525014	-0.343942	1.16538	0.0345752	-1.104	1.27979	0.536545	-0.928018	-0.000234099	-0.90372	-0.118838	0.477966	-0.627392	2.12675	0.606671	-0.589559	0.85838	-0.822359	8642	42	41	21	58
1	marginicolus	KK259	KK259_G_02	KK259_G_02_BL_01	garden	KK259_02_BL_1_garden	BL	6N	3_apomictic_facultative_sexual	10	2.28858	1	1	1	NA	NA	NA	forest	50.3385	20.1636	294	-0.231194	0.96173	-0.0106818	-0.235643	-0.209862	0.525014	-0.343942	1.16538	0.0345752	-1.104	1.27979	0.536545	-0.928018	-0.000234099	-0.90372	-0.118838	0.477966	-0.627392	2.12675	0.606671	-0.589559	0.85838	-0.822359	356	639	330	600	343
1	marginicolus	KK259	KK259_G_02	KK259_G_02_BL_02	garden	KK259_02_BL_2_garden	BL	6N	3_apomictic_facultative_sexual	10	2.28858	1	1	1	NA	NA	NA	forest	50.3385	20.1636	294	-0.231194	0.96173	-0.0106818	-0.235643	-0.209862	0.525014	-0.343942	1.16538	0.0345752	-1.104	1.27979	0.536545	-0.928018	-0.000234099	-0.90372	-0.118838	0.477966	-0.627392	2.12675	0.606671	-0.589559	0.85838	-0.822359	357	611	384	570	403
1	marginicolus	KK259	KK259_G_02	KK259_G_02_RT_01	garden	KK259_02_1_garden	RT	6N	3_apomictic_facultative_sexual	10	2.28858	1	1	1	NA	NA	NA	forest	50.3385	20.1636	294	-0.231194	0.96173	-0.0106818	-0.235643	-0.209862	0.525014	-0.343942	1.16538	0.0345752	-1.104	1.27979	0.536545	-0.928018	-0.000234099	-0.90372	-0.118838	0.477966	-0.627392	2.12675	0.606671	-0.589559	0.85838	-0.822359	4787	318	1196	247	1187
1	marginicolus	KK259	KK259_G_02	KK259_G_02_RT_01	garden	KK259_02_1_garden	RT	6N	3_apomictic_facultative_sexual	10	2.28858	1	1	1	NA	NA	NA	forest	50.3385	20.1636	294	-0.231194	0.96173	-0.0106818	-0.235643	-0.209862	0.525014	-0.343942	1.16538	0.0345752	-1.104	1.27979	0.536545	-0.928018	-0.000234099	-0.90372	-0.118838	0.477966	-0.627392	2.12675	0.606671	-0.589559	0.85838	-0.822359	4788	573	573	474	548
1	marginicolus	KK259	KK259_G_02	KK259_G_02_RT_02	garden	KK259_02_2_garden	RT	6N	3_apomictic_facultative_sexual	10	2.28858	1	1	1	NA	NA	NA	forest	50.3385	20.1636	294	-0.231194	0.96173	-0.0106818	-0.235643	-0.209862	0.525014	-0.343942	1.16538	0.0345752	-1.104	1.27979	0.536545	-0.928018	-0.000234099	-0.90372	-0.118838	0.477966	-0.627392	2.12675	0.606671	-0.589559	0.85838	-0.822359	4789	799	1029	727	965
1	marginicolus	KK259	KK259_G_02	KK259_G_02_RT_02	garden	KK259_02_2_garden	RT	6N	3_apomictic_facultative_sexual	10	2.28858	1	1	1	NA	NA	NA	forest	50.3385	20.1636	294	-0.231194	0.96173	-0.0106818	-0.235643	-0.209862	0.525014	-0.343942	1.16538	0.0345752	-1.104	1.27979	0.536545	-0.928018	-0.000234099	-0.90372	-0.118838	0.477966	-0.627392	2.12675	0.606671	-0.589559	0.85838	-0.822359	4790	1469	277	1384	151
1	marginicolus	KK259	KK259_G_02	KK259_G_02_SL_01	garden	KK259_02_SL_1_garden	SL	6N	3_apomictic_facultative_sexual	10	2.28858	1	1	1	NA	NA	NA	forest	50.3385	20.1636	294	-0.231194	0.96173	-0.0106818	-0.235643	-0.209862	0.525014	-0.343942	1.16538	0.0345752	-1.104	1.27979	0.536545	-0.928018	-0.000234099	-0.90372	-0.118838	0.477966	-0.627392	2.12675	0.606671	-0.589559	0.85838	-0.822359	8643	138	54	121	58
1	marginicolus	KK259	KK259_G_02	KK259_G_02_SL_03	garden	KK259_02_SL_3_garden	SL	6N	3_apomictic_facultative_sexual	10	2.28858	1	1	1	NA	NA	NA	forest	50.3385	20.1636	294	-0.231194	0.96173	-0.0106818	-0.235643	-0.209862	0.525014	-0.343942	1.16538	0.0345752	-1.104	1.27979	0.536545	-0.928018	-0.000234099	-0.90372	-0.118838	0.477966	-0.627392	2.12675	0.606671	-0.589559	0.85838	-0.822359	8644	81	29	62	40
1	marginicolus	KK259	KK259_G_02	KK259_G_02_SL_04	garden	KK259_02_SL_4_garden	SL	6N	3_apomictic_facultative_sexual	10	2.28858	1	1	1	NA	NA	NA	forest	50.3385	20.1636	294	-0.231194	0.96173	-0.0106818	-0.235643	-0.209862	0.525014	-0.343942	1.16538	0.0345752	-1.104	1.27979	0.536545	-0.928018	-0.000234099	-0.90372	-0.118838	0.477966	-0.627392	2.12675	0.606671	-0.589559	0.85838	-0.822359	8645	208	56	192	56
1	marginicolus	KK259	KK259_G_03	KK259_G_03_BL_01	garden	KK259_03_BL_1_garden	BL	6N	3_apomictic_facultative_sexual	10	2.28858	1	1	1	NA	NA	NA	forest	50.3385	20.1636	294	-0.231194	0.96173	-0.0106818	-0.235643	-0.209862	0.525014	-0.343942	1.16538	0.0345752	-1.104	1.27979	0.536545	-0.928018	-0.000234099	-0.90372	-0.118838	0.477966	-0.627392	2.12675	0.606671	-0.589559	0.85838	-0.822359	358	547	286	508	306
1	marginicolus	KK259	KK259_G_03	KK259_G_03_BL_02	garden	KK259_03_BL_2_garden	BL	6N	3_apomictic_facultative_sexual	10	2.28858	1	1	1	NA	NA	NA	forest	50.3385	20.1636	294	-0.231194	0.96173	-0.0106818	-0.235643	-0.209862	0.525014	-0.343942	1.16538	0.0345752	-1.104	1.27979	0.536545	-0.928018	-0.000234099	-0.90372	-0.118838	0.477966	-0.627392	2.12675	0.606671	-0.589559	0.85838	-0.822359	359	572	294	515	303
1	marginicolus	KK259	KK259_G_03	KK259_G_03_BL_03	garden	KK259_03_BL_3_garden	BL	6N	3_apomictic_facultative_sexual	10	2.28858	1	1	1	NA	NA	NA	forest	50.3385	20.1636	294	-0.231194	0.96173	-0.0106818	-0.235643	-0.209862	0.525014	-0.343942	1.16538	0.0345752	-1.104	1.27979	0.536545	-0.928018	-0.000234099	-0.90372	-0.118838	0.477966	-0.627392	2.12675	0.606671	-0.589559	0.85838	-0.822359	360	562	329	520	339
1	marginicolus	KK259	KK259_G_03	KK259_G_03_RT_01	garden	KK259_03_1_garden	RT	6N	3_apomictic_facultative_sexual	10	2.28858	1	1	1	NA	NA	NA	forest	50.3385	20.1636	294	-0.231194	0.96173	-0.0106818	-0.235643	-0.209862	0.525014	-0.343942	1.16538	0.0345752	-1.104	1.27979	0.536545	-0.928018	-0.000234099	-0.90372	-0.118838	0.477966	-0.627392	2.12675	0.606671	-0.589559	0.85838	-0.822359	4791	777	1017	703	943
1	marginicolus	KK259	KK259_G_03	KK259_G_03_RT_01	garden	KK259_03_1_garden	RT	6N	3_apomictic_facultative_sexual	10	2.28858	1	1	1	NA	NA	NA	forest	50.3385	20.1636	294	-0.231194	0.96173	-0.0106818	-0.235643	-0.209862	0.525014	-0.343942	1.16538	0.0345752	-1.104	1.27979	0.536545	-0.928018	-0.000234099	-0.90372	-0.118838	0.477966	-0.627392	2.12675	0.606671	-0.589559	0.85838	-0.822359	4792	1424	224	1320	94
1	marginicolus	KK259	KK259_G_03	KK259_G_03_RT_02	garden	KK259_03_2_garden	RT	6N	3_apomictic_facultative_sexual	10	2.28858	1	1	1	NA	NA	NA	forest	50.3385	20.1636	294	-0.231194	0.96173	-0.0106818	-0.235643	-0.209862	0.525014	-0.343942	1.16538	0.0345752	-1.104	1.27979	0.536545	-0.928018	-0.000234099	-0.90372	-0.118838	0.477966	-0.627392	2.12675	0.606671	-0.589559	0.85838	-0.822359	4793	979	1238	947	1153
1	marginicolus	KK259	KK259_G_03	KK259_G_03_RT_02	garden	KK259_03_2_garden	RT	6N	3_apomictic_facultative_sexual	10	2.28858	1	1	1	NA	NA	NA	forest	50.3385	20.1636	294	-0.231194	0.96173	-0.0106818	-0.235643	-0.209862	0.525014	-0.343942	1.16538	0.0345752	-1.104	1.27979	0.536545	-0.928018	-0.000234099	-0.90372	-0.118838	0.477966	-0.627392	2.12675	0.606671	-0.589559	0.85838	-0.822359	4794	1813	644	1766	512
1	marginicolus	KK259	KK259_G_03	KK259_G_03_SL_01	garden	KK259_03_SL_1_garden	SL	6N	3_apomictic_facultative_sexual	10	2.28858	1	1	1	NA	NA	NA	forest	50.3385	20.1636	294	-0.231194	0.96173	-0.0106818	-0.235643	-0.209862	0.525014	-0.343942	1.16538	0.0345752	-1.104	1.27979	0.536545	-0.928018	-0.000234099	-0.90372	-0.118838	0.477966	-0.627392	2.12675	0.606671	-0.589559	0.85838	-0.822359	8646	179	36	163	33
1	marginicolus	KK259	KK259_G_03	KK259_G_03_SL_02	garden	KK259_03_SL_2_garden	SL	6N	3_apomictic_facultative_sexual	10	2.28858	1	1	1	NA	NA	NA	forest	50.3385	20.1636	294	-0.231194	0.96173	-0.0106818	-0.235643	-0.209862	0.525014	-0.343942	1.16538	0.0345752	-1.104	1.27979	0.536545	-0.928018	-0.000234099	-0.90372	-0.118838	0.477966	-0.627392	2.12675	0.606671	-0.589559	0.85838	-0.822359	8647	200	73	190	66
1	marginicolus	KK259	KK259_G_03	KK259_G_03_SL_03	garden	KK259_03_SL_3_garden	SL	6N	3_apomictic_facultative_sexual	10	2.28858	1	1	1	NA	NA	NA	forest	50.3385	20.1636	294	-0.231194	0.96173	-0.0106818	-0.235643	-0.209862	0.525014	-0.343942	1.16538	0.0345752	-1.104	1.27979	0.536545	-0.928018	-0.000234099	-0.90372	-0.118838	0.477966	-0.627392	2.12675	0.606671	-0.589559	0.85838	-0.822359	8648	210	58	195	55
1	marginicolus	KK259	KK259_G_04	KK259_G_04_BL_01	garden	KK259_04_BL_1_garden	BL	6N	3_apomictic_facultative_sexual	10	2.28858	1	1	1	NA	NA	NA	forest	50.3385	20.1636	294	-0.231194	0.96173	-0.0106818	-0.235643	-0.209862	0.525014	-0.343942	1.16538	0.0345752	-1.104	1.27979	0.536545	-0.928018	-0.000234099	-0.90372	-0.118838	0.477966	-0.627392	2.12675	0.606671	-0.589559	0.85838	-0.822359	361	445	231	403	248
1	marginicolus	KK259	KK259_G_04	KK259_G_04_BL_02	garden	KK259_04_BL_2_garden	BL	6N	3_apomictic_facultative_sexual	10	2.28858	1	1	1	NA	NA	NA	forest	50.3385	20.1636	294	-0.231194	0.96173	-0.0106818	-0.235643	-0.209862	0.525014	-0.343942	1.16538	0.0345752	-1.104	1.27979	0.536545	-0.928018	-0.000234099	-0.90372	-0.118838	0.477966	-0.627392	2.12675	0.606671	-0.589559	0.85838	-0.822359	362	689	286	628	308
1	marginicolus	KK259	KK259_G_04	KK259_G_04_BL_03	garden	KK259_04_BL_3_garden	BL	6N	3_apomictic_facultative_sexual	10	2.28858	1	1	1	NA	NA	NA	forest	50.3385	20.1636	294	-0.231194	0.96173	-0.0106818	-0.235643	-0.209862	0.525014	-0.343942	1.16538	0.0345752	-1.104	1.27979	0.536545	-0.928018	-0.000234099	-0.90372	-0.118838	0.477966	-0.627392	2.12675	0.606671	-0.589559	0.85838	-0.822359	363	554	326	493	353
1	marginicolus	KK259	KK259_G_04	KK259_G_04_RT_01	garden	KK259_04_1_garden	RT	6N	3_apomictic_facultative_sexual	10	2.28858	1	1	1	NA	NA	NA	forest	50.3385	20.1636	294	-0.231194	0.96173	-0.0106818	-0.235643	-0.209862	0.525014	-0.343942	1.16538	0.0345752	-1.104	1.27979	0.536545	-0.928018	-0.000234099	-0.90372	-0.118838	0.477966	-0.627392	2.12675	0.606671	-0.589559	0.85838	-0.822359	4795	603	977	527	983
1	marginicolus	KK259	KK259_G_04	KK259_G_04_RT_01	garden	KK259_04_1_garden	RT	6N	3_apomictic_facultative_sexual	10	2.28858	1	1	1	NA	NA	NA	forest	50.3385	20.1636	294	-0.231194	0.96173	-0.0106818	-0.235643	-0.209862	0.525014	-0.343942	1.16538	0.0345752	-1.104	1.27979	0.536545	-0.928018	-0.000234099	-0.90372	-0.118838	0.477966	-0.627392	2.12675	0.606671	-0.589559	0.85838	-0.822359	4796	1100	161	980	187
1	marginicolus	KK259	KK259_G_04	KK259_G_04_RT_02	garden	KK259_04_2_garden	RT	6N	3_apomictic_facultative_sexual	10	2.28858	1	1	1	NA	NA	NA	forest	50.3385	20.1636	294	-0.231194	0.96173	-0.0106818	-0.235643	-0.209862	0.525014	-0.343942	1.16538	0.0345752	-1.104	1.27979	0.536545	-0.928018	-0.000234099	-0.90372	-0.118838	0.477966	-0.627392	2.12675	0.606671	-0.589559	0.85838	-0.822359	4797	759	1000	683	986
1	marginicolus	KK259	KK259_G_04	KK259_G_04_RT_02	garden	KK259_04_2_garden	RT	6N	3_apomictic_facultative_sexual	10	2.28858	1	1	1	NA	NA	NA	forest	50.3385	20.1636	294	-0.231194	0.96173	-0.0106818	-0.235643	-0.209862	0.525014	-0.343942	1.16538	0.0345752	-1.104	1.27979	0.536545	-0.928018	-0.000234099	-0.90372	-0.118838	0.477966	-0.627392	2.12675	0.606671	-0.589559	0.85838	-0.822359	4798	1393	216	1307	161
1	marginicolus	KK259	KK259_G_04	KK259_G_04_SL_01	garden	KK259_04_SL_1_garden	SL	6N	3_apomictic_facultative_sexual	10	2.28858	1	1	1	NA	NA	NA	forest	50.3385	20.1636	294	-0.231194	0.96173	-0.0106818	-0.235643	-0.209862	0.525014	-0.343942	1.16538	0.0345752	-1.104	1.27979	0.536545	-0.928018	-0.000234099	-0.90372	-0.118838	0.477966	-0.627392	2.12675	0.606671	-0.589559	0.85838	-0.822359	8649	229	46	210	49
1	marginicolus	KK259	KK259_G_04	KK259_G_04_SL_02	garden	KK259_04_SL_2_garden	SL	6N	3_apomictic_facultative_sexual	10	2.28858	1	1	1	NA	NA	NA	forest	50.3385	20.1636	294	-0.231194	0.96173	-0.0106818	-0.235643	-0.209862	0.525014	-0.343942	1.16538	0.0345752	-1.104	1.27979	0.536545	-0.928018	-0.000234099	-0.90372	-0.118838	0.477966	-0.627392	2.12675	0.606671	-0.589559	0.85838	-0.822359	8650	179	36	165	33
1	marginicolus	KK259	KK259_G_04	KK259_G_04_SL_03	garden	KK259_04_SL_3_garden	SL	6N	3_apomictic_facultative_sexual	10	2.28858	1	1	1	NA	NA	NA	forest	50.3385	20.1636	294	-0.231194	0.96173	-0.0106818	-0.235643	-0.209862	0.525014	-0.343942	1.16538	0.0345752	-1.104	1.27979	0.536545	-0.928018	-0.000234099	-0.90372	-0.118838	0.477966	-0.627392	2.12675	0.606671	-0.589559	0.85838	-0.822359	8651	150	63	135	57
1	marginicolus	KK259	KK259_G_04	KK259_G_04_SL_04	garden	KK259_04_SL_4_garden	SL	6N	3_apomictic_facultative_sexual	10	2.28858	1	1	1	NA	NA	NA	forest	50.3385	20.1636	294	-0.231194	0.96173	-0.0106818	-0.235643	-0.209862	0.525014	-0.343942	1.16538	0.0345752	-1.104	1.27979	0.536545	-0.928018	-0.000234099	-0.90372	-0.118838	0.477966	-0.627392	2.12675	0.606671	-0.589559	0.85838	-0.822359	8652	132	34	120	29
1	marginicolus	KK259	KK259_G_05	KK259_G_05_BL_01	garden	KK259_05_BL_1_garden	BL	6N	3_apomictic_facultative_sexual	10	2.28858	1	1	1	NA	NA	NA	forest	50.3385	20.1636	294	-0.231194	0.96173	-0.0106818	-0.235643	-0.209862	0.525014	-0.343942	1.16538	0.0345752	-1.104	1.27979	0.536545	-0.928018	-0.000234099	-0.90372	-0.118838	0.477966	-0.627392	2.12675	0.606671	-0.589559	0.85838	-0.822359	364	562	353	514	367
1	marginicolus	KK259	KK259_G_05	KK259_G_05_BL_02	garden	KK259_05_BL_2_garden	BL	6N	3_apomictic_facultative_sexual	10	2.28858	1	1	1	NA	NA	NA	forest	50.3385	20.1636	294	-0.231194	0.96173	-0.0106818	-0.235643	-0.209862	0.525014	-0.343942	1.16538	0.0345752	-1.104	1.27979	0.536545	-0.928018	-0.000234099	-0.90372	-0.118838	0.477966	-0.627392	2.12675	0.606671	-0.589559	0.85838	-0.822359	365	710	468	655	456
1	marginicolus	KK259	KK259_G_05	KK259_G_05_BL_03	garden	KK259_05_BL_3_garden	BL	6N	3_apomictic_facultative_sexual	10	2.28858	1	1	1	NA	NA	NA	forest	50.3385	20.1636	294	-0.231194	0.96173	-0.0106818	-0.235643	-0.209862	0.525014	-0.343942	1.16538	0.0345752	-1.104	1.27979	0.536545	-0.928018	-0.000234099	-0.90372	-0.118838	0.477966	-0.627392	2.12675	0.606671	-0.589559	0.85838	-0.822359	366	558	310	495	348
1	marginicolus	KK259	KK259_G_05	KK259_G_05_RT_01	garden	KK259_05_1_garden	RT	6N	3_apomictic_facultative_sexual	10	2.28858	1	1	1	NA	NA	NA	forest	50.3385	20.1636	294	-0.231194	0.96173	-0.0106818	-0.235643	-0.209862	0.525014	-0.343942	1.16538	0.0345752	-1.104	1.27979	0.536545	-0.928018	-0.000234099	-0.90372	-0.118838	0.477966	-0.627392	2.12675	0.606671	-0.589559	0.85838	-0.822359	4799	835	1035	770	993
1	marginicolus	KK259	KK259_G_05	KK259_G_05_RT_01	garden	KK259_05_1_garden	RT	6N	3_apomictic_facultative_sexual	10	2.28858	1	1	1	NA	NA	NA	forest	50.3385	20.1636	294	-0.231194	0.96173	-0.0106818	-0.235643	-0.209862	0.525014	-0.343942	1.16538	0.0345752	-1.104	1.27979	0.536545	-0.928018	-0.000234099	-0.90372	-0.118838	0.477966	-0.627392	2.12675	0.606671	-0.589559	0.85838	-0.822359	4800	1519	286	1462	213
1	marginicolus	KK259	KK259_G_05	KK259_G_05_RT_02	garden	KK259_05_2_garden	RT	6N	3_apomictic_facultative_sexual	10	2.28858	1	1	1	NA	NA	NA	forest	50.3385	20.1636	294	-0.231194	0.96173	-0.0106818	-0.235643	-0.209862	0.525014	-0.343942	1.16538	0.0345752	-1.104	1.27979	0.536545	-0.928018	-0.000234099	-0.90372	-0.118838	0.477966	-0.627392	2.12675	0.606671	-0.589559	0.85838	-0.822359	4801	586	1033	515	991
1	marginicolus	KK259	KK259_G_05	KK259_G_05_RT_02	garden	KK259_05_2_garden	RT	6N	3_apomictic_facultative_sexual	10	2.28858	1	1	1	NA	NA	NA	forest	50.3385	20.1636	294	-0.231194	0.96173	-0.0106818	-0.235643	-0.209862	0.525014	-0.343942	1.16538	0.0345752	-1.104	1.27979	0.536545	-0.928018	-0.000234099	-0.90372	-0.118838	0.477966	-0.627392	2.12675	0.606671	-0.589559	0.85838	-0.822359	4802	1087	283	952	198
1	marginicolus	KK259	KK259_G_05	KK259_G_05_SL_02	garden	KK259_05_SL_2_garden	SL	6N	3_apomictic_facultative_sexual	10	2.28858	1	1	1	NA	NA	NA	forest	50.3385	20.1636	294	-0.231194	0.96173	-0.0106818	-0.235643	-0.209862	0.525014	-0.343942	1.16538	0.0345752	-1.104	1.27979	0.536545	-0.928018	-0.000234099	-0.90372	-0.118838	0.477966	-0.627392	2.12675	0.606671	-0.589559	0.85838	-0.822359	8653	170	33	164	33
1	marginicolus	KK259	KK259_G_06	KK259_G_06_BL_01	garden	KK259_06_BL_1_garden	BL	6N	3_apomictic_facultative_sexual	10	2.28858	1	1	1	NA	NA	NA	forest	50.3385	20.1636	294	-0.231194	0.96173	-0.0106818	-0.235643	-0.209862	0.525014	-0.343942	1.16538	0.0345752	-1.104	1.27979	0.536545	-0.928018	-0.000234099	-0.90372	-0.118838	0.477966	-0.627392	2.12675	0.606671	-0.589559	0.85838	-0.822359	367	712	383	650	405
1	marginicolus	KK259	KK259_G_06	KK259_G_06_BL_02	garden	KK259_06_BL_2_garden	BL	6N	3_apomictic_facultative_sexual	10	2.28858	1	1	1	NA	NA	NA	forest	50.3385	20.1636	294	-0.231194	0.96173	-0.0106818	-0.235643	-0.209862	0.525014	-0.343942	1.16538	0.0345752	-1.104	1.27979	0.536545	-0.928018	-0.000234099	-0.90372	-0.118838	0.477966	-0.627392	2.12675	0.606671	-0.589559	0.85838	-0.822359	368	615	426	551	446
1	marginicolus	KK259	KK259_G_06	KK259_G_06_RT_01	garden	KK259_06_1_garden	RT	6N	3_apomictic_facultative_sexual	10	2.28858	1	1	1	NA	NA	NA	forest	50.3385	20.1636	294	-0.231194	0.96173	-0.0106818	-0.235643	-0.209862	0.525014	-0.343942	1.16538	0.0345752	-1.104	1.27979	0.536545	-0.928018	-0.000234099	-0.90372	-0.118838	0.477966	-0.627392	2.12675	0.606671	-0.589559	0.85838	-0.822359	4803	590	1160	496	1122
1	marginicolus	KK259	KK259_G_06	KK259_G_06_RT_01	garden	KK259_06_1_garden	RT	6N	3_apomictic_facultative_sexual	10	2.28858	1	1	1	NA	NA	NA	forest	50.3385	20.1636	294	-0.231194	0.96173	-0.0106818	-0.235643	-0.209862	0.525014	-0.343942	1.16538	0.0345752	-1.104	1.27979	0.536545	-0.928018	-0.000234099	-0.90372	-0.118838	0.477966	-0.627392	2.12675	0.606671	-0.589559	0.85838	-0.822359	4804	1092	519	916	447
1	marginicolus	KK259	KK259_G_06	KK259_G_06_RT_02	garden	KK259_06_2_garden	RT	6N	3_apomictic_facultative_sexual	10	2.28858	1	1	1	NA	NA	NA	forest	50.3385	20.1636	294	-0.231194	0.96173	-0.0106818	-0.235643	-0.209862	0.525014	-0.343942	1.16538	0.0345752	-1.104	1.27979	0.536545	-0.928018	-0.000234099	-0.90372	-0.118838	0.477966	-0.627392	2.12675	0.606671	-0.589559	0.85838	-0.822359	4805	913	1163	848	1103
1	marginicolus	KK259	KK259_G_06	KK259_G_06_RT_02	garden	KK259_06_2_garden	RT	6N	3_apomictic_facultative_sexual	10	2.28858	1	1	1	NA	NA	NA	forest	50.3385	20.1636	294	-0.231194	0.96173	-0.0106818	-0.235643	-0.209862	0.525014	-0.343942	1.16538	0.0345752	-1.104	1.27979	0.536545	-0.928018	-0.000234099	-0.90372	-0.118838	0.477966	-0.627392	2.12675	0.606671	-0.589559	0.85838	-0.822359	4806	1670	530	1551	416
1	marginicolus	KK259	KK259_G_06	KK259_G_06_SL_01	garden	KK259_06_SL_1_garden	SL	6N	3_apomictic_facultative_sexual	10	2.28858	1	1	1	NA	NA	NA	forest	50.3385	20.1636	294	-0.231194	0.96173	-0.0106818	-0.235643	-0.209862	0.525014	-0.343942	1.16538	0.0345752	-1.104	1.27979	0.536545	-0.928018	-0.000234099	-0.90372	-0.118838	0.477966	-0.627392	2.12675	0.606671	-0.589559	0.85838	-0.822359	8654	208	52	191	47
1	marginicolus	KK259	KK259_G_06	KK259_G_06_SL_02	garden	KK259_06_SL_2_garden	SL	6N	3_apomictic_facultative_sexual	10	2.28858	1	1	1	NA	NA	NA	forest	50.3385	20.1636	294	-0.231194	0.96173	-0.0106818	-0.235643	-0.209862	0.525014	-0.343942	1.16538	0.0345752	-1.104	1.27979	0.536545	-0.928018	-0.000234099	-0.90372	-0.118838	0.477966	-0.627392	2.12675	0.606671	-0.589559	0.85838	-0.822359	8655	168	37	145	40
1	marginicolus	KK259	KK259_G_06	KK259_G_06_SL_03	garden	KK259_06_SL_3_garden	SL	6N	3_apomictic_facultative_sexual	10	2.28858	1	1	1	NA	NA	NA	forest	50.3385	20.1636	294	-0.231194	0.96173	-0.0106818	-0.235643	-0.209862	0.525014	-0.343942	1.16538	0.0345752	-1.104	1.27979	0.536545	-0.928018	-0.000234099	-0.90372	-0.118838	0.477966	-0.627392	2.12675	0.606671	-0.589559	0.85838	-0.822359	8656	187	35	159	35
1	marginicolus	KK259	KK259_H_01	KK259_H_01_BL_01	herbar	KK259_L01_BL_herbar	BL	6N	3_apomictic_facultative_sexual	10	2.28858	1	1	1	NA	NA	NA	forest	50.3385	20.1636	294	-0.231194	0.96173	-0.0106818	-0.235643	-0.209862	0.525014	-0.343942	1.16538	0.0345752	-1.104	1.27979	0.536545	-0.928018	-0.000234099	-0.90372	-0.118838	0.477966	-0.627392	2.12675	0.606671	-0.589559	0.85838	-0.822359	369	877	636	830	642
1	marginicolus	KK259	KK259_H_01	KK259_H_01_RT_01	herbar	KK259_L01_herbar	RT	6N	3_apomictic_facultative_sexual	10	2.28858	1	1	1	NA	NA	NA	forest	50.3385	20.1636	294	-0.231194	0.96173	-0.0106818	-0.235643	-0.209862	0.525014	-0.343942	1.16538	0.0345752	-1.104	1.27979	0.536545	-0.928018	-0.000234099	-0.90372	-0.118838	0.477966	-0.627392	2.12675	0.606671	-0.589559	0.85838	-0.822359	4807	567	1191	482	1173
1	marginicolus	KK259	KK259_H_01	KK259_H_01_SL_01	herbar	KK259_L01_SL_herbar	SL	6N	3_apomictic_facultative_sexual	10	2.28858	1	1	1	NA	NA	NA	forest	50.3385	20.1636	294	-0.231194	0.96173	-0.0106818	-0.235643	-0.209862	0.525014	-0.343942	1.16538	0.0345752	-1.104	1.27979	0.536545	-0.928018	-0.000234099	-0.90372	-0.118838	0.477966	-0.627392	2.12675	0.606671	-0.589559	0.85838	-0.822359	8657	965	898	957	894
1	marginicolus	KK259	KK259_H_05	KK259_H_05_BL_01	herbar	KK259_L05_BL_herbar	BL	6N	3_apomictic_facultative_sexual	10	2.28858	1	1	1	NA	NA	NA	forest	50.3385	20.1636	294	-0.231194	0.96173	-0.0106818	-0.235643	-0.209862	0.525014	-0.343942	1.16538	0.0345752	-1.104	1.27979	0.536545	-0.928018	-0.000234099	-0.90372	-0.118838	0.477966	-0.627392	2.12675	0.606671	-0.589559	0.85838	-0.822359	370	778	582	740	601
1	marginicolus	KK259	KK259_H_05	KK259_H_05_RT_01	herbar	KK259_L05_herbar	RT	6N	3_apomictic_facultative_sexual	10	2.28858	1	1	1	NA	NA	NA	forest	50.3385	20.1636	294	-0.231194	0.96173	-0.0106818	-0.235643	-0.209862	0.525014	-0.343942	1.16538	0.0345752	-1.104	1.27979	0.536545	-0.928018	-0.000234099	-0.90372	-0.118838	0.477966	-0.627392	2.12675	0.606671	-0.589559	0.85838	-0.822359	4808	498	1224	422	1187
1	marginicolus	KK259	KK259_H_05	KK259_H_05_SL_01	herbar	KK259_L05_SL_herbar	SL	6N	3_apomictic_facultative_sexual	10	2.28858	1	1	1	NA	NA	NA	forest	50.3385	20.1636	294	-0.231194	0.96173	-0.0106818	-0.235643	-0.209862	0.525014	-0.343942	1.16538	0.0345752	-1.104	1.27979	0.536545	-0.928018	-0.000234099	-0.90372	-0.118838	0.477966	-0.627392	2.12675	0.606671	-0.589559	0.85838	-0.822359	8658	1082	931	1074	929
1	marginicolus	KK259	KK259_H_07	KK259_H_07_BL_01	herbar	KK259_L07_BL_herbar	BL	6N	3_apomictic_facultative_sexual	10	2.28858	1	1	1	NA	NA	NA	forest	50.3385	20.1636	294	-0.231194	0.96173	-0.0106818	-0.235643	-0.209862	0.525014	-0.343942	1.16538	0.0345752	-1.104	1.27979	0.536545	-0.928018	-0.000234099	-0.90372	-0.118838	0.477966	-0.627392	2.12675	0.606671	-0.589559	0.85838	-0.822359	371	624	508	579	521
1	marginicolus	KK259	KK259_H_07	KK259_H_07_RT_01	herbar	KK259_L07_herbar	RT	6N	3_apomictic_facultative_sexual	10	2.28858	1	1	1	NA	NA	NA	forest	50.3385	20.1636	294	-0.231194	0.96173	-0.0106818	-0.235643	-0.209862	0.525014	-0.343942	1.16538	0.0345752	-1.104	1.27979	0.536545	-0.928018	-0.000234099	-0.90372	-0.118838	0.477966	-0.627392	2.12675	0.606671	-0.589559	0.85838	-0.822359	4809	577	1280	511	1268
1	marginicolus	KK259	KK259_H_07	KK259_H_07_SL_01	herbar	KK259_L07_SL_herbar	SL	6N	3_apomictic_facultative_sexual	10	2.28858	1	1	1	NA	NA	NA	forest	50.3385	20.1636	294	-0.231194	0.96173	-0.0106818	-0.235643	-0.209862	0.525014	-0.343942	1.16538	0.0345752	-1.104	1.27979	0.536545	-0.928018	-0.000234099	-0.90372	-0.118838	0.477966	-0.627392	2.12675	0.606671	-0.589559	0.85838	-0.822359	8659	947	799	934	812
1	mendax	10476	10476_G_01	10476_G_01_BL_01	garden	10476_1_BL_1_garden	BL	4N	2_apomictic_obligate_asexual	4	1.55928	1	1	1	NA	NA	NA	forest	60.2171	23.8794	48	1.61834	1.56921	-0.670902	-1.22127	-1.4429	-0.770562	-1.60239	1.63724	-0.684628	-1.67168	1.31999	-0.221065	-0.953739	-0.646581	-1.6283	-0.531806	-0.494302	-0.769518	0.821935	-0.425904	-0.792023	-0.520192	-0.534533	170	446	232	416	253
1	mendax	10476	10476_G_01	10476_G_01_BL_02	garden	10476_1_BL_2_garden	BL	4N	2_apomictic_obligate_asexual	4	1.55928	1	1	1	NA	NA	NA	forest	60.2171	23.8794	48	1.61834	1.56921	-0.670902	-1.22127	-1.4429	-0.770562	-1.60239	1.63724	-0.684628	-1.67168	1.31999	-0.221065	-0.953739	-0.646581	-1.6283	-0.531806	-0.494302	-0.769518	0.821935	-0.425904	-0.792023	-0.520192	-0.534533	171	436	262	407	275
1	mendax	10476	10476_G_01	10476_G_01_BL_03	garden	10476_1_BL_3_garden	BL	4N	2_apomictic_obligate_asexual	4	1.55928	1	1	1	NA	NA	NA	forest	60.2171	23.8794	48	1.61834	1.56921	-0.670902	-1.22127	-1.4429	-0.770562	-1.60239	1.63724	-0.684628	-1.67168	1.31999	-0.221065	-0.953739	-0.646581	-1.6283	-0.531806	-0.494302	-0.769518	0.821935	-0.425904	-0.792023	-0.520192	-0.534533	172	398	269	377	290
[truncated: 10,662 more rows]
[truncated: 52 more columns]
