# Supplementary material for: Geometric Morphometric Versus Genomic Patterns in a Large Polyploid Plant Species Complex
Source: MDPI journal article supplement (doi:10.3390/biology12030418), 2023-03-09
Supplement: s1 [file s1 › Table_S2_Discriminant_analysis_RADSeq_TEG_CP.xlsx]

## Sheet: Sheet1
				BASAL LEAVES				STEM LEAVES				RECEPTACLES				CONCATENATED		BASAL LEAVES_AVE		STEM LEAVES_AVE		RECEPTACLES_AVE		CC_AVERAGE
	NGS clustering	block 1	block 2	BL_PD	BL_PD_P	BL_MD	BL_MD_P	SL_PD	SL_PD_P	SL_MD	SL_MD_P	RT_PD	RT_PD_P	RT_MD	RT_MD_P	CC_F	CC_F_P	BL_PD	BL_MD	SL_PD	SL_MD	RT_PD	RT_MD	CC_F
	RADSeq_sNMF	Cluster_1_(cas+apo)	Cluster_2_(not+mar+fla+apo)	0.212	0.0001	3.1495	0.0001	0.1418	0.0001	5.665	0.0001	0.0796	0.002	2.1246	0.0001	15.04	0.0003	0.1821	3.80637	0.115833	4.5993	0.0584	1.98393	13.6853
	RADSeq_sNMF	Cluster_1_(cas+apo)	Cluster_3_(env+apo)	0.2609	0.0001	4.2137	0.0001	0.1194	0.0001	5.8146	0.0001	0.0294	0.3748	2.0683	0.0002	20.78	0.0003
	RADSeq_sNMF	Cluster_2_(not+mar+fla+apo)	Cluster_3_(env+apo)	0.0734	0.0268	4.0559	0.0001	0.0863	0.0004	2.3183	0.0001	0.0662	0.0029	1.7589	0.0001	5.236	0.0006
	RADSeq_NeighborNet	Cluster_1_(cas+apo)	Cluster_2_(not+mar+fla+apo)	0.2095	0.0001	3.4681	0.0001	0.1394	0.0001	5.4652	0.0001	0.0587	0.0372	1.6791	0.0125	14.02	0.0003	0.185667	4.3471	0.115333	4.51593	0.0467667	2.02927	12.6967
	RADSeq_NeighborNet	Cluster_1_(cas+apo)	Cluster_3_(env+apo)	0.2666	0.0001	5.3176	0.0001	0.1227	0.0001	5.807	0.0001	0.0303	0.4	2.723	0.0001	19.32	0.0003
	RADSeq_NeighborNet	Cluster_2_(not+mar+fla+apo)	Cluster_3_(env+apo)	0.0809	0.0154	4.2556	0.0001	0.0839	0.0017	2.2756	0.0001	0.0513	0.0347	1.6857	0.0002	4.75	0.0006
	RADSeq_RADpainter_3G	Cluster_1_(cas+apo)	Cluster_2_(not+mar+fla+apo)	0.2253	0.0001	3.3105	0.0001	0.1538	0.0001	6.0033	0.0001	0.071	0.0067	1.7815	0.0015	19.05	0.0003	0.188333	4.16973	0.1226	4.71307	0.0532333	2.00967	15.1763
	RADSeq_RADpainter_3G	Cluster_1_(cas+apo)	Cluster_3_(env+apo)	0.2671	0.0001	4.7106	0.0001	0.1185	0.0001	5.6756	0.0001	0.0298	0.3716	2.4773	0.0001	21.01	0.0003
	RADSeq_RADpainter_3G	Cluster_2_(not+mar+fla+apo)	Cluster_3_(env+apo)	0.0726	0.0248	4.4881	0.0001	0.0955	0.0004	2.4603	0.0001	0.0589	0.013	1.7702	0.0004	5.469	0.0003
	TEG_Stacey	Cluster_1_(cas+apo)	Cluster_2_(fla+apo)	0.0612	0.7907	3.0555	0.363	0.0926	0.1621	6.9688	0.0001	0.1525	0.0093	5.1062	0.0001	1.752	1	0.17562	4.72814	0.10515	5.78521	0.11621	4.97408	8.2903
	TEG_Stacey	Cluster_1_(cas+apo)	Cluster_3_(mar+apo)	0.2202	0.0587	6.5322	0.0034	0.1181	0.0869	6.4769	0.0043	0.1822	0.0023	7.0751	0.0042	3.621	0.345
	TEG_Stacey	Cluster_1_(cas+apo)	Cluster_4_(not+apo)	0.2755	0.0001	5.1312	0.0001	0.1923	0.0001	6.5578	0.0001	0.0789	0.0026	1.9866	0.0025	27.28	0.001
	TEG_Stacey	Cluster_1_(cas+apo)	Cluster_5_(env+apo)	0.2641	0.0001	4.3435	0.0001	0.1149	0.0001	4.9762	0.0001	0.0347	0.2056	2.2682	0.0001	23.93	0.001
	TEG_Stacey	Cluster_2_(fla+apo)	Cluster_3_(mar+apo)	0.2022	0.2392	5.954	0.0001	0.044	0.9307	6.8548	0.0993	0.1532	0.2351	8.179	0.0001	1.327	1
	TEG_Stacey	Cluster_2_(fla+apo)	Cluster_4_(not+apo)	0.2436	0.0033	4.4591	0.0048	0.1091	0.0145	4.7811	0.0051	0.0994	0.0548	5.2053	0.0002	6.58	0.043
	TEG_Stacey	Cluster_2_(fla+apo)	Cluster_5_(env+apo)	0.2349	0.0019	4.1655	0.0015	0.094	0.105	5.3395	0.0004	0.1258	0.019	4.33	0.002	6.179	0.036
	TEG_Stacey	Cluster_3_(mar+apo)	Cluster_4_(not+apo)	0.1092	0.1784	5.2637	0.0084	0.0786	0.0701	6.6654	0.0041	0.1154	0.0263	6.7755	0.0019	2.284	0.454
	TEG_Stacey	Cluster_3_(mar+apo)	Cluster_5_(env+apo)	0.0958	0.2877	4.8738	0.0058	0.0826	0.1974	6.0373	0.0021	0.1639	0.0066	6.806	0.0018	2.574	0.285
	TEG_Stacey	Cluster_4_(not+apo)	Cluster_5_(env+apo)	0.0495	0.1396	3.5029	0.0001	0.1253	0.0001	3.1943	0.0001	0.0561	0.0144	2.0089	0.0001	7.376	0.001
	Plastid_ML_tree	Cluster_1_(cas+fla+apo)	Cluster_2_(apo)	0.27	0.0001	4.8609	0.0001	0.1114	0.0001	4.4174	0.0001	0.0261	0.5525	2.5426	0.0001	22.11	0.0006	0.172783	4.37955	0.108567	4.38645	0.0619	2.62408	10.872
	Plastid_ML_tree	Cluster_1_(cas+fla+apo)	Cluster_3_(env+apo)	0.3057	0.0047	5.653	0.0004	0.1212	0.0229	5.9146	0.0002	0.0917	0.1997	3.2507	0.1112	5.983	0.0144
	Plastid_ML_tree	Cluster_1_(cas+fla+apo)	Cluster_4_(not+mar+apo)	0.2655	0.0001	5.4379	0.0001	0.1749	0.0001	5.3903	0.0001	0.0571	0.0444	1.8157	0.0029	27.19	0.0006
	Plastid_ML_tree	Cluster_2_(apo)	Cluster_3_(env+apo)	0.0703	0.4434	3.6416	0.0869	0.0455	0.4809	3.731	0.0576	0.0944	0.0295	3.6481	0.0015	1.395	1
	Plastid_ML_tree	Cluster_2_(apo)	Cluster_4_(not+mar+apo)	0.0522	0.09	4.1214	0.0001	0.1187	0.0001	2.6872	0.0001	0.0555	0.0134	1.9671	0.0001	7.299	0.0006
	Plastid_ML_tree	Cluster_3_(env+apo)	Cluster_4_(not+mar+apo)	0.073	0.4019	2.5625	0.8423	0.0797	0.046	4.1782	0.0127	0.0466	0.6373	2.5203	0.4574	1.255	1
	BL = basal leaf
	SL = stem leaf
	RT = receptacle
	PD = Procrustes distance
	MD = Mahalanobis distance
	PDP = Procrustes distance P-value
	MDP = Mahalanobis distance P-value
	CC = concatenated datasets
	F = F-value (NPMANOVA)
	F_P = Bonferroni corrected P-value
