# Supplementary material for: Geometric Morphometric Versus Genomic Patterns in a Large Polyploid Plant Species Complex
Source: MDPI journal article supplement (doi:10.3390/biology12030418), 2023-03-09
Supplement: s1 [file s1 › Table_S3_Discriminant_analysis_RADSeq.xlsx]

## Sheet: Sheet1
			cluster 1 -- cluster 2				cluster 1 -- cluster 3				cluster 2 -- cluster 3				overall
			BL	SL	RT	CC	BL	SL	RT	CC	BL	SL	RT	CC	CC
	shapes averaged over populations	Procrustes distance between means	0.185352	0.139422	0.0596269	-	0.220371	0.0959704	0.0350132	-	0.0631858	0.0942833	0.0596456	-	-
		Procrustes distance P-value	0.0001	0.0001	0.0001	-	0.0001	0.0001	0.0048	-	0.0001	0.0001	0.0001	-	-
		Mahalanobis distance between means	2.7312	4.4834	1.3016	-	4.3362	4.7129	2.4774	-	2.7383	1.6652	1.4858	-	-
		Mahalanobis distance P-value	0.0001	0.0001	0.0038	-	0.0001	0.0001	0.0001	-	0.0001	0.0001	0.0001	-	-
		Permutation MANOVA pairwise F	-	-	-	34,21***	-	-	-	43,79***	-	-	-	21,39***	31,68***
		discriminant function mean classification accuracy (%) (apo+sex)	92.6984	98.0159	74.9206	100	98.0451	98.0451	91.8797	100	92.9825	79.4737	80.3509	97	96
		cross-validation mean classification accuracy (%) 'JCA' (apo+sex)	85.6349	90.9524	68.4127	90.4	91.2782	93.7594	87.8195	96	87.4854	71.3743	76.5205	87	85
		cross-validation mean classification accuracy (%) 'JCA' (apo only)	85				91				88
	no averaging	cross-validation mean classification accuracy (%) 'JCA' (apo+sex)	82				86				77
		cross-validation mean classification accuracy (%) 'JCA' (apo only)	80				85				79
		Abbreviations
		BL = basal leaf
		SL = stem leaf
		RT = receptacle
		CC = concatenated dataset
		F = F-value (NPMANOVA)
		*** = Bonferroni corrected P-value < 0.001
		apo = apomictic polyploid populations
		sex = sexual populations
