# Supplementary material for: Geometric Morphometric Versus Genomic Patterns in a Large Polyploid Plant Species Complex
Source: MDPI journal article supplement (doi:10.3390/biology12030418), 2023-03-09
Supplement: s1 [file s1 › Table_S4_Discriminant_analysis_BL_Nothotaxa.xlsx]

## Sheet: Sheet2
	CLUSTER_1	DISTANCES	BL MD\PD	cassubicifolius	elatior	mendax	platycolpoides	SL MD\PD	cassubicifolius	elatior	mendax	platycolpoides	RT MD\PD	cassubicifolius	elatior	mendax	platycolpoides
	CLUSTER_1	DISTANCES	cassubicifolius	n	0.1308	0.3277	0.2995	cassubicifolius	n	0.0652	0.1206	0.1501	cassubicifolius	n	0.1263	0.1217	0.088
	CLUSTER_1	DISTANCES	elatior	11.8484	n	0.4198	0.386	elatior	9.2983	n	0.1227	0.1498	elatior	15.0769	n	0.042	0.0554
	CLUSTER_1	DISTANCES	mendax	13.6498	18.9825	n	0.105	mendax	9.7671	9.435	n	0.0444	mendax	17.191	5.8459	n	0.0524
	CLUSTER_1	DISTANCES	platycolpoides	9.0174	16.8879	8.9358	n	platycolpoides	11.178	10.7479	3.9338	n	platycolpoides	12.5922	7.5458	8.8925	n
	CLUSTER_1	P_VALUES	BL MDP\PDP	cassubicifolius	elatior	mendax	platycolpoides	SL MDP\PDP	cassubicifolius	elatior	mendax	platycolpoides	RT MDP\PDP	cassubicifolius	elatior	mendax	platycolpoides
	CLUSTER_1	P_VALUES	cassubicifolius	n	0.259	0.0171	0.0041	cassubicifolius	n	0.4679	0.0076	0.0001	cassubicifolius	n	0.1065	0.0718	0.0646
	CLUSTER_1	P_VALUES	elatior	0.0001	n	0.029	0.0085	elatior	0.0059	n	0.0232	0.0024	elatior	0.0125	n	0.4913	0.3471
	CLUSTER_1	P_VALUES	mendax	0.0084	0.0106	n	0.001	mendax	0.0063	0.02	n	0.1128	mendax	0.0066	0.0197	n	0.2498
	CLUSTER_1	P_VALUES	platycolpoides	0.0013	0.0072	0.0005	n	platycolpoides	0.0012	0.0096	0.003	n	platycolpoides	0.0001	0.0047	0.0012	n
	CLUSTER_2	DISTANCES	BL MD\PD	binatus	cosmophyllus	fissifolius	latifolius	notabilis	obscurans	obtusulus	phragmiteti	variabilis	SL MD\PD	binatus	cosmophyllus	fissifolius	latifolius	notabilis	obscurans	obtusulus	phragmiteti	variabilis	RT MD\PD	binatus	cosmophyllus	fissifolius	latifolius	notabilis	obscurans	obtusulus	phragmiteti	variabilis
	CLUSTER_2	DISTANCES	binatus	n	0.1485	0.1243	0.0758	0.0836	0.1507	0.0883	0.1101	0.1163	binatus	n	0.1095	0.0155	0.044	0.0755	0.1194	0.1028	0.0978	0.0719	binatus	n	0.111	0.0518	0.0912	0.1487	0.1085	0.0801	0.1276	0.1386
	CLUSTER_2	DISTANCES	cosmophyllus	6.0323	n	0.0701	0.1359	0.1491	0.0526	0.0799	0.0911	0.1437	cosmophyllus	5.419	n	0.1028	0.0752	0.0722	0.012	0.0335	0.0179	0.0511	cosmophyllus	7.4665	n	0.0743	0.0524	0.123	0.0243	0.0419	0.0782	0.0829
	CLUSTER_2	DISTANCES	fissifolius	6.9606	6.1116	n	0.1197	0.1124	0.07	0.0962	0.0749	0.114	fissifolius	4.9879	6.6526	n	0.0387	0.0704	0.1126	0.0968	0.0915	0.0647	fissifolius	3.5588	5.066	n	0.0479	0.1332	0.0759	0.0458	0.0888	0.1051
	CLUSTER_2	DISTANCES	latifolius	4.6017	5.0725	4.9494	n	0.078	0.1559	0.0767	0.1215	0.1518	latifolius	4.9044	6.3021	4.6863	n	0.0454	0.0844	0.0631	0.0612	0.0406	latifolius	4.7455	4.8742	2.2139	n	0.103	0.0635	0.0454	0.0475	0.0668
	CLUSTER_2	DISTANCES	notabilis	7.5202	6.6026	6.5655	6.5741	n	0.1518	0.108	0.1351	0.117	notabilis	6.7217	8.7536	5.9557	6.1608	n	0.0779	0.0593	0.057	0.0339	notabilis	5.7016	10.3352	7.2755	8.029	n	0.1356	0.1318	0.0827	0.0719
	CLUSTER_2	DISTANCES	obscurans	8.4947	4.4098	7.8229	7.2312	5.9131	n	0.1001	0.0777	0.1167	obscurans	5.6383	2.7782	7.3322	6.7171	8.8269	n	0.0395	0.0264	0.0586	obscurans	7.0283	2.6092	4.6153	4.3164	9.4765	n	0.0397	0.0955	0.0991
	CLUSTER_2	DISTANCES	obtusulus	6.4555	3.5724	7.6005	5.4053	5.7112	4.1172	n	0.0867	0.1283	obtusulus	4.9605	4.3563	4.7215	4.5139	6.9019	5.3506	n	0.0227	0.049	obtusulus	6.1152	2.8944	4.1705	4.0991	8.7662	2.0603	n	0.0853	0.0964
	CLUSTER_2	DISTANCES	phragmiteti	7.3006	5.728	4.744	4.9236	7.5473	6.6305	6.5491	n	0.111	phragmiteti	6.5696	5.1981	7.0033	6.2732	9.5497	4.9692	4.8007	n	0.0384	phragmiteti	3.7991	6.1401	2.6032	3.1474	7.2317	5.8323	5.051	n	0.0375
	CLUSTER_2	DISTANCES	variabilis	7.7064	6.2997	4.3386	5.771	7.1041	7.5637	7.6008	5.3768	n	variabilis	5.2044	5.7043	5.0055	5.9267	6.8957	5.4995	5.0504	5.6809	n	variabilis	5.0072	6.3138	4.7806	5.1805	7.7464	6.317	5.106	3.5584	n
	CLUSTER_2	P_VALUES	BL MDP\PDP	binatus	cosmophyllus	fissifolius	latifolius	notabilis	obscurans	obtusulus	phragmiteti	variabilis	SL MDP\PDP	binatus	cosmophyllus	fissifolius	latifolius	notabilis	obscurans	obtusulus	phragmiteti	variabilis	RT MDP\PDP	binatus	cosmophyllus	fissifolius	latifolius	notabilis	obscurans	obtusulus	phragmiteti	variabilis
	CLUSTER_2	P_VALUES	binatus	n	0.0261	0.0088	0.1801	0.2391	0.0038	0.0705	0.0655	0.0642	binatus	n	0.0119	0.926	0.4376	0.0651	0.0016	0.0014	0.0221	0.2348	binatus	n	0.0543	0.5324	0.0774	0.0068	0.0085	0.1076	0.02	0.0109
	CLUSTER_2	P_VALUES	cosmophyllus	0.0243	n	0.1533	0.0001	0.0059	0.2062	0.0747	0.0732	0.0144	cosmophyllus	0.0051	n	0.0054	0.0542	0.039	0.4142	0.0432	0.5494	0.4135	cosmophyllus	0.0251	n	0.1612	0.2906	0.0218	0.7258	0.3766	0.0595	0.0378
	CLUSTER_2	P_VALUES	fissifolius	0.0014	0.0013	n	0.0025	0.0014	0.0399	0.009	0.1268	0.0197	fissifolius	0.0012	0.0008	n	0.3268	0.0165	0.0011	0.0025	0.0067	0.134	fissifolius	0.0062	0.0013	n	0.3976	0.0012	0.0511	0.4079	0.0573	0.0288
	CLUSTER_2	P_VALUES	latifolius	0.02	0.0012	0.0001	n	0.1612	0.0001	0.105	0.0101	0.0094	latifolius	0.0019	0.0034	0.0001	n	0.2586	0.004	0.0453	0.1195	0.5174	latifolius	0.0044	0.0005	0.2501	n	0.0168	0.049	0.2952	0.2885	0.1278
	CLUSTER_2	P_VALUES	notabilis	0.0006	0.0011	0.0001	0.0001	n	0.001	0.0084	0.0092	0.0478	notabilis	0.0001	0.0001	0.0001	0.0001	n	0.0018	0.032	0.0846	0.5471	notabilis	0.0008	0.0007	0.0001	0.0001	n	0.0016	0.0013	0.1032	0.2058
	CLUSTER_2	P_VALUES	obscurans	0.0024	0.0079	0.0001	0.0004	0.0001	n	0.0116	0.0368	0.0018	obscurans	0.0011	0.273	0.0001	0.0008	0.0001	n	0.0003	0.073	0.1902	obscurans	0.0028	0.1538	0.0001	0.0004	0.0001	n	0.2846	0.0088	0.0035
	CLUSTER_2	P_VALUES	obtusulus	0.0006	0.066	0.0002	0.0002	0.0001	0.0038	n	0.0772	0.025	obtusulus	0.0031	0.0113	0.0002	0.0035	0.0001	0.0009	n	0.3636	0.3022	obtusulus	0.0021	0.0638	0.0001	0.0003	0.0001	0.4999	n	0.0221	0.0092
	CLUSTER_2	P_VALUES	phragmiteti	0.0074	0.0016	0.0002	0.0001	0.0003	0.0007	0.0006	n	0.095	phragmiteti	0.0048	0.0103	0.0002	0.0012	0.0001	0.0002	0.0033	n	0.5113	phragmiteti	0.0087	0.0013	0.0678	0.0063	0.0001	0.001	0.0034	n	0.6052
	CLUSTER_2	P_VALUES	variabilis	0.0078	0.0059	0.0015	0.002	0.0001	0.0002	0.0004	0.0064	n	variabilis	0.0077	0.0153	0.0001	0.0005	0.0001	0.0022	0.0001	0.0001	n	variabilis	0.0033	0.0069	0.0006	0.0014	0.0002	0.0012	0.0019	0.0016	n
	CLUSTER_3	DISTANCES	BL MD\PD	alsaticus	argoviensis	biformis	leptomeris	lucorum	pseudopimus	pseudovertumnalis	reniger	stricticaulis	subglechomoides	vertumnalis	SL MD\PD	alsaticus	argoviensis	biformis	leptomeris	lucorum	pseudopimus	pseudovertumnalis	reniger	stricticaulis	subglechomoides	vertumnalis	RT MD\PD	alsaticus	argoviensis	biformis	leptomeris	lucorum	pseudopimus	pseudovertumnalis	reniger	stricticaulis	subglechomoides	vertumnalis
	CLUSTER_3	DISTANCES	alsaticus	n	0.1112	0.1048	0.0978	0.1736	0.0331	0.0606	0.0671	0.071	0.1317	0.0568	alsaticus	n	0.0635	0.0204	0.0616	0.084	0.0478	0.0421	0.0745	0.0585	0.032	0.0401	alsaticus	n	0.0336	0.0603	0.04	0.0192	0.0328	0.0578	0.1087	0.0147	0.0736	0.0253
	CLUSTER_3	DISTANCES	argoviensis	5.9644	n	0.2045	0.0456	0.2284	0.083	0.1046	0.1341	0.1422	0.2222	0.0672	argoviensis	3.4218	n	0.0808	0.0112	0.114	0.0407	0.0931	0.1063	0.1017	0.0881	0.0342	argoviensis	1.554	n	0.0593	0.0313	0.0395	0.0345	0.065	0.0936	0.0345	0.0979	0.0542
	CLUSTER_3	DISTANCES	biformis	6.231	9.3202	n	0.1938	0.1607	0.1338	0.1388	0.1033	0.0915	0.0485	0.1511	biformis	4.6552	5.5804	n	0.0784	0.0877	0.0616	0.0424	0.0787	0.0579	0.0266	0.0544	biformis	2.6485	3.1705	n	0.0799	0.0731	0.0802	0.1126	0.072	0.0535	0.0725	0.0769
	CLUSTER_3	DISTANCES	leptomeris	5.512	3.4911	9.118	n	0.2051	0.0748	0.0757	0.1168	0.1277	0.2103	0.0521	leptomeris	3.6313	3.5708	5.8707	n	0.1172	0.035	0.0933	0.109	0.1031	0.0877	0.0292	leptomeris	4.264	3.9531	5.2151	n	0.0398	0.0425	0.0512	0.1189	0.0433	0.1074	0.0526
	CLUSTER_3	DISTANCES	lucorum	5.586	6.9849	7.3879	6.8992	n	0.1931	0.1544	0.1206	0.1183	0.1393	0.1844	lucorum	4.2068	4.342	5.4896	3.6466	n	0.1157	0.0511	0.0184	0.0345	0.0669	0.1117	lucorum	1.3633	1.7172	2.4448	3.9574	n	0.0254	0.0425	0.1218	0.0253	0.0809	0.0229
	CLUSTER_3	DISTANCES	pseudopimus	1.8935	5.0207	6.8366	4.9321	5.7205	n	0.0601	0.0829	0.0895	0.1597	0.0357	pseudopimus	3.5228	4.0317	4.976	3.2814	3.4257	n	0.0808	0.1083	0.097	0.0734	0.0175	pseudopimus	1.9855	2.1266	3.506	4.6911	2.0827	n	0.043	0.1156	0.0382	0.0959	0.0422
	CLUSTER_3	DISTANCES	pseudovertumnalis	4.7703	6.2715	8.5256	6.1567	5.6675	3.7221	n	0.0631	0.0741	0.1546	0.0474	pseudovertumnalis	4.334	5.2782	6.3692	5.2316	5.7237	4.9196	n	0.0454	0.029	0.027	0.0773	pseudovertumnalis	3.0919	2.6727	4.7049	3.6391	2.8675	2.5422	n	0.1551	0.0641	0.117	0.0528
	CLUSTER_3	DISTANCES	reniger	6.0698	9.4349	7.1454	9.5206	7.4125	6.6915	8.4973	n	0.0391	0.1103	0.0785	reniger	6.2716	6.5231	7.4901	6.1394	7.175	6.2786	7.0855	n	0.0286	0.0596	0.1033	reniger	5.2518	5.1622	5.9549	6.5152	5.5264	5.8909	6.8817	n	0.1057	0.1241	0.128
	CLUSTER_3	DISTANCES	stricticaulis	4.0812	6.4796	5.3863	6.205	4.5025	3.9191	5.0157	6.3674	n	0.1002	0.0895	stricticaulis	4.6476	5.1936	5.2524	4.6769	3.9837	4.8786	6.3937	8.4727	n	0.0372	0.0914	stricticaulis	1.7137	1.7977	2.6393	4.6404	1.843	2.0226	3.2326	5.7112	n	0.0691	0.029
	CLUSTER_3	DISTANCES	subglechomoides	4.6894	8.1542	4.7947	8.1021	5.9305	4.8331	5.8114	7.1479	4.3794	n	0.1714	subglechomoides	4.4569	5.3803	6.1965	6.1489	6.0136	5.5353	5.3618	8.8057	5.7726	n	0.068	subglechomoides	2.8663	3.5351	3.7453	4.868	3.3476	3.6308	4.6637	5.7876	3.4225	n	0.0684
	CLUSTER_3	DISTANCES	vertumnalis	2.9712	4.7071	6.7064	4.4371	5.5095	2.241	3.7127	6.6471	3.5724	5.4856	n	vertumnalis	2.5609	2.8291	3.923	3.0526	3.9511	2.7284	4.6701	6.2181	4.2941	5.2112	n	vertumnalis	1.9321	1.9933	3.501	3.8767	1.8047	2.5992	2.8291	5.2569	2.0987	3.4763	n
	CLUSTER_3	P_VALUES	BL MDP\PDP	alsaticus	argoviensis	biformis	leptomeris	lucorum	pseudopimus	pseudovertumnalis	reniger	stricticaulis	subglechomoides	vertumnalis	SL MDP\PDP	alsaticus	argoviensis	biformis	leptomeris	lucorum	pseudopimus	pseudovertumnalis	reniger	stricticaulis	subglechomoides	vertumnalis	RT MDP\PDP	alsaticus	argoviensis	biformis	leptomeris	lucorum	pseudopimus	pseudovertumnalis	reniger	stricticaulis	subglechomoides	vertumnalis
	CLUSTER_3	P_VALUES	alsaticus	n	0.0005	0.0115	0.151	0.0001	0.7152	0.441	0.3893	0.2665	0.0108	0.1314	alsaticus	n	0.1356	0.7948	0.17	0.0032	0.1431	0.3056	0.0692	0.1019	0.5028	0.1954	alsaticus	n	0.4969	0.1156	0.7395	0.821	0.3986	0.1801	0.0037	0.988	0.0331	0.7026
	CLUSTER_3	P_VALUES	argoviensis	0.0001	n	0.0035	0.8904	0.0001	0.0206	0.0337	0.0008	0.0003	0.001	0.1406	argoviensis	0.0003	n	0.3061	0.9653	0.0444	0.5365	0.3097	0.2232	0.1867	0.2821	0.5906	argoviensis	0.8947	n	0.2399	0.9579	0.2533	0.5742	0.2166	0.0933	0.7606	0.0114	0.2811
	CLUSTER_3	P_VALUES	biformis	0.0005	0.0043	n	0.0641	0.0011	0.0015	0.016	0.0178	0.2019	0.5914	0.0011	biformis	0.0005	0.0001	n	0.3163	0.0471	0.2455	0.6265	0.1733	0.2845	0.8341	0.3058	biformis	0.1731	0.0824	n	0.2311	0.0059	0.0107	0.0114	0.1137	0.2056	0.1439	0.1139
	CLUSTER_3	P_VALUES	leptomeris	0.0066	0.8535	0.0641	n	0.0128	0.1288	0.2989	0.1015	0.2378	0.1289	0.7039	leptomeris	0.6434	0.9087	0.0672	n	0.0026	0.7231	0.0972	0.0353	0.1389	0.2865	0.8981	leptomeris	0.0119	0.0678	0.0509	n	0.3446	0.6602	0.4006	0.102	0.6561	0.1349	0.7083
	CLUSTER_3	P_VALUES	lucorum	0.0001	0.0001	0.0014	0.0139	n	0.0001	0.0043	0.0239	0.0362	0.0015	0.0001	lucorum	0.0001	0.0004	0.0022	0.7308	n	0.0099	0.2296	0.9057	0.4874	0.1763	0.0046	lucorum	0.8949	0.6862	0.2065	0.0197	n	0.5466	0.1008	0.0052	0.6364	0.006	0.8102
	CLUSTER_3	P_VALUES	pseudopimus	0.9516	0.0006	0.0001	0.0279	0.0002	n	0.2245	0.0701	0.0862	0.0026	0.6228	pseudopimus	0.0006	0.0036	0.0016	0.8159	0.0061	n	0.1289	0.0679	0.0547	0.216	0.873	pseudopimus	0.2561	0.3641	0.001	0.001	0.1481	n	0.4215	0.0025	0.4201	0.019	0.3851
	CLUSTER_3	P_VALUES	pseudovertumnalis	0.0006	0.0104	0.0152	0.0676	0.0065	0.114	n	0.4003	0.6062	0.0497	0.6786	pseudovertumnalis	0.0028	0.0008	0.0181	0.1026	0.003	0.0002	n	0.3663	0.885	0.9857	0.1614	pseudovertumnalis	0.0985	0.5156	0.0261	0.2021	0.1288	0.4211	n	0.1033	0.1741	0.0485	0.4809
	CLUSTER_3	P_VALUES	reniger	0.0011	0.0046	0.0263	0.03	0.0025	0.0001	0.0001	n	0.9424	0.2534	0.2335	reniger	0.0013	0.0026	0.0222	0.0001	0.0021	0.0006	0.0326	n	0.9246	0.4457	0.055	reniger	0.0014	0.0104	0.0235	0.102	0.0054	0.0076	0.1033	n	0.0212	0.0263	0.0127
	CLUSTER_3	P_VALUES	stricticaulis	0.0011	0.0016	0.0251	0.0654	0.0098	0.0032	0.0684	0.0109	n	0.3644	0.1269	stricticaulis	0.0019	0.0031	0.0115	0.2395	0.0212	0.0012	0.0001	0.0001	n	0.7129	0.0657	stricticaulis	0.9398	0.9503	0.7057	0.0397	0.738	0.7719	0.3686	0.0276	n	0.1364	0.841
	CLUSTER_3	P_VALUES	subglechomoides	0.002	0.0009	0.0243	0.038	0.0007	0.0068	0.0426	0.0167	0.1297	n	0.0011	subglechomoides	0.0001	0.0102	0.0054	0.0658	0.0022	0.0021	0.0342	0.0131	0.0132	n	0.223	subglechomoides	0.0825	0.0437	0.042	0.1294	0.0192	0.0232	0.0384	0.0263	0.2813	n	0.1876
	CLUSTER_3	P_VALUES	vertumnalis	0.0002	0.0001	0.0001	0.0582	0.0001	0.7705	0.0649	0.0008	0.0301	0.0006	n	vertumnalis	0.0254	0.3271	0.0088	0.9699	0.0001	0.1489	0.0046	0.0017	0.0028	0.001	n	vertumnalis	0.2989	0.7661	0.0088	0.2608	0.6956	0.0451	0.5907	0.0048	0.9283	0.0343	n
	BL = basal leaf
	SL = stem leaf
	RT = receptacle
	PD = Procrustes distance
	MD = Mahalanobis distance
	PDP = Procrustes distance P-value
	MDP = Mahalanobis distance P-value
