# Supplementary material for: Geometric Morphometric Versus Genomic Patterns in a Large Polyploid Plant Species Complex
Source: MDPI journal article supplement (doi:10.3390/biology12030418), 2023-03-09
Supplement: s1 [file s1 › Table_S5_Regression_models_RADSeq_Subgenomes.xlsx]

## Sheet: Tabelle2
	genomic cluster	statistics	BL	SL	RT
	1 (C)	d2 model fit	0.613933	0.190146	0.009487
		explained %	14	9	1
		Goodall's F	32.497	18.34	1.2111
		p-value	0	0	0.192
	2 (N)	d2 model fit	0.303265	0.419083	0.102226
		explained %	7	19	7
		Goodall's F	14.7817	45.7701	13.9187
		p-value	0	0	0
	3 (E)	d2 model fit	0.433775	0.095018	0.049005
		explained %	10	4	3
		Goodall's F	21.8617	8.7435	6.4272
		p-value	0	0	0
