# Supplementary material for: Geometric Morphometric Versus Genomic Patterns in a Large Polyploid Plant Species Complex
Source: MDPI journal article supplement (doi:10.3390/biology12030418), 2023-03-09
Supplement: s1 [file s1 › Table_S6_Regression_models_Shape_Genomics_Environment.xlsx]

## Sheet: Sheet1
Response variable (y)	Explanatory variable (x)	Regression estimate	Regression estimate (%)	F value	p-value
(i) morph. D				2018	0.001
	environmental D	0.059383	14		0.011
	genomic D	0.368289	86		0.001
(i) morph. D				1356	0.001
	environmental D	0.167200	22		0.004
	genomic D	0.443163	58		0.001
	environmental D – genomic D (interaction)	-0.154199	20		0.026
(ii) morph. D BL				365	0.001
	environmental D mean temperature	-0.000354			0.99
	environmental D isothermality	-0.078630	12		0.001
	environmental D temperature seasonality	-0.016044			0.367
	environmental D mean temperature wettest quarter	-0.072831	11		0.01
	environmental D mean temperature driest quarter	-0.002004			0.93
	environmental D precipitation seasonality	0.010773			0.561
	environmental D precipitation warmest quarter	0.099529	15		0.001
	environmental D altitude	0.046345	7		0.033
	environmental D solar radiation	0.047763			0.06
	genomic D	0.345083	54		0.001
(iii) morph. D SL				200	0.001
	environmental D mean temperature	-0.013192			0.54
	environmental D isothermality	-0.066086	31		0.001
	environmental D temperature seasonality	0.006047			0.719
	environmental D mean temperature wettest quarter	0.039894			0.157
	environmental D mean temperature driest quarter	-0.054368	25		0.012
	environmental D precipitation seasonality	-0.003590			0.83
	environmental D precipitation warmest quarter	0.068035	32		0.003
	environmental D altitude	0.001710			0.918
	environmental D solar radiation	0.022921			0.28
	genomic D	0.027487	13		0.001
(iv) morph. D RT				201
	environmental D mean temperature	-0.054444	9		0.022
	environmental D isothermality	-0.094801	15		0.001
	environmental D temperature seasonality	0.049738	8		0.007
	environmental D mean temperature wettest quarter	0.076597	12		0.006
	environmental D mean temperature driest quarter	-0.026714			0.195
	environmental D precipitation seasonality	0.025478			0.161
	environmental D precipitation warmest quarter	0.165007	27		0.001
	environmental D altitude	0.105116	17		0.001
	environmental D solar radiation	0.052191	8		0.027
	genomic D	0.098338	16		0.002
