# Supplementary material for: Geometric Morphometric Versus Genomic Patterns in a Large Polyploid Plant Species Complex
Source: MDPI journal article supplement (doi:10.3390/biology12030418), 2023-03-09
Supplement: s1 [file s1 › Table_S7_Regression_models_Shape_Environment.xlsx]

## Sheet: Tabelle2
	VARIABLE	statistics	BL	SL	RT
	BIO18	d2 model fit	0.339088	0.058849	0.092121
		explained %	6	2	5
		Goodall's F	15.1691	5.077	10.521
		p-value	0	0	0
	BIO3	d2 model fit	0.091349	0.025106	0.064135
		explained %	2	1	3
		Goodall's F	3.898	2.138	7.2213
		p-value	0	0	0
	BIO8	d2 model fit	0.021081	NA	0.040771
		explained %	0.4	NA	2
		Goodall's F	0.8877	NA	4.535
		p-value	0.6925	NA	0
	ALTITUDE	d2 model fit	0.138178	NA	0.077742
		explained %	3	NA	4
		Goodall's F	5.9482	NA	8.8142
		p-value	0	NA	0
	BIO9	d2 model fit	NA	0.02388	NA
		explained %	NA	1	NA
		Goodall's F	NA	2.0326	NA
		p-value	NA	0	NA
	BIO1	d2 model fit	NA	NA	0.045296
		explained %	NA	NA	2
		Goodall's F	NA	NA	5.0514
		p-value	NA	NA	0
	BIO4	d2 model fit	NA	NA	0.084919
		explained %	NA	NA	4
		Goodall's F	NA	NA	9.6652
		p-value	NA	NA	0
	SOLAR RADIATION	d2 model fit	NA	NA	0.102912
		explained %	NA	NA	5
		Goodall's F	NA	NA	11.8189
		p-value	NA	NA	0
